# Supplementary material for: Vicinal difunctionalization of nitriles: modular construction of N-alkyl amidines and late-stage modification
Source: Royal Society of Chemistry journal article supplement (doi:10.1039/d4nj02051k), 2024-01-01

## Supporting Information

### Vicinal Difunctionalization of Nitriles: Modular Construction of *N*-Alkyl Amidines and Late-Stage Modification

Zixin Xiang, Simiao Zhang, Ziyi Zhang, Hang Liu, Junqi Wang, Wenwen Chen, Yong  
Wang\* and Xiaobing Wan\*

*Key Laboratory of Organic Synthesis of Jiangsu Province, College of Chemistry, Chemical  
Engineering and Materials Science, Soochow University, Suzhou, 215123, China*

\* To whom correspondence should be addressed. E-mail: [yowang@suda.edu.cn](mailto:yowang@suda.edu.cn), [wanxb@suda.edu.cn](mailto:wanxb@suda.edu.cn)

## Table of Contents

|                                                   |            |
|---------------------------------------------------|------------|
| <b>1. General information .....</b>               | <b>S2</b>  |
| <b>2. X-Ray diffraction data analysis .....</b>   | <b>S3</b>  |
| <b>3. DFT calculation .....</b>                   | <b>S4</b>  |
| <b>4. Characterization data of products .....</b> | <b>S12</b> |
| <b>5. NMR spectra .....</b>                       | <b>S45</b> |

## General information

Column chromatography was generally performed on silica gel (300-400 mesh) and reactions were monitored by thin layer chromatography (TLC) using UV light to visualize the course of the reactions.

The  $^1\text{H}$  NMR (400 MHz) and  $^{13}\text{C}$  NMR (100 MHz) and  $^{19}\text{F}$  NMR (376 MHz) data were recorded with Chloroform-*d* or DMSO-*d*<sub>6</sub> as solvent at room temperature unless specified otherwise. The chemical shifts ( $\delta$ ) are reported in ppm and coupling constants (*J*) in Hz.  $^1\text{H}$  NMR spectra was recorded with Chloroform-*d* ( $\delta = 7.26$  ppm) or DMSO-*d*<sub>6</sub> (2.50 ppm) as internal reference;  $^{13}\text{C}$  NMR spectra was recorded with Chloroform-*d* ( $\delta = 77.00$  ppm) or DMSO-*d*<sub>6</sub> ( $\delta = 39.50$  ppm) as internal reference. IR and HRMS were performed by the State-authorized Analytical Center in Soochow University.

### General procedure for *N*-alkyl amidines synthesis

To a 25 mL sealed tube, were added sulfonamide (0.2 mmol), nitrile (1.0 mL), alcohol (0.35 mmol, 1.75 equiv.) and trifluoromethanesulfonic anhydride (0.6 mmol, 3.0 equiv., 169.3 mg) separately under air. The mixture was stirred in oil bath at 25 °C for 24 h. When over, the reaction mixture was quenched with sodium carbonate and extracted with ethyl acetate (3×20 mL), then dried over MgSO<sub>4</sub>. The solvent was removed under reduced pressure and the residue was purified by silica gel column chromatography (ethyl acetate/ petroleum ether) to afford desired products.

## X-Ray diffraction data analysis

### X-Ray single-crystal data of product 5an

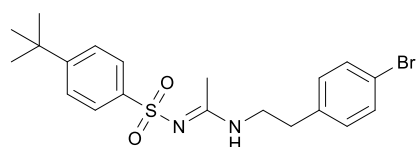

Structure of **5an**  
CCDC: 2309850

≡

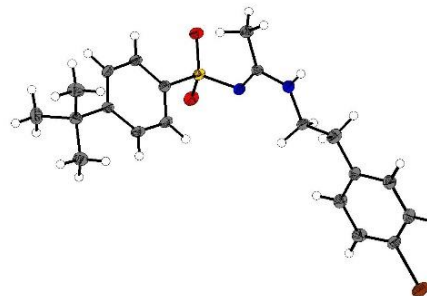

---

|                                           |                                                                   |                |
|-------------------------------------------|-------------------------------------------------------------------|----------------|
| Empirical formula                         | C <sub>20</sub> H <sub>25</sub> BrN <sub>2</sub> O <sub>2</sub> S |                |
| Formula weight                            | 437.39                                                            |                |
| Temperature/K                             | 233.00(10)                                                        |                |
| Crystal system                            | monoclinic                                                        |                |
| Space group                               | P2 <sub>1</sub> /c                                                |                |
| Unit cell dimensions                      | a = 15.8785(8) Å                                                  | α = 90         |
|                                           | b = 11.3457(5) Å                                                  | β = 104.570(5) |
|                                           | c = 11.5314(6) Å                                                  | γ = 90         |
| Volume/Å <sup>3</sup>                     | 2010.61(17)                                                       |                |
| Z                                         | 4                                                                 |                |
| Wavelength/Å                              | 0.71073                                                           |                |
| ρ <sub>calc</sub> /cm <sup>3</sup>        | 1.445                                                             |                |
| μ/mm <sup>-1</sup>                        | 2.165                                                             |                |
| F(000)                                    | 904.0                                                             |                |
| Crystal size/mm <sup>3</sup>              | 0.4 × 0.4 × 0.06                                                  |                |
| Radiation                                 | Mo Kα (λ = 0.71073)                                               |                |
| 2θ range for data collection/°            | 4.462 to 59.122                                                   |                |
| Index ranges                              | -21 ≤ h ≤ 21, -14 ≤ k ≤ 15, -14 ≤ l ≤ 11                          |                |
| Reflections collected                     | 17520                                                             |                |
| Independent reflections                   | 5243 [R <sub>int</sub> = 0.0474, R <sub>sigma</sub> = 0.0544]     |                |
| Data/restraints/parameters                | 5243/0/240                                                        |                |
| Goodness-of-fit on F <sup>2</sup>         | 0.999                                                             |                |
| Final R indexes [I >= 2σ (I)]             | R <sub>1</sub> = 0.0466, wR <sub>2</sub> = 0.0991                 |                |
| Final R indexes [all data]                | R <sub>1</sub> = 0.0848, wR <sub>2</sub> = 0.1155                 |                |
| Largest diff. peak/hole/e Å <sup>-3</sup> | 0.48/-0.41                                                        |                |

---

## DFT calculation

### INT1

|    |   |            |            |            |
|----|---|------------|------------|------------|
| 1  | N | -3.7962510 | 0.4715300  | -0.7060850 |
| 2  | C | -3.7265920 | -0.5874660 | -0.2344920 |
| 3  | S | 0.9300180  | -0.0963960 | 0.8626360  |
| 4  | O | 2.0176350  | -0.1536060 | 1.8267980  |
| 5  | O | -0.3462770 | -0.7618960 | 1.1039680  |
| 6  | C | 1.6022230  | -0.7778190 | -0.7438910 |
| 7  | F | 0.7102610  | -0.5891950 | -1.7187640 |
| 8  | F | 2.7389650  | -0.1609900 | -1.0535180 |
| 9  | F | 1.8246320  | -2.0821010 | -0.5895420 |
| 10 | C | -3.6265640 | -1.9140960 | 0.3606530  |
| 11 | H | -3.7806170 | -2.6813260 | -0.4047830 |
| 12 | H | -2.6338390 | -2.0439160 | 0.8026020  |
| 13 | H | -4.3844640 | -2.0334870 | 1.1414530  |
| 14 | O | 0.7283260  | 1.4407900  | 0.4640690  |
| 15 | C | -0.6050670 | 1.9108020  | -0.0076330 |
| 16 | C | -0.4339650 | 3.3703250  | -0.3567120 |
| 17 | H | -1.3137610 | 1.7560770  | 0.8064240  |
| 18 | H | -0.8954090 | 1.3101910  | -0.8704950 |
| 19 | H | -1.3998710 | 3.7574410  | -0.7001160 |
| 20 | H | -0.1185140 | 3.9514820  | 0.5154780  |
| 21 | H | 0.2975470  | 3.5029500  | -1.1599500 |

Zero-point correction= 0.142594 (Hartree/Particle)

Thermal correction to Energy= 0.157930

Thermal correction to Enthalpy= 0.158874

Thermal correction to Gibbs Free Energy= 0.097778

Sum of electronic and zero-point Energies= -1173.187431

Sum of electronic and thermal Energies= -1173.172095

Sum of electronic and thermal Enthalpies= -1173.171151

Sum of electronic and thermal Free Energies= -1173.232247

M06-2X/6-311G(d,p)-SMD(DCM)//B3LYP/6-31G(d) -SMD(DCM) energy= -1173.303294

### TS1

|    |   |            |            |            |
|----|---|------------|------------|------------|
| 1  | N | -3.3059600 | 0.0039540  | -0.0848020 |
| 2  | C | -4.2944020 | -0.5533200 | 0.1383830  |
| 3  | S | 1.5473150  | 0.5765770  | 0.5797770  |
| 4  | O | 2.8233880  | 1.2744300  | 0.7923780  |
| 5  | O | 0.8521920  | 0.0431480  | 1.7662310  |
| 6  | C | 2.0027390  | -0.9383740 | -0.3980720 |
| 7  | F | 0.8969290  | -1.6324130 | -0.7256980 |
| 8  | F | 2.6384280  | -0.6035920 | -1.5289970 |
| 9  | F | 2.8028570  | -1.7381800 | 0.3198590  |
| 10 | C | -5.5396100 | -1.2493020 | 0.4144610  |
| 11 | H | -5.8632720 | -1.7922710 | -0.4791350 |



|    |   |            |            |            |
|----|---|------------|------------|------------|
| 12 | H | -5.3896380 | -1.9587210 | 1.2343160  |
| 13 | H | -6.3103910 | -0.5259890 | 0.6981270  |
| 14 | O | 0.6270370  | 1.3072120  | -0.3752610 |
| 15 | C | -1.4450850 | 0.8609030  | -0.3298110 |
| 16 | C | -1.8988800 | 2.1457500  | -0.9393070 |
| 17 | H | -1.3073040 | 0.7568450  | 0.7357570  |
| 18 | H | -1.1800480 | 0.0176030  | -0.9490280 |
| 19 | H | -2.4608280 | 1.9665470  | -1.8590710 |
| 20 | H | -2.5045910 | 2.7238570  | -0.2374770 |
| 21 | H | -1.0126760 | 2.7346310  | -1.1934890 |

Zero-point correction= 0.140762 (Hartree/Particle)

Thermal correction to Energy= 0.155548

Thermal correction to Enthalpy= 0.156492

Thermal correction to Gibbs Free Energy= 0.098176

Sum of electronic and zero-point Energies= -1173.151023

Sum of electronic and thermal Energies= -1173.136237

Sum of electronic and thermal Enthalpies= -1173.135293

Sum of electronic and thermal Free Energies= -1173.193609

M06-2X/6-311G(d,p)-SMD(DCM)//B3LYP/6-31G(d) -SMD(DCM) energy= -1173.262602

## INT2

|    |   |            |            |            |
|----|---|------------|------------|------------|
| 1  | N | 2.6900640  | 0.0091450  | 0.1484200  |
| 2  | C | 2.5773920  | -1.0285540 | -0.3302940 |
| 3  | S | -0.9664470 | -0.5834870 | 0.7088850  |
| 4  | O | -2.0950310 | -1.1659170 | 1.4626200  |
| 5  | O | -0.1381000 | 0.3948220  | 1.4557390  |
| 6  | C | -1.7992720 | 0.4721730  | -0.5755220 |
| 7  | F | -0.8892360 | 1.0698440  | -1.3738010 |
| 8  | F | -2.6065130 | -0.2629320 | -1.3588050 |
| 9  | F | -2.5391610 | 1.4367450  | -0.0039480 |
| 10 | C | 2.5321740  | -2.3371430 | -0.9396720 |
| 11 | H | 3.5526960  | -2.6557920 | -1.1759040 |
| 12 | H | 2.0636770  | -3.0359700 | -0.2417770 |
| 13 | H | 1.9309060  | -2.2844520 | -1.8517110 |
| 14 | O | -0.1892050 | -1.5484610 | -0.1126710 |
| 15 | C | 2.7484800  | 1.3185530  | 0.7438690  |
| 16 | C | 2.3207690  | 2.3896030  | -0.2566450 |
| 17 | H | 2.0733890  | 1.2779070  | 1.6010270  |
| 18 | H | 3.7774510  | 1.4580270  | 1.0863880  |
| 19 | H | 2.9816220  | 2.4059410  | -1.1284260 |
| 20 | H | 1.2913370  | 2.2209030  | -0.5815020 |
| 21 | H | 2.3772470  | 3.3609580  | 0.2438810  |

Zero-point correction= 0.143404 (Hartree/Particle)

Thermal correction to Energy= 0.158317

Thermal correction to Enthalpy= 0.159262

Thermal correction to Gibbs Free Energy= 0.100473  
 Sum of electronic and zero-point Energies= -1173.194213  
 Sum of electronic and thermal Energies= -1173.179299  
 Sum of electronic and thermal Enthalpies= -1173.178355  
 Sum of electronic and thermal Free Energies= -1173.237143  
 M06-2X/6-311G(d,p)-SMD(DCM)//B3LYP/6-31G(d) -SMD(DCM) energy= -1173.302386

**Benzenesulfonamide**

|    |   |            |            |            |
|----|---|------------|------------|------------|
| 1  | C | 2.3976040  | 1.2119120  | 0.0399290  |
| 2  | C | 1.0041590  | 1.2194600  | -0.0317880 |
| 3  | C | 0.3237740  | 0.0000400  | -0.0628330 |
| 4  | C | 1.0040650  | -1.2194400 | -0.0318750 |
| 5  | C | 2.3975050  | -1.2120070 | 0.0398520  |
| 6  | C | 3.0921650  | -0.0000740 | 0.0775290  |
| 7  | H | 2.9392390  | 2.1531490  | 0.0610420  |
| 8  | H | 0.4553100  | 2.1542890  | -0.0733900 |
| 9  | H | 0.4551540  | -2.1542320 | -0.0735400 |
| 10 | H | 2.9390660  | -2.1532880 | 0.0609100  |
| 11 | S | -1.4673880 | 0.0001020  | -0.1421890 |
| 12 | O | -1.8909680 | -1.2779420 | -0.7336900 |
| 13 | N | -1.9406180 | -0.0008650 | 1.4770630  |
| 14 | H | -2.4816630 | 0.8380070  | 1.6868480  |
| 15 | H | -2.4823480 | -0.8396070 | 1.6855990  |
| 16 | O | -1.8909260 | 1.2788030  | -0.7323050 |
| 17 | H | 4.1772890  | -0.0001200 | 0.1311910  |

Zero-point correction= 0.126911 (Hartree/Particle)

Thermal correction to Energy= 0.135993

Thermal correction to Enthalpy= 0.156492

Thermal correction to Gibbs Free Energy= 0.092117

Sum of electronic and zero-point Energies= -835.996078

Sum of electronic and thermal Energies= -835.986995

Sum of electronic and thermal Enthalpies= -835.986051

Sum of electronic and thermal Free Energies= -836.030872

M06-2X/6-311G(d,p)-SMD(DCM)//B3LYP/6-31G(d) -SMD(DCM) energy= -836.096234

**TS2**

|    |   |            |            |            |
|----|---|------------|------------|------------|
| 1  | N | -3.0899330 | 1.9570680  | -0.0632580 |
| 2  | C | -2.7884940 | 1.2907650  | -0.9992490 |
| 3  | S | 1.4543920  | 2.0216380  | -0.2944930 |
| 4  | O | 1.0870070  | 1.4919370  | -1.6304370 |
| 5  | O | 1.7451600  | 3.4634480  | -0.2200640 |
| 6  | C | 3.0846910  | 1.2084540  | 0.0729100  |
| 7  | F | 3.5303070  | 1.5622290  | 1.2880760  |
| 8  | F | 2.9652620  | -0.1294810 | 0.0420410  |
| 9  | F | 4.0047550  | 1.5680800  | -0.8355390 |
| 10 | C | -3.0707730 | 1.0327350  | -2.4188710 |

|    |   |            |            |            |
|----|---|------------|------------|------------|
| 11 | H | -3.3163050 | -0.0230220 | -2.5629070 |
| 12 | H | -3.9119210 | 1.6623810  | -2.7227890 |
| 13 | H | -2.1900380 | 1.2777970  | -3.0210790 |
| 14 | O | 0.5746490  | 1.5010800  | 0.8032130  |
| 15 | C | -2.8450540 | 2.2270450  | 1.3369660  |
| 16 | C | -4.0500920 | 1.8149540  | 2.1802560  |
| 17 | H | -1.9361600 | 1.7009750  | 1.6454240  |
| 18 | H | -2.6646110 | 3.3027230  | 1.4185720  |
| 19 | H | -4.9522100 | 2.3491020  | 1.8660680  |
| 20 | H | -4.2266510 | 0.7381270  | 2.1046960  |
| 21 | H | -3.8450020 | 2.0621980  | 3.2266660  |
| 22 | C | 1.3214620  | -4.0776070 | -0.6955460 |
| 23 | C | 0.1261990  | -3.3766960 | -0.8552990 |
| 24 | C | -0.2545050 | -2.4732370 | 0.1408490  |
| 25 | C | 0.5220660  | -2.2513320 | 1.2830580  |
| 26 | C | 1.7153830  | -2.9581480 | 1.4220760  |
| 27 | C | 2.1125560  | -3.8671180 | 0.4368330  |
| 28 | H | 1.6317490  | -4.7881670 | -1.4556280 |
| 29 | H | -0.5013790 | -3.5337490 | -1.7258210 |
| 30 | H | 0.2027760  | -1.5486980 | 2.0455260  |
| 31 | H | 2.3320160  | -2.7998500 | 2.3015360  |
| 32 | S | -1.7747350 | -1.5596940 | -0.0586780 |
| 33 | O | -2.3668230 | -1.2876700 | 1.2533930  |
| 34 | N | -1.2888390 | -0.0017780 | -0.6453010 |
| 35 | H | -0.7554740 | -0.0851500 | -1.5186680 |
| 36 | H | -0.6578850 | 0.4810960  | 0.0342650  |
| 37 | O | -2.5673400 | -2.1544590 | -1.1378420 |
| 38 | H | 3.0432280  | -4.4149020 | 0.5535910  |

Zero-point correction= 0.272701 (Hartree/Particle)

Thermal correction to Energy= 0.296601

Thermal correction to Enthalpy= 0.297545

Thermal correction to Gibbs Free Energy= 0.217848

Sum of electronic and zero-point Energies= -2009.184825

Sum of electronic and thermal Energies= -2009.160925

Sum of electronic and thermal Enthalpies= -2009.159981

Sum of electronic and thermal Free Energies= -2009.239678

M06-2X/6-311G(d,p)-SMD(DCM)//B3LYP/6-31G(d) -SMD(DCM) energy= -2009.370535

### INT3

|   |   |           |            |            |
|---|---|-----------|------------|------------|
| 1 | C | 2.2916790 | -1.5782480 | 0.2933010  |
| 2 | C | 3.6101980 | -1.6629970 | -0.1708470 |
| 3 | C | 3.9862100 | -2.8130410 | -0.8608980 |
| 4 | C | 3.0584890 | -3.8367790 | -1.0776040 |
| 5 | C | 1.7469830 | -3.7252820 | -0.6067910 |
| 6 | C | 1.3433920 | -2.5876210 | 0.0903500  |

|    |   |            |            |            |
|----|---|------------|------------|------------|
| 7  | H | 4.3187880  | -0.8623860 | 0.0106850  |
| 8  | H | 5.0039110  | -2.9089580 | -1.2260670 |
| 9  | H | 3.3607440  | -4.7288320 | -1.6185030 |
| 10 | H | 1.0326430  | -4.5238450 | -0.7806320 |
| 11 | H | 0.3228000  | -2.4845350 | 0.4473110  |
| 12 | S | 1.8065450  | -0.1268050 | 1.1833860  |
| 13 | O | 0.7147060  | -0.3886100 | 2.1100070  |
| 14 | O | 2.9587980  | 0.6877450  | 1.5464470  |
| 15 | N | 0.9857110  | 0.8798840  | -0.2027690 |
| 16 | H | 1.5862240  | 0.7813620  | -1.0338600 |
| 17 | C | 0.8796810  | 2.3387180  | 0.0891250  |
| 18 | C | -0.1576360 | 2.6722970  | 1.1191310  |
| 19 | H | -1.0607010 | 2.0750180  | 0.9663940  |
| 20 | H | 0.2197650  | 2.4548250  | 2.1257600  |
| 21 | H | -0.4208610 | 3.7302640  | 1.0781150  |
| 22 | N | 1.6971100  | 3.0282850  | -0.5784320 |
| 23 | C | 1.7678990  | 4.4811850  | -0.4785490 |
| 24 | C | 1.6842910  | 5.1028490  | -1.8729740 |
| 25 | H | 2.7464120  | 4.7063830  | -0.0355730 |
| 26 | H | 1.0030670  | 4.9097530  | 0.1800250  |
| 27 | H | 1.8140900  | 6.1883310  | -1.8039560 |
| 28 | H | 2.4643880  | 4.6998890  | -2.5277400 |
| 29 | H | 0.7102430  | 4.9023890  | -2.3329870 |
| 30 | H | 0.0315060  | 0.4537010  | -0.4243580 |
| 31 | S | -2.4187870 | -0.9726320 | -0.6788900 |
| 32 | O | -1.8752920 | -1.9492890 | 0.2874950  |
| 33 | O | -3.1638220 | -1.5186630 | -1.8248950 |
| 34 | O | -1.4543550 | 0.1188070  | -1.0513880 |
| 35 | C | -3.6989040 | -0.0450800 | 0.2990330  |
| 36 | F | -4.6465370 | -0.8816400 | 0.7457320  |
| 37 | F | -3.1381050 | 0.5587290  | 1.3631550  |
| 38 | F | -4.2854570 | 0.8967470  | -0.4543480 |

Zero-point correction= 0.274992 (Hartree/Particle)

Thermal correction to Energy= 0.298600

Thermal correction to Enthalpy= 0.299544

Thermal correction to Gibbs Free Energy= 0.221511

Sum of electronic and zero-point Energies= -2009.192589

Sum of electronic and thermal Energies= -2009.168980

Sum of electronic and thermal Enthalpies= -2009.168036

Sum of electronic and thermal Free Energies= -2009.246069

M06-2X/6-311G(d,p)-SMD(DCM)//B3LYP/6-31G(d) -SMD(DCM) energy= -2009.381235

#### **TfOH**

|   |   |            |            |           |
|---|---|------------|------------|-----------|
| 1 | S | -0.8522870 | -0.1430310 | 0.0612480 |
| 2 | O | -1.2485440 | -0.0214820 | 1.4576260 |

|   |   |            |            |            |
|---|---|------------|------------|------------|
| 3 | O | -1.2219660 | -1.2774860 | -0.7650770 |
| 4 | C | 1.0099350  | 0.0108540  | -0.0028840 |
| 5 | F | 1.4183910  | -0.0312120 | -1.2664380 |
| 6 | F | 1.3726580  | 1.1652420  | 0.5533370  |
| 7 | F | 1.5352200  | -1.0038720 | 0.6783790  |
| 8 | O | -1.2713090 | 1.1887100  | -0.7572130 |
| 9 | H | -1.4248960 | 1.9340250  | -0.1328500 |

Zero-point correction= 0.038579 (Hartree/Particle)

Thermal correction to Energy= 0.046025

Thermal correction to Enthalpy= 0.046969

Thermal correction to Gibbs Free Energy= 0.006419

Sum of electronic and zero-point Energies= -961.947900

Sum of electronic and thermal Energies= -961.940455

Sum of electronic and thermal Enthalpies= -961.939511

Sum of electronic and thermal Free Energies= -961.980061

M06-2X/6-311G(d,p)-SMD(DCM)//B3LYP/6-31G(d) -SMD(DCM) energy= -962.000047

#### INT4

|    |   |            |            |            |
|----|---|------------|------------|------------|
| 1  | N | 2.9051180  | -0.4894620 | 0.7973750  |
| 2  | C | 1.7778510  | 0.1125380  | 0.8355030  |
| 3  | C | 1.1249120  | 0.4125350  | 2.1570160  |
| 4  | H | 1.0004840  | 1.4895400  | 2.3040800  |
| 5  | H | 0.1331720  | -0.0483400 | 2.2295190  |
| 6  | H | 1.7598230  | 0.0088810  | 2.9474440  |
| 7  | C | 3.5439310  | -0.7826600 | -0.4853300 |
| 8  | C | 4.8633680  | -1.5174480 | -0.2641220 |
| 9  | H | 2.8846660  | -1.4003100 | -1.1178320 |
| 10 | H | 3.7337990  | 0.1478000  | -1.0450290 |
| 11 | H | 5.5485290  | -0.9095720 | 0.3377560  |
| 12 | H | 4.6966650  | -2.4632600 | 0.2641400  |
| 13 | H | 5.3493700  | -1.7385720 | -1.2214800 |
| 14 | C | -2.7153200 | -2.0016370 | -0.8064260 |
| 15 | C | -1.7191210 | -1.0582490 | -1.0494210 |
| 16 | C | -1.6350250 | 0.0624390  | -0.2165210 |
| 17 | C | -2.5265020 | 0.2623020  | 0.8389330  |
| 18 | C | -3.5210310 | -0.6911170 | 1.0682070  |
| 19 | C | -3.6136840 | -1.8186360 | 0.2502960  |
| 20 | H | -2.7916930 | -2.8778790 | -1.4434040 |
| 21 | H | -1.0224200 | -1.1922700 | -1.8711550 |
| 22 | H | -2.4440140 | 1.1454400  | 1.4627090  |
| 23 | H | -4.2220430 | -0.5482750 | 1.8852730  |
| 24 | S | -0.3798990 | 1.2973940  | -0.5496430 |
| 25 | O | -0.5168080 | 2.3673910  | 0.4417710  |
| 26 | N | 1.1058670  | 0.5207700  | -0.3352520 |
| 27 | H | 1.5399850  | 0.3103750  | -1.2288190 |

28 O -0.3897260 1.6046020 -1.9850040  
29 H -4.3888410 -2.5573520 0.4332800

Zero-point correction=0.233857 (Hartree/Particle)

Thermal correction to Energy= 0.248612

Thermal correction to Enthalpy= 0.249556

Thermal correction to Gibbs Free Energy= 0.192247

Sum of electronic and zero-point Energies= -1047.238495

Sum of electronic and thermal Energies= -1047.223740

Sum of electronic and thermal Enthalpies= -1047.222796

Sum of electronic and thermal Free Energies= -1047.280105

M06-2X/6-311G(d,p)-SMD(DCM)//B3LYP/6-31G(d) -SMD(DCM) energy= -1047.39123

#### TM

|    |   |            |            |            |
|----|---|------------|------------|------------|
| 1  | C | 3.6817280  | 0.3448890  | 1.2998100  |
| 2  | C | 2.3155340  | 0.5835520  | 1.1367410  |
| 3  | C | 1.7017680  | 0.2143380  | -0.0607340 |
| 4  | C | 2.4260460  | -0.3778910 | -1.0982210 |
| 5  | C | 3.7899170  | -0.6127980 | -0.9232960 |
| 6  | C | 4.4165970  | -0.2536010 | 0.2737810  |
| 7  | H | 4.1704220  | 0.6301510  | 2.2272230  |
| 8  | H | 1.7341600  | 1.0557660  | 1.9214820  |
| 9  | H | 1.9333210  | -0.6427620 | -2.0281000 |
| 10 | H | 4.3633620  | -1.0721360 | -1.7235380 |
| 11 | S | -0.0524530 | 0.5328180  | -0.2827860 |
| 12 | O | -0.2553270 | 0.8753340  | -1.7100550 |
| 13 | O | -0.4489790 | 1.5457600  | 0.7207760  |
| 14 | H | 5.4797160  | -0.4365210 | 0.4042650  |
| 15 | N | -0.6402390 | -0.9663690 | 0.0819910  |
| 16 | C | -1.8981470 | -1.3511050 | 0.1568510  |
| 17 | C | -2.0867630 | -2.7759000 | 0.6408220  |
| 18 | H | -2.3356170 | -2.7695240 | 1.7090700  |
| 19 | H | -2.8990760 | -3.2773200 | 0.1047640  |
| 20 | H | -1.1613280 | -3.3370510 | 0.5065300  |
| 21 | N | -3.0483250 | -0.7094620 | -0.1025940 |
| 22 | C | -3.3427720 | 0.6620420  | -0.5373820 |
| 23 | C | -3.7972490 | 1.5559670  | 0.6153380  |
| 24 | H | -4.1380320 | 0.5780870  | -1.2862250 |
| 25 | H | -2.4736120 | 1.0754800  | -1.0455340 |
| 26 | H | -4.0636710 | 2.5469290  | 0.2294960  |
| 27 | H | -4.6802650 | 1.1376790  | 1.1131200  |
| 28 | H | -2.9980030 | 1.6760420  | 1.3519110  |
| 29 | H | -3.8776810 | -1.2648010 | 0.0763060  |

Zero-point correction= 0.235145 (Hartree/Particle)

Thermal correction to Energy= 0.249812

Thermal correction to Enthalpy= 0.250756

Thermal correction to Gibbs Free Energy= 0.193605  
Sum of electronic and zero-point Energies= -1047.246723  
Sum of electronic and thermal Energies= -1047.232056  
Sum of electronic and thermal Enthalpies= -1047.231112  
Sum of electronic and thermal Free Energies= -1047.288263  
M06-2X/6-311G(d,p)-SMD(DCM)//B3LYP/6-31G(d) -SMD(DCM) energy= -1047.402520

## Characterization data of products

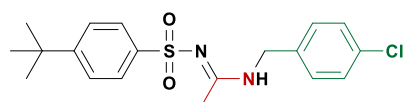

### *N'*-((4-*tert*-butylphenyl)sulfonyl)-*N*-(4-chlorobenzyl)acetimidamide (4a)

White solid (58.9 mg, 78% yield, eluent: PE/EA = 1:1). mp: 98-100 °C. <sup>1</sup>H NMR (400 MHz, DMSO-*d*<sub>6</sub>) δ 9.17 (t, *J* = 5.3 Hz, 1H), 7.66 – 7.64 (m, 2H), 7.51 – 7.49 (m, 2H), 7.36 – 7.34 (m, 2H), 7.27 – 7.25 (m, 2H), 4.37 (d, *J* = 5.5 Hz, 2H), 2.30 (s, 3H), 1.28 (s, 9H). <sup>13</sup>C NMR (100 MHz, DMSO-*d*<sub>6</sub>) δ 165.6, 154.3, 141.0, 136.5, 131.8, 129.6, 128.3, 125.6, 125.5, 43.9, 34.6, 30.8, 19.9. HRMS (ESI-TOF): Anal Calcd. For. C<sub>19</sub>H<sub>23</sub>ClN<sub>2</sub>O<sub>2</sub>S+H<sup>+</sup>: 379.1242, found: 379.1245. Anal Calcd. For. C<sub>19</sub>H<sub>23</sub><sup>37</sup>ClN<sub>2</sub>O<sub>2</sub>S+H<sup>+</sup>: 381.1212, found: 381.1195. IR (neat, cm<sup>-1</sup>): ν 3392, 1646, 1260, 1151, 1009, 798, 642.

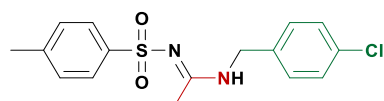

### *N*-(4-chlorobenzyl)-*N'*-tosylacetimidamide (4b)

White solid (48.9 mg, 73% yield, eluent: PE/EA = 1:2). mp: 99-101 °C. <sup>1</sup>H NMR (400 MHz, DMSO-*d*<sub>6</sub>) δ 9.17 (t, *J* = 4.8 Hz, 1H), 7.61 – 7.59 (m, 2H), 7.41 – 7.36 (m, 2H), 7.30 – 7.25 (m, 4H), 4.36 (d, *J* = 5.5 Hz, 2H), 2.34 (s, 3H), 2.27 (s, 3H). <sup>13</sup>C NMR (100 MHz, DMSO-*d*<sub>6</sub>) δ 165.7, 141.6, 141.1, 136.5, 131.9, 129.6, 129.2, 128.3, 125.8, 43.9, 20.9, 19.9. HRMS (ESI-TOF): Anal Calcd. For. C<sub>16</sub>H<sub>17</sub>ClN<sub>2</sub>O<sub>2</sub>S+H<sup>+</sup>: 337.0772, found: 337.0768. Anal Calcd. For. C<sub>16</sub>H<sub>17</sub><sup>37</sup>ClN<sub>2</sub>O<sub>2</sub>S+H<sup>+</sup>: 339.0743, found: 339.0740. IR (neat, cm<sup>-1</sup>): ν 3392, 2988, 1653, 1542, 1274, 1140, 994, 824, 762, 661.

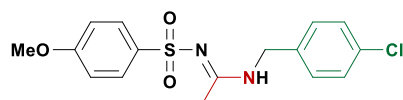

### *N*-(4-chlorobenzyl)-*N'*-((4-methoxyphenyl)sulfonyl)acetimidamide (4c)

White solid (59.3 mg, 84% yield, eluent: PE/EA = 1:2). mp: 58-60 °C. <sup>1</sup>H NMR (400 MHz, DMSO-*d*<sub>6</sub>) δ 9.13 (t, *J* = 5.7 Hz, 1H), 7.65 – 7.63 (m, 2H), 7.39 – 7.36 (m, 2H), 7.27 – 7.25 (m, 2H), 7.03 – 7.00 (m, 2H), 4.35 (d, *J* = 5.5 Hz, 2H), 3.81 (s, 3H), 2.25 (s, 3H). <sup>13</sup>C NMR (100 MHz, DMSO-*d*<sub>6</sub>) δ 165.5, 161.4, 136.6, 135.8, 131.8, 129.6, 128.3, 127.8, 113.8, 55.5, 43.8, 19.8. HRMS (ESI-TOF): Anal Calcd. For. C<sub>16</sub>H<sub>17</sub>ClN<sub>2</sub>O<sub>3</sub>S+H<sup>+</sup>: 353.0721, found: 353.0719. Anal Calcd. For. C<sub>16</sub>H<sub>17</sub><sup>37</sup>ClN<sub>2</sub>O<sub>3</sub>S+H<sup>+</sup>: 355.0692, found: 355.0697. IR (neat, cm<sup>-1</sup>): ν 3392, 2921, 1648, 1544, 1410, 1257, 1138, 1085, 1025, 799, 660.

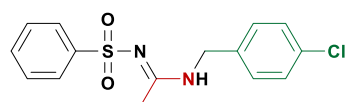

### *N*-(4-chlorobenzyl)-*N'*-(phenylsulfonyl)acetimidamide (4d)

Colorless liquid (36.5 mg, 57% yield, eluent: PE/EA = 1:1.5). <sup>1</sup>H NMR (400 MHz, DMSO-*d*<sub>6</sub>) δ 9.21 (t, *J* = 5.7 Hz, 1H), 7.74 – 7.71 (m, 2H), 7.58 – 7.54 (m, 1H), 7.52 – 7.48 (m, 2H), 7.39 – 7.35 (m, 2H), 7.28 – 7.24 (m, 2H), 4.37 (d, *J* = 5.6 Hz, 2H), 2.29 (s, 3H). <sup>13</sup>C NMR (100 MHz, DMSO-



$d_6$ )  $\delta$  165.8, 143.8, 136.5, 131.8, 131.5, 129.6, 128.8, 128.3, 125.7, 44.0, 19.9. **HRMS** (ESI-TOF): Anal Calcd. For.  $C_{15}H_{15}ClN_2O_2S+H^+$ : 323.0616, found: 323.0596. Anal Calcd. For.  $C_{15}H_{15}^{37}ClN_2O_2S+H^+$ : 325.0586, found: 325.0588. **IR** (neat,  $cm^{-1}$ ):  $\nu$  3403, 2988, 1551, 1445, 1274, 1147, 1024, 822, 760, 630.

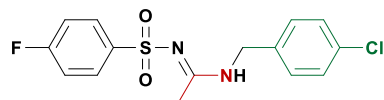

***N*-(4-chlorobenzyl)-*N'*-((4-fluorophenyl)sulfonyl)acetimidamide (4e)**

White solid (44.3 mg, 65% yield, eluent: PE/EA = 1:2). mp: 68-70 °C.  **$^1H$  NMR** (400 MHz, DMSO- $d_6$ )  $\delta$  9.26 (t,  $J$  = 5.6 Hz, 1H), 7.80 – 7.76 (m, 2H), 7.38 – 7.36 (m, 2H), 7.34 – 7.29 (m, 2H), 7.27 – 7.25 (m, 2H), 4.37 (d,  $J$  = 5.5 Hz, 2H), 2.30 (s, 3H).  **$^{13}C$  NMR** (100 MHz, DMSO- $d_6$ )  $\delta$  165.8, 163.5 (d,  $J$  = 249.5 Hz), 140.3 (d,  $J$  = 3.1 Hz), 136.4, 131.9, 129.6, 128.6 (d,  $J$  = 9.2 Hz), 128.3, 115.8 (d,  $J$  = 22.4 Hz), 44.0, 20.0.  **$^{19}F$  NMR** (376 MHz, DMSO- $d_6$ )  $\delta$  -108.32 (s, 1F). **HRMS** (ESI-TOF): Anal Calcd. For.  $C_{15}H_{14}ClFN_2O_2S+H^+$ : 341.0521, found: 341.0520. Anal Calcd. For.  $C_{15}H_{14}^{37}ClFN_2O_2S+H^+$ : 343.0492, found: 343.0494. **IR** (neat,  $cm^{-1}$ ):  $\nu$  3332, 2972, 1648, 1544, 1263, 1142, 1086, 994, 820, 666.

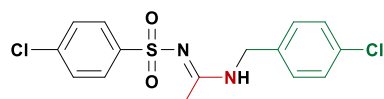

***N*-(4-chlorobenzyl)-*N'*-((4-chlorophenyl)sulfonyl)acetimidamide (4f)**

Yellow solid (57.0 mg, 80% yield, eluent: PE/EA = 1:1). mp: 78-80 °C.  **$^1H$  NMR** (400 MHz, DMSO- $d_6$ )  $\delta$  9.30 (t,  $J$  = 5.6 Hz, 1H), 7.74 – 7.70 (m, 2H), 7.58 – 7.54 (m, 2H), 7.39 – 7.35 (m, 2H), 7.26 – 7.23 (m, 2H), 4.36 (d,  $J$  = 5.4 Hz, 2H), 2.29 (s, 3H).  **$^{13}C$  NMR** (100 MHz, DMSO- $d_6$ )  $\delta$  165.9, 142.7, 136.4, 136.3, 131.9, 129.6, 128.9, 128.3, 127.7, 44.0, 20.0. **HRMS** (ESI-TOF): Anal Calcd. For.  $C_{15}H_{14}Cl_2N_2O_2S+Na^+$ : 379.0045, found: 379.0046. Anal Calcd. For.  $C_{15}H_{14}^{37}ClClN_2O_2S+Na^+$ : 381.0016, found: 381.0016. **IR** (neat,  $cm^{-1}$ ):  $\nu$  3393, 2963, 1648, 1541, 1441, 1285, 1141, 1082, 1024, 737, 622.

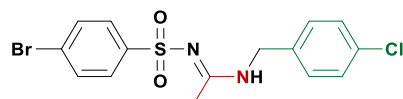

***N'*-((4-bromophenyl)sulfonyl)-*N*-(4-chlorobenzyl)acetimidamide (4g)**

White solid (50.7 mg, 63% yield, eluent: PE/EA = 1:2). mp: 83-85 °C.  **$^1H$  NMR** (400 MHz, DMSO- $d_6$ )  $\delta$  9.30 (t,  $J$  = 5.6 Hz, 1H), 7.74 – 7.69 (m, 2H), 7.66 – 7.62 (m, 2H), 7.38 – 7.35 (m, 2H), 7.26 – 7.24 (m, 2H), 4.37 (d,  $J$  = 5.6 Hz, 2H), 2.30 (s, 3H).  **$^{13}C$  NMR** (100 MHz, DMSO- $d_6$ )  $\delta$  165.9, 143.1, 136.4, 131.9, 131.8, 129.6, 128.3, 127.8, 125.2, 44.0, 20.0. **HRMS** (ESI-TOF): Anal Calcd. For.  $C_{15}H_{14}BrClN_2O_2S+H^+$ : 400.9721, found: 400.9727. Anal Calcd. For.  $C_{15}H_{14}Br^{37}ClN_2O_2S+H^+$ : 402.9700, found: 402.9689. **IR** (neat,  $cm^{-1}$ ):  $\nu$  3393, 2988, 1653, 1549, 1426, 1256, 1138, 1085, 994, 824, 763.

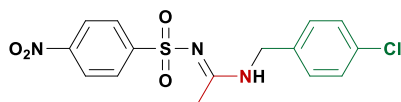

***N*-(4-chlorobenzyl)-*N'*-(4-nitrophenyl)sulfonylacetimidamide (4h)**

Yellow solid (57.7 mg, 79% yield, eluent: PE/EA = 1:1.5). mp: 85-87 °C. <sup>1</sup>H NMR (400 MHz, DMSO-*d*<sub>6</sub>) δ 9.48 (t, *J* = 5.6 Hz, 1H), 8.33 – 8.29 (m, 2H), 7.96 – 7.92 (m, 2H), 7.38 – 7.34 (m, 2H), 7.26 – 7.23 (m, 2H), 4.37 (d, *J* = 5.0 Hz, 2H), 2.32 (s, 3H). <sup>13</sup>C NMR (100 MHz, DMSO-*d*<sub>6</sub>) δ 166.2, 149.1, 149.0, 136.3, 131.9, 129.6, 128.4, 127.3, 124.2, 44.2, 20.2. HRMS (ESI-TOF): Anal Calcd. For. C<sub>15</sub>H<sub>14</sub>ClN<sub>3</sub>O<sub>4</sub>S+H<sup>+</sup>: 368.0466, found: 368.0466. Anal Calcd. For. C<sub>15</sub>H<sub>14</sub><sup>37</sup>ClN<sub>3</sub>O<sub>4</sub>S+H<sup>+</sup>: 370.0437, found: 370.0433. IR (neat, cm<sup>-1</sup>): ν 3318, 2964, 1648, 1523, 1346, 1262, 1146, 1088, 1024, 759, 668.

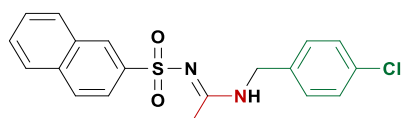

***N*-(4-chlorobenzyl)-*N'*-(naphthalen-2-ylsulfonyl)acetimidamide (4i)**

White solid (60.8 mg, 82% yield, eluent: PE/EA = 1:1.5). mp: 100-102 °C. <sup>1</sup>H NMR (400 MHz, DMSO-*d*<sub>6</sub>) δ 9.28 (t, *J* = 5.8 Hz, 1H), 8.36 – 8.35 (m, 1H), 8.10 – 8.08 (m, 1H), 8.04 – 7.99 (m, 2H), 7.73 – 7.71 (m, 1H), 7.68 – 7.61 (m, 2H), 7.35 – 7.32 (m, 2H), 7.27 – 7.25 (m, 2H), 4.38 (d, *J* = 5.6 Hz, 2H), 2.32 (s, 3H). <sup>13</sup>C NMR (100 MHz, DMSO-*d*<sub>6</sub>) δ 165.9, 140.9, 136.5, 133.8, 131.8, 131.7, 129.6, 129.1, 128.8, 128.31, 128.29, 127.7, 127.3, 125.7, 122.4, 44.0, 20.0. HRMS (ESI-TOF): Anal Calcd. For. C<sub>19</sub>H<sub>17</sub>ClN<sub>2</sub>O<sub>2</sub>S+Na<sup>+</sup>: 395.0591, found: 395.0586. Anal Calcd. For. C<sub>19</sub>H<sub>17</sub><sup>37</sup>ClN<sub>2</sub>O<sub>2</sub>S+Na<sup>+</sup>: 397.0562, found: 397.0578. IR (neat, cm<sup>-1</sup>): ν 3391, 2988, 1653, 1285, 1142, 993, 825, 754, 669.

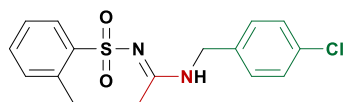

***N*-(4-chlorobenzyl)-*N'*-(*o*-tolylsulfonyl)acetimidamide (4j)**

White solid (47.1 mg, 70% yield, eluent: PE/EA = 1:1). mp: 68-70 °C. <sup>1</sup>H NMR (400 MHz, DMSO-*d*<sub>6</sub>) δ 9.18 (t, *J* = 5.7 Hz, 1H), 7.87 – 7.84 (m, 1H), 7.46 – 7.42 (m, 1H), 7.37 – 7.35 (m, 2H), 7.33 – 7.29 (m, 2H), 7.25 – 7.23 (m, 2H), 4.37 (d, *J* = 5.7 Hz, 2H), 2.42 (s, 3H), 2.27 (s, 3H). <sup>13</sup>C NMR (100 MHz, DMSO-*d*<sub>6</sub>) δ 165.8, 141.6, 136.5, 136.4, 132.0, 131.8, 131.7, 129.4, 128.3, 126.8, 125.7, 43.8, 19.9, 19.7. HRMS (ESI-TOF): Anal Calcd. For. C<sub>16</sub>H<sub>17</sub>ClN<sub>2</sub>O<sub>2</sub>S+H<sup>+</sup>: 337.0772, found: 337.0762. Anal Calcd. For. C<sub>16</sub>H<sub>17</sub><sup>37</sup>ClN<sub>2</sub>O<sub>2</sub>S+H<sup>+</sup>: 339.0743, found: 339.0724. IR (neat, cm<sup>-1</sup>): ν 3331, 2963, 1538, 1259, 1061, 1014, 795, 684.

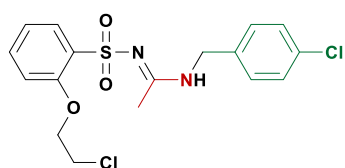

***N*-(4-chlorobenzyl)-*N'*-(2-(2-chloroethoxy)phenyl)sulfonylacetimidamide (4k)**

White solid (36.9 mg, 46% yield, eluent: PE/EA = 1:2). mp: 72-74 °C. <sup>1</sup>H NMR (400 MHz, DMSO-

$d_6$ )  $\delta$  9.02 (t,  $J = 5.7$  Hz, 1H), 7.82 – 7.79 (m, 1H), 7.54 – 7.50 (m, 1H), 7.28 – 7.26 (m, 2H), 7.20 – 7.17 (m, 2H), 7.16 – 7.13 (m, 1H), 7.08 – 7.04 (m, 1H), 4.31 (d,  $J = 5.7$  Hz, 2H), 4.24 (t,  $J = 5.3$  Hz, 2H), 3.79 (t,  $J = 5.2$  Hz, 2H), 2.35 (s, 3H).  $^{13}\text{C}$  NMR (100 MHz, DMSO- $d_6$ )  $\delta$  165.6, 155.0, 136.6, 133.4, 131.7, 129.6, 128.1, 128.0, 120.3, 113.8, 68.9, 43.8, 42.5, 20.3. **HRMS** (ESI-TOF): Anal Calcd. For.  $\text{C}_{17}\text{H}_{18}\text{Cl}_2\text{N}_2\text{O}_3\text{S}+\text{Na}^+$ : 423.0307, found: 423.0326. Anal Calcd. For.  $\text{C}_{17}\text{H}_{18}^{37}\text{Cl}_2\text{N}_2\text{O}_3\text{S}+\text{Na}^+$ : 425.0278, found: 425.0258. **IR** (neat,  $\text{cm}^{-1}$ ):  $\nu$  3281, 2966, 1558, 1422, 1260, 1124, 1025, 797, 628.

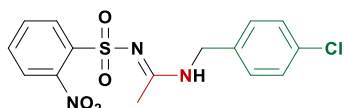

***N*-(4-chlorobenzyl)-*N'*-((2-nitrophenyl)sulfonyl)acetimidamide (4l)**

Yellow liquid (55.9 mg, 76% yield, eluent: PE/EA = 1:1).  $^1\text{H}$  NMR (400 MHz, DMSO- $d_6$ )  $\delta$  9.48 (t,  $J = 5.8$  Hz, 1H), 7.98 – 7.96 (m, 1H), 7.88 – 7.86 (m, 1H), 7.81 – 7.78 (m, 1H), 7.78 – 7.74 (m, 1H), 7.34 – 7.31 (m, 2H), 7.26 – 7.24 (m, 2H), 4.34 (d,  $J = 5.5$  Hz, 2H), 2.29 (s, 3H).  $^{13}\text{C}$  NMR (100 MHz, DMSO- $d_6$ )  $\delta$  165.9, 147.1, 136.1, 135.2, 133.3, 132.1, 131.9, 129.7, 128.7, 128.3, 124.0, 44.0, 20.4. **HRMS** (ESI-TOF): Anal Calcd. For.  $\text{C}_{15}\text{H}_{14}\text{ClN}_3\text{O}_4\text{S}+\text{Na}^+$ : 390.0286, found: 390.0306. Anal Calcd. For.  $\text{C}_{15}\text{H}_{14}^{37}\text{ClN}_3\text{O}_4\text{S}+\text{Na}^+$ : 392.0256, found: 392.0242. **IR** (neat,  $\text{cm}^{-1}$ ):  $\nu$  3407, 2923, 1658, 1542, 1376, 1259, 1023, 823, 762.

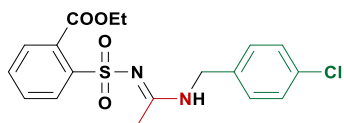

**ethyl-2-(*N*-(1-((4-chlorobenzyl)amino)ethylidene)sulfamoyl)benzoate (4m)**

Yellow liquid (33.9 mg, 43% yield, eluent: PE/EA = 1:2).  $^1\text{H}$  NMR (400 MHz, DMSO- $d_6$ )  $\delta$  9.21 (t,  $J = 5.6$  Hz, 1H), 7.85 – 7.83 (m, 1H), 7.66 – 7.62 (m, 1H), 7.62 – 7.58 (m, 1H), 7.54 – 7.52 (m, 1H), 7.35 – 7.32 (m, 2H), 7.27 – 7.23 (m, 2H), 4.36 (d,  $J = 5.6$  Hz, 2H), 4.23 (q,  $J = 7.1$  Hz, 2H), 2.28 (s, 3H), 1.24 (t,  $J = 7.1$  Hz, 3H).  $^{13}\text{C}$  NMR (100 MHz, DMSO- $d_6$ )  $\delta$  167.4, 165.5, 140.8, 136.3, 131.9, 131.7, 131.6, 130.4, 129.7, 128.3, 128.2, 127.5, 61.3, 43.9, 20.2, 13.8. **HRMS** (ESI-TOF): Anal Calcd. For.  $\text{C}_{18}\text{H}_{19}\text{ClN}_2\text{O}_4\text{S}+\text{H}^+$ : 395.0827, found: 395.0826. Anal Calcd. For.  $\text{C}_{18}\text{H}_{19}^{37}\text{ClN}_2\text{O}_4\text{S}+\text{H}^+$ : 397.0797, found: 397.0813. **IR** (neat,  $\text{cm}^{-1}$ ):  $\nu$  3256, 2987, 1726, 1552, 1434, 1284, 1152, 1024, 759, 628.

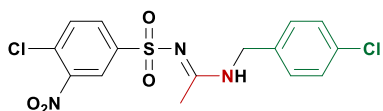

***N'*-((4-chloro-3-nitrophenyl)sulfonyl)-*N*-(4-chlorobenzyl)acetimidamide (4n)**

White solid (47.9 mg, 60% yield, eluent: PE/EA = 1:1.5). mp: 98-100 °C.  $^1\text{H}$  NMR (400 MHz, DMSO- $d_6$ )  $\delta$  9.50 (t,  $J = 5.3$  Hz, 1H), 8.33 – 8.32 (m, 1H), 7.99 – 7.96 (m, 1H), 7.89 – 7.87 (m, 1H), 7.35 – 7.32 (m, 2H), 7.26 – 7.24 (m, 2H), 4.39 (s, 2H), 2.35 (s, 3H).  $^{13}\text{C}$  NMR (100 MHz, DMSO- $d_6$ )  $\delta$  166.3, 147.3, 143.9, 136.2, 132.6, 131.9, 130.6, 129.5, 128.3, 123.0, 44.2, 20.3. **HRMS** (ESI-TOF): Anal Calcd. For.  $\text{C}_{15}\text{H}_{13}\text{Cl}_2\text{N}_3\text{O}_4\text{S}+\text{H}^+$ : 402.0077, found: 402.0068. Anal Calcd. For.  $\text{C}_{15}\text{H}_{13}^{37}\text{Cl}_2\text{N}_3\text{O}_4\text{S}+\text{H}^+$ : 404.0047, found: 404.0033. **IR** (neat,  $\text{cm}^{-1}$ ):  $\nu$  3399, 2971, 1653, 1533, 1358, 1297, 1140, 1049, 783, 623.

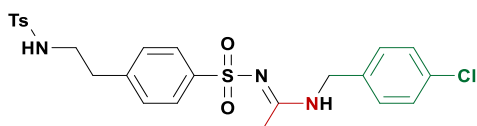

***N*-(4-chlorobenzyl)-*N'*-((4-(2-((4-methylphenyl)sulfonamido)ethyl)phenyl)sulfonyl)acetimidamide (4o)**

White solid (73.8 mg, 71% yield, eluent: PE/EA = 1:2). mp: 95-97 °C. <sup>1</sup>H NMR (400 MHz, DMSO-*d*<sub>6</sub>) δ 9.19 (t, *J* = 5.7 Hz, 1H), 7.67 – 7.66 (m, 1H), 7.66 – 7.64 (m, 2H), 7.61 – 7.59 (m, 2H), 7.38 – 7.35 (m, 4H), 7.28 – 7.25 (m, 4H), 4.36 (d, *J* = 5.5 Hz, 2H), 3.00 – 2.95 (m, 2H), 2.74 (t, *J* = 7.2 Hz, 2H), 2.36 (s, 3H), 2.27 (s, 3H). <sup>13</sup>C NMR (100 MHz, DMSO-*d*<sub>6</sub>) δ 165.7, 142.6, 141.8, 137.4, 136.5, 131.8, 129.63, 129.62, 129.0, 128.3, 126.5, 125.8, 43.9, 43.6, 35.0, 21.0, 19.9. HRMS (ESI-TOF): Anal Calcd. For. C<sub>24</sub>H<sub>26</sub>ClN<sub>3</sub>O<sub>4</sub>S<sub>2</sub>+H<sup>+</sup>: 520.1126, found: 520.1126. Anal Calcd. For. C<sub>24</sub>H<sub>26</sub><sup>37</sup>ClN<sub>3</sub>O<sub>4</sub>S<sub>2</sub>+H<sup>+</sup>: 522.1097, found: 522.1089. IR (neat, cm<sup>-1</sup>): ν 3324, 2963, 1544, 1329, 1286, 1142, 1086, 1012, 802, 755, 658.

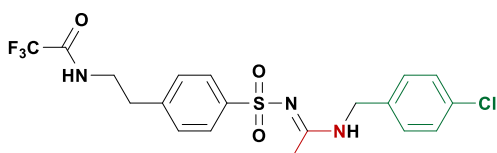

***N*-(4-(*N*-(1-((4-chlorobenzyl)amino)ethylidene)sulfamoyl)phenethyl)-2,2,2-trifluoroacetamide (4p)**

White solid (62.6 mg, 68% yield, eluent: PE/EA = 1:2). mp: 60-62 °C. <sup>1</sup>H NMR (400 MHz, DMSO-*d*<sub>6</sub>) δ 9.50 (t, *J* = 5.7 Hz, 1H), 9.21 (t, *J* = 5.7 Hz, 1H), 7.68 – 7.66 (m, 2H), 7.39 – 7.33 (m, 4H), 7.30 – 7.25 (m, 2H), 4.39 (d, *J* = 5.6 Hz, 2H), 3.48 (q, *J* = 6.9 Hz, 2H), 2.89 (t, *J* = 7.1 Hz, 2H), 2.28 (s, 3H). <sup>13</sup>C NMR (100 MHz, DMSO-*d*<sub>6</sub>) δ 165.9, 156.3 (q, *J* = 36.1 Hz), 142.6, 142.0, 136.5, 132.0, 129.6, 129.1, 128.4, 126.0, 116.0 (q, *J* = 288.2 Hz), 44.0, 40.2, 33.9, 19.9. <sup>19</sup>F NMR (376 MHz, DMSO-*d*<sub>6</sub>) δ -74.52 (s, 3F). HRMS (ESI-TOF): Anal Calcd. For. C<sub>19</sub>H<sub>19</sub>ClF<sub>3</sub>N<sub>3</sub>O<sub>3</sub>S+Na<sup>+</sup>: 484.0680, found: 484.0674. Anal Calcd. For. C<sub>19</sub>H<sub>19</sub><sup>37</sup>ClF<sub>3</sub>N<sub>3</sub>O<sub>3</sub>S+Na<sup>+</sup>: 486.0650, found: 486.0635. IR (neat, cm<sup>-1</sup>): ν 3305, 2945, 1707, 1551, 1280, 1147, 1089, 1010, 804, 658.

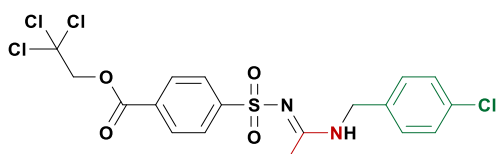

**2,2,2-trichloroethyl-4-(*N*-(1-((4-chlorobenzyl)amino)ethylidene)sulfamoyl)benzoate (4q)**

White solid (87.6 mg, 88% yield, eluent: PE/EA = 1:1). mp: 78-80 °C. <sup>1</sup>H NMR (400 MHz, DMSO-*d*<sub>6</sub>) δ 9.38 (t, *J* = 5.7 Hz, 1H), 8.15 – 8.13 (m, 2H), 7.92 – 7.89 (m, 2H), 7.36 – 7.34 (m, 2H), 7.26 – 7.24 (m, 2H), 5.18 (s, 2H), 4.38 (d, *J* = 5.5 Hz, 2H), 2.31 (s, 3H). <sup>13</sup>C NMR (100 MHz, DMSO-*d*<sub>6</sub>) δ 166.1, 163.3, 148.5, 136.3, 131.8, 130.7, 130.1, 129.6, 128.3, 126.4, 95.1, 73.9, 44.1, 20.1. HRMS (ESI-TOF): Anal Calcd. For. C<sub>18</sub>H<sub>16</sub>Cl<sub>4</sub>N<sub>2</sub>O<sub>4</sub>S+H<sup>+</sup>: 496.9658, found: 496.9657. Anal Calcd. For. C<sub>18</sub>H<sub>16</sub><sup>37</sup>Cl<sub>3</sub>N<sub>2</sub>O<sub>4</sub>S+H<sup>+</sup>: 498.9628, found: 498.9615. IR (neat, cm<sup>-1</sup>): ν 3319, 2963, 1740, 1544, 1258, 1142, 1089, 1016, 762, 692, 620.

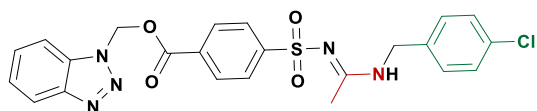

**(1H-benzo[d][1,2,3]triazol-1-yl)methyl-4-(N-(1-((4-chlorobenzyl)amino)ethylidene)sulfamoyl)benzoate (4r)**

White solid (78.3 mg, 79% yield, eluent: PE/EA = 1:2). mp: 115-117 °C. <sup>1</sup>H NMR (400 MHz, DMSO-*d*<sub>6</sub>) δ 9.36 (t, *J* = 5.7 Hz, 1H), 8.13 – 8.09 (m, 2H), 8.08 – 8.03 (m, 2H), 7.82 – 7.80 (m, 2H), 7.69 – 7.65 (m, 1H), 7.49 – 7.46 (m, 1H), 7.31 – 7.29 (m, 2H), 7.22 – 7.20 (m, 2H), 7.00 (s, 2H), 4.34 (d, *J* = 5.6 Hz, 2H), 2.28 (s, 3H). <sup>13</sup>C NMR (100 MHz, DMSO-*d*<sub>6</sub>) δ 166.0, 163.9, 148.3, 145.3, 136.3, 132.8, 131.8, 130.8, 130.1, 129.5, 128.4, 128.3, 126.2, 124.7, 119.4, 111.0, 69.3, 44.1, 20.1. **HRMS** (ESI-TOF): Anal Calcd. For. C<sub>23</sub>H<sub>20</sub>ClN<sub>5</sub>O<sub>4</sub>S+Na<sup>+</sup>: 520.0817, found: 520.0805. Anal Calcd. For. C<sub>23</sub>H<sub>20</sub><sup>37</sup>ClN<sub>5</sub>O<sub>4</sub>S+Na<sup>+</sup>: 522.0787, found: 522.0788. **IR** (neat, cm<sup>-1</sup>): ν 3392, 2974, 1731, 1542, 1262, 1152, 1024, 747, 692.

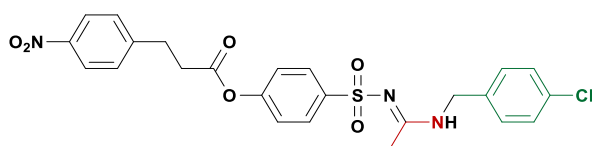

**4-(N-(1-((4-chlorobenzyl)amino)ethylidene)sulfamoyl)phenyl 3-(4-nitrophenyl)propanoate (4s)**

Colorless liquid (65.5 mg, 64% yield, eluent: PE/EA = 1:2). <sup>1</sup>H NMR (400 MHz, DMSO-*d*<sub>6</sub>) δ 9.26 (t, *J* = 5.6 Hz, 1H), 8.20 – 8.16 (m, 2H), 7.78 – 7.74 (m, 2H), 7.62 – 7.58 (m, 2H), 7.38 – 7.35 (m, 2H), 7.27 – 7.23 (m, 2H), 7.23 – 7.20 (m, 2H), 4.36 (d, *J* = 5.6 Hz, 2H), 3.14 – 3.10 (m, 2H), 3.06 – 3.02 (m, 2H), 2.29 (s, 3H). <sup>13</sup>C NMR (100 MHz, DMSO-*d*<sub>6</sub>) δ 170.6, 165.8, 152.4, 148.5, 146.1, 141.3, 136.4, 131.9, 129.72, 129.66, 128.3, 127.5, 123.5, 122.2, 44.0, 34.2, 29.8, 20.0. **HRMS** (ESI-TOF): Anal Calcd. For. C<sub>24</sub>H<sub>22</sub>ClN<sub>3</sub>O<sub>6</sub>S+H<sup>+</sup>: 516.0991, found: 516.0973. Anal Calcd. For. C<sub>24</sub>H<sub>22</sub><sup>37</sup>ClN<sub>3</sub>O<sub>6</sub>S+H<sup>+</sup>: 518.0961, found: 518.0956. **IR** (neat, cm<sup>-1</sup>): ν 3396, 1760, 1653, 1557, 1346, 1146, 1024, 824, 761.

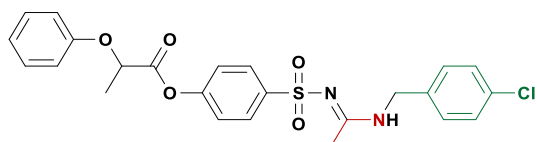

**4-(N-(1-((4-chlorobenzyl)amino)ethylidene)sulfamoyl)phenyl 2-phenoxypropanoate (4t)**

Colorless liquid (89.2 mg, 92% yield, eluent: PE/EA = 1:1.5). <sup>1</sup>H NMR (400 MHz, DMSO-*d*<sub>6</sub>) δ 9.27 (t, *J* = 5.7 Hz, 1H), 7.81 – 7.78 (m, 2H), 7.39 – 7.31 (m, 4H), 7.29 – 7.24 (m, 4H), 7.05 – 7.02 (m, 2H), 7.00 – 6.94 (m, 1H), 5.31 (q, *J* = 6.8 Hz, 1H), 4.37 (d, *J* = 5.6 Hz, 2H), 2.30 (s, 3H), 1.71 (d, *J* = 6.8 Hz, 3H). <sup>13</sup>C NMR (100 MHz, DMSO-*d*<sub>6</sub>) δ 170.2, 165.8, 157.1, 152.0, 141.7, 136.4, 131.9, 129.7, 129.6, 128.3, 127.6, 122.0, 121.5, 115.0, 71.5, 44.0, 20.0, 18.1. **HRMS** (ESI-TOF): Anal Calcd. For. C<sub>24</sub>H<sub>23</sub>ClN<sub>2</sub>O<sub>5</sub>S+Na<sup>+</sup>: 509.0908, found: 509.0906. Anal Calcd. For. C<sub>24</sub>H<sub>23</sub><sup>37</sup>ClN<sub>2</sub>O<sub>5</sub>S+Na<sup>+</sup>: 511.0879, found: 511.0872. **IR** (neat, cm<sup>-1</sup>): ν 3410, 2988, 1772, 1588, 1491, 1146, 1091, 1005, 757, 692.

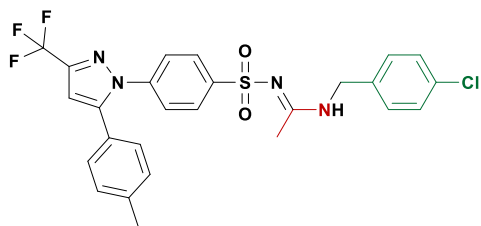

***N*-(4-chlorobenzyl)-*N'*-((4-(5-(*p*-tolyl)-3-(trifluoromethyl)-1*H*-pyrazol-1-yl)phenyl)sulfonyl)acetimidamide (4u)**

White solid (87.5 mg, 80% yield, eluent: PE/EA = 1:1). mp: 100-102 °C. <sup>1</sup>H NMR (400 MHz, DMSO-*d*<sub>6</sub>) δ 9.35 (t, *J* = 5.6 Hz, 1H), 7.79 – 7.75 (m, 2H), 7.49 – 7.45 (m, 2H), 7.35 – 7.31 (m, 2H), 7.25 – 7.23 (m, 2H), 7.22 – 7.20 (m, 4H), 7.17 (s, 1H), 4.36 (d, *J* = 5.5 Hz, 2H), 2.31 (s, 3H), 2.29 (s, 3H). <sup>13</sup>C NMR (100 MHz, DMSO-*d*<sub>6</sub>) δ 165.9, 145.2, 143.7, 142.2 (q, *J* = 37.5 Hz), 140.9, 139.1, 136.4, 131.9, 129.6, 129.4, 128.7, 128.3, 126.9, 125.8, 125.4, 121.3 (q, *J* = 268.9 Hz), 106.0, 44.0, 20.8, 20.0. <sup>19</sup>F NMR (376 MHz, DMSO-*d*<sub>6</sub>) δ -60.91 (s, 3F). HRMS (ESI-TOF): Anal Calcd. For. C<sub>26</sub>H<sub>22</sub>ClF<sub>3</sub>N<sub>4</sub>O<sub>2</sub>S+H<sup>+</sup>: 547.1177, found: 547.1170. Anal Calcd. For. C<sub>26</sub>H<sub>22</sub><sup>37</sup>ClF<sub>3</sub>N<sub>4</sub>O<sub>2</sub>S+H<sup>+</sup>: 549.1147, found: 549.1129. IR (neat, cm<sup>-1</sup>): ν 3303, 2919, 1647, 1559, 1473, 1229, 1135, 1048, 974, 804, 765, 656.

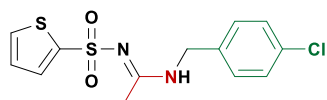

***N*-(4-chlorobenzyl)-*N'*-(thiophen-2-ylsulfonyl)acetimidamide (4v)**

White solid (59.8 mg, 91% yield, eluent: PE/EA = 1:1). mp: 60-62 °C. <sup>1</sup>H NMR (400 MHz, DMSO-*d*<sub>6</sub>) δ 9.35 (t, *J* = 5.7 Hz, 1H), 7.82 – 7.80 (m, 1H), 7.48 – 7.47 (m, 1H), 7.40 – 7.38 (m, 2H), 7.31 – 7.29 (m, 2H), 7.10 – 7.08 (m, 1H), 4.40 (d, *J* = 5.7 Hz, 2H), 2.30 (s, 3H). <sup>13</sup>C NMR (100 MHz, DMSO-*d*<sub>6</sub>) δ 166.1, 145.4, 136.3, 131.9, 131.2, 129.70, 129.66, 128.4, 127.0, 43.9, 19.7. HRMS (ESI-TOF): Anal Calcd. For. C<sub>13</sub>H<sub>13</sub>ClN<sub>2</sub>O<sub>2</sub>S<sub>2</sub>+H<sup>+</sup>: 329.0180, found: 329.0186. Anal Calcd. For. C<sub>13</sub>H<sub>13</sub><sup>37</sup>ClN<sub>2</sub>O<sub>2</sub>S<sub>2</sub>+H<sup>+</sup>: 331.0150, found: 331.0164. IR (neat, cm<sup>-1</sup>): ν 3321, 2967, 1556, 1407, 1261, 1130, 1014, 802, 689.

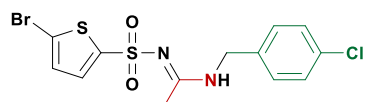

***N'*-((5-bromothiophen-2-yl)sulfonyl)-*N*-(4-chlorobenzyl)acetimidamide (4w)**

White solid (63.2 mg, 78% yield, eluent: PE/EA = 1.5:1). mp: 68-70 °C. <sup>1</sup>H NMR (400 MHz, DMSO-*d*<sub>6</sub>) δ 9.45 (t, *J* = 5.6 Hz, 1H), 7.40 – 7.38 (m, 2H), 7.32 – 7.30 (m, 2H), 7.30 – 7.28 (m, 1H), 7.23 – 7.22 (m, 1H), 4.40 (d, *J* = 5.6 Hz, 2H), 2.31 (s, 3H). <sup>13</sup>C NMR (100 MHz, DMSO-*d*<sub>6</sub>) δ 166.2, 146.5, 136.2, 131.9, 130.6, 130.0, 129.6, 128.4, 116.9, 44.1, 19.9. HRMS (ESI-TOF): Anal Calcd. For. C<sub>13</sub>H<sub>12</sub>BrClN<sub>2</sub>O<sub>2</sub>S<sub>2</sub>+H<sup>+</sup>: 406.9285, found: 406.9277. Anal Calcd. For. C<sub>13</sub>H<sub>12</sub>Br<sup>37</sup>ClN<sub>2</sub>O<sub>2</sub>S<sub>2</sub>+H<sup>+</sup>: 408.9264, found: 408.9262. IR (neat, cm<sup>-1</sup>): ν 3393, 2964, 1648, 1544, 1410, 1286, 1134, 1024, 796, 663.

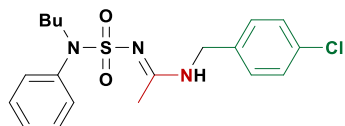

***N'*-(*N*-butyl-*N*-phenylsulfamoyl)-*N*-(4-chlorobenzyl)acetimidamide (4x)**

Yellow solid (59.7 mg, 76% yield, eluent: PE/EA = 1.5:1). mp: 88-90 °C. <sup>1</sup>H NMR (400 MHz, DMSO-*d*<sub>6</sub>) δ 8.97 (t, *J* = 5.8 Hz, 1H), 7.43 – 7.40 (m, 2H), 7.32 – 7.30 (m, 2H), 7.28 – 7.20 (m, 3H), 7.17 – 7.14 (m, 2H), 4.39 (d, *J* = 5.6 Hz, 2H), 3.36 (s, 2H), 2.14 (s, 3H), 1.24 – 1.18 (m, 4H), 0.77 (t, *J* = 6.8 Hz, 3H). <sup>13</sup>C NMR (100 MHz, DMSO-*d*<sub>6</sub>) δ 165.6, 141.4, 137.1, 131.6, 129.2, 128.5, 128.3, 128.0, 126.7, 49.8, 43.7, 29.5, 19.6, 19.2, 13.5. HRMS (ESI-TOF): Anal Calcd. For. C<sub>19</sub>H<sub>24</sub>ClN<sub>3</sub>O<sub>2</sub>S+H<sup>+</sup>: 394.1351, found: 394.1332. Anal Calcd. For. C<sub>19</sub>H<sub>24</sub><sup>37</sup>ClN<sub>3</sub>O<sub>2</sub>S+H<sup>+</sup>: 396.1321, found: 396.1308. IR (neat, cm<sup>-1</sup>): ν 3392, 2958, 2852, 1647, 1556, 1259, 1009, 793, 700, 627.

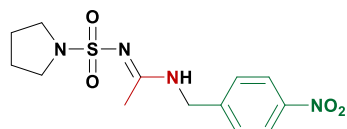

***N*-(4-nitrobenzyl)-*N'*-(pyrrolidin-1-ylsulfonyl)acetimidamide (4y)**

White solid (54.5 mg, 84% yield, eluent: PE/EA = 1:2). mp: 150-152 °C. <sup>1</sup>H NMR (400 MHz, DMSO-*d*<sub>6</sub>) δ 9.00 (t, *J* = 5.8 Hz, 1H), 8.23 – 8.20 (m, 2H), 7.54 – 7.51 (m, 2H), 4.47 (d, *J* = 5.7 Hz, 2H), 2.93 – 2.89 (m, 4H), 2.30 (s, 3H), 1.64 – 1.57 (m, 4H). <sup>13</sup>C NMR (100 MHz, DMSO-*d*<sub>6</sub>) δ 166.0, 146.5, 146.4, 128.2, 123.5, 48.2, 43.9, 24.6, 19.6. HRMS (ESI-TOF): Anal Calcd. For. C<sub>13</sub>H<sub>18</sub>N<sub>4</sub>O<sub>4</sub>S+Na<sup>+</sup>: 349.0941, found: 349.0941. IR (neat, cm<sup>-1</sup>): ν 3354, 2961, 1648, 1516, 1344, 1284, 1130, 1002, 802, 759, 637.

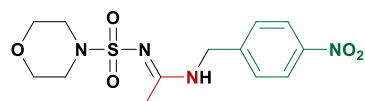

***N'*-(morpholinisulfonyl)-*N*-(4-nitrobenzyl)acetimidamide (4z)**

White solid (39.0 mg, 57% yield, eluent: PE/EA = 1:2). mp: 60-62 °C. <sup>1</sup>H NMR (400 MHz, DMSO-*d*<sub>6</sub>) δ 9.13 (t, *J* = 5.7 Hz, 1H), 8.23 – 8.20 (m, 2H), 7.57 – 7.54 (m, 2H), 4.52 (d, *J* = 5.7 Hz, 2H), 3.54 (t, *J* = 4.8 Hz, 4H), 2.76 (t, *J* = 4.5 Hz, 4H), 2.32 (s, 3H). <sup>13</sup>C NMR (100 MHz, DMSO-*d*<sub>6</sub>) δ 166.1, 146.6, 146.0, 128.4, 123.6, 65.3, 46.3, 43.9, 19.8. HRMS (ESI-TOF): Anal Calcd. For. C<sub>13</sub>H<sub>18</sub>N<sub>4</sub>O<sub>5</sub>S+Na<sup>+</sup>: 365.0890, found: 365.0878. IR (neat, cm<sup>-1</sup>): ν 3392, 2964, 1648, 1557, 1347, 1260, 1024, 946, 800, 736, 635.

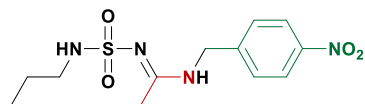

***N*-(4-nitrobenzyl)-*N'*-(*N*-propylsulfamoyl)acetimidamide (4aa)**

White oil (45.4 mg, 72 % yield, eluent: PE/EA = 1:2). <sup>1</sup>H NMR (400 MHz, DMSO-*d*<sub>6</sub>) δ 8.85 (t, *J* = 5.8 Hz, 1H), 8.22 – 8.19 (m, 2H), 7.55 – 7.52 (m, 2H), 6.45 (t, *J* = 6.1 Hz, 1H), 4.48 (d, *J* = 5.8 Hz, 2H), 2.63 – 2.58 (m, 2H), 2.30 (s, 3H), 1.38 – 1.28 (m, 2H), 0.73 (t, *J* = 7.4 Hz, 3H). <sup>13</sup>C NMR (100 MHz, DMSO-*d*<sub>6</sub>) δ 165.2, 146.5, 146.3, 128.4, 123.5, 44.8, 43.6, 22.2, 19.3, 11.3. HRMS (ESI-TOF): Anal Calcd. For. C<sub>12</sub>H<sub>18</sub>N<sub>4</sub>O<sub>4</sub>S+H<sup>+</sup>: 315.1122, found: 315.1123. IR (neat, cm<sup>-1</sup>): ν 3393, 2965, 1647, 1559, 1346, 1135, 1024, 823, 761.

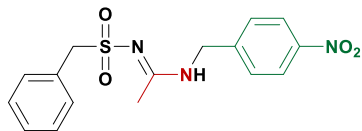

***N'*-(benzylsulfonyl)-*N*-(4-nitrobenzyl)acetimidamide (4ab)**

White solid (62.8 mg, 90% yield, eluent: PE/EA = 1:2). mp: 140-142 °C. <sup>1</sup>H NMR (400 MHz, DMSO-*d*<sub>6</sub>) δ 9.09 (t, *J* = 5.6 Hz, 1H), 8.23 – 8.19 (m, 2H), 7.51 – 7.48 (m, 2H), 7.29 – 7.23 (m, 5H), 4.49 (d, *J* = 5.8 Hz, 2H), 4.21 (s, 2H), 2.15 (s, 3H). <sup>13</sup>C NMR (100 MHz, DMSO-*d*<sub>6</sub>) δ 165.9, 146.6, 145.8, 131.1, 130.9, 128.6, 127.9, 127.6, 123.6, 59.8, 43.7, 19.8. HRMS (ESI-TOF): Anal Calcd. For. C<sub>16</sub>H<sub>17</sub>N<sub>3</sub>O<sub>4</sub>S+Na<sup>+</sup>: 370.0832, found: 370.0824. IR (neat, cm<sup>-1</sup>): ν 3393, 2986, 1653, 1544, 1346, 1281, 1249, 1106, 1025, 797, 699.

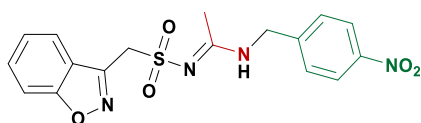

***N'*-(benzo[*d*]isoxazol-3-ylmethylsulfonyl)-*N*-(4-nitrobenzyl)acetimidamide (4ac)**

White solid (65.7 mg, 85% yield, eluent: PE/EA = 1:2). mp: 58-60 °C. <sup>1</sup>H NMR (400 MHz, DMSO-*d*<sub>6</sub>) δ 9.26 (t, *J* = 5.9 Hz, 1H), 8.13 – 8.10 (m, 2H), 7.96 – 7.93 (m, 1H), 7.70 – 7.68 (m, 1H), 7.63 – 7.58 (m, 1H), 7.40 – 7.38 (m, 2H), 7.35 – 7.31 (m, 1H), 4.85 (s, 2H), 4.39 (d, *J* = 5.8 Hz, 2H), 2.29 (s, 3H). <sup>13</sup>C NMR (100 MHz, DMSO-*d*<sub>6</sub>) δ 166.2, 162.5, 151.0, 146.6, 145.2, 130.3, 128.5, 123.7, 123.4, 123.3, 121.0, 109.5, 50.6, 43.8, 20.0. HRMS (ESI-TOF): Anal Calcd. For. C<sub>17</sub>H<sub>16</sub>N<sub>4</sub>O<sub>5</sub>S+Na<sup>+</sup>: 411.0734, found: 411.0736. IR (neat, cm<sup>-1</sup>): ν 3393, 2921, 1647, 1553, 1513, 1347, 1281, 1024, 758, 724, 666.

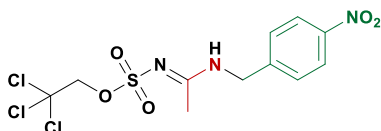

**2,2,2-trichloroethyl-(1-((4-nitrobenzyl)amino)ethylidene)sulfamate (4ad)**

White solid (32.1 mg, 40% yield, eluent: PE/EA = 1:1). mp: 106-108 °C. <sup>1</sup>H NMR (400 MHz, DMSO-*d*<sub>6</sub>) δ 9.82 (t, *J* = 5.7 Hz, 1H), 8.24 – 8.21 (m, 2H), 7.58 – 7.55 (m, 2H), 4.59 (d, *J* = 5.7 Hz, 2H), 4.43 (s, 2H), 2.40 (s, 3H). <sup>13</sup>C NMR (100 MHz, DMSO-*d*<sub>6</sub>) δ 168.3, 146.7, 145.1, 128.6, 123.6, 94.1, 77.4, 44.3, 19.9. HRMS (ESI-TOF): Anal Calcd. For. C<sub>11</sub>H<sub>12</sub>Cl<sub>3</sub>N<sub>3</sub>O<sub>5</sub>S+Na<sup>+</sup>: 425.9455, found: 425.9471. Anal Calcd. For. C<sub>11</sub>H<sub>12</sub><sup>37</sup>ClCl<sub>2</sub>N<sub>3</sub>O<sub>5</sub>S+Na<sup>+</sup>: 427.9426, found: 427.9407. IR (neat, cm<sup>-1</sup>): ν 3353, 2962, 1561, 1327, 1259, 1164, 1012, 870, 770, 629.

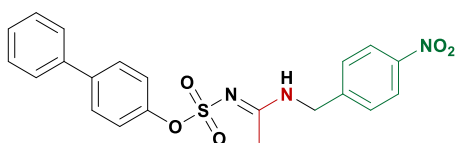

**[1,1'-biphenyl]-4-yl-(1-((4-nitrobenzyl)amino)ethylidene)sulfamate (4ae)**

White solid (64.8 mg, 76% yield, eluent: PE/EA = 1:2). mp: 85-87 °C. <sup>1</sup>H NMR (400 MHz, DMSO-*d*<sub>6</sub>) δ 9.79 (s, 1H), 8.18 – 8.15 (m, 2H), 7.61 – 7.58 (m, 4H), 7.48 – 7.43 (m, 4H), 7.39 – 7.35 (m,



1H), 7.25 – 7.22 (m, 2H), 4.56 (s, 2H), 2.44 (s, 3H). <sup>13</sup>C NMR (100 MHz, DMSO-*d*<sub>6</sub>) δ 168.5, 150.1, 146.7, 145.0, 139.1, 138.1, 129.0, 128.4, 127.7, 127.6, 126.6, 123.6, 122.1, 44.1, 19.9. **HRMS** (ESI-TOF): Anal Calcd. For. C<sub>21</sub>H<sub>19</sub>N<sub>3</sub>O<sub>5</sub>S+H<sup>+</sup>: 426.1118, found: 426.1116. **IR** (neat, cm<sup>-1</sup>): ν 3336, 2963, 1552, 1512, 1411, 1347, 1260, 1142, 1009, 765, 644.

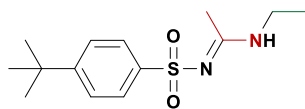

***N'*-((4-(*tert*-butyl)phenyl)sulfonyl)-*N*-ethylacetimidamide (5a)**

Yellow solid (40.5 mg, 72% yield, eluent: PE/EA = 1:1). mp: 113-115 °C. <sup>1</sup>H NMR (400 MHz, DMSO-*d*<sub>6</sub>) δ 8.68 (t, *J* = 4.5 Hz, 1H), 7.73 – 7.69 (m, 2H), 7.55 – 7.52 (m, 2H), 3.20 – 3.13 (m, 2H), 2.20 (s, 3H), 1.28 (s, 9H), 1.06 (t, *J* = 7.2 Hz, 3H). <sup>13</sup>C NMR (100 MHz, DMSO-*d*<sub>6</sub>) δ 165.2, 154.2, 141.3, 125.7, 125.5, 36.0, 34.7, 30.8, 19.9, 13.3. **HRMS** (ESI-TOF): Anal Calcd. For. C<sub>14</sub>H<sub>22</sub>N<sub>2</sub>O<sub>2</sub>S+Na<sup>+</sup>: 305.1294, found: 305.1296. **IR** (neat, cm<sup>-1</sup>): ν 3395, 2961, 1653, 1271, 1143, 1083, 1026, 762, 669.

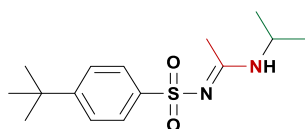

***N'*-((4-(*tert*-butyl)phenyl)sulfonyl)-*N*-isopropylacetimidamide (5b)**

White solid (46.6 mg, 79% yield, eluent: PE/EA = 1:1). mp: 140-142 °C. <sup>1</sup>H NMR (400 MHz, DMSO-*d*<sub>6</sub>) δ 8.55 (d, *J* = 7.4 Hz, 1H), 7.72 – 7.69 (m, 2H), 7.54 – 7.52 (m, 2H), 3.99 – 3.90 (m, 1H), 2.19 (s, 3H), 1.28 (s, 9H), 1.08 (d, *J* = 6.6 Hz, 6H). <sup>13</sup>C NMR (100 MHz, DMSO-*d*<sub>6</sub>) δ 164.4, 154.2, 141.3, 125.6, 125.5, 42.9, 34.6, 30.8, 21.3, 20.0. **HRMS** (ESI-TOF): Anal Calcd. For. C<sub>15</sub>H<sub>24</sub>N<sub>2</sub>O<sub>2</sub>S+H<sup>+</sup>: 297.1631, found: 297.1637. **IR** (neat, cm<sup>-1</sup>): ν 3311, 2965, 1653, 1266, 1166, 1084, 1025, 774, 627.

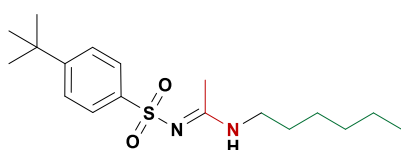

***N'*-((4-(*tert*-butyl)phenyl)sulfonyl)-*N*-hexylacetimidamide (5c)**

White solid (48.2 mg, 71% yield, eluent: PE/EA = 1:1). mp: 51-53 °C. <sup>1</sup>H NMR (400 MHz, DMSO-*d*<sub>6</sub>) δ 8.63 (t, *J* = 5.4 Hz, 1H), 7.72 – 7.70 (m, 2H), 7.53 – 7.51 (m, 2H), 3.17 – 3.12 (m, 2H), 2.22 (s, 3H), 1.47 – 1.40 (m, 2H), 1.27 (s, 9H), 1.24 – 1.17 (m, 6H), 0.82 (t, *J* = 6.5 Hz, 3H). <sup>13</sup>C NMR (100 MHz, DMSO-*d*<sub>6</sub>) δ 165.3, 154.1, 141.3, 125.6, 125.4, 41.1, 34.6, 30.85, 30.79, 27.6, 26.0, 21.9, 19.9, 13.8. **HRMS** (ESI-TOF): Anal Calcd. For. C<sub>18</sub>H<sub>30</sub>N<sub>2</sub>O<sub>2</sub>S+Na<sup>+</sup>: 361.1920, found: 361.1905. **IR** (neat, cm<sup>-1</sup>): ν 3393, 2928, 1653, 1273, 1147, 1024, 765, 646.

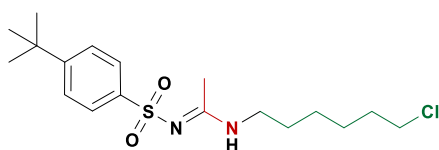

***N'*-((4-(*tert*-butyl)phenyl)sulfonyl)-*N*-(6-chlorohexyl)acetimidamide (5d)**

White solid (54.5 mg, 73% yield, eluent: PE/EA = 1.5:1). mp: 68-70 °C. <sup>1</sup>H NMR (400 MHz, DMSO-*d*<sub>6</sub>) δ 8.64 (t, *J* = 5.4 Hz, 1H), 7.73 – 7.71 (m, 2H), 7.53 – 7.51 (m, 2H), 3.57 (t, *J* = 6.6 Hz, 2H), 3.18 – 3.13 (m, 2H), 2.22 (s, 3H), 1.70 – 1.63 (m, 2H), 1.50 – 1.42 (m, 2H), 1.38 – 1.30 (m, 4H), 1.28 (s, 9H). <sup>13</sup>C NMR (100 MHz, DMSO-*d*<sub>6</sub>) δ 165.4, 154.1, 141.3, 125.6, 125.5, 45.2, 41.0, 34.6, 31.9, 30.8, 27.5, 25.9, 25.5, 19.9. HRMS (ESI-TOF): Anal Calcd. For. C<sub>18</sub>H<sub>29</sub>ClN<sub>2</sub>O<sub>2</sub>S+H<sup>+</sup>: 373.1711, found: 373.1697. Anal Calcd. For. C<sub>18</sub>H<sub>29</sub><sup>37</sup>ClN<sub>2</sub>O<sub>2</sub>S+H<sup>+</sup>: 375.1682, found: 375.1696. IR (neat, cm<sup>-1</sup>): ν 3393, 2959, 1648, 1556, 1431, 1275, 1147, 1025, 762, 640.

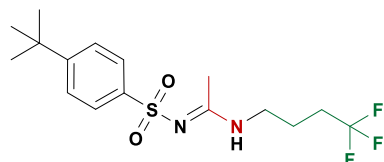

***N'*-((4-(*tert*-butyl)phenyl)sulfonyl)-*N*-(4,4,4-trifluorobutyl)acetimidamide (5e)**

White solid (53.9 mg, 74% yield, eluent: PE/EA = 1:1). mp: 95-97 °C. <sup>1</sup>H NMR (400 MHz, DMSO-*d*<sub>6</sub>) δ 8.71 (t, *J* = 5.5 Hz, 1H), 7.74 – 7.72 (m, 2H), 7.54 – 7.52 (m, 2H), 3.27 – 3.22 (m, 2H), 2.31 – 2.18 (m, 5H), 1.73 – 1.65 (m, 2H), 1.28 (s, 9H). <sup>13</sup>C NMR (100 MHz, DMSO-*d*<sub>6</sub>) δ 165.8, 154.3, 141.2, 127.5 (q, *J* = 276.2 Hz), 125.7, 125.5, 39.9, 34.6, 30.8, 30.2 (q, *J* = 28.0 Hz), 20.5 (d, *J* = 3.3 Hz), 19.9. <sup>19</sup>F NMR (376 MHz, DMSO-*d*<sub>6</sub>) δ -65.00 (s, 3F). HRMS (ESI-TOF): Anal Calcd. For. C<sub>16</sub>H<sub>23</sub>F<sub>3</sub>N<sub>2</sub>O<sub>2</sub>S+Na<sup>+</sup>: 387.1325, found: 387.1334. IR (neat, cm<sup>-1</sup>): ν 3393, 2968, 1648, 1556, 1254, 1128, 1023, 762, 637.

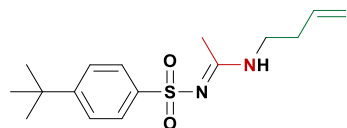

***N*-(but-3-en-1-yl)-*N'*-((4-(*tert*-butyl)phenyl)sulfonyl)acetimidamide (5f)**

White solid (28.2 mg, 46% yield, eluent: PE/EA = 1:1). mp: 92-94 °C. <sup>1</sup>H NMR (400 MHz, DMSO-*d*<sub>6</sub>) δ 8.90 (d, *J* = 6.5 Hz, 1H), 7.71 – 7.68 (m, 2H), 7.55 – 7.52 (m, 2H), 4.26 – 4.16 (m, 1H), 2.22 – 2.14 (m, 5H), 1.96 – 1.85 (m, 2H), 1.70 – 1.60 (m, 2H), 1.28 (s, 9H). <sup>13</sup>C NMR (100 MHz, DMSO-*d*<sub>6</sub>) δ 164.3, 154.2, 141.2, 125.6, 125.5, 45.9, 34.7, 30.8, 29.3, 19.7, 15.0. HRMS (ESI-TOF): Anal Calcd. For. C<sub>16</sub>H<sub>24</sub>N<sub>2</sub>O<sub>2</sub>S+Na<sup>+</sup>: 331.1451, found: 331.1450. IR (neat, cm<sup>-1</sup>): ν 3392, 2963, 1647, 1534, 1273, 1144, 1024, 768, 656.

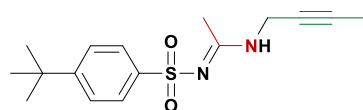

***N*-(but-2-yn-1-yl)-*N'*-((4-(*tert*-butyl)phenyl)sulfonyl)acetimidamide (5g)**

White solid (46.8 mg, 76% yield, eluent: PE/EA = 1.5:1). mp: 160-162 °C. <sup>1</sup>H NMR (400 MHz, Chloroform-*d*) δ 7.82 – 7.80 (m, 2H), 7.45 – 7.43 (m, 2H), 6.69 (t, *J* = 4.6 Hz, 1H), 4.00 – 3.96 (m, 2H), 2.34 (s, 3H), 1.72 (t, *J* = 2.6 Hz, 3H), 1.30 (s, 9H). <sup>13</sup>C NMR (100 MHz, Chloroform-*d*) δ 165.5, 155.2, 140.1, 126.1, 125.5, 80.2, 73.2, 34.9, 32.1, 31.0, 20.6, 3.3. HRMS (ESI-TOF): Anal Calcd. For. C<sub>16</sub>H<sub>22</sub>N<sub>2</sub>O<sub>2</sub>S+Na<sup>+</sup>: 329.1294, found: 329.1291. IR (neat, cm<sup>-1</sup>): ν 3277, 2988, 1575,

1421, 1258, 1143, 1088, 919, 838, 770, 646.

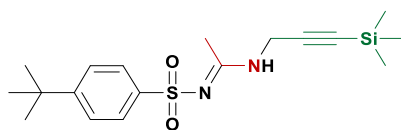

***N'*-((4-(*tert*-butyl)phenyl)sulfonyl)-*N*-(3-(trimethylsilyl)prop-2-yn-1-yl)acetimidamide (5h)**

White solid (43.5 mg, 60% yield, eluent: PE/EA = 2:1). mp: 58-60 °C. <sup>1</sup>H NMR (400 MHz, DMSO-*d*<sub>6</sub>) δ 9.09 (t, *J* = 5.1 Hz, 1H), 7.77 – 7.73 (m, 2H), 7.54 – 7.51 (m, 2H), 4.05 (d, *J* = 5.1 Hz, 2H), 2.24 (s, 3H), 1.28 (s, 9H), 0.13 (s, 9H). <sup>13</sup>C NMR (100 MHz, DMSO-*d*<sub>6</sub>) δ 165.4, 154.3, 140.9, 125.7, 125.5, 101.6, 87.3, 34.6, 31.3, 30.8, 19.7, -0.3. HRMS (ESI-TOF): Anal Calcd. For. C<sub>18</sub>H<sub>28</sub>N<sub>2</sub>O<sub>2</sub>SSi+H<sup>+</sup>: 365.1714, found: 365.1700. IR (neat, cm<sup>-1</sup>): ν 3394, 2961, 1653, 1557, 1249, 1153, 1023, 835, 761, 674.

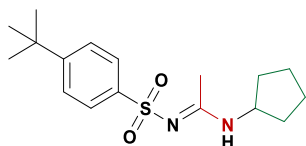

***N'*-((4-(*tert*-butyl)phenyl)sulfonyl)-*N*-cyclopentylacetimidamide (5i)**

White solid (44.9 mg, 70% yield, eluent: PE/EA = 1:1). mp: 110-112 °C. <sup>1</sup>H NMR (400 MHz, DMSO-*d*<sub>6</sub>) δ 8.62 (d, *J* = 6.9 Hz, 1H), 7.73 – 7.71 (m, 2H), 7.54 – 7.52 (m, 2H), 4.12 – 4.04 (m, 1H), 2.20 (s, 3H), 1.88 – 1.80 (m, 2H), 1.64 – 1.59 (m, 2H), 1.50 – 1.38 (m, 4H), 1.27 (s, 9H). <sup>13</sup>C NMR (100 MHz, DMSO-*d*<sub>6</sub>) δ 164.9, 154.1, 141.3, 125.6, 125.5, 52.6, 34.6, 31.6, 30.8, 23.5, 19.9. HRMS (ESI-TOF): Anal Calcd. For. C<sub>17</sub>H<sub>26</sub>N<sub>2</sub>O<sub>2</sub>S+H<sup>+</sup>: 323.1788, found: 323.1789. IR (neat, cm<sup>-1</sup>): ν 3392, 2964, 1663, 1545, 1291, 1143, 1085, 1024, 766, 646.

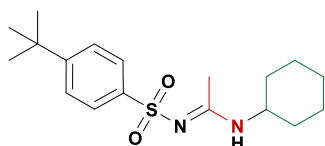

***N'*-((4-(*tert*-butyl)phenyl)sulfonyl)-*N*-cyclohexylacetimidamide (5j)**

White solid (51.2 mg, 76% yield, eluent: PE/EA = 1.5:1). mp: 123-125 °C. <sup>1</sup>H NMR (400 MHz, DMSO-*d*<sub>6</sub>) δ 8.53 (d, *J* = 7.5 Hz, 1H), 7.71 – 7.69 (m, 2H), 7.54 – 7.51 (m, 2H), 3.72 – 3.63 (m, 1H), 2.18 (s, 3H), 1.82 – 1.77 (m, 2H), 1.69 – 1.64 (m, 2H), 1.55 – 1.51 (m, 1H), 1.28 (s, 9H), 1.23 – 1.08 (m, 5H). <sup>13</sup>C NMR (100 MHz, DMSO-*d*<sub>6</sub>) δ 164.6, 154.2, 141.3, 125.61, 125.55, 49.9, 34.6, 31.3, 30.8, 25.0, 24.3, 19.9. HRMS (ESI-TOF): Anal Calcd. For. C<sub>18</sub>H<sub>28</sub>N<sub>2</sub>O<sub>2</sub>S+Na<sup>+</sup>: 359.1764, found: 359.1762. IR (neat, cm<sup>-1</sup>): ν 3393, 2929, 1648, 1548, 1261, 1143, 1025, 830, 765, 669.

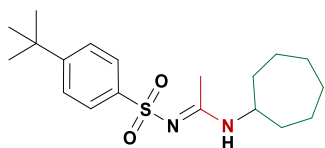

***N'*-((4-(*tert*-butyl)phenyl)sulfonyl)-*N*-cycloheptylacetimidamide (5k)**

White solid (52.6 mg, 75% yield, eluent: PE/EA = 1.5:1). mp: 98-100 °C. <sup>1</sup>H NMR (400 MHz,

DMSO-*d*<sub>6</sub>)  $\delta$  8.57 (d,  $J$  = 7.5 Hz, 1H), 7.71 – 7.69 (m, 2H), 7.54 – 7.52 (m, 2H), 3.90 – 3.82 (m, 1H), 2.18 (s, 3H), 1.84 – 1.78 (m, 2H), 1.61 – 1.55 (m, 2H), 1.51 – 1.35 (m, 8H), 1.28 (s, 9H). <sup>13</sup>C NMR (100 MHz, DMSO-*d*<sub>6</sub>)  $\delta$  164.0, 154.1, 141.4, 125.6, 125.5, 51.9, 34.6, 33.2, 30.8, 27.9, 23.5, 19.9. HRMS (ESI-TOF): Anal Calcd. For. C<sub>19</sub>H<sub>30</sub>N<sub>2</sub>O<sub>2</sub>S+Na<sup>+</sup>: 373.1920, found: 373.1920. IR (neat, cm<sup>-1</sup>):  $\nu$  3392, 2962, 1653, 1542, 1266, 1085, 1024, 766, 669.

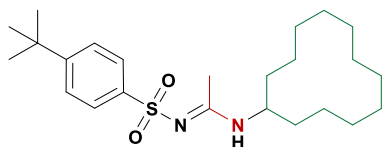

***N'*-((4-(*tert*-butyl)phenyl)sulfonyl)-*N*-cyclododecylacetimidamide (5l)**

White solid (48.3 mg, 57% yield, eluent: PE/EA = 1.5:1). mp: 105-107 °C. <sup>1</sup>H NMR (400 MHz, DMSO-*d*<sub>6</sub>)  $\delta$  8.43 (d,  $J$  = 8.1 Hz, 1H), 7.71 – 7.65 (m, 2H), 7.53 – 7.46 (m, 2H), 4.01 – 3.93 (m, 1H), 2.27 (s, 3H), 1.55 – 1.48 (m, 2H), 1.28 (s, 9H), 1.23 – 1.04 (m, 20H). <sup>13</sup>C NMR (100 MHz, DMSO-*d*<sub>6</sub>)  $\delta$  164.1, 153.9, 141.5, 125.5, 125.2, 46.2, 34.6, 30.8, 29.5, 23.6, 23.1, 22.5, 22.1, 21.4, 20.1. HRMS (ESI-TOF): Anal Calcd. For. C<sub>24</sub>H<sub>40</sub>N<sub>2</sub>O<sub>2</sub>S+Na<sup>+</sup>: 443.2703, found: 443.2703. IR (neat, cm<sup>-1</sup>):  $\nu$  3393, 2931, 1648, 1558, 1259, 1146, 1024, 765, 672.

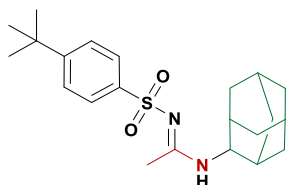

***N*-(adamantan-2-yl)-*N'*-((4-(*tert*-butyl)phenyl)sulfonyl)acetimidamide (5m)**

White solid (46.6 mg, 60% yield, eluent: PE/EA = 1.5:1). mp: 193-195 °C. <sup>1</sup>H NMR (400 MHz, DMSO-*d*<sub>6</sub>)  $\delta$  8.31 (d,  $J$  = 7.0 Hz, 1H), 7.73 – 7.68 (m, 2H), 7.58 – 7.52 (m, 2H), 3.97 – 3.95 (m, 1H), 2.29 (s, 3H), 1.98 – 1.93 (m, 4H), 1.80 – 1.77 (m, 4H), 1.73 – 1.68 (m, 4H), 1.53 – 1.48 (m, 2H), 1.28 (s, 9H). <sup>13</sup>C NMR (100 MHz, DMSO-*d*<sub>6</sub>)  $\delta$  165.3, 154.2, 141.3, 125.6, 125.5, 55.7, 36.9, 36.6, 34.7, 30.9, 30.8, 30.5, 26.63, 26.56, 19.8. HRMS (ESI-TOF): Anal Calcd. For. C<sub>22</sub>H<sub>32</sub>N<sub>2</sub>O<sub>2</sub>S+H<sup>+</sup>: 389.2257, found: 389.2248. IR (neat, cm<sup>-1</sup>):  $\nu$  3392, 2913, 1648, 1543, 1441, 1276, 1147, 1024, 824, 764, 620.

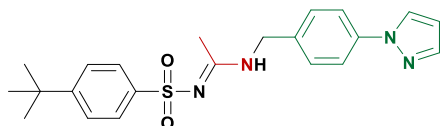

***N*-(4-(1*H*-pyrazol-1-yl)benzyl)-*N'*-((4-(*tert*-butyl)phenyl)sulfonyl)acetimidamide (5n)**

White solid (66.0 mg, 80% yield, eluent: PE/EA = 1:2). mp: 98-100 °C. <sup>1</sup>H NMR (400 MHz, DMSO-*d*<sub>6</sub>)  $\delta$  9.19 (t,  $J$  = 5.7 Hz, 1H), 8.46 (s, 1H), 7.80 – 7.78 (m, 2H), 7.73 (s, 1H), 7.65 – 7.63 (m, 2H), 7.49 – 7.47 (m, 2H), 7.37 – 7.35 (m, 2H), 6.53 (s, 1H), 4.41 (d,  $J$  = 5.6 Hz, 2H), 2.29 (s, 3H), 1.25 (s, 9H). <sup>13</sup>C NMR (100 MHz, DMSO-*d*<sub>6</sub>)  $\delta$  165.7, 154.4, 141.1, 141.0, 138.9, 135.4, 129.0, 127.7, 125.7, 125.6, 118.4, 107.9, 44.2, 34.7, 30.9, 20.0. HRMS (ESI-TOF): Anal Calcd. For. C<sub>22</sub>H<sub>26</sub>N<sub>4</sub>O<sub>2</sub>S+Na<sup>+</sup>: 433.1669, found: 433.1668. IR (neat, cm<sup>-1</sup>):  $\nu$  3394, 2961, 1653, 1544, 1396, 1271, 1151, 1085, 1024, 771, 630.

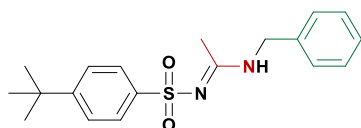

***N*-benzyl-*N'*-((4-(*tert*-butyl)phenyl)sulfonyl)acetimidamide (5o)**

White solid (52.6 mg, 76% yield, eluent: PE/EA = 1:1). mp: 73-75 °C. <sup>1</sup>H NMR (400 MHz, DMSO-*d*<sub>6</sub>) δ 9.15 (t, *J* = 4.7 Hz, 1H), 7.70 – 7.68 (m, 2H), 7.53 – 7.51 (m, 2H), 7.34 – 7.31 (m, 2H), 7.28 – 7.25 (m, 3H), 4.39 (d, *J* = 5.5 Hz, 2H), 2.29 (s, 3H), 1.29 (s, 9H). <sup>13</sup>C NMR (100 MHz, DMSO-*d*<sub>6</sub>) δ 165.6, 154.3, 141.1, 137.3, 128.4, 127.8, 127.2, 125.7, 125.5, 44.6, 34.7, 30.8, 19.9. HRMS (ESI-TOF): Anal Calcd. For. C<sub>19</sub>H<sub>24</sub>N<sub>2</sub>O<sub>2</sub>S+H<sup>+</sup>: 345.1631, found: 345.1633. IR (neat, cm<sup>-1</sup>): ν 3395, 1653, 1274, 1153, 1024, 767, 645.

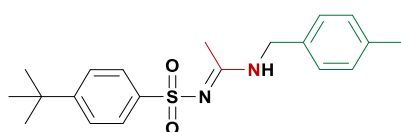

***N'*-((4-(*tert*-butyl)phenyl)sulfonyl)-*N*-(4-methylbenzyl)acetimidamide (5p)**

White solid (41.3 mg, 58% yield, eluent: PE/EA = 1:1). mp: 68-70 °C. <sup>1</sup>H NMR (400 MHz, DMSO-*d*<sub>6</sub>) δ 9.10 (t, *J* = 5.7 Hz, 1H), 7.68 – 7.65 (m, 2H), 7.53 – 7.50 (m, 2H), 7.15 – 7.10 (m, 4H), 4.33 (d, *J* = 5.5 Hz, 2H), 2.27 (s, 3H), 2.26 (s, 3H), 1.29 (s, 9H). <sup>13</sup>C NMR (100 MHz, DMSO-*d*<sub>6</sub>) δ 165.5, 154.3, 141.1, 136.4, 134.3, 128.9, 127.8, 125.6, 125.5, 44.4, 34.7, 30.8, 20.7, 19.9. HRMS (ESI-TOF): Anal Calcd. For. C<sub>20</sub>H<sub>26</sub>N<sub>2</sub>O<sub>2</sub>S+H<sup>+</sup>: 359.1788, found: 359.1782. IR (neat, cm<sup>-1</sup>): ν 3388, 2922, 1653, 1261, 1146, 1023, 763, 665.

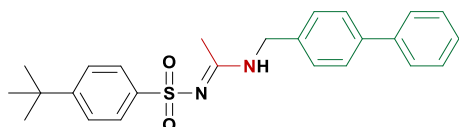

***N*-([1,1'-biphenyl]-4-ylmethyl)-*N'*-((4-(*tert*-butyl)phenyl)sulfonyl)acetimidamide (5q)**

White solid (39.2 mg, 47% yield, eluent: PE/EA = 1.5:1). mp: 83-85 °C. <sup>1</sup>H NMR (400 MHz, DMSO-*d*<sub>6</sub>) δ 9.21 (t, *J* = 5.7 Hz, 1H), 7.69 – 7.67 (m, 2H), 7.66 – 7.62 (m, 2H), 7.62 – 7.58 (m, 2H), 7.51 – 7.48 (m, 2H), 7.47 – 7.44 (m, 2H), 7.38 – 7.34 (m, 3H), 4.43 (d, *J* = 5.6 Hz, 2H), 2.31 (s, 3H), 1.25 (s, 9H). <sup>13</sup>C NMR (100 MHz, DMSO-*d*<sub>6</sub>) δ 165.6, 154.3, 141.1, 139.8, 139.2, 136.6, 128.9, 128.5, 127.4, 126.7, 126.6, 125.7, 125.5, 44.4, 34.6, 30.8, 20.0. HRMS (ESI-TOF): Anal Calcd. For. C<sub>25</sub>H<sub>28</sub>N<sub>2</sub>O<sub>2</sub>S+H<sup>+</sup>: 421.1944, found: 421.1939. IR (neat, cm<sup>-1</sup>): ν 3393, 2963, 1653, 1543, 1276, 1149, 1024, 764, 627.

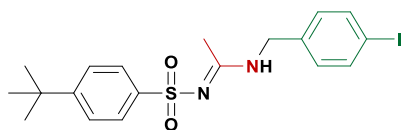

***N'*-((4-(*tert*-butyl)phenyl)sulfonyl)-*N*-(4-iodobenzyl)acetimidamide (5r)**

White solid (75.9 mg, 81% yield, eluent: PE/EA = 1:1.5). mp: 94-96 °C. <sup>1</sup>H NMR (400 MHz,

DMSO-*d*<sub>6</sub>)  $\delta$  9.17 (t, *J* = 5.6 Hz, 1H), 7.67 – 7.65 (m, 2H), 7.63 – 7.61 (m, 2H), 7.51 – 7.48 (m, 2H), 7.07 – 7.05 (m, 2H), 4.33 (d, *J* = 5.6 Hz, 2H), 2.29 (s, 3H), 1.28 (s, 9H). <sup>13</sup>C NMR (100 MHz, DMSO-*d*<sub>6</sub>)  $\delta$  165.6, 154.2, 141.0, 137.3, 137.1, 130.1, 125.6, 125.5, 93.0, 44.1, 34.6, 30.8, 19.9. **HRMS** (ESI-TOF): Anal Calcd. For. C<sub>19</sub>H<sub>23</sub>IN<sub>2</sub>O<sub>2</sub>S+Na<sup>+</sup>: 493.0417, found: 493.0409. **IR** (neat, cm<sup>-1</sup>):  $\nu$  3273, 2961, 1647, 1543, 1421, 1261, 1150, 1084, 1003, 794, 635.

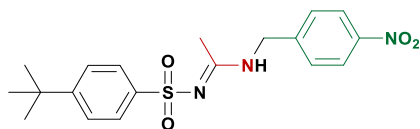

***N'*-((4-(*tert*-butyl)phenyl)sulfonyl)-*N*-(4-nitrobenzyl)acetimidamide (5s)**

White solid (74.2 mg, 95% yield, eluent: PE/EA = 1:1.5). mp: 121-123 °C. <sup>1</sup>H NMR (400 MHz, Chloroform-*d*)  $\delta$  7.98 – 7.95 (m, 2H), 7.60 (t, *J* = 5.5 Hz, 1H), 7.58 – 7.56 (m, 2H), 7.39 – 7.37 (m, 2H), 7.30 – 7.27 (m, 2H), 4.46 (d, *J* = 5.8 Hz, 2H), 2.30 (s, 3H), 1.30 (s, 9H). <sup>13</sup>C NMR (100 MHz, Chloroform-*d*)  $\delta$  166.4, 155.7, 147.0, 144.3, 139.6, 128.6, 125.8, 125.6, 123.4, 44.8, 34.9, 30.9, 20.5. **HRMS** (ESI-TOF): Anal Calcd. For. C<sub>19</sub>H<sub>23</sub>N<sub>3</sub>O<sub>4</sub>S+H<sup>+</sup>: 390.1482, found: 390.1476. **IR** (neat, cm<sup>-1</sup>):  $\nu$  3307, 2987, 1684, 1542, 1348, 1257, 1145, 1067, 764, 669.

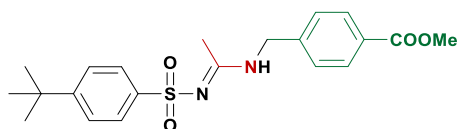

**methyl 4-((*N'*-((4-(*tert*-butyl)phenyl)sulfonyl)acetimidamido)methyl)benzoate (5t)**

White solid (73.4 mg, 91% yield, eluent: PE/EA = 1:1.5). mp: 97-99 °C. <sup>1</sup>H NMR (400 MHz, DMSO-*d*<sub>6</sub>)  $\delta$  9.24 (t, *J* = 4.9 Hz, 1H), 7.90 – 7.88 (m, 2H), 7.61 – 7.59 (m, 2H), 7.48 – 7.46 (m, 2H), 7.37 – 7.35 (m, 2H), 4.46 (d, *J* = 5.6 Hz, 2H), 3.84 (s, 3H), 2.32 (s, 3H), 1.27 (s, 9H). <sup>13</sup>C NMR (100 MHz, DMSO-*d*<sub>6</sub>)  $\delta$  166.0, 165.8, 154.3, 143.1, 141.0, 129.2, 128.4, 127.8, 125.6, 125.5, 52.1, 44.3, 34.6, 30.8, 19.9. **HRMS** (ESI-TOF): Anal Calcd. For. C<sub>21</sub>H<sub>26</sub>N<sub>2</sub>O<sub>4</sub>S+H<sup>+</sup>: 403.1686, found: 403.1684. **IR** (neat, cm<sup>-1</sup>):  $\nu$  3392, 2958, 1717, 1557, 1418, 1262, 1149, 1022, 754, 640.

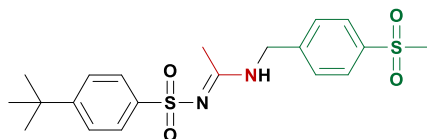

***N'*-((4-(*tert*-butyl)phenyl)sulfonyl)-*N*-(4-(methylsulfonyl)benzyl)acetimidamide (5u)**

White solid (76.4 mg, 90% yield, eluent: PE/EA = 1:2). mp: 167-169 °C. <sup>1</sup>H NMR (400 MHz, Chloroform-*d*)  $\delta$  7.69 – 7.67 (m, 2H), 7.66 – 7.64 (m, 2H), 7.46 (t, *J* = 5.3 Hz, 1H), 7.43 – 7.41 (m, 2H), 7.35 – 7.33 (m, 2H), 4.48 (d, *J* = 5.7 Hz, 2H), 2.98 (s, 3H), 2.31 (s, 3H), 1.30 (s, 9H). <sup>13</sup>C NMR (100 MHz, Chloroform-*d*)  $\delta$  166.4, 155.5, 143.3, 139.8, 139.1, 128.8, 127.3, 125.9, 125.6, 44.9, 44.4, 34.9, 31.0, 20.6. **HRMS** (ESI-TOF): Anal Calcd. For. C<sub>20</sub>H<sub>26</sub>N<sub>2</sub>O<sub>4</sub>S<sub>2</sub>+H<sup>+</sup>: 423.1407, found: 423.1403. **IR** (neat, cm<sup>-1</sup>):  $\nu$  3291, 2971, 1591, 1275, 1147, 1084, 760, 636.

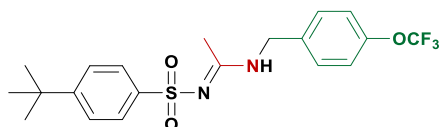

***N'*-((4-(*tert*-butyl)phenyl)sulfonyl)-*N*-(4-(trifluoromethoxy)benzyl)acetimidamide (5v)**

White solid (57.6 mg, 67% yield, eluent: PE/EA = 1:1). mp: 85-87 °C.  $^1\text{H NMR}$  (400 MHz, DMSO- $d_6$ )  $\delta$  9.20 (t,  $J$  = 4.8 Hz, 1H), 7.67 – 7.64 (m, 2H), 7.51 – 7.48 (m, 2H), 7.39 – 7.37 (m, 2H), 7.32 – 7.28 (m, 2H), 4.41 (d,  $J$  = 5.3 Hz, 2H), 2.31 (s, 3H), 1.27 (s, 9H).  $^{13}\text{C NMR}$  (100 MHz, DMSO- $d_6$ )  $\delta$  165.7, 154.3, 147.5, 141.1, 137.0, 129.7, 125.7, 125.5, 120.9, 120.1 (q,  $J$  = 256.1 Hz), 43.9, 34.6, 30.8, 19.9.  $^{19}\text{F NMR}$  (376 MHz, DMSO- $d_6$ )  $\delta$  -57.01 (s, 3F). **HRMS** (ESI-TOF): Anal Calcd. For.  $\text{C}_{20}\text{H}_{23}\text{F}_3\text{N}_2\text{O}_3\text{S}+\text{H}^+$ : 429.1454, found: 429.1456. **IR** (neat,  $\text{cm}^{-1}$ ):  $\nu$  3278, 2969, 1647, 1558, 1421, 1250, 1151, 1084, 1013, 763, 644.

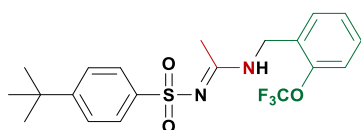

***N'*-((4-(*tert*-butyl)phenyl)sulfonyl)-*N*-(2-(trifluoromethoxy)benzyl)acetimidamide (5w)**

White solid (73.7 mg, 86% yield, eluent: PE/EA = 1:1). mp: 63-65 °C.  $^1\text{H NMR}$  (400 MHz, DMSO- $d_6$ )  $\delta$  9.15 (t,  $J$  = 5.5 Hz, 1H), 7.68 – 7.65 (m, 2H), 7.51 – 7.48 (m, 2H), 7.44 – 7.42 (m, 1H), 7.41 – 7.39 (m, 1H), 7.36 – 7.34 (m, 1H), 7.34 – 7.28 (m, 1H), 4.46 (d,  $J$  = 5.4 Hz, 2H), 2.33 (s, 3H), 1.27 (s, 9H).  $^{13}\text{C NMR}$  (100 MHz, DMSO- $d_6$ )  $\delta$  165.8, 154.3, 146.5 (d,  $J$  = 1.8 Hz), 141.0, 130.2, 129.7, 129.3, 127.4, 125.6, 125.4, 120.5, 120.2 (q,  $J$  = 257.0 Hz), 39.4, 34.6, 30.8, 19.8.  $^{19}\text{F NMR}$  (376 MHz, DMSO- $d_6$ )  $\delta$  -56.32 (s, 3F). **HRMS** (ESI-TOF): Anal Calcd. For.  $\text{C}_{20}\text{H}_{23}\text{F}_3\text{N}_2\text{O}_3\text{S}+\text{H}^+$ : 429.1454, found: 429.1454. **IR** (neat,  $\text{cm}^{-1}$ ):  $\nu$  3331, 2967, 1553, 1423, 1247, 1166, 1025, 836, 762, 667.

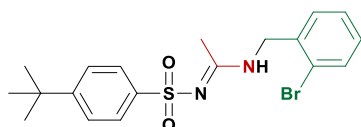

***N*-(2-bromobenzyl)-*N'*-((4-(*tert*-butyl)phenyl)sulfonyl)acetimidamide (5x)**

White solid (64.6 mg, 77% yield, eluent: PE/EA = 2:1). mp: 69-71 °C.  $^1\text{H NMR}$  (400 MHz, DMSO- $d_6$ )  $\delta$  9.12 (t,  $J$  = 5.3 Hz, 1H), 7.68 – 7.65 (m, 2H), 7.63 – 7.60 (m, 1H), 7.53 – 7.50 (m, 2H), 7.38 – 7.30 (m, 2H), 7.26 – 7.22 (m, 1H), 4.43 (d,  $J$  = 5.1 Hz, 2H), 2.31 (s, 3H), 1.28 (s, 9H).  $^{13}\text{C NMR}$  (100 MHz, DMSO- $d_6$ )  $\delta$  165.9, 154.4, 140.9, 135.9, 132.5, 130.0, 129.5, 127.7, 125.7, 125.5, 123.0, 45.1, 34.7, 30.8, 19.7. **HRMS** (ESI-TOF): Anal Calcd. For.  $\text{C}_{19}\text{H}_{23}\text{BrN}_2\text{O}_2\text{S}+\text{Na}^+$ : 445.0556, found: 445.0546. Anal Calcd. For.  $\text{C}_{19}\text{H}_{23}^{81}\text{BrN}_2\text{O}_2\text{S}+\text{Na}^+$ : 447.0535, found: 447.0540. **IR** (neat,  $\text{cm}^{-1}$ ):  $\nu$  3275, 2961, 1648, 1268, 1150, 1025, 764, 645.

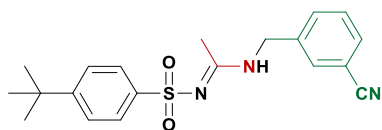

***N'*-((4-(*tert*-butyl)phenyl)sulfonyl)-*N*-(3-cyanobenzyl)acetimidamide (5y)**

White solid (62.1 mg, 84% yield, eluent: PE/EA = 1:2). mp: 48-50 °C. <sup>1</sup>H NMR (400 MHz, DMSO-*d*<sub>6</sub>) δ 9.22 (t, *J* = 5.7 Hz, 1H), 7.74 – 7.72 (m, 1H), 7.674 – 7.665 (m, 1H), 7.63 – 7.60 (m, 2H), 7.59 – 7.57 (m, 1H), 7.54 – 7.52 (m, 1H), 7.51 – 7.49 (m, 2H), 4.42 (d, *J* = 5.6 Hz, 2H), 2.30 (s, 3H), 1.28 (s, 9H). <sup>13</sup>C NMR (100 MHz, DMSO-*d*<sub>6</sub>) δ 165.9, 154.4, 140.9, 139.3, 132.6, 131.2, 131.0, 129.6, 125.6, 125.5, 118.7, 111.3, 43.9, 34.7, 30.8, 19.9. HRMS (ESI-TOF): Anal Calcd. For. C<sub>20</sub>H<sub>23</sub>N<sub>3</sub>O<sub>2</sub>S+Na<sup>+</sup>: 392.1403, found: 392.1396. IR (neat, cm<sup>-1</sup>): ν 3269, 2967, 2229, 1554, 1419, 1271, 1149, 1084, 1024, 762, 644.

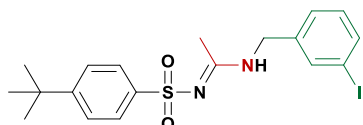

***N'*-((4-(*tert*-butyl)phenyl)sulfonyl)-*N*-(3-iodobenzyl)acetimidamide (5z)**

White oil (81.1 mg, 86% yield, eluent: PE/EA = 1:1.5). <sup>1</sup>H NMR (400 MHz, DMSO-*d*<sub>6</sub>) δ 9.16 (t, *J* = 5.7 Hz, 1H), 7.68 – 7.65 (m, 2H), 7.64 – 7.62 (m, 2H), 7.54 – 7.50 (m, 2H), 7.28 – 7.26 (m, 1H), 7.14 – 7.10 (m, 1H), 4.35 (d, *J* = 5.6 Hz, 2H), 2.29 (s, 3H), 1.28 (s, 9H). <sup>13</sup>C NMR (100 MHz, DMSO-*d*<sub>6</sub>) δ 165.7, 154.3, 141.0, 140.2, 136.4, 135.9, 130.5, 127.2, 125.61, 125.55, 94.8, 43.9, 34.7, 30.9, 19.9. HRMS (ESI-TOF): Anal Calcd. For. C<sub>19</sub>H<sub>23</sub>IN<sub>2</sub>O<sub>2</sub>S+H<sup>+</sup>: 471.0598, found: 471.0596. IR (neat, cm<sup>-1</sup>): ν 3263, 2962, 1547, 1421, 1269, 1148, 1086, 1024, 761, 665.

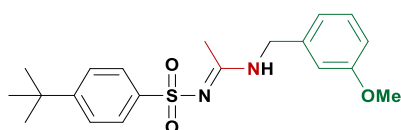

***N'*-((4-(*tert*-butyl)phenyl)sulfonyl)-*N*-(3-methoxybenzyl)acetimidamide (5aa)**

Colorless liquid (43.0 mg, 57% yield, eluent: PE/EA = 1:1). <sup>1</sup>H NMR (400 MHz, DMSO-*d*<sub>6</sub>) δ 9.14 (t, *J* = 5.7 Hz, 1H), 7.70 – 7.67 (m, 2H), 7.53 – 7.49 (m, 2H), 7.26 – 7.22 (m, 1H), 6.86 – 6.83 (m, 3H), 4.37 (d, *J* = 5.6 Hz, 2H), 3.70 (s, 3H), 2.30 (s, 3H), 1.28 (s, 9H). <sup>13</sup>C NMR (100 MHz, DMSO-*d*<sub>6</sub>) δ 165.6, 159.3, 154.3, 141.1, 138.9, 129.5, 125.7, 125.5, 119.9, 113.4, 112.8, 54.9, 44.6, 34.7, 30.8, 19.9. HRMS (ESI-TOF): Anal Calcd. For. C<sub>20</sub>H<sub>26</sub>N<sub>2</sub>O<sub>3</sub>S+Na<sup>+</sup>: 397.1556, found: 397.1552. IR (neat, cm<sup>-1</sup>): ν 3393, 2963, 1648, 1570, 1260, 1143, 1082, 1023, 768, 656.

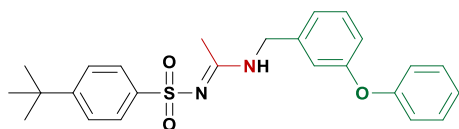

***N'*-((4-(*tert*-butyl)phenyl)sulfonyl)-*N*-(3-phenoxybenzyl)acetimidamide (5ab)**

Colorless oil (60.1 mg, 69% yield, eluent: PE/EA = 1:1). <sup>1</sup>H NMR (400 MHz, DMSO-*d*<sub>6</sub>) δ 9.18 (t, *J* = 5.7 Hz, 1H), 7.67 – 7.63 (m, 2H), 7.49 – 7.45 (m, 2H), 7.39 – 7.31 (m, 3H), 7.15 – 7.11 (m, 1H), 7.06 – 7.03 (m, 1H), 6.99 – 6.94 (m, 3H), 6.91 – 6.88 (m, 1H), 4.39 (d, *J* = 5.7 Hz, 2H), 2.28 (s, 3H), 1.26 (s, 9H). <sup>13</sup>C NMR (100 MHz, DMSO-*d*<sub>6</sub>) δ 165.7, 156.6, 156.5, 154.3, 141.0, 139.8, 130.01, 129.99, 125.6, 125.5, 123.4, 122.8, 118.5, 117.9, 117.3, 44.3, 34.6, 30.8, 19.9. HRMS (ESI-TOF): Anal Calcd. For. C<sub>25</sub>H<sub>28</sub>N<sub>2</sub>O<sub>3</sub>S+H<sup>+</sup>: 437.1893, found: 437.1891. IR (neat, cm<sup>-1</sup>): ν 3255, 2964,



1549, 1487, 1251, 1148, 1087, 1024, 761, 666.

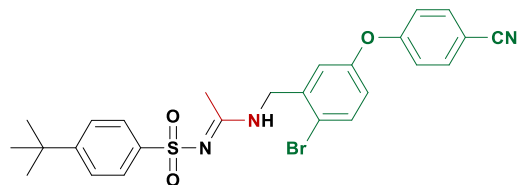

***N*-(2-bromo-5-(4-cyanophenoxy)benzyl)-*N'*-((4-*tert*-butyl)phenyl)sulfonylacetimidamide (5ac)**

White solid (94.9 mg, 88% yield, eluent: PE/EA = 1:1). mp: 53-55 °C. <sup>1</sup>H NMR (400 MHz, Chloroform-*d*) δ 7.63 – 7.61 (m, 2H), 7.55 – 7.53 (m, 2H), 7.49 – 7.47 (m, 1H), 7.34 – 7.32 (m, 2H), 7.18 (t, *J* = 5.6 Hz, 1H), 6.983 – 6.976 (m, 1H), 6.95 – 6.93 (m, 2H), 6.80 (dd, *J* = 8.6, 2.9 Hz, 1H), 4.45 (d, *J* = 5.7 Hz, 2H), 2.30 (s, 3H), 1.27 (s, 9H). <sup>13</sup>C NMR (100 MHz, Chloroform-*d*) δ 166.3, 160.7, 155.3, 153.9, 139.8, 137.9, 134.2, 134.1, 125.8, 125.4, 121.9, 120.8, 118.7, 118.5, 117.9, 106.0, 45.8, 34.8, 31.0, 20.5. HRMS (ESI-TOF): Anal Calcd. For. C<sub>26</sub>H<sub>26</sub>BrN<sub>3</sub>O<sub>3</sub>S+H<sup>+</sup>: 540.0951, found: 540.0951. Anal Calcd. For. C<sub>26</sub>H<sub>26</sub><sup>81</sup>BrN<sub>3</sub>O<sub>3</sub>S+H<sup>+</sup>: 542.0931, found: 542.0926. IR (neat, cm<sup>-1</sup>): ν 3298, 2964, 2227, 1734, 1548, 1239, 1146, 1085, 837, 761, 665.

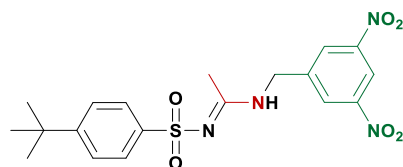

***N'*-((4-*tert*-butyl)phenyl)sulfonyl)-*N*-(3,5-dinitrobenzyl)acetimidamide (5ad)**

White solid (75.0 mg, 86% yield, eluent: PE/EA = 1:2). mp: 96-98 °C. <sup>1</sup>H NMR (400 MHz, DMSO-*d*<sub>6</sub>) δ 9.36 (s, 1H), 8.69 (t, *J* = 2.1 Hz, 1H), 8.472 – 8.467 (m, 2H), 7.55 – 7.52 (m, 2H), 7.43 – 7.40 (m, 2H), 4.61 (s, 2H), 2.34 (s, 3H), 1.27 (s, 9H). <sup>13</sup>C NMR (100 MHz, DMSO-*d*<sub>6</sub>) δ 166.0, 154.4, 147.8, 142.6, 140.6, 128.1, 125.5, 125.3, 117.2, 43.6, 34.6, 30.7, 19.9. HRMS (ESI-TOF): Anal Calcd. For. C<sub>19</sub>H<sub>22</sub>N<sub>4</sub>O<sub>6</sub>S+H<sup>+</sup>: 435.1333, found: 435.1322. IR (neat, cm<sup>-1</sup>): ν 3392, 2965, 1634, 1539, 1427, 1341, 1262, 1148, 1087, 1024, 759, 655.

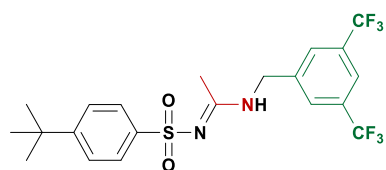

***N*-(3,5-bis(trifluoromethyl)benzyl)-*N'*-((4-*tert*-butyl)phenyl)sulfonylacetimidamide (5ae)**

White solid (84.9 mg, 88% yield, eluent: PE/EA = 1.5:1). mp: 73-75 °C. <sup>1</sup>H NMR (400 MHz, DMSO-*d*<sub>6</sub>) δ 9.28 (t, *J* = 5.7 Hz, 1H), 7.95 – 7.92 (m, 3H), 7.63 – 7.61 (m, 2H), 7.46 – 7.44 (m, 2H), 4.58 (d, *J* = 5.6 Hz, 2H), 2.36 (s, 3H), 1.25 (s, 9H). <sup>13</sup>C NMR (100 MHz, DMSO-*d*<sub>6</sub>) δ 166.0, 154.3, 141.4, 140.9, 130.3 (q, *J* = 32.9 Hz), 128.6, 125.6, 125.3, 123.3 (q, *J* = 272.4 Hz), 120.7, 43.9, 34.5, 30.6, 19.9. <sup>19</sup>F NMR (376 MHz, DMSO-*d*<sub>6</sub>) δ -61.75 (s, 6F). HRMS (ESI-TOF): Anal Calcd. For. C<sub>21</sub>H<sub>22</sub>F<sub>6</sub>N<sub>2</sub>O<sub>2</sub>S+Na<sup>+</sup>: 503.1198, found: 503.1187. IR (neat, cm<sup>-1</sup>): ν 3393, 2967, 1653, 1558, 1276, 1171, 1024, 762, 679.

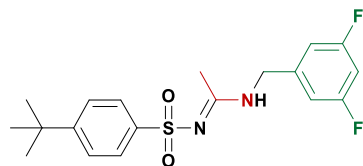

***N'*-((4-(*tert*-butyl)phenyl)sulfonyl)-*N*-(3,5-difluorobenzyl)acetimidamide (5af)**

White solid (69.1 mg, 91% yield, eluent: PE/EA = 1:1.5). mp: 90-92 °C. <sup>1</sup>H NMR (400 MHz, DMSO-*d*<sub>6</sub>) δ 9.19 (t, *J* = 5.8 Hz, 1H), 7.69 – 7.65 (m, 2H), 7.50 – 7.47 (m, 2H), 7.10 – 7.04 (m, 1H), 6.98 – 6.92 (m, 2H), 4.41 (d, *J* = 5.6 Hz, 2H), 2.34 (s, 3H), 1.27 (s, 9H). <sup>13</sup>C NMR (100 MHz, DMSO-*d*<sub>6</sub>) δ 165.9, 162.4 (dd, *J* = 246.5, 13.3 Hz), 154.4, 142.3 (t, *J* = 9.1 Hz), 140.9, 125.6, 125.5, 111.2 – 110.4 (m), 102.5 (t, *J* = 25.8 Hz), 43.8, 34.6, 30.8, 19.9. <sup>19</sup>F NMR (376 MHz, DMSO-*d*<sub>6</sub>) δ -109.86 (s, 2F). HRMS (ESI-TOF): Anal Calcd. For. C<sub>19</sub>H<sub>22</sub>F<sub>2</sub>N<sub>2</sub>O<sub>2</sub>S+H<sup>+</sup>: 381.1443, found: 381.1445. IR (neat, cm<sup>-1</sup>): ν 3280, 2965, 1626, 1555, 1418, 1271, 1113, 990, 840, 767, 635.

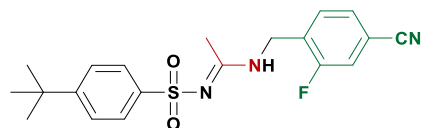

***N'*-((4-(*tert*-butyl)phenyl)sulfonyl)-*N*-(4-cyano-2-fluorobenzyl)acetimidamide (5ag)**

White solid (73.0 mg, 94% yield, eluent: PE/EA = 1:2). mp: 123-125 °C. <sup>1</sup>H NMR (400 MHz, DMSO-*d*<sub>6</sub>) δ 9.25 (t, *J* = 5.6 Hz, 1H), 7.78 – 7.75 (m, 1H), 7.63 – 7.61 (m, 2H), 7.59 – 7.58 (m, 1H), 7.50 – 7.48 (m, 2H), 7.46 – 7.44 (m, 1H), 4.46 (d, *J* = 5.5 Hz, 2H), 2.32 (s, 3H), 1.27 (s, 9H). <sup>13</sup>C NMR (100 MHz, DMSO-*d*<sub>6</sub>) δ 165.9, 159.6 (d, *J* = 248.3 Hz), 154.4, 140.8, 131.2 (d, *J* = 4.7 Hz), 130.7 (d, *J* = 14.8 Hz), 128.5 (d, *J* = 3.3 Hz), 125.6, 125.4, 119.1 (d, *J* = 25.4 Hz), 117.6, 111.6 (d, *J* = 10.0 Hz), 38.6 (d, *J* = 4.0 Hz), 34.6, 30.8, 19.8. <sup>19</sup>F NMR (376 MHz, DMSO-*d*<sub>6</sub>) δ -115.17 (s, 1F). HRMS (ESI-TOF): Anal Calcd. For. C<sub>20</sub>H<sub>22</sub>FN<sub>3</sub>O<sub>2</sub>S+Na<sup>+</sup>: 410.1309, found: 410.1309. IR (neat, cm<sup>-1</sup>): ν 3393, 2969, 1653, 1556, 1416, 1276, 1150, 1084, 1024, 822, 762, 644.

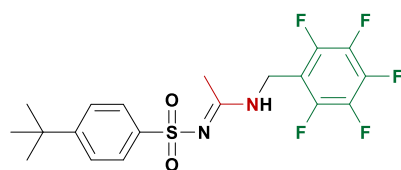

***N'*-((4-(*tert*-butyl)phenyl)sulfonyl)-*N*-((perfluorophenyl)methyl)acetimidamide (5ah)**

White solid (77.5 mg, 89% yield, eluent: PE/EA = 1.5:1). mp: 78-80 °C. <sup>1</sup>H NMR (400 MHz, DMSO-*d*<sub>6</sub>) δ 9.24 (s, 1H), 7.59 – 7.56 (m, 2H), 7.49 – 7.47 (m, 2H), 4.38 (s, 2H), 2.28 (s, 3H), 1.29 (s, 9H). <sup>13</sup>C NMR (100 MHz, DMSO-*d*<sub>6</sub>) δ 165.3, 154.5, 146.2 – 143.4 (m), 141.2 – 138.4 (m), 140.8, 138.0 – 135.2 (m), 125.4, 125.3, 111.8 – 111.3 (m), 34.6, 33.2, 30.7, 19.6. <sup>19</sup>F NMR (376 MHz, DMSO-*d*<sub>6</sub>) δ -141.99 to -142.08 (m, 2F), -156.23 to -156.35 (m, 1F), -163.29 to -163.43 (m, 2F). HRMS (ESI-TOF): Anal Calcd. For. C<sub>19</sub>H<sub>19</sub>F<sub>5</sub>N<sub>2</sub>O<sub>2</sub>S+H<sup>+</sup>: 435.1160, found: 435.1149. IR (neat, cm<sup>-1</sup>): ν 3393, 2971, 1654, 1457, 1266, 1144, 1024, 761, 662.

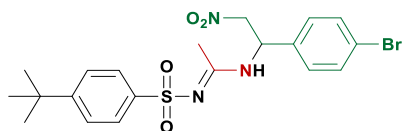

***N*-(1-(4-bromophenyl)-2-nitroethyl)-*N'*-((4-(*tert*-butyl)phenyl)sulfonyl)acetimidamide (5ai)**

White solid (84.6 mg, 88% yield, eluent: PE/EA = 1:1). mp: 133-135 °C. <sup>1</sup>H NMR (400 MHz, Chloroform-*d*) δ 7.92 (d, *J* = 7.7 Hz, 1H), 7.57 – 7.55 (m, 2H), 7.44 – 7.41 (m, 2H), 7.34 – 7.32 (m, 2H), 7.13 – 7.11 (m, 2H), 5.75 – 5.70 (m, 1H), 4.88 (dd, *J* = 13.6, 8.7 Hz, 1H), 4.58 (dd, *J* = 13.6, 5.2 Hz, 1H), 2.30 (s, 3H), 1.33 (s, 9H). <sup>13</sup>C NMR (100 MHz, Chloroform-*d*) δ 166.5, 155.8, 139.2, 134.8, 132.1, 128.7, 125.8, 125.7, 122.6, 76.7, 52.8, 35.0, 31.0, 20.4. HRMS (ESI-TOF): Anal Calcd. For. C<sub>20</sub>H<sub>24</sub>BrN<sub>3</sub>O<sub>4</sub>S+Na<sup>+</sup>: 504.0563, found: 504.0553. Anal Calcd. For. C<sub>20</sub>H<sub>24</sub><sup>81</sup>BrN<sub>3</sub>O<sub>4</sub>S+Na<sup>+</sup>: 506.0543, found: 506.0547. IR (neat, cm<sup>-1</sup>): ν 3320, 2968, 1663, 1541, 1379, 1266, 1146, 1085, 1011, 794, 669.

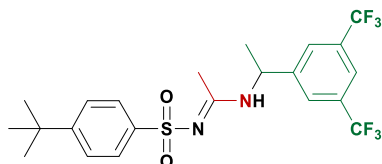

***N*-(1-(3,5-bis(trifluoromethyl)phenyl)ethyl)-*N'*-((4-(*tert*-butyl)phenyl)sulfonyl)acetimidamide (5aj)**

White solid (88.7 mg, 90% yield, eluent: PE/EA = 1:1). mp: 95-97 °C. <sup>1</sup>H NMR (400 MHz, DMSO-*d*<sub>6</sub>) δ 9.15 (d, *J* = 6.0 Hz, 1H), 7.95 – 7.91 (m, 1H), 7.90 – 7.87 (m, 2H), 7.44 – 7.39 (m, 2H), 7.38 – 7.35 (m, 2H), 5.14 – 5.08 (m, 1H), 2.30 (s, 3H), 1.43 (d, *J* = 7.1 Hz, 3H), 1.25 (s, 9H). <sup>13</sup>C NMR (100 MHz, DMSO-*d*<sub>6</sub>) δ 164.9, 154.2, 147.2, 140.8, 130.3 (q, *J* = 32.7 Hz), 126.9 (d, *J* = 3.8 Hz), 125.23, 125.20, 123.3 (q, *J* = 272.7 Hz), 120.8 – 120.6 (m), 50.3, 34.5, 30.7, 21.4, 19.9. <sup>19</sup>F NMR (376 MHz, DMSO-*d*<sub>6</sub>) δ -61.40 (s, 6F). HRMS (ESI-TOF): Anal Calcd. For. C<sub>22</sub>H<sub>24</sub>F<sub>6</sub>N<sub>2</sub>O<sub>2</sub>S+H<sup>+</sup>: 495.1535, found: 495.1519. IR (neat, cm<sup>-1</sup>): ν 3393, 2965, 1648, 1538, 1373, 1272, 1140, 1025, 773, 679.

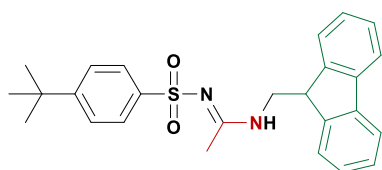

***N*-((9*H*-fluoren-9-yl)methyl)-*N'*-((4-(*tert*-butyl)phenyl)sulfonyl)acetimidamide (5ak)**

White oil (80.3 mg, 93% yield, eluent: PE/EA = 1:1). <sup>1</sup>H NMR (400 MHz, DMSO-*d*<sub>6</sub>) δ 9.18 (t, *J* = 5.4 Hz, 1H), 7.87 – 7.85 (m, 2H), 7.71 – 7.69 (m, 2H), 7.55 – 7.53 (m, 2H), 7.50 – 7.48 (m, 2H), 7.41 – 7.37 (m, 2H), 7.30 – 7.26 (m, 2H), 4.23 (t, *J* = 7.1 Hz, 1H), 3.57 (t, *J* = 6.1 Hz, 2H), 2.39 (s, 3H), 1.25 (s, 9H). <sup>13</sup>C NMR (100 MHz, DMSO-*d*<sub>6</sub>) δ 166.0, 154.3, 144.6, 141.1, 140.4, 127.5, 127.1, 125.6, 125.5, 124.8, 120.1, 45.4, 44.7, 34.6, 30.8, 19.9. HRMS (ESI-TOF): Anal Calcd. For. C<sub>26</sub>H<sub>28</sub>N<sub>2</sub>O<sub>2</sub>S+H<sup>+</sup>: 433.1944, found: 433.1925. IR (neat, cm<sup>-1</sup>): ν 3258, 2962, 1550, 1447, 1267, 1148, 1086, 1023, 759, 667.

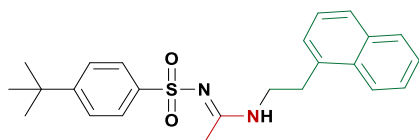

***N'*-((4-(*tert*-butyl)phenyl)sulfonyl)-*N*-(2-(naphthalen-1-yl)ethyl)acetimidamide (5al)**

White solid (40.4 mg, 49% yield, eluent: PE/EA = 1:1). mp: 125-127 °C. <sup>1</sup>H NMR (400 MHz, DMSO-*d*<sub>6</sub>) δ 8.91 (t, *J* = 5.6 Hz, 1H), 8.07 – 8.04 (m, 1H), 7.90 – 7.88 (m, 1H), 7.79 – 7.77 (m, 1H), 7.76 – 7.74 (m, 2H), 7.56 – 7.54 (m, 2H), 7.46 – 7.43 (m, 1H), 7.41 – 7.37 (m, 1H), 7.31 – 7.30 (m, 1H), 7.24 – 7.20 (m, 1H), 3.48 – 3.43 (m, 2H), 3.25 – 3.22 (m, 2H), 2.26 (s, 3H), 1.29 (s, 9H). <sup>13</sup>C NMR (100 MHz, DMSO-*d*<sub>6</sub>) δ 165.6, 154.3, 141.2, 134.9, 133.4, 131.5, 128.5, 127.0, 126.7, 125.9, 125.73, 125.68, 125.54, 125.51, 123.7, 42.2, 34.7, 31.1, 30.8, 20.0. HRMS (ESI-TOF): Anal Calcd. For. C<sub>24</sub>H<sub>28</sub>N<sub>2</sub>O<sub>2</sub>S+Na<sup>+</sup>: 431.1764, found: 431.1762. IR (neat, cm<sup>-1</sup>): ν 3393, 2962, 1647, 1539, 1294, 1147, 1023, 769, 650.

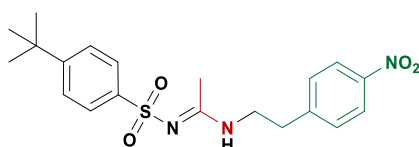

***N'*-((4-(*tert*-butyl)phenyl)sulfonyl)-*N*-(4-nitrophenethyl)acetimidamide (5am)**

White solid (59.1 mg, 73% yield, eluent: PE/EA = 1:1.5). mp: 94-96 °C. <sup>1</sup>H NMR (400 MHz, DMSO-*d*<sub>6</sub>) δ 8.76 (t, *J* = 5.5 Hz, 1H), 8.09 – 8.07 (m, 2H), 7.65 – 7.63 (m, 2H), 7.52 – 7.49 (m, 2H), 7.42 – 7.40 (m, 2H), 3.49 – 3.45 (m, 2H), 2.91 (t, *J* = 7.0 Hz, 2H), 2.17 (s, 3H), 1.27 (s, 9H). <sup>13</sup>C NMR (100 MHz, DMSO-*d*<sub>6</sub>) δ 165.8, 154.5, 147.4, 146.2, 141.1, 130.0, 125.7, 125.6, 123.4, 41.8, 34.7, 33.5, 30.9, 19.9. HRMS (ESI-TOF): Anal Calcd. For. C<sub>20</sub>H<sub>25</sub>N<sub>3</sub>O<sub>4</sub>S+Na<sup>+</sup>: 426.1458, found: 426.1459. IR (neat, cm<sup>-1</sup>): ν 3274, 2963, 1579, 1544, 1376, 1144, 1083, 796, 641.

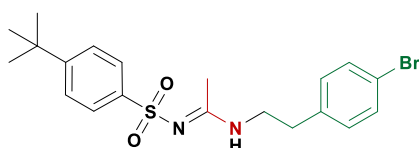

***N*-(4-bromophenethyl)-*N'*-((4-(*tert*-butyl)phenyl)sulfonyl)acetimidamide (5an)**

White solid (64.4 mg, 74% yield, eluent: PE/EA = 1:1). mp: 122-124 °C. <sup>1</sup>H NMR (400 MHz, DMSO-*d*<sub>6</sub>) δ 8.77 (t, *J* = 5.0 Hz, 1H), 7.66 – 7.63 (m, 2H), 7.55 – 7.53 (m, 2H), 7.45 – 7.41 (m, 2H), 7.13 – 7.09 (m, 2H), 3.39 – 3.36 (m, 2H), 2.75 (t, *J* = 7.1 Hz, 2H), 2.17 (s, 3H), 1.29 (s, 9H). <sup>13</sup>C NMR (100 MHz, DMSO-*d*<sub>6</sub>) δ 165.6, 154.3, 141.2, 138.4, 131.2, 130.9, 125.62, 125.59, 119.3, 42.2, 34.7, 32.9, 30.9, 19.9. HRMS (ESI-TOF): Anal Calcd. For. C<sub>20</sub>H<sub>25</sub>BrN<sub>2</sub>O<sub>2</sub>S+Na<sup>+</sup>: 459.0712, found: 459.0695. Anal Calcd. For. C<sub>20</sub>H<sub>25</sub><sup>81</sup>BrN<sub>2</sub>O<sub>2</sub>S+Na<sup>+</sup>: 461.0692, found: 461.0692. IR (neat, cm<sup>-1</sup>): ν 3393, 2964, 1653, 1546, 1291, 1145, 1023, 823, 764, 641.

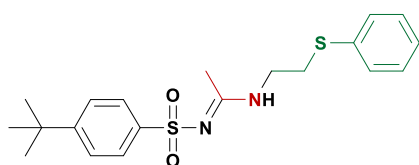

***N'*-((4-(*tert*-butyl)phenyl)sulfonyl)-*N*-(2-(phenylthio)ethyl)acetimidamide (5ao)**

White solid (36.7 mg, 47% yield, eluent: PE/EA = 1:1). mp: 62-64 °C. <sup>1</sup>H NMR (400 MHz, DMSO-*d*<sub>6</sub>) δ 8.92 (t, *J* = 5.5 Hz, 1H), 7.73 – 7.71 (m, 2H), 7.54 – 7.50 (m, 2H), 7.33 – 7.31 (m, 2H), 7.21 – 7.17 (m, 2H), 7.15 – 7.11 (m, 1H), 3.37 – 3.35 (m, 2H), 3.09 (t, *J* = 7.0 Hz, 2H), 2.21 (s, 3H), 1.28 (s, 9H). <sup>13</sup>C NMR (100 MHz, DMSO-*d*<sub>6</sub>) δ 165.9, 154.4, 141.0, 135.4, 129.0, 127.7, 125.7, 125.6, 125.5, 40.6, 34.7, 30.8, 29.6, 19.9. HRMS (ESI-TOF): Anal Calcd. For: C<sub>20</sub>H<sub>26</sub>N<sub>2</sub>O<sub>2</sub>S<sub>2</sub>+H<sup>+</sup>: 391.1508, found: 391.1520. IR (neat, cm<sup>-1</sup>): ν 3392, 2962, 1648, 1577, 1261, 1146, 1022, 794, 657.

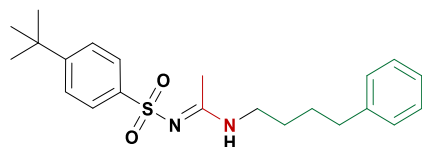

***N'*-((4-(*tert*-butyl)phenyl)sulfonyl)-*N*-(4-phenylbutyl)acetimidamide (5ap)**

White solid (56.7 mg, 73% yield, eluent: PE/EA = 1:1). mp: 109-111 °C. <sup>1</sup>H NMR (400 MHz, DMSO-*d*<sub>6</sub>) δ 8.66 (t, *J* = 5.4 Hz, 1H), 7.71 – 7.69 (m, 2H), 7.51 – 7.49 (m, 2H), 7.27 – 7.23 (m, 2H), 7.17 – 7.13 (m, 3H), 3.21 – 3.16 (m, 2H), 2.56 – 2.52 (m, 2H), 2.21 (s, 3H), 1.57 – 1.45 (m, 4H), 1.26 (s, 9H). <sup>13</sup>C NMR (100 MHz, DMSO-*d*<sub>6</sub>) δ 165.5, 154.2, 141.9, 141.3, 128.3, 128.2, 125.6, 125.5, 40.9, 34.7, 34.6, 30.8, 28.2, 27.4, 19.9. HRMS (ESI-TOF): Anal Calcd. For: C<sub>22</sub>H<sub>30</sub>N<sub>2</sub>O<sub>2</sub>S+H<sup>+</sup>: 387.2101, found: 387.2102. IR (neat, cm<sup>-1</sup>): ν 3392, 2962, 1647, 1543, 1269, 1147, 1024, 773, 645.

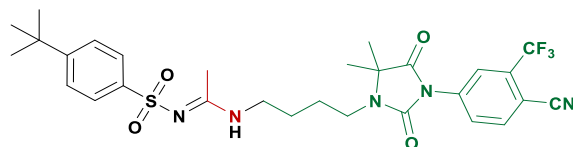

***N'*-((4-(*tert*-butyl)phenyl)sulfonyl)-*N*-(4-(3-(4-cyano-3-(trifluoromethyl)phenyl)-5,5-dimethyl-2,4-dioxoimidazolidin-1-yl)butyl)acetimidamide (5aq)**

White oil (88.9 mg, 73% yield, eluent: PE/EA = 1:3). <sup>1</sup>H NMR (400 MHz, DMSO-*d*<sub>6</sub>) δ 8.70 (t, *J* = 5.3 Hz, 1H), 8.30 – 8.28 (m, 1H), 8.195 – 8.189 (m, 1H), 8.05 – 8.03 (m, 1H), 7.72 – 7.69 (m, 2H), 7.52 – 7.48 (m, 2H), 3.34 – 3.31 (m, 2H), 3.24 – 3.19 (m, 2H), 2.22 (s, 3H), 1.65 – 1.61 (m, 2H), 1.59 – 1.54 (m, 2H), 1.45 (s, 6H), 1.26 (s, 9H). <sup>13</sup>C NMR (100 MHz, DMSO-*d*<sub>6</sub>) δ 174.6, 165.6, 154.2, 152.6, 141.2, 136.9, 136.0, 131.1 (q, *J* = 32.3 Hz), 129.8, 125.6, 125.5, 123.9 (q, *J* = 4.4 Hz), 122.2 (q, *J* = 273.6 Hz), 115.2, 106.6, 61.6, 40.8, 39.1, 34.6, 30.8, 26.4, 25.1, 22.5, 19.9. <sup>19</sup>F NMR (376 MHz, DMSO-*d*<sub>6</sub>) δ -60.97 (s, 3F). HRMS (ESI-TOF): Anal Calcd. For: C<sub>29</sub>H<sub>34</sub>F<sub>3</sub>N<sub>5</sub>O<sub>4</sub>S+Na<sup>+</sup>: 628.2176, found: 628.2176. IR (neat, cm<sup>-1</sup>): ν 3270, 2964, 1777, 1719, 1554, 1410, 1313, 1142, 1026, 762, 670.

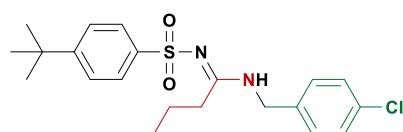

***N'*-((4-(*tert*-butyl)phenyl)sulfonyl)-*N*-(4-chlorobenzyl)butyrimidamide (6a)**

White solid (74.1 mg, 91% yield, eluent: PE/EA = 1.5:1). mp: 89-91 °C. <sup>1</sup>H NMR (400 MHz, DMSO-*d*<sub>6</sub>) δ 9.11 (t, *J* = 5.7 Hz, 1H), 7.65 – 7.61 (m, 2H), 7.50 – 7.47 (m, 2H), 7.35 – 7.31 (m, 2H),

7.25 – 7.21 (m, 2H), 4.35 (d,  $J = 5.6$  Hz, 2H), 2.70 – 2.66 (m, 2H), 1.69 – 1.59 (m, 2H), 1.28 (s, 9H), 0.88 (t,  $J = 7.4$  Hz, 3H).  $^{13}\text{C}$  NMR (100 MHz, DMSO- $d_6$ )  $\delta$  168.5, 154.1, 141.5, 136.7, 131.7, 129.4, 128.2, 125.4, 125.3, 43.8, 34.9, 34.6, 30.8, 21.1, 13.6. HRMS (ESI-TOF): Anal Calcd. For.  $\text{C}_{21}\text{H}_{27}\text{ClN}_2\text{O}_2\text{S}+\text{H}^+$ : 407.1555, found: 407.1539. Anal Calcd. For.  $\text{C}_{21}\text{H}_{27}^{37}\text{ClN}_2\text{O}_2\text{S}+\text{H}^+$ : 409.1525, found: 409.1519. IR (neat,  $\text{cm}^{-1}$ ):  $\nu$  3392, 2966, 1648, 1556, 1260, 1024, 797, 695.

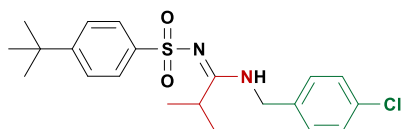

***N'*-((4-(*tert*-butyl)phenyl)sulfonyl)-*N*-(4-chlorobenzyl)isobutyrimidamide (6b)**

White solid (70.6 mg, 87% yield, eluent: PE/EA = 1.5:1). mp: 65-67 °C.  $^1\text{H}$  NMR (400 MHz, DMSO- $d_6$ )  $\delta$  8.83 (t,  $J = 5.9$  Hz, 1H), 7.60 – 7.58 (m, 2H), 7.49 – 7.47 (m, 2H), 7.35 – 7.33 (m, 2H), 7.21 – 7.19 (m, 2H), 4.35 (d,  $J = 5.8$  Hz, 2H), 3.70 – 3.59 (m, 1H), 1.27 (s, 9H), 1.15 (d,  $J = 7.0$  Hz, 6H).  $^{13}\text{C}$  NMR (100 MHz, DMSO- $d_6$ )  $\delta$  173.1, 154.2, 141.4, 137.1, 131.5, 129.0, 128.2, 125.4, 125.3, 43.6, 34.6, 31.8, 30.8, 19.7. HRMS (ESI-TOF): Anal Calcd. For.  $\text{C}_{21}\text{H}_{27}\text{ClN}_2\text{O}_2\text{S}+\text{H}^+$ : 407.1555, found: 407.1549. Anal Calcd. For.  $\text{C}_{21}\text{H}_{27}^{37}\text{ClN}_2\text{O}_2\text{S}+\text{H}^+$ : 409.1525, found: 409.1534. IR (neat,  $\text{cm}^{-1}$ ):  $\nu$  3366, 2970, 1594, 1396, 1171, 1066, 1012, 795, 683.

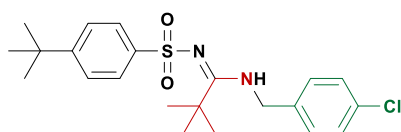

***N'*-((4-(*tert*-butyl)phenyl)sulfonyl)-*N*-(4-chlorobenzyl)pivalimidamide (6c)**

White solid (73.8 mg, 88% yield, eluent: PE/EA = 2:1). mp: 96-98 °C.  $^1\text{H}$  NMR (400 MHz, DMSO- $d_6$ )  $\delta$  8.57 (t,  $J = 4.8$  Hz, 1H), 7.64 – 7.62 (m, 2H), 7.48 – 7.46 (m, 2H), 7.32 – 7.30 (m, 2H), 7.18 – 7.16 (m, 2H), 4.59 (d,  $J = 5.2$  Hz, 2H), 1.30 (s, 9H), 1.29 (s, 9H).  $^{13}\text{C}$  NMR (100 MHz, DMSO- $d_6$ )  $\delta$  170.2, 153.7, 142.7, 136.9, 131.5, 129.0, 128.1, 125.2, 125.1, 46.3, 39.9, 34.6, 30.9, 28.0. HRMS (ESI-TOF): Anal Calcd. For.  $\text{C}_{22}\text{H}_{29}\text{ClN}_2\text{O}_2\text{S}+\text{H}^+$ : 421.1711, found: 421.1691. Anal Calcd. For.  $\text{C}_{22}\text{H}_{29}^{37}\text{ClN}_2\text{O}_2\text{S}+\text{H}^+$ : 423.1682, found: 423.1700. IR (neat,  $\text{cm}^{-1}$ ):  $\nu$  3392, 2965, 1648, 1553, 1262, 1086, 1023, 802, 642.

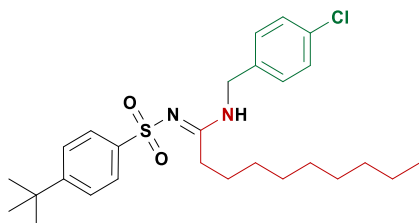

***N'*-((4-(*tert*-butyl)phenyl)sulfonyl)-*N*-(4-chlorobenzyl)decanimidamide (6d)**

White solid (78.8 mg, 80% yield, eluent: PE/EA = 2:1). mp: 53-55 °C.  $^1\text{H}$  NMR (400 MHz, DMSO- $d_6$ )  $\delta$  9.09 (t,  $J = 5.6$  Hz, 1H), 7.62 – 7.60 (m, 2H), 7.49 – 7.46 (m, 2H), 7.34 – 7.31 (m, 2H), 7.24 – 7.22 (m, 2H), 4.35 (d,  $J = 5.3$  Hz, 2H), 2.69 – 2.65 (m, 2H), 1.55 – 1.48 (m, 2H), 1.28 (s, 9H), 1.25 – 1.18 (m, 12H), 0.85 (t,  $J = 6.6$  Hz, 3H).  $^{13}\text{C}$  NMR (100 MHz, DMSO- $d_6$ )  $\delta$  168.8, 154.1, 141.5, 136.7, 131.7, 129.4, 128.2, 125.5, 125.3, 43.8, 34.6, 32.9, 31.3, 30.8, 28.8, 28.64, 28.61, 27.4, 22.1,

13.9. **HRMS** (ESI-TOF): Anal Calcd. For.  $C_{27}H_{39}ClN_2O_2S+Na^+$ : 513.2313, found: 513.2316. Anal Calcd. For.  $C_{27}H_{39}^{37}ClN_2O_2S+Na^+$ : 515.2283, found: 515.2279. **IR** (neat,  $cm^{-1}$ ):  $\nu$  3312, 2925, 1653, 1555, 1352, 1261, 1143, 1084, 1011, 758, 652.

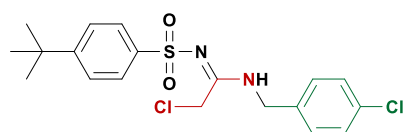

***N'*-((4-(*tert*-butyl)phenyl)sulfonyl)-2-chloro-*N*-(4-chlorobenzyl)acetimidamide (6e)**

White solid (80.9 mg, 98% yield, eluent: PE/EA = 2:1). mp: 95-97 °C.  **$^1H$  NMR** (400 MHz, DMSO- $d_6$ )  $\delta$  9.56 (t,  $J$  = 5.8 Hz, 1H), 7.64 – 7.62 (m, 2H), 7.49 – 7.47 (m, 2H), 7.31 – 7.29 (m, 2H), 7.23 – 7.21 (m, 2H), 4.72 (s, 2H), 4.38 (d,  $J$  = 5.7 Hz, 2H), 1.28 (s, 9H).  **$^{13}C$  NMR** (100 MHz, DMSO- $d_6$ )  $\delta$  161.4, 154.6, 140.6, 136.1, 131.8, 129.4, 128.2, 125.6, 125.5, 44.1, 38.7, 34.7, 30.8. **HRMS** (ESI-TOF): Anal Calcd. For.  $C_{19}H_{22}Cl_2N_2O_2S+Na^+$ : 435.0671, found: 435.0671. Anal Calcd. For.  $C_{19}H_{22}^{37}Cl_2N_2O_2S+Na^+$ : 437.0642, found: 437.0650. **IR** (neat,  $cm^{-1}$ ):  $\nu$  3394, 2967, 1648, 1572, 1428, 1278, 1151, 1050, 954, 768, 646.

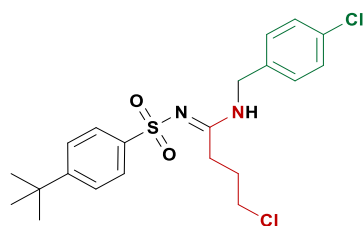

***N'*-((4-(*tert*-butyl)phenyl)sulfonyl)-4-chloro-*N*-(4-chlorobenzyl)butanimidamide (6f)**

Yellow oil (74.9 mg, 85% yield, eluent: PE/EA = 1.5:1).  **$^1H$  NMR** (400 MHz, DMSO- $d_6$ )  $\delta$  9.23 (t,  $J$  = 5.6 Hz, 1H), 7.62 – 7.59 (m, 2H), 7.51 – 7.47 (m, 2H), 7.36 – 7.32 (m, 2H), 7.25 – 7.22 (m, 2H), 4.33 (d,  $J$  = 5.6 Hz, 2H), 3.60 (t,  $J$  = 6.7 Hz, 2H), 2.81 – 2.77 (m, 2H), 2.07 – 1.99 (m, 2H), 1.29 (s, 9H).  **$^{13}C$  NMR** (100 MHz, DMSO- $d_6$ )  $\delta$  167.5, 154.4, 141.2, 136.6, 131.7, 129.5, 128.3, 125.5, 44.4, 44.0, 34.7, 31.0, 30.8, 30.5. **HRMS** (ESI-TOF): Anal Calcd. For.  $C_{21}H_{26}Cl_2N_2O_2S+H^+$ : 441.1165, found: 441.1167. Anal Calcd. For.  $C_{21}H_{26}^{37}Cl_2N_2O_2S+H^+$ : 443.1135, found: 443.1144. **IR** (neat,  $cm^{-1}$ ):  $\nu$  3393, 2965, 1654, 1553, 1269, 1148, 1087, 1025, 822, 759, 658.

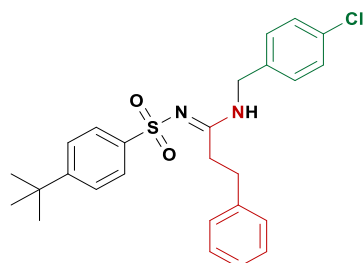

***N'*-((4-(*tert*-butyl)phenyl)sulfonyl)-*N*-(4-chlorobenzyl)-3-phenylpropanimidamide (6g)**

Yellow solid (39.6 mg, 42% yield, eluent: PE/EA = 2:1). mp: 97-99 °C.  **$^1H$  NMR** (400 MHz, DMSO- $d_6$ )  $\delta$  9.17 (t,  $J$  = 5.6 Hz, 1H), 7.64 – 7.62 (m, 2H), 7.51 – 7.49 (m, 2H), 7.33 – 7.28 (m, 4H), 7.23 – 7.18 (m, 3H), 7.16 – 7.14 (m, 2H), 4.33 (d,  $J$  = 5.5 Hz, 2H), 2.99 – 2.89 (m, 4H), 1.29 (s, 9H).  **$^{13}C$  NMR** (100 MHz, DMSO- $d_6$ )  $\delta$  167.6, 154.3, 141.4, 140.1, 136.5, 131.7, 129.4, 128.4,

128.25, 128.24, 126.3, 125.50, 125.48, 43.9, 35.1, 34.7, 33.3, 30.8. **HRMS** (ESI-TOF): Anal Calcd. For.  $C_{26}H_{29}ClN_2O_2S+Na^+$ : 491.1530, found: 491.1527. Anal Calcd. For.  $C_{26}H_{29}^{37}ClN_2O_2S+Na^+$ : 493.1501, found: 493.1505. **IR** (neat,  $cm^{-1}$ ):  $\nu$  3392, 2961, 1648, 1557, 1362, 1260, 1140, 1084, 927, 763, 658.

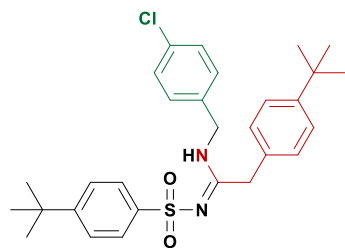

**2-(4-(*tert*-butyl)phenyl)-*N'*-((4-(*tert*-butyl)phenyl)sulfonyl)-*N*-(4-chlorobenzyl)acetimidamide (6h)**

White solid (90.7 mg, 89% yield, eluent: PE/EA = 2:1). mp: 93-95 °C.  **$^1H$  NMR** (400 MHz, DMSO- $d_6$ )  $\delta$  9.16 (t,  $J$  = 5.7 Hz, 1H), 7.56 – 7.52 (m, 2H), 7.45 – 7.42 (m, 2H), 7.34 – 7.30 (m, 2H), 7.29 – 7.26 (m, 2H), 7.25 – 7.22 (m, 2H), 7.21 – 7.16 (m, 2H), 4.37 (d,  $J$  = 5.4 Hz, 2H), 4.13 (s, 2H), 1.28 (s, 9H), 1.27 (s, 9H).  **$^{13}C$  NMR** (100 MHz, DMSO- $d_6$ )  $\delta$  165.9, 154.1, 149.1, 141.2, 136.7, 132.3, 131.6, 129.5, 128.5, 128.1, 125.5, 125.3, 125.1, 44.1, 37.5, 34.6, 34.1, 31.1, 30.8. **HRMS** (ESI-TOF): Anal Calcd. For.  $C_{29}H_{35}ClN_2O_2S+H^+$ : 511.2181, found: 511.2185. Anal Calcd. For.  $C_{29}H_{35}^{37}ClN_2O_2S+H^+$ : 513.2151, found: 513.2150. **IR** (neat,  $cm^{-1}$ ):  $\nu$  3379, 2962, 1653, 1547, 1269, 1144, 1001, 808, 658.

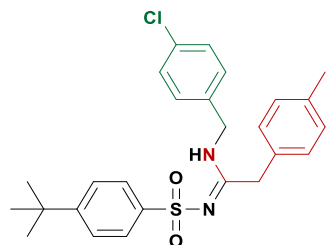

***N'*-((4-(*tert*-butyl)phenyl)sulfonyl)-*N*-(4-chlorobenzyl)-2-(*p*-tolyl)acetimidamide (6i)**

White solid (62.6 mg, 67% yield, eluent: PE/EA = 2:1). mp: 95-97 °C.  **$^1H$  NMR** (400 MHz, DMSO- $d_6$ )  $\delta$  9.11 (t,  $J$  = 5.8 Hz, 1H), 7.54 – 7.51 (m, 2H), 7.43 – 7.40 (m, 2H), 7.31 – 7.29 (m, 2H), 7.20 – 7.18 (m, 2H), 7.16 – 7.14 (m, 2H), 7.08 – 7.04 (m, 2H), 4.36 (d,  $J$  = 5.6 Hz, 2H), 4.09 (s, 2H), 2.26 (s, 3H), 1.28 (s, 9H).  **$^{13}C$  NMR** (100 MHz, DMSO- $d_6$ )  $\delta$  166.0, 154.2, 141.1, 136.7, 135.8, 132.1, 131.7, 129.5, 128.9, 128.7, 128.2, 125.4, 125.3, 44.1, 37.6, 34.6, 30.8, 20.6. **HRMS** (ESI-TOF): Anal Calcd. For.  $C_{26}H_{29}ClN_2O_2S+H^+$ : 469.1711, found: 469.1708. Anal Calcd. For.  $C_{26}H_{29}^{37}ClN_2O_2S+H^+$ : 471.1682, found: 471.1692. **IR** (neat,  $cm^{-1}$ ):  $\nu$  3322, 2964, 1647, 1542, 1399, 1260, 1146, 1087, 922, 796, 657.



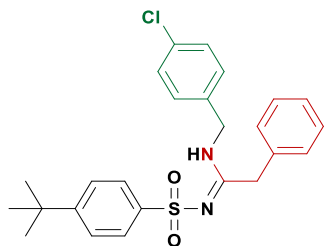

***N'*-((4-(*tert*-butyl)phenyl)sulfonyl)-*N*-(4-chlorobenzyl)-2-phenylacetimidamide (6j)**

Yellow solid (57.3 mg, 63% yield, eluent: PE/EA = 1.5:1). mp: 81-83 °C. <sup>1</sup>H NMR (400 MHz, DMSO-*d*<sub>6</sub>) δ 9.18 (t, *J* = 5.7 Hz, 1H), 7.55 – 7.53 (m, 2H), 7.44 – 7.42 (m, 2H), 7.31 – 7.29 (m, 2H), 7.28 – 7.21 (m, 5H), 7.21 – 7.19 (m, 2H), 4.38 (d, *J* = 5.6 Hz, 2H), 4.16 (s, 2H), 1.28 (s, 9H). <sup>13</sup>C NMR (100 MHz, DMSO-*d*<sub>6</sub>) δ 165.7, 154.2, 141.1, 136.7, 135.3, 131.7, 129.5, 128.8, 128.3, 128.2, 126.7, 125.4, 125.3, 44.1, 38.0, 34.6, 30.8. HRMS (ESI-TOF): Anal Calcd. For. C<sub>25</sub>H<sub>27</sub>ClN<sub>2</sub>O<sub>2</sub>S+H<sup>+</sup>: 455.1555, found: 455.1553. Anal Calcd. For. C<sub>25</sub>H<sub>27</sub><sup>37</sup>ClN<sub>2</sub>O<sub>2</sub>S+H<sup>+</sup>: 457.1525, found: 457.1528. IR (neat, cm<sup>-1</sup>): ν 3307, 2958, 1647, 1560, 1253, 1143, 1086, 1011, 796, 639.

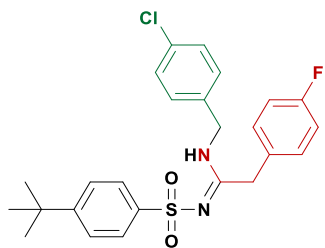

***N'*-((4-(*tert*-butyl)phenyl)sulfonyl)-*N*-(4-chlorobenzyl)-2-(4-fluorophenyl)acetimidamide (6k)**

Yellow solid (62.9 mg, 67% yield, eluent: PE/EA = 1.5:1). mp: 88-90 °C. <sup>1</sup>H NMR (400 MHz, DMSO-*d*<sub>6</sub>) δ 9.23 (t, *J* = 5.9 Hz, 1H), 7.59 – 7.53 (m, 2H), 7.42 – 7.40 (m, 2H), 7.34 – 7.30 (m, 4H), 7.22 – 7.20 (m, 2H), 7.09 – 7.05 (m, 2H), 4.40 (d, *J* = 5.5 Hz, 2H), 4.16 (s, 2H), 1.27 (s, 9H). <sup>13</sup>C NMR (100 MHz, DMSO-*d*<sub>6</sub>) δ 165.7, 161.2 (d, *J* = 243.2 Hz), 154.2, 141.0, 136.6, 131.8, 131.3 (d, *J* = 3.3 Hz), 130.7 (d, *J* = 8.4 Hz), 129.6, 128.2, 125.4, 125.3, 115.1 (d, *J* = 21.3 Hz), 44.2, 37.2, 34.6, 30.8. <sup>19</sup>F NMR (376 MHz, DMSO-*d*<sub>6</sub>) δ -115.95 (s, 1F). HRMS (ESI-TOF): Anal Calcd. For. C<sub>25</sub>H<sub>26</sub>ClFN<sub>2</sub>O<sub>2</sub>S+Na<sup>+</sup>: 495.1280, found: 495.1292. Anal Calcd. For. C<sub>25</sub>H<sub>26</sub><sup>37</sup>ClFN<sub>2</sub>O<sub>2</sub>S+Na<sup>+</sup>: 497.1250, found: 497.1250. IR (neat, cm<sup>-1</sup>): ν 3342, 2968, 1557, 1440, 1260, 1143, 1083, 965, 796, 657.

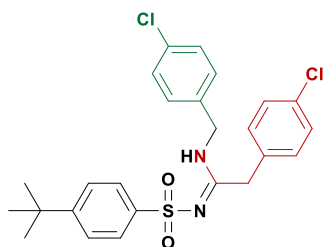

***N'*-((4-(*tert*-butyl)phenyl)sulfonyl)-*N*-(4-chlorobenzyl)-2-(4-chlorophenyl)acetimidamide (6l)**

White solid (73.8 mg, 76% yield, eluent: PE/EA = 1:1). mp: 95-97 °C. <sup>1</sup>H NMR (400 MHz, DMSO-*d*<sub>6</sub>) δ 9.26 (t, *J* = 5.6 Hz, 1H), 7.52 – 7.48 (m, 2H), 7.41 – 7.38 (m, 2H), 7.34 – 7.31 (m, 2H), 7.31 –

7.28 (m, 2H), 7.27 – 7.24 (m, 2H), 7.23 – 7.21 (m, 2H), 4.39 (d,  $J = 5.2$  Hz, 2H), 4.14 (s, 2H), 1.28 (s, 9H).  $^{13}\text{C}$  NMR (100 MHz, DMSO- $d_6$ )  $\delta$  165.3, 154.2, 140.9, 136.6, 134.1, 131.7, 131.5, 130.6, 129.6, 128.2, 125.4, 125.2, 44.2, 37.3, 34.6, 30.8. HRMS (ESI-TOF): Anal Calcd. For.  $\text{C}_{25}\text{H}_{26}\text{Cl}_2\text{N}_2\text{O}_2\text{S}+\text{H}^+$ : 489.1165, found: 489.1147. Anal Calcd. For.  $\text{C}_{25}\text{H}_{26}^{37}\text{ClClN}_2\text{O}_2\text{S}+\text{H}^+$ : 491.1135, found: 491.1146. IR (neat,  $\text{cm}^{-1}$ ):  $\nu$  3335, 2971, 1648, 1558, 1490, 1273, 1148, 1024, 799, 660.

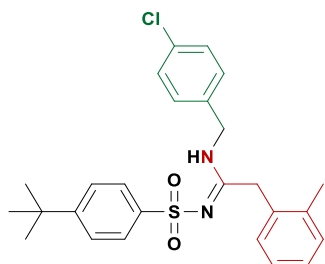

***N'*-((4-(*tert*-butyl)phenyl)sulfonyl)-*N*-(4-chlorobenzyl)-2-(*o*-tolyl)acetimidamide (6m)**

White solid (50.6 mg, 54% yield, eluent: PE/EA = 2:1). mp: 115-117 °C.  $^1\text{H}$  NMR (400 MHz, DMSO- $d_6$ )  $\delta$  8.75 (t,  $J = 5.8$  Hz, 1H), 7.55 – 7.53 (m, 2H), 7.43 – 7.41 (m, 2H), 7.35 – 7.33 (m, 2H), 7.25 – 7.23 (m, 2H), 7.17 – 7.11 (m, 2H), 7.04 – 7.01 (m, 1H), 6.91 – 6.89 (m, 1H), 4.40 (d,  $J = 5.7$  Hz, 2H), 4.07 (s, 2H), 2.12 (s, 3H), 1.28 (s, 9H).  $^{13}\text{C}$  NMR (100 MHz, DMSO- $d_6$ )  $\delta$  166.1, 154.2, 140.8, 136.8, 136.1, 133.3, 131.7, 129.9, 129.7, 128.23, 128.16, 126.9, 126.0, 125.6, 125.3, 44.2, 36.2, 34.6, 30.8, 19.0. HRMS (ESI-TOF): Anal Calcd. For.  $\text{C}_{26}\text{H}_{29}\text{ClN}_2\text{O}_2\text{S}+\text{H}^+$ : 469.1711, found: 469.1714. Anal Calcd. For.  $\text{C}_{26}\text{H}_{29}^{37}\text{ClN}_2\text{O}_2\text{S}+\text{H}^+$ : 471.1682, found: 471.1689. IR (neat,  $\text{cm}^{-1}$ ):  $\nu$  3393, 2962, 1652, 1556, 1265, 1141, 1024, 827, 737, 640.

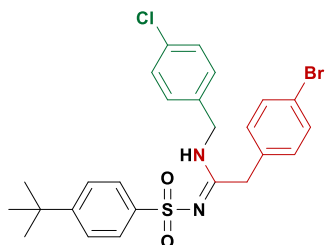

**2-(4-bromophenyl)-*N'*-((4-(*tert*-butyl)phenyl)sulfonyl)-*N*-(4-chlorobenzyl)acetimidamide (6n)**

Yellow solid (93.1 mg, 87% yield, eluent: PE/EA = 2:1). mp: 128-130 °C.  $^1\text{H}$  NMR (400 MHz, DMSO- $d_6$ )  $\delta$  9.26 (t,  $J = 5.7$  Hz, 1H), 7.52 – 7.50 (m, 2H), 7.45 – 7.42 (m, 2H), 7.41 – 7.39 (m, 2H), 7.34 – 7.32 (m, 2H), 7.24 – 7.21 (m, 2H), 7.21 – 7.19 (m, 2H), 4.40 (d,  $J = 5.6$  Hz, 2H), 4.13 (s, 2H), 1.28 (s, 9H).  $^{13}\text{C}$  NMR (100 MHz, DMSO- $d_6$ )  $\delta$  165.2, 154.2, 140.9, 136.5, 134.5, 131.7, 131.1, 130.9, 129.6, 128.2, 125.4, 125.2, 119.9, 44.2, 37.4, 34.6, 30.8. HRMS (ESI-TOF): Anal Calcd. For.  $\text{C}_{25}\text{H}_{26}\text{BrClN}_2\text{O}_2\text{S}+\text{Na}^+$ : 555.0479, found: 555.0496. Anal Calcd. For.  $\text{C}_{25}\text{H}_{26}\text{Br}^{37}\text{ClN}_2\text{O}_2\text{S}+\text{Na}^+$ : 557.0459, found: 557.0446. IR (neat,  $\text{cm}^{-1}$ ):  $\nu$  3371, 2964, 1556, 1426, 1249, 1140, 1009, 793, 655.

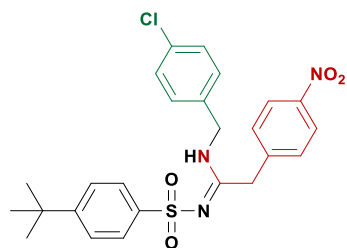

***N'*-((4-(*tert*-butyl)phenyl)sulfonyl)-*N*-(4-chlorobenzyl)-2-(4-nitrophenyl)acetimidamide (6o)**

Yellow solid (49.6 mg, 50% yield, eluent: PE/EA = 1:1). mp: 100-102 °C. <sup>1</sup>H NMR (400 MHz, DMSO-*d*<sub>6</sub>) δ 9.43 (t, *J* = 5.6 Hz, 1H), 8.11 – 8.08 (m, 2H), 7.47 – 7.45 (m, 2H), 7.45 – 7.43 (m, 2H), 7.38 – 7.36 (m, 2H), 7.36 – 7.33 (m, 2H), 7.28 – 7.25 (m, 2H), 4.43 (d, *J* = 5.5 Hz, 2H), 4.27 (s, 2H), 1.24 (s, 9H). <sup>13</sup>C NMR (100 MHz, DMSO-*d*<sub>6</sub>) δ 164.4, 154.3, 146.3, 143.1, 140.7, 136.4, 131.8, 129.8, 129.7, 128.3, 125.4, 125.2, 123.3, 44.3, 37.9, 34.6, 30.7. HRMS (ESI-TOF): Anal Calcd. For. C<sub>25</sub>H<sub>26</sub>ClN<sub>3</sub>O<sub>4</sub>S+H<sup>+</sup>: 500.1405, found: 500.1417. Anal Calcd. For. C<sub>25</sub>H<sub>26</sub><sup>37</sup>ClN<sub>3</sub>O<sub>4</sub>S+H<sup>+</sup>: 502.1376, found: 502.1384. IR (neat, cm<sup>-1</sup>): ν 3234, 2964, 1647, 1559, 1434, 1346, 1270, 1148, 1022, 801, 652.

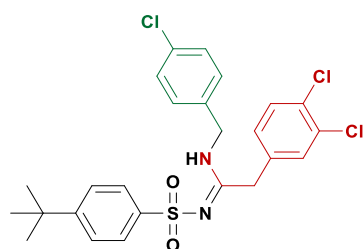

***N'*-((4-(*tert*-butyl)phenyl)sulfonyl)-*N*-(4-chlorobenzyl)-2-(3,4-dichlorophenyl)acetimidamide (6p)**

White solid (76.7 mg, 73% yield, eluent: PE/EA = 1.5:1). mp: 103-105 °C. <sup>1</sup>H NMR (400 MHz, DMSO-*d*<sub>6</sub>) δ 9.32 (t, *J* = 5.7 Hz, 1H), 7.51 – 7.49 (m, 1H), 7.47 – 7.45 (m, 2H), 7.39 – 7.37 (m, 2H), 7.35 – 7.32 (m, 3H), 7.24 – 7.20 (m, 3H), 4.40 (d, *J* = 5.6 Hz, 2H), 4.13 (s, 2H), 1.27 (s, 9H). <sup>13</sup>C NMR (100 MHz, DMSO-*d*<sub>6</sub>) δ 164.7, 154.3, 140.7, 136.5, 136.1, 131.8, 130.8, 130.6, 130.3, 129.6, 129.4, 129.1, 128.3, 125.3, 125.2, 44.2, 36.9, 34.6, 30.8. HRMS (ESI-TOF): Anal Calcd. For. C<sub>25</sub>H<sub>25</sub>Cl<sub>3</sub>N<sub>2</sub>O<sub>2</sub>S+Na<sup>+</sup>: 545.0595, found: 545.0576. Anal Calcd. For. C<sub>25</sub>H<sub>25</sub><sup>37</sup>Cl<sub>3</sub>N<sub>2</sub>O<sub>2</sub>S+Na<sup>+</sup>: 547.0565, found: 547.0541. IR (neat, cm<sup>-1</sup>): ν 3309, 2963, 1541, 1402, 1260, 1145, 1083, 1013, 795, 642.

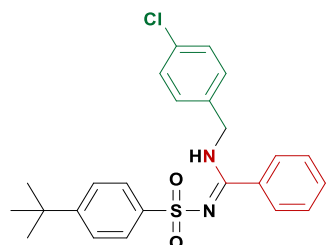

***N'*-((4-(*tert*-butyl)phenyl)sulfonyl)-*N*-(4-chlorobenzyl)benzimidamide (6q)**

White solid (74.6 mg, 85% yield, eluent: PE/EA = 1.5:1). mp: 105-107 °C. <sup>1</sup>H NMR (400 MHz, DMSO-*d*<sub>6</sub>) δ 9.38 (t, *J* = 5.1 Hz, 1H), 7.52 – 7.47 (m, 1H), 7.44 – 7.41 (m, 4H), 7.40 – 7.39 (m, 4H),

7.36 – 7.33 (m, 2H), 7.30 – 7.27 (m, 2H), 4.46 (d,  $J = 5.3$  Hz, 2H), 1.28 (s, 9H).  $^{13}\text{C}$  NMR (100 MHz, DMSO- $d_6$ )  $\delta$  165.2, 154.1, 141.2, 136.7, 134.0, 131.6, 130.5, 129.3, 128.3, 127.9, 127.8, 125.5, 125.2, 44.4, 34.6, 30.9. HRMS (ESI-TOF): Anal Calcd. For.  $\text{C}_{24}\text{H}_{25}\text{ClN}_2\text{O}_2\text{S}+\text{H}^+$ : 441.1398, found: 441.1397. Anal Calcd. For.  $\text{C}_{24}\text{H}_{25}^{37}\text{ClN}_2\text{O}_2\text{S}+\text{H}^+$ : 443.1369, found: 443.1367. IR (neat,  $\text{cm}^{-1}$ ):  $\nu$  3298, 2958, 1647, 1543, 1343, 1283, 1083, 1012, 780, 654.

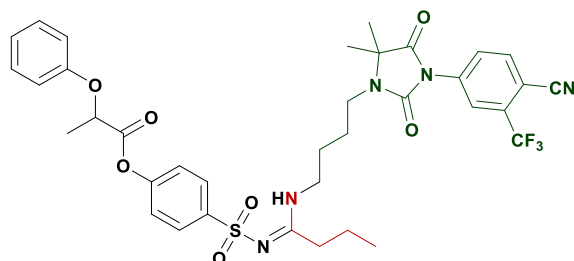

**4-(N-(1-((4-(3-(4-cyano-3-(trifluoromethyl)phenyl)-5,5-dimethyl-2,4-dioximidazolidin-1-yl)butyl)amino)butylidene)sulfamoyl)phenyl 2-phenoxypropanoate (7a)**

White oil (113.3 mg, 76% yield, eluent: PE/EA = 1:2).  $^1\text{H}$  NMR (400 MHz, DMSO- $d_6$ )  $\delta$  8.71 (t,  $J = 5.4$  Hz, 1H), 8.29 – 8.27 (m, 1H), 8.20 – 8.19 (m, 1H), 8.05 – 8.03 (m, 1H), 7.90 – 7.86 (m, 2H), 7.34 – 7.30 (m, 2H), 7.30 – 7.25 (m, 2H), 7.03 – 7.00 (m, 2H), 7.00 – 6.97 (m, 1H), 5.28 (q,  $J = 6.8$  Hz, 1H), 3.29 (t,  $J = 7.2$  Hz, 2H), 3.23 – 3.19 (m, 2H), 2.64 – 2.60 (m, 2H), 1.69 (d,  $J = 6.8$  Hz, 3H), 1.64 – 1.51 (m, 6H), 1.43 (s, 6H), 0.88 (t,  $J = 7.3$  Hz, 3H).  $^{13}\text{C}$  NMR (100 MHz, DMSO- $d_6$ )  $\delta$  174.7, 170.2, 168.6, 157.1, 152.6, 151.8, 142.5, 136.9, 136.0, 131.1 (q,  $J = 32.0$  Hz), 129.8, 129.6, 127.5, 123.9 (q,  $J = 4.3$  Hz), 122.2 (q,  $J = 273.7$  Hz), 122.0, 121.5, 115.2, 115.0, 106.6, 71.5, 61.6, 40.7, 39.1, 35.1, 26.3, 25.2, 22.5, 21.1, 18.1, 13.6.  $^{19}\text{F}$  NMR (376 MHz, DMSO- $d_6$ )  $\delta$  -60.97 (s, 3F). HRMS (ESI-TOF): Anal Calcd. For.  $\text{C}_{36}\text{H}_{38}\text{F}_3\text{N}_5\text{O}_7\text{S}+\text{H}^+$ : 742.2517, found: 742.2517. IR (neat,  $\text{cm}^{-1}$ ):  $\nu$  3257, 2966, 1719, 1555, 1410, 1313, 1140, 1007, 758, 693.

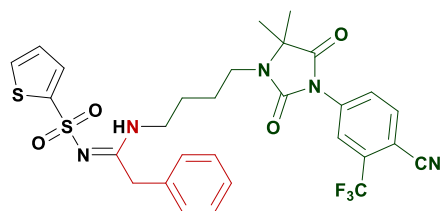

**N-(4-(3-(4-cyano-3-(trifluoromethyl)phenyl)-5,5-dimethyl-2,4-dioximidazolidin-1-yl)butyl)-2-phenyl-N'-(thiophen-2-ylsulfonyl)acetimidamide (7b)**

Yellow oil (100.9 mg, 80% yield, eluent: PE/EA = 1:2).  $^1\text{H}$  NMR (400 MHz, DMSO- $d_6$ )  $\delta$  8.92 (t,  $J = 5.5$  Hz, 1H), 8.31 – 8.29 (m, 1H), 8.20 – 8.19 (m, 1H), 8.06 – 8.03 (m, 1H), 7.73 – 7.71 (m, 1H), 7.38 – 7.37 (m, 1H), 7.30 – 7.26 (m, 4H), 7.24 – 7.19 (m, 1H), 7.01 – 6.98 (m, 1H), 4.09 (s, 2H), 3.33 – 3.28 (m, 4H), 1.63 – 1.58 (m, 4H), 1.43 (s, 6H).  $^{13}\text{C}$  NMR (100 MHz, DMSO- $d_6$ )  $\delta$  174.7, 165.9, 152.5, 146.0, 136.8, 136.0, 135.3, 131.1 (q,  $J = 32.5$  Hz), 130.8, 129.8, 129.2, 128.6, 128.4, 126.9, 126.7, 123.9 (q,  $J = 4.8$  Hz), 122.3 (q,  $J = 273.6$  Hz), 115.2, 106.6 (d,  $J = 2.3$  Hz), 61.6, 41.0, 39.1, 38.2, 26.4, 25.2, 22.5.  $^{19}\text{F}$  NMR (376 MHz, DMSO- $d_6$ )  $\delta$  -60.93 (s, 3F). HRMS (ESI-TOF): Anal Calcd. For.  $\text{C}_{29}\text{H}_{28}\text{F}_3\text{N}_5\text{O}_4\text{S}_2+\text{Na}^+$ : 654.1427, found: 654.1432. IR (neat,  $\text{cm}^{-1}$ ):  $\nu$  3251, 2937, 1718, 1558, 1409, 1313, 1132, 1023, 727, 617.

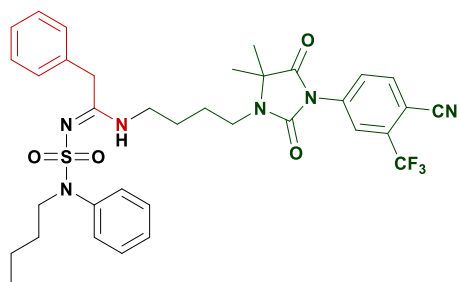

***N'*-(*N*-butyl-*N*-phenylsulfamoyl)-*N*-(4-(3-(4-cyano-3-(trifluoromethyl)phenyl)-5,5-dimethyl-2,4-dioxoimidazolidin-1-yl)butyl)-2-phenylacetimidamide (7c)**

Yellow oil (115.4 mg, 83% yield, eluent: PE/EA = 1:1.5).  $^1\text{H NMR}$  (400 MHz,  $\text{DMSO-}d_6$ )  $\delta$  8.42 (t,  $J = 5.5$  Hz, 1H), 8.30 – 8.28 (m, 1H), 8.22 – 8.21 (m, 1H), 8.07 – 8.04 (m, 1H), 7.39 – 7.37 (m, 2H), 7.36 – 7.34 (m, 2H), 7.27 – 7.25 (m, 4H), 7.24 – 7.22 (m, 1H), 7.21 – 7.17 (m, 1H), 3.88 (s, 2H), 3.52 (t,  $J = 6.6$  Hz, 2H), 3.36 – 3.27 (m, 4H), 1.67 – 1.55 (m, 4H), 1.45 (s, 6H), 1.29 – 1.20 (m, 4H), 0.78 (t,  $J = 7.0$  Hz, 3H).  $^{13}\text{C NMR}$  (100 MHz,  $\text{DMSO-}d_6$ )  $\delta$  174.6, 165.6, 152.5, 141.5, 136.9, 136.0, 135.7, 131.1 (q,  $J = 32.5$  Hz), 129.7, 128.7, 128.5, 128.2, 128.0, 126.7, 126.5, 123.8 (q,  $J = 4.7$  Hz), 122.2 (q,  $J = 273.7$  Hz), 115.2, 106.6, 61.6, 49.7, 40.8, 39.2, 38.0, 29.6, 26.6, 25.3, 22.5, 19.2, 13.4.  $^{19}\text{F NMR}$  (376 MHz,  $\text{DMSO-}d_6$ )  $\delta$  -61.00 (s, 3F). **HRMS** (ESI-TOF): Anal Calcd. For.  $\text{C}_{35}\text{H}_{39}\text{F}_3\text{N}_6\text{O}_4\text{S}+\text{Na}^+$ : 719.2598, found: 719.2574. **IR** (neat,  $\text{cm}^{-1}$ ):  $\nu$  3263, 2934, 1720, 1562, 1409, 1312, 1130, 1026, 889, 697, 628.

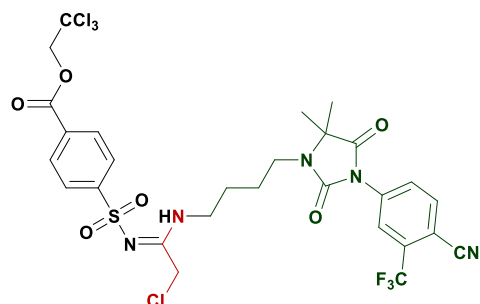

**2,2,2-trichloroethyl 4-(*N*-(2-chloro-1-((4-(3-(4-cyano-3-(trifluoromethyl)phenyl)-5,5-dimethyl-2,4-dioxoimidazolidin-1-yl)butyl)amino)ethylidene)sulfamoyl)benzoate (7d)**

Yellow oil (67.7 mg, 45% yield, eluent: PE/EA = 1:2).  $^1\text{H NMR}$  (400 MHz,  $\text{DMSO-}d_6$ )  $\delta$  9.34 (t,  $J = 5.5$  Hz, 1H), 8.31 – 8.28 (m, 1H), 8.17 – 8.14 (m, 3H), 8.05 – 8.01 (m, 3H), 5.15 (s, 2H), 4.64 (s, 2H), 3.29 – 3.24 (m, 4H), 1.61 – 1.52 (m, 4H), 1.41 (s, 6H).  $^{13}\text{C NMR}$  (100 MHz,  $\text{DMSO-}d_6$ )  $\delta$  174.6, 163.2, 162.1, 152.6, 148.4, 136.8, 136.0, 131.1 (q,  $J = 32.3$  Hz), 130.8, 130.1, 129.8, 126.5, 123.9 (q,  $J = 4.9$  Hz), 122.2 (q,  $J = 273.7$  Hz), 115.2, 106.7, 95.1, 73.9, 61.6, 41.2, 39.0, 38.8, 26.2, 24.9, 22.5.  $^{19}\text{F NMR}$  (376 MHz,  $\text{DMSO-}d_6$ )  $\delta$  -60.93 (s, 3F). **HRMS** (ESI-TOF): Anal Calcd. For.  $\text{C}_{28}\text{H}_{26}\text{Cl}_4\text{F}_3\text{N}_5\text{O}_6\text{S}+\text{Na}^+$ : 780.0202, found: 780.0218. Anal Calcd. For.  $\text{C}_{28}\text{H}_{26}^{37}\text{ClCl}_3\text{F}_3\text{N}_5\text{O}_6\text{S}+\text{Na}^+$ : 782.0173, found: 782.0163. **IR** (neat,  $\text{cm}^{-1}$ ):  $\nu$  3331, 2923, 1719, 1576, 1410, 1261, 1142, 1025, 762, 651.

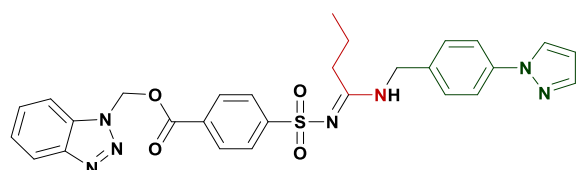

**(1*H*-benzo[*d*][1,2,3]triazol-1-yl)methyl-4-(*N*-(1-((4-(1*H*-pyrazol-1-yl)benzyl)amino)butylidene)sulfamoyl)benzoate (7e)**

White solid (83.0 mg, 74% yield, eluent: PE/EA = 1:2). mp: 70-72 °C. <sup>1</sup>H NMR (400 MHz, DMSO-*d*<sub>6</sub>) δ 9.32 (t, *J* = 5.6 Hz, 1H), 8.43 – 8.42 (m, 1H), 8.13 – 8.11 (m, 1H), 8.07 – 8.02 (m, 3H), 7.84 – 7.82 (m, 2H), 7.75 – 7.71 (m, 3H), 7.68 – 7.64 (m, 1H), 7.50 – 7.46 (m, 1H), 7.31 – 7.29 (m, 2H), 7.00 – 6.96 (m, 2H), 6.53 – 6.51 (m, 1H), 4.37 (d, *J* = 5.5 Hz, 2H), 2.67 (t, *J* = 7.6 Hz, 2H), 1.69 – 1.59 (m, 2H), 0.87 (t, *J* = 7.4 Hz, 3H). <sup>13</sup>C NMR (100 MHz, DMSO-*d*<sub>6</sub>) δ 168.9, 163.9, 148.8, 145.3, 140.9, 138.8, 135.3, 132.8, 130.7, 130.1, 128.7, 128.4, 127.6, 126.1, 124.7, 119.4, 118.3, 111.0, 107.8, 69.4, 44.2, 35.1, 21.0, 13.6. HRMS (ESI-TOF): Anal Calcd. For. C<sub>28</sub>H<sub>27</sub>N<sub>7</sub>O<sub>4</sub>S+Na<sup>+</sup>: 580.1737, found: 580.1733. IR (neat, cm<sup>-1</sup>): ν 3392, 2964, 1735, 1559, 1262, 1147, 1023, 822, 743, 651.

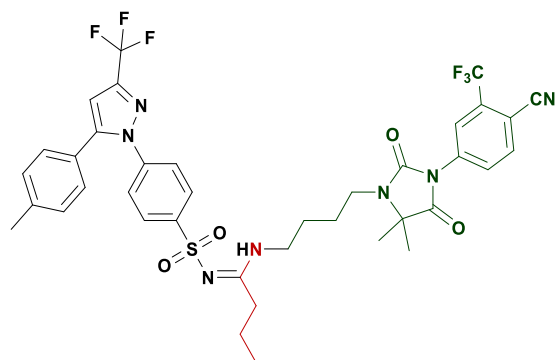

***N*-(4-(3-(4-cyano-3-(trifluoromethyl)phenyl)-5,5-dimethyl-2,4-dioxoimidazolidin-1-yl)butyl)-*N'*-((4-(5-(*p*-tolyl)-3-(trifluoromethyl)-1*H*-pyrazol-1-yl)phenyl)sulfonyl)butyrimidamide (7f)**

Colorless oil (151.3 mg, 94% yield, eluent: PE/EA = 1:2). <sup>1</sup>H NMR (400 MHz, DMSO-*d*<sub>6</sub>) δ 8.78 (t, *J* = 5.4 Hz, 1H), 8.28 – 8.26 (m, 1H), 8.19 – 8.18 (m, 1H), 8.04 – 8.02 (m, 1H), 7.89 – 7.87 (m, 2H), 7.49 – 7.47 (m, 2H), 7.20 – 7.16 (m, 4H), 7.14 – 7.13 (m, 1H), 3.30 (t, *J* = 7.1 Hz, 2H), 3.23 (q, *J* = 6.2 Hz, 2H), 2.65 – 2.61 (m, 2H), 2.29 (s, 3H), 1.66 – 1.53 (m, 6H), 1.44 (s, 6H), 0.88 (t, *J* = 7.3 Hz, 3H). <sup>13</sup>C NMR (100 MHz, DMSO-*d*<sub>6</sub>) δ 174.6, 168.8, 152.5, 145.1, 144.5, 142.2 (q, *J* = 37.3 Hz), 140.8, 139.0, 136.8, 135.9, 131.1 (q, *J* = 32.3 Hz), 129.7, 129.3, 128.7, 126.8, 125.8, 125.3, 123.8 (q, *J* = 4.5 Hz), 122.2 (q, *J* = 273.6 Hz), 121.3 (q, *J* = 268.6 Hz), 115.2, 106.6, 105.9, 61.6, 40.7, 39.1, 35.1, 26.3, 25.2, 22.5, 21.0, 20.7, 13.5. <sup>19</sup>F NMR (376 MHz, DMSO-*d*<sub>6</sub>) δ -61.03 (s, 3F), -61.07 (s, 3F). HRMS (ESI-TOF): Anal Calcd. For. C<sub>38</sub>H<sub>37</sub>F<sub>6</sub>N<sub>7</sub>O<sub>4</sub>S+H<sup>+</sup>: 802.2605, found: 802.2597. IR (neat, cm<sup>-1</sup>): ν 3254, 2964, 1720, 1553, 1410, 1271, 1134, 1026, 820, 762, 661.

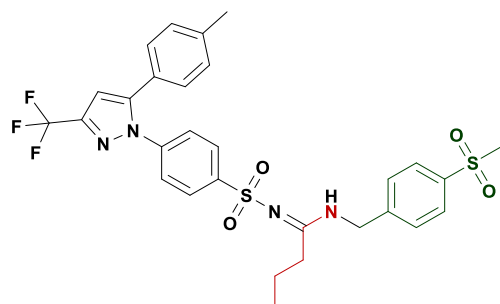

***N*-(4-(methylsulfonyl)benzyl)-*N'*-((4-(5-(*p*-tolyl)-3-(trifluoromethyl)-1*H*-pyrazol-1-yl)phenyl)sulfonyl)butyrimidamide (7g)**

White oil (104.4 mg, 84% yield, eluent: PE/EA = 1:2). **<sup>1</sup>H NMR** (400 MHz, DMSO-*d*<sub>6</sub>) δ 9.36 (t, *J* = 5.7 Hz, 1H), 7.86 – 7.84 (m, 2H), 7.73 – 7.71 (m, 2H), 7.48 – 7.46 (m, 2H), 7.46 – 7.44 (m, 2H), 7.22 – 7.18 (m, 4H), 7.18 – 7.17 (m, 1H), 4.48 (d, *J* = 5.6 Hz, 2H), 3.17 (s, 3H), 2.73 – 2.69 (m, 2H), 2.30 (s, 3H), 1.71 – 1.61 (m, 2H), 0.90 (t, *J* = 7.3 Hz, 3H). **<sup>13</sup>C NMR** (100 MHz, DMSO-*d*<sub>6</sub>) δ 169.1, 145.2, 144.0, 143.7, 142.2 (q, *J* = 37.7 Hz), 140.9, 139.7, 139.1, 129.4, 128.7, 128.3, 127.1, 126.8, 125.8, 125.4, 121.3 (q, *J* = 268.9 Hz), 106.0, 44.2, 43.5, 35.0, 20.9, 20.8, 13.6. **<sup>19</sup>F NMR** (376 MHz, DMSO-*d*<sub>6</sub>) δ -60.90 (s, 3F). **HRMS** (ESI-TOF): Anal Calcd. For. C<sub>29</sub>H<sub>29</sub>F<sub>3</sub>N<sub>4</sub>O<sub>4</sub>S<sub>2</sub>+H<sup>+</sup>: 619.1655, found: 619.1646. **IR** (neat, cm<sup>-1</sup>): ν 3252, 2966, 1548, 1471, 1373, 1202, 1145, 1007, 762, 657.

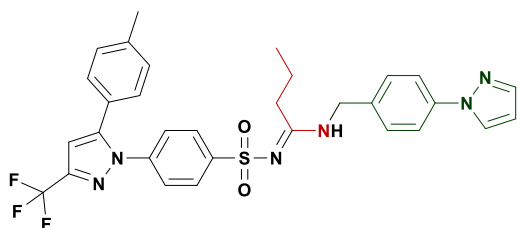

***N*-(4-(1*H*-pyrazol-1-yl)benzyl)-*N'*-((4-(5-(*p*-tolyl)-3-(trifluoromethyl)-1*H*-pyrazol-1-yl)phenyl)sulfonyl)butyrimidamide (7h)**

White oil (94.1 mg, 78% yield, eluent: PE/EA = 1:1.5). **<sup>1</sup>H NMR** (400 MHz, DMSO-*d*<sub>6</sub>) δ 9.31 (t, *J* = 5.7 Hz, 1H), 8.41 – 8.40 (m, 1H), 7.80 – 7.77 (m, 2H), 7.76 – 7.73 (m, 2H), 7.71 – 7.70 (m, 1H), 7.47 – 7.44 (m, 2H), 7.33 – 7.31 (m, 2H), 7.17 – 7.15 (m, 4H), 7.15 – 7.14 (m, 1H), 6.51 – 6.49 (m, 1H), 4.40 (d, *J* = 5.5 Hz, 2H), 2.73 – 2.69 (m, 2H), 2.26 (s, 3H), 1.71 – 1.61 (m, 2H), 0.90 (t, *J* = 7.3 Hz, 3H). **<sup>13</sup>C NMR** (100 MHz, DMSO-*d*<sub>6</sub>) δ 168.7, 145.2, 144.2, 142.2 (q, *J* = 37.8 Hz), 140.84, 140.79, 139.0, 138.8, 135.5, 129.3, 128.8, 128.7, 127.5, 126.8, 125.8, 125.3, 121.3 (q, *J* = 268.8 Hz), 118.3, 107.7, 106.0, 44.2, 35.0, 21.0, 20.7, 13.6. **<sup>19</sup>F NMR** (376 MHz, DMSO-*d*<sub>6</sub>) δ -60.89 (s, 3F). **HRMS** (ESI-TOF): Anal Calcd. For. C<sub>31</sub>H<sub>29</sub>F<sub>3</sub>N<sub>6</sub>O<sub>2</sub>S+Na<sup>+</sup>: 629.1917, found: 629.1911. **IR** (neat, cm<sup>-1</sup>): ν 3253, 2964, 1550, 1471, 1372, 1236, 1094, 975, 762, 656.

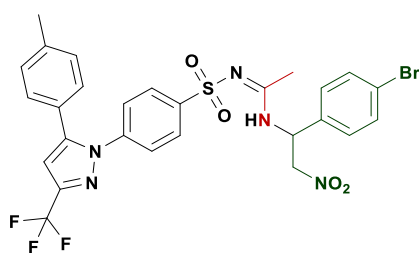

***N*-(1-(4-bromophenyl)-2-nitroethyl)-*N'*-((4-(5-(*p*-tolyl)-3-(trifluoromethyl)-1*H*-pyrazol-1-yl)phenyl)sulfonyl)acetimidamide (7i)**

White solid (61.6 mg, 47% yield, eluent: PE/EA = 1:1). mp: 110-112 °C. **<sup>1</sup>H NMR** (400 MHz, DMSO-*d*<sub>6</sub>) δ 9.56 (d, *J* = 7.4 Hz, 1H), 7.71 – 7.69 (m, 2H), 7.51 – 7.46 (m, 4H), 7.31 – 7.29 (m, 2H), 7.24 – 7.18 (m, 4H), 7.18 – 7.14 (m, 1H), 5.67 – 5.63 (m, 1H), 5.04 – 4.93 (m, 2H), 2.33 (s, 3H), 2.31 (s, 3H). **<sup>13</sup>C NMR** (100 MHz, DMSO-*d*<sub>6</sub>) δ 165.8, 145.2, 143.3, 142.3 (q, *J* = 38.3 Hz), 141.0, 139.1, 136.1, 131.6, 129.4, 129.3, 128.7, 126.8, 125.7, 125.4, 121.5, 121.3 (q, *J* = 268.4 Hz), 106.0, 76.7, 52.2, 20.8, 20.1. **<sup>19</sup>F NMR** (376 MHz, DMSO-*d*<sub>6</sub>) δ -60.95 (s, 3F). **HRMS** (ESI-TOF): Anal Calcd. For. C<sub>27</sub>H<sub>23</sub>BrF<sub>3</sub>N<sub>5</sub>O<sub>4</sub>S+H<sup>+</sup>: 650.0679, found: 650.0660. Anal Calcd. For.

C<sub>27</sub>H<sub>23</sub><sup>81</sup>BrF<sub>3</sub>N<sub>5</sub>O<sub>4</sub>S+H<sup>+</sup>: 652.0659, found: 652.0656. **IR** (neat, cm<sup>-1</sup>): ν 3239, 2921, 1552, 1376, 1236, 1150, 1024, 768, 672.

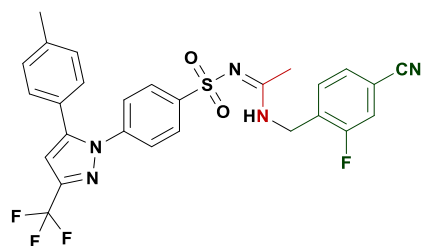

***N*-(4-cyano-2-fluorobenzyl)-*N'*-((4-(5-(*p*-tolyl)-3-(trifluoromethyl)-1*H*-pyrazol-1-yl)phenyl)sulfonyl)acetimidamide (7j)**

Colorless liquid (98.5 mg, 89% yield, eluent: PE/EA = 1:2). <sup>1</sup>H NMR (400 MHz, DMSO-*d*<sub>6</sub>) δ 9.41 (t, *J* = 5.5 Hz, 1H), 7.78 – 7.74 (m, 3H), 7.60 – 7.57 (m, 1H), 7.50 – 7.47 (m, 2H), 7.47 – 7.41 (m, 1H), 7.21 – 7.19 (m, 4H), 7.17 – 7.16 (m, 1H), 4.46 (d, *J* = 5.5 Hz, 2H), 2.33 (s, 3H), 2.29 (s, 3H). <sup>13</sup>C NMR (100 MHz, DMSO-*d*<sub>6</sub>) δ 166.2, 159.6 (d, *J* = 248.7 Hz), 145.2, 143.5, 142.2 (q, *J* = 37.9 Hz), 141.0, 139.1, 131.2 (d, *J* = 4.6 Hz), 130.5 (d, *J* = 14.7 Hz), 129.4, 128.7, 128.5 (d, *J* = 3.6 Hz), 126.9, 125.8, 125.4, 121.3 (q, *J* = 269.0 Hz), 119.2 (d, *J* = 25.4 Hz), 117.5 (d, *J* = 2.7 Hz), 111.7 (d, *J* = 10.0 Hz), 106.0, 38.7 (d, *J* = 3.6 Hz), 20.8, 19.9. <sup>19</sup>F NMR (376 MHz, DMSO-*d*<sub>6</sub>) δ -60.96 (s, 3F), -115.20 (s, 1F). **HRMS** (ESI-TOF): Anal Calcd. For. C<sub>27</sub>H<sub>21</sub>F<sub>4</sub>N<sub>5</sub>O<sub>2</sub>S+H<sup>+</sup>: 556.1425, found: 556.1405. **IR** (neat, cm<sup>-1</sup>): ν 3240, 2919, 1553, 1417, 1237, 1151, 1025, 819, 765, 662.



## NMR spectra

$^1\text{H}$  NMR (400 MHz,  $\text{DMSO-}d_6$ ) of compound **4a**

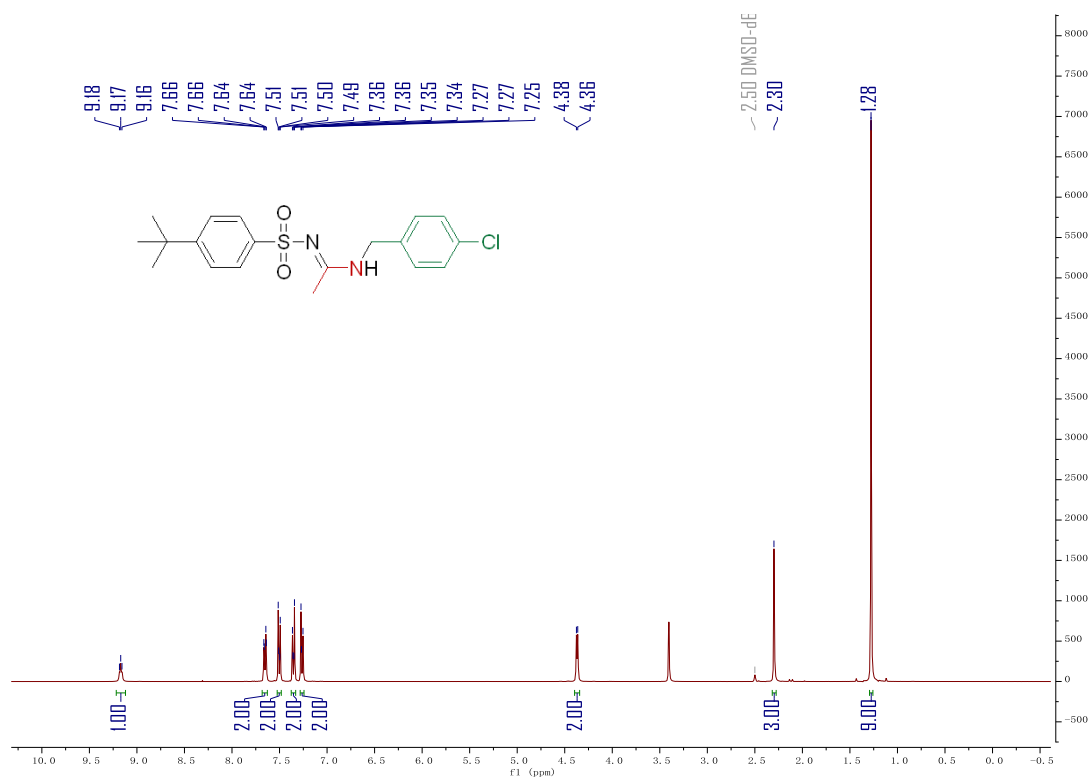

$^{13}\text{C}$  NMR (100 MHz,  $\text{DMSO-}d_6$ ) of compound **4a**

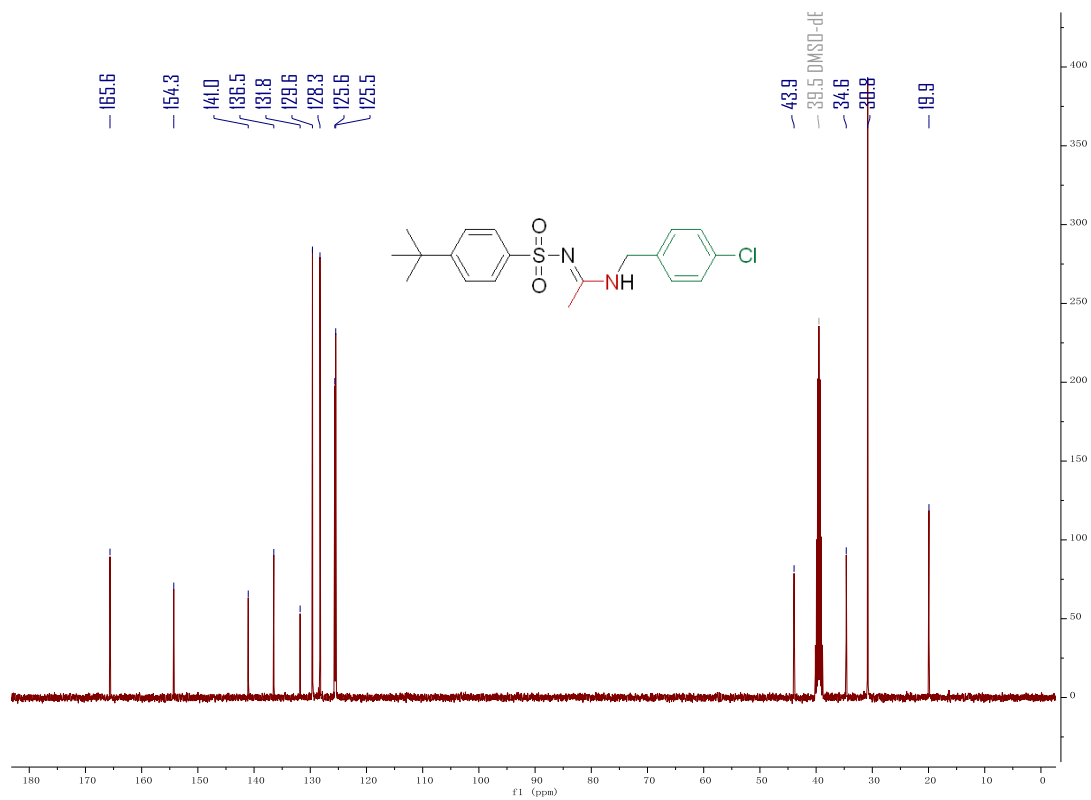

**<sup>1</sup>H NMR (400 MHz, DMSO-*d*<sub>6</sub>) of compound 4b**

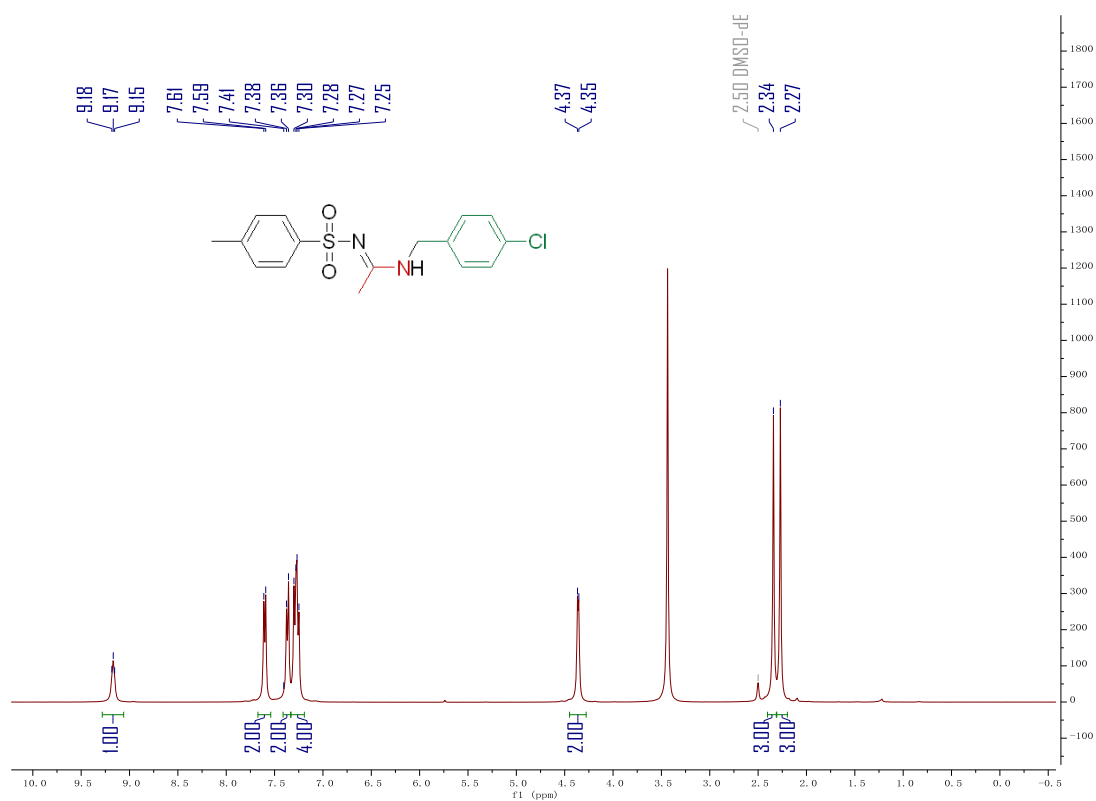

**<sup>13</sup>C NMR (100 MHz, DMSO-*d*<sub>6</sub>) of compound 4b**

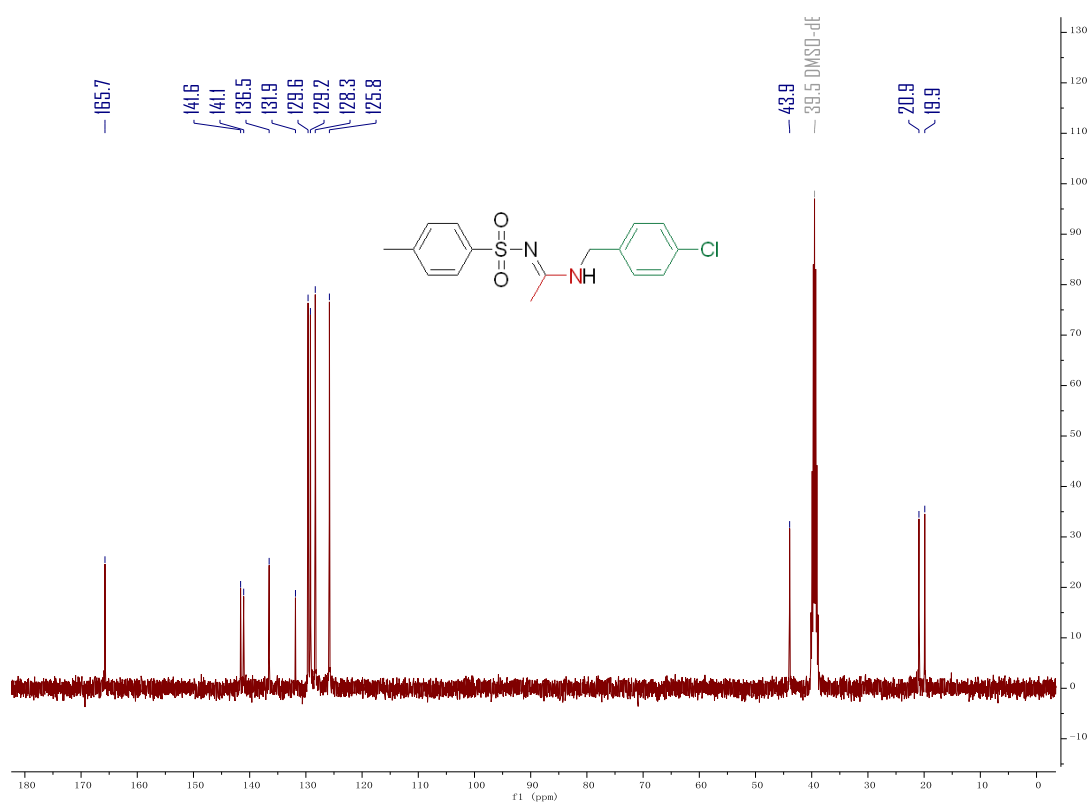

**<sup>1</sup>H NMR (400 MHz, DMSO-*d*<sub>6</sub>) of compound 4c**

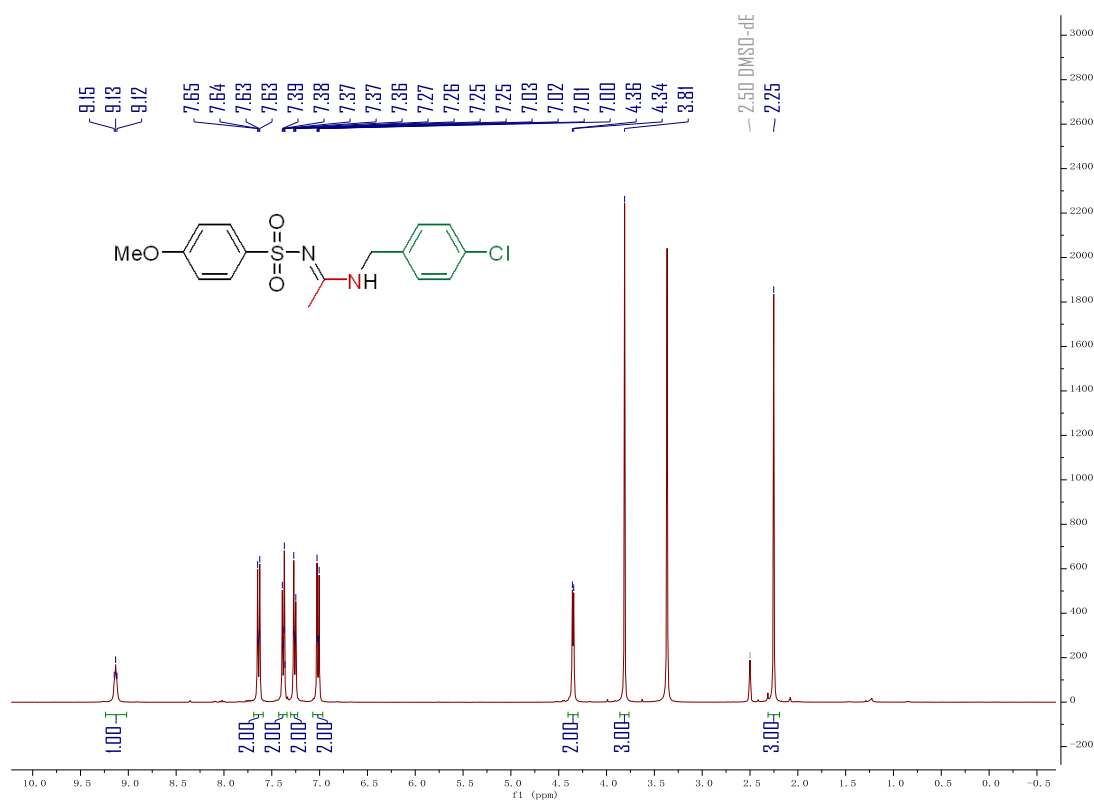

**<sup>13</sup>C NMR (100 MHz, DMSO-*d*<sub>6</sub>) of compound 4c**

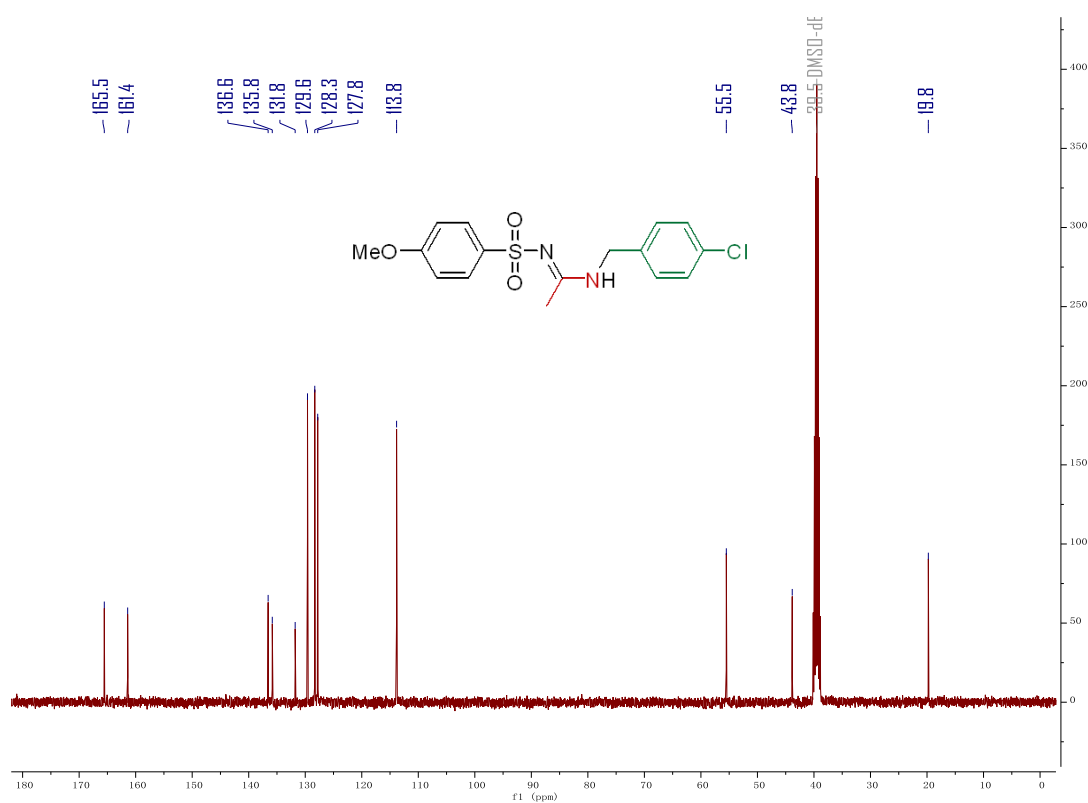



<sup>1</sup>H NMR (400 MHz, DMSO-d<sub>6</sub>) of compound 4e

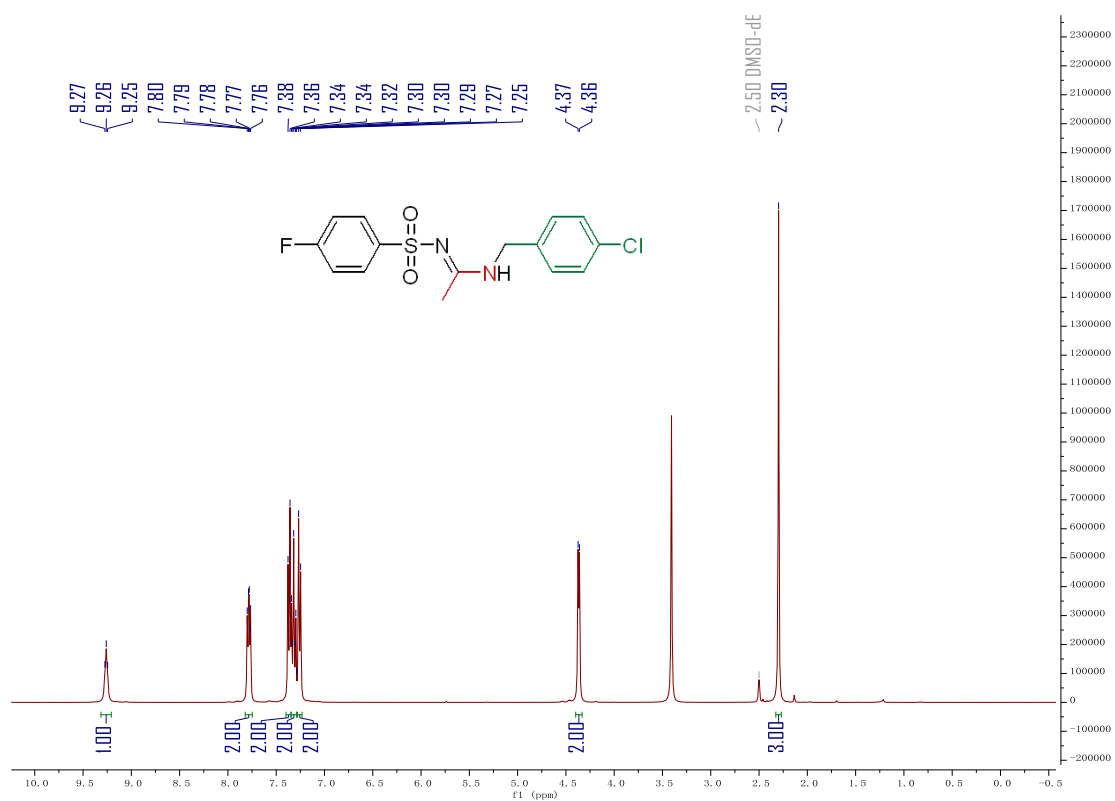

<sup>13</sup>C NMR (100 MHz, DMSO-d<sub>6</sub>) of compound 4e

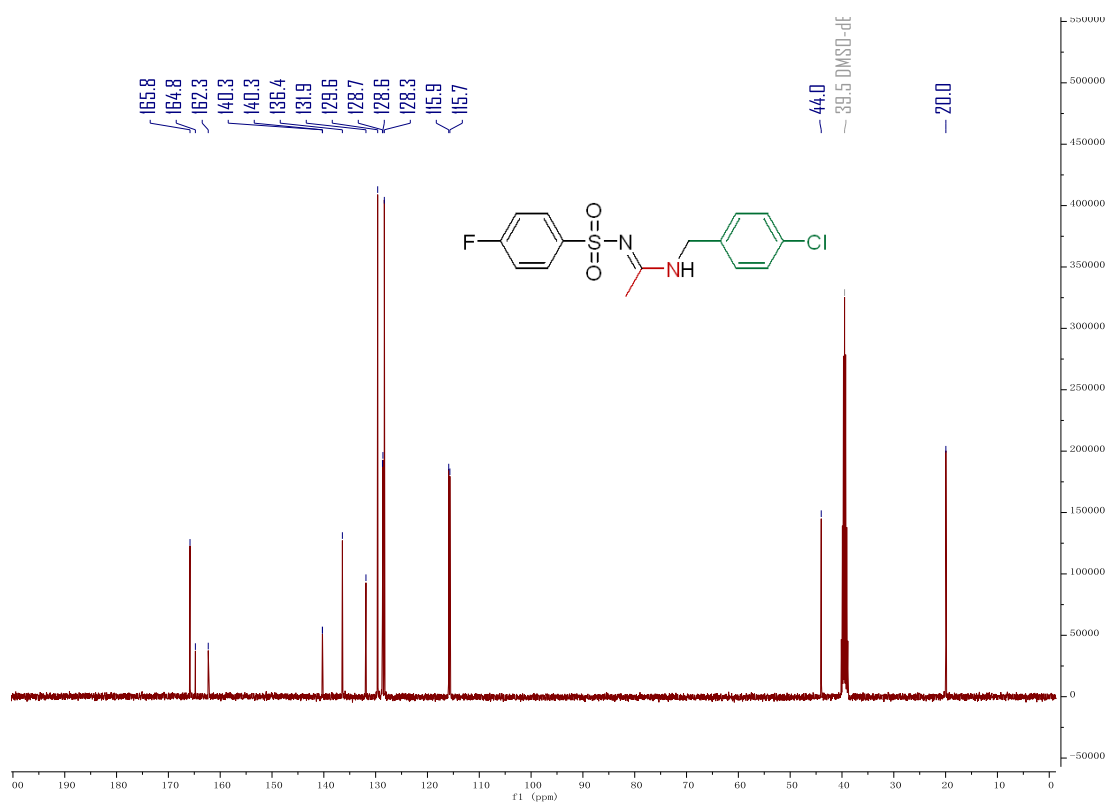

<sup>19</sup>F NMR (376 MHz, DMSO-*d*<sub>6</sub>) of compound **4e**

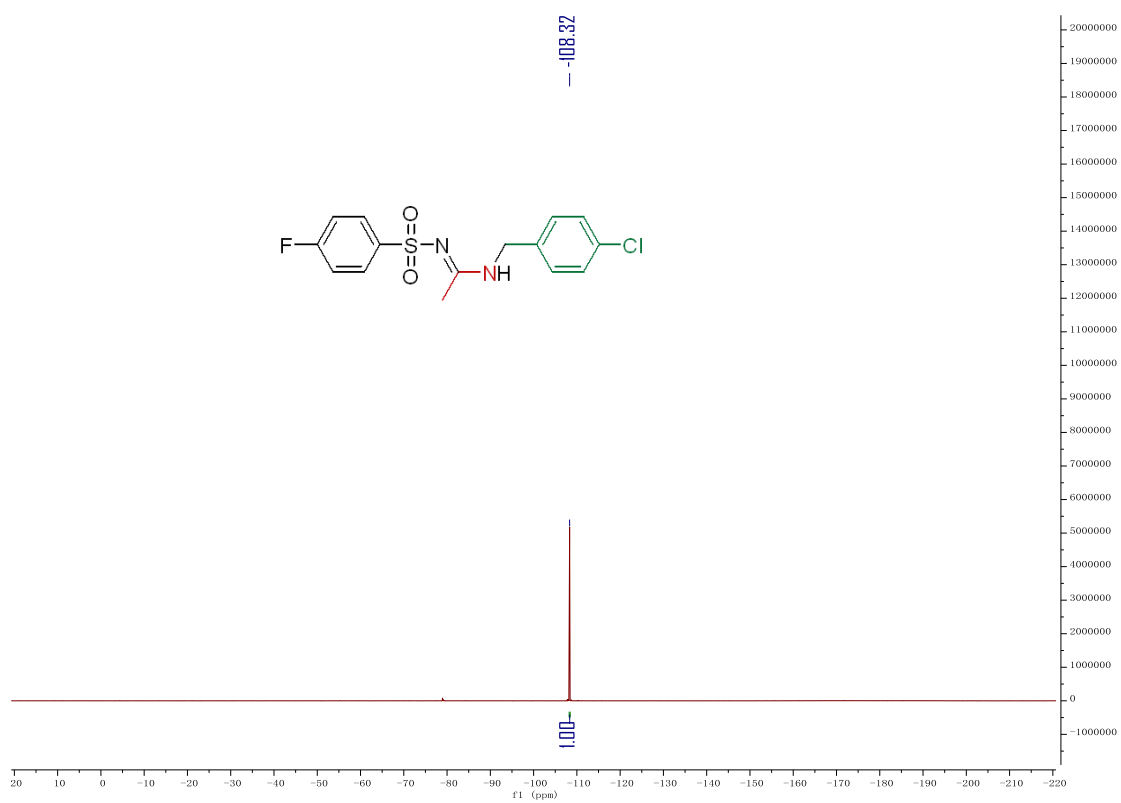

**<sup>1</sup>H NMR (400 MHz, DMSO-*d*<sub>6</sub>) of compound 4f**

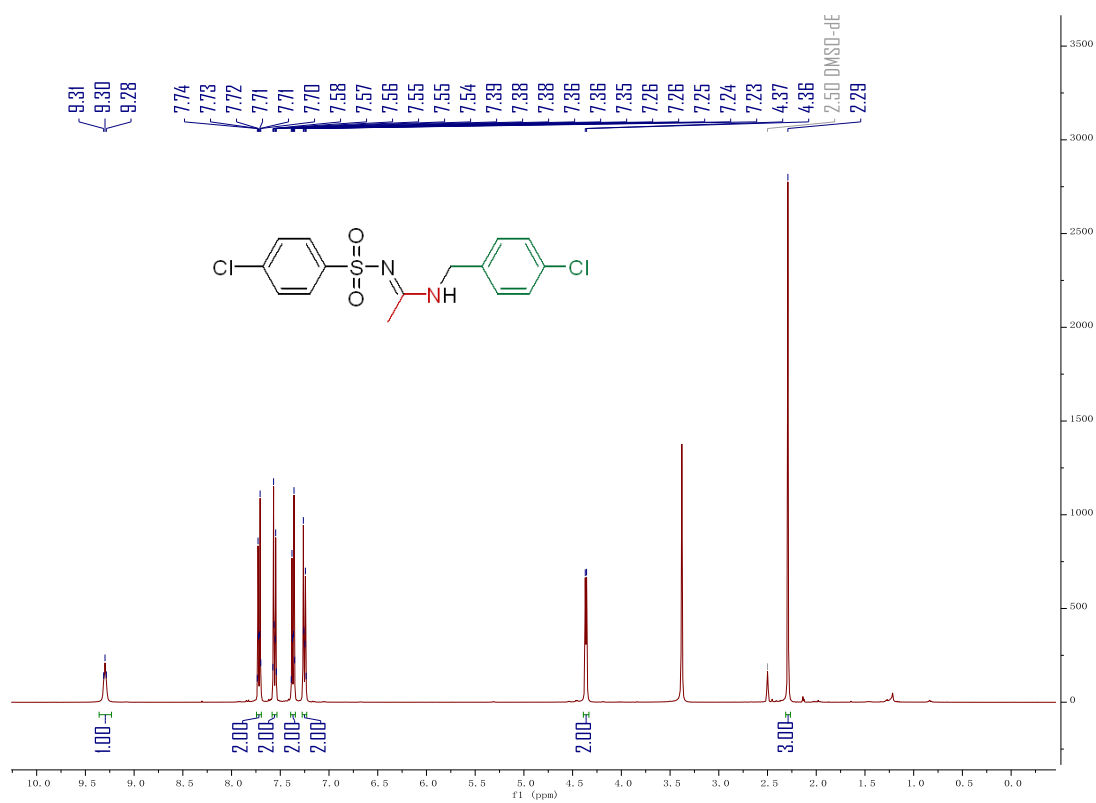

**<sup>13</sup>C NMR (100 MHz, DMSO-*d*<sub>6</sub>) of compound 4f**

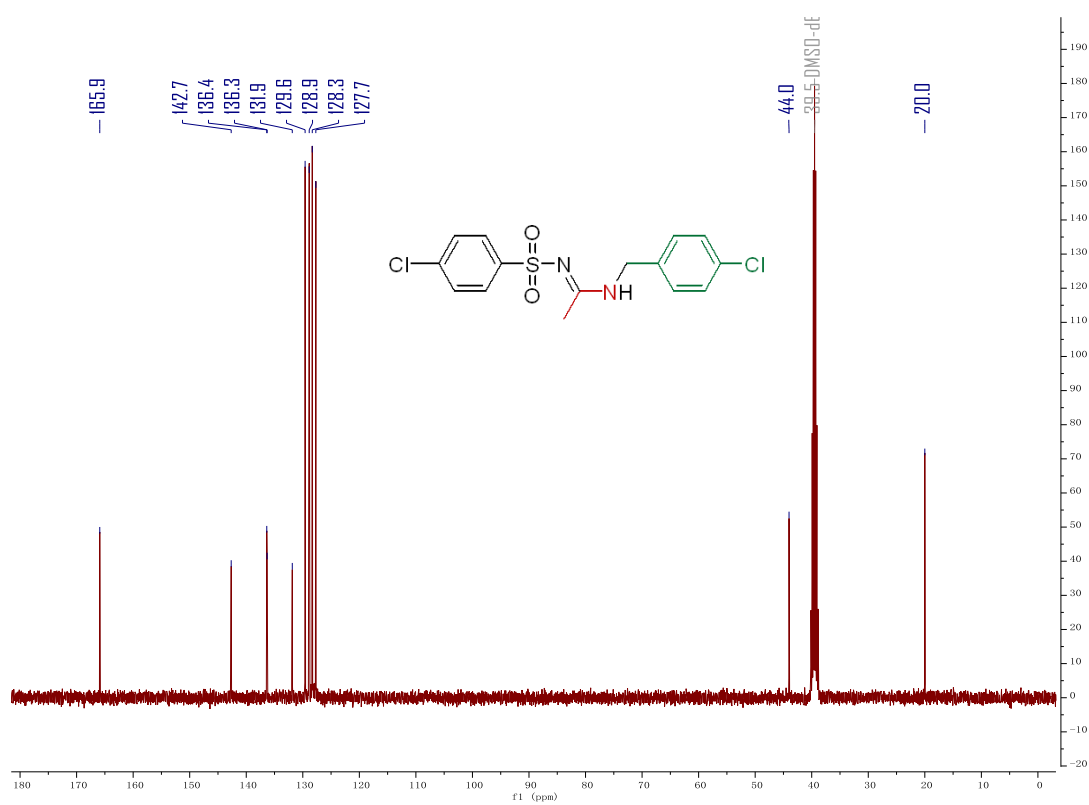

**<sup>1</sup>H NMR (400 MHz, DMSO-*d*<sub>6</sub>) of compound 4g**

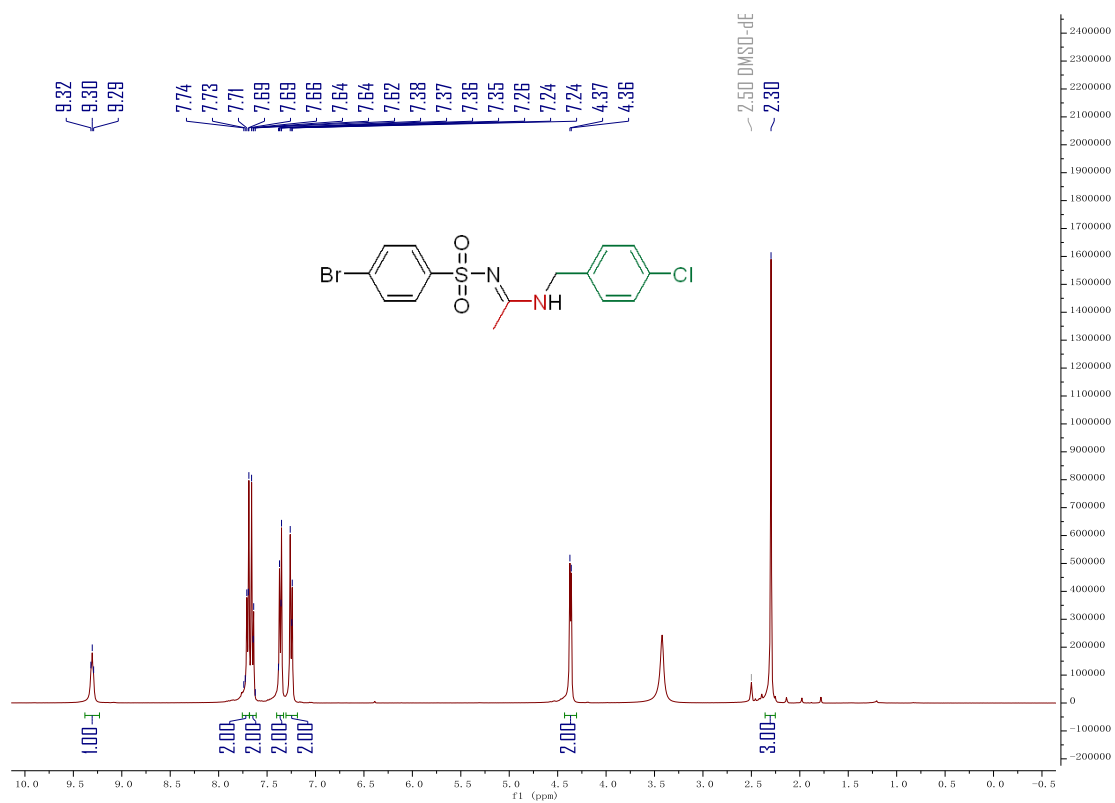

**<sup>13</sup>C NMR (100 MHz, DMSO-*d*<sub>6</sub>) of compound 4g**

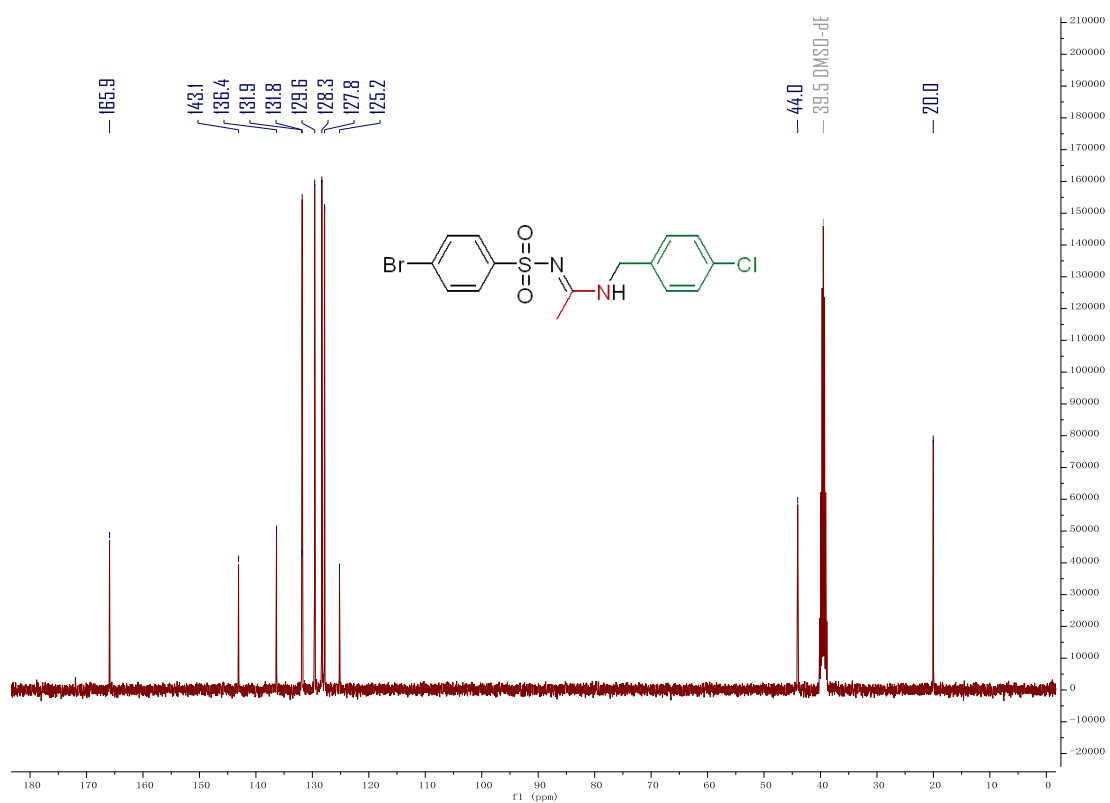



**<sup>1</sup>H NMR (400 MHz, DMSO-*d*<sub>6</sub>) of compound 4h**

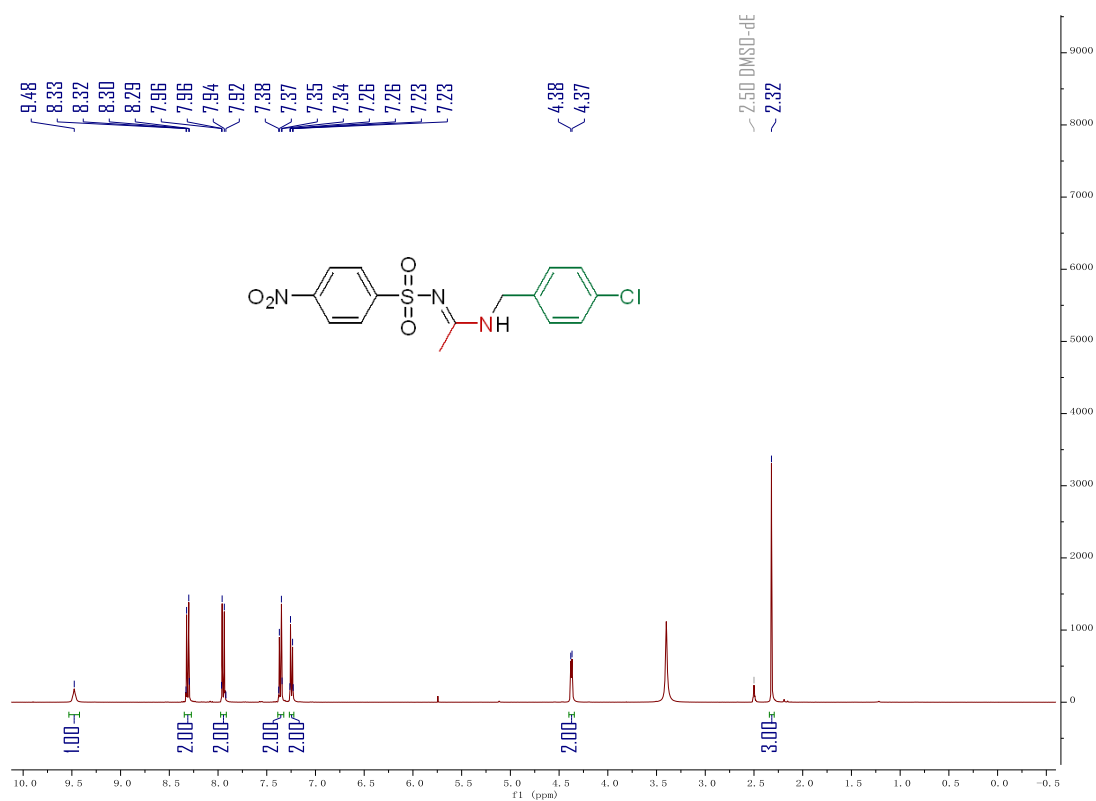

**<sup>13</sup>C NMR (100 MHz, DMSO-*d*<sub>6</sub>) of compound 4h**

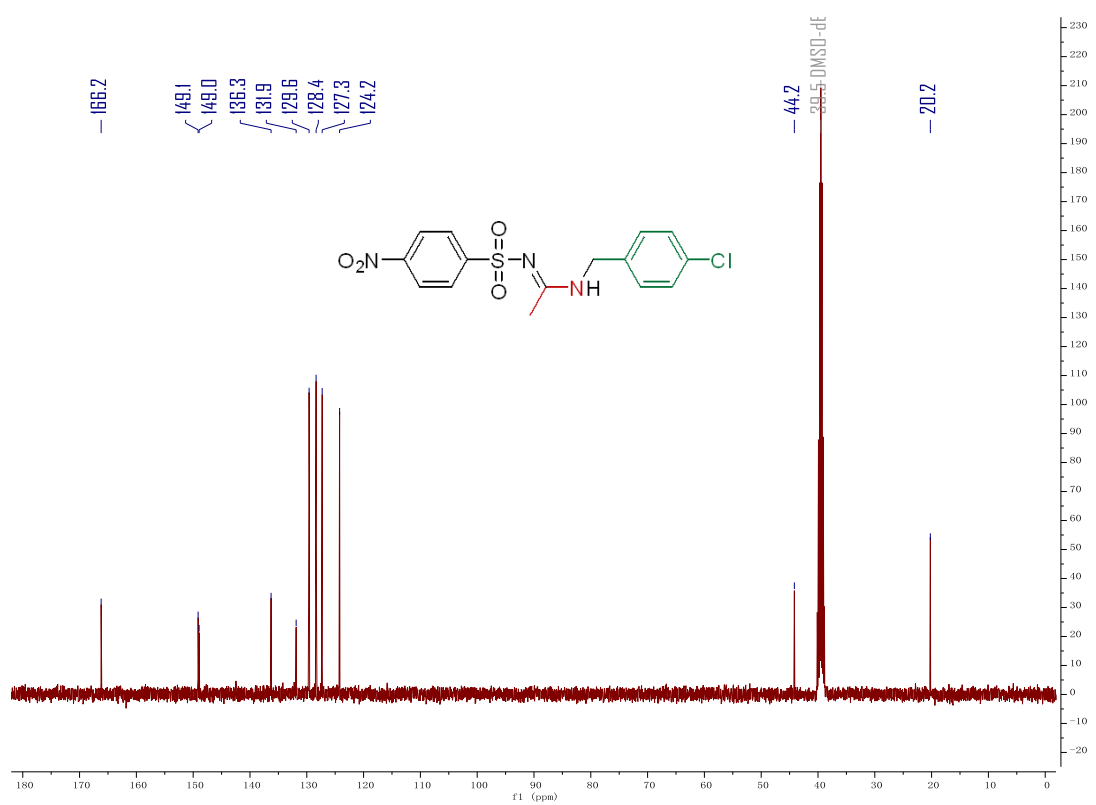

**<sup>1</sup>H NMR (400 MHz, DMSO-*d*<sub>6</sub>) of compound 4i**

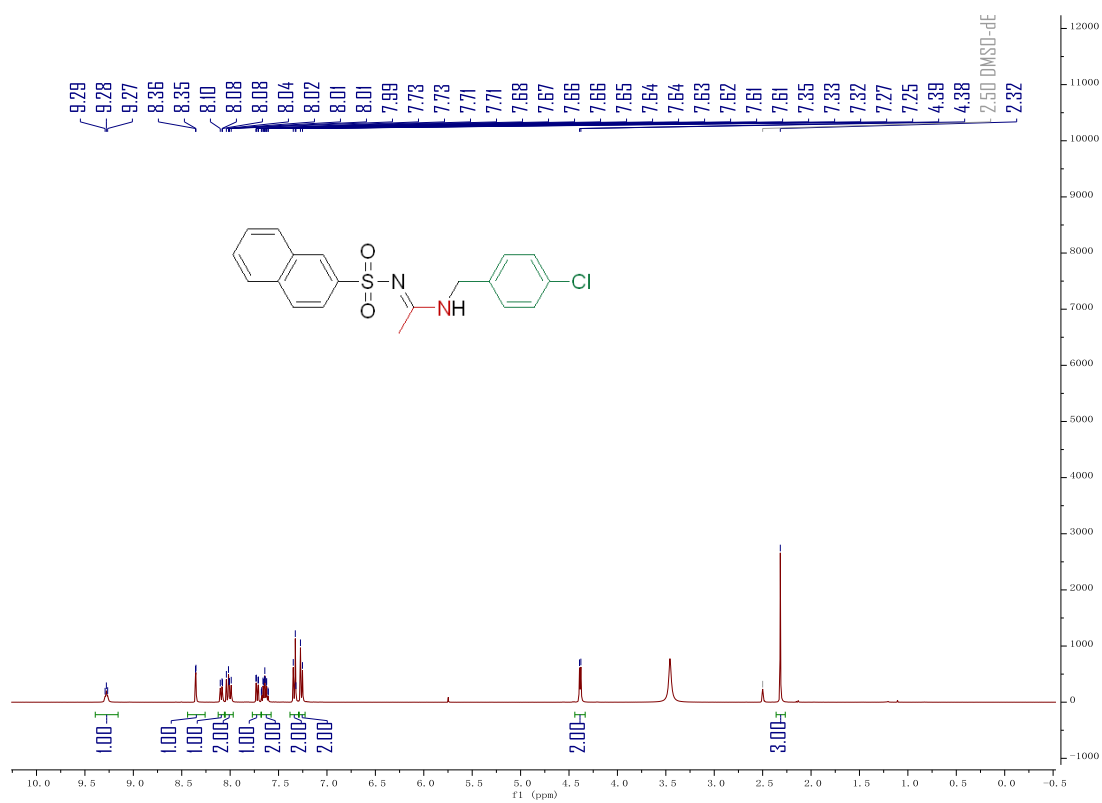

**<sup>13</sup>C NMR (100 MHz, DMSO-*d*<sub>6</sub>) of compound 4i**

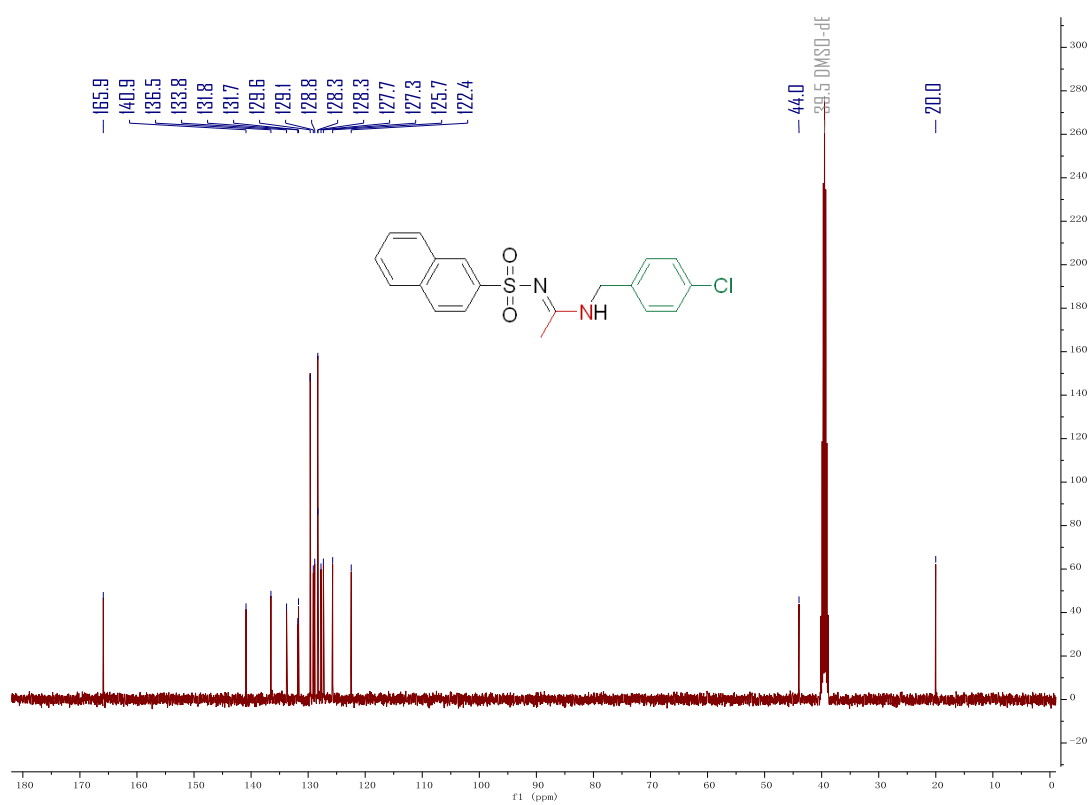

**<sup>1</sup>H NMR (400 MHz, DMSO-*d*<sub>6</sub>) of compound 4j**

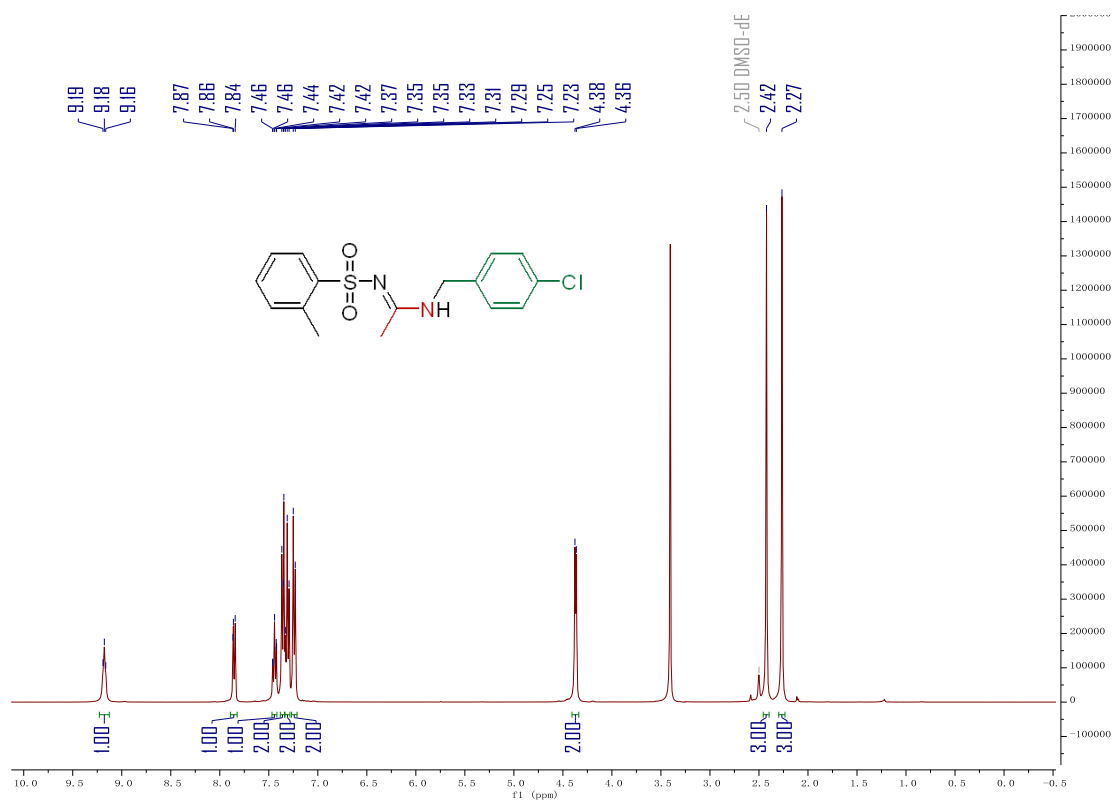

**<sup>13</sup>C NMR (100 MHz, DMSO-*d*<sub>6</sub>) of compound 4j**

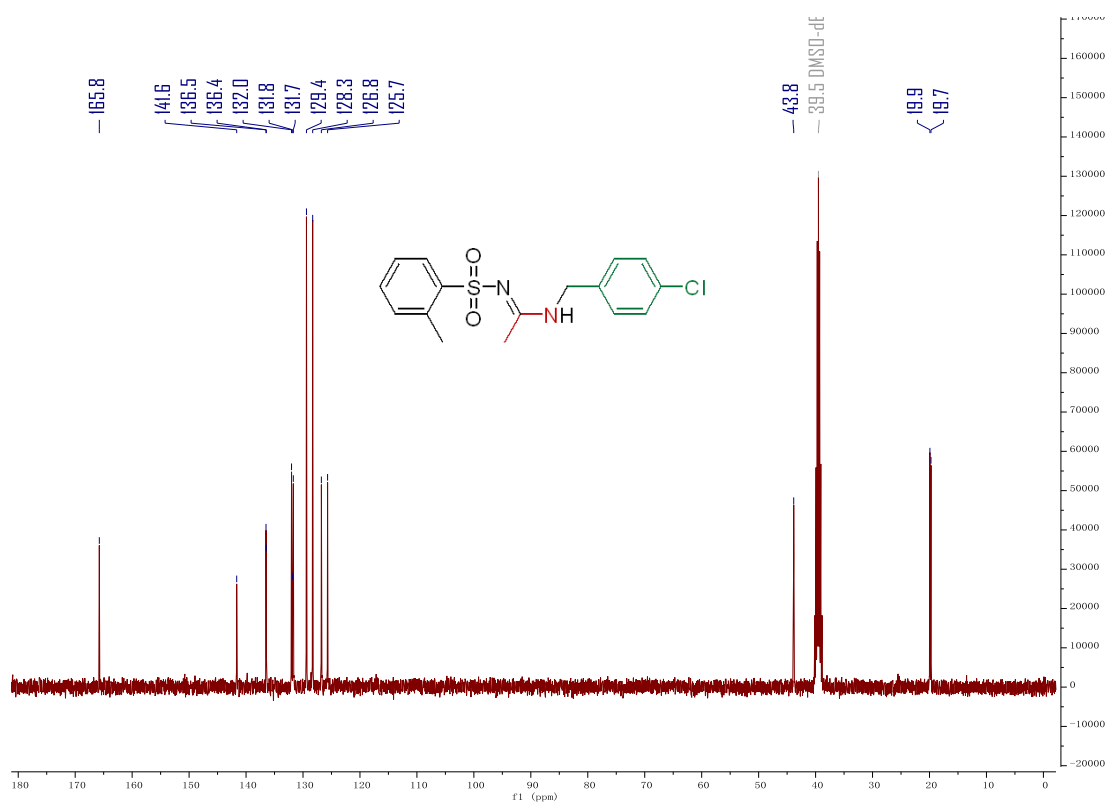

<sup>1</sup>H NMR (400 MHz, DMSO-*d*<sub>6</sub>) of compound **4k**

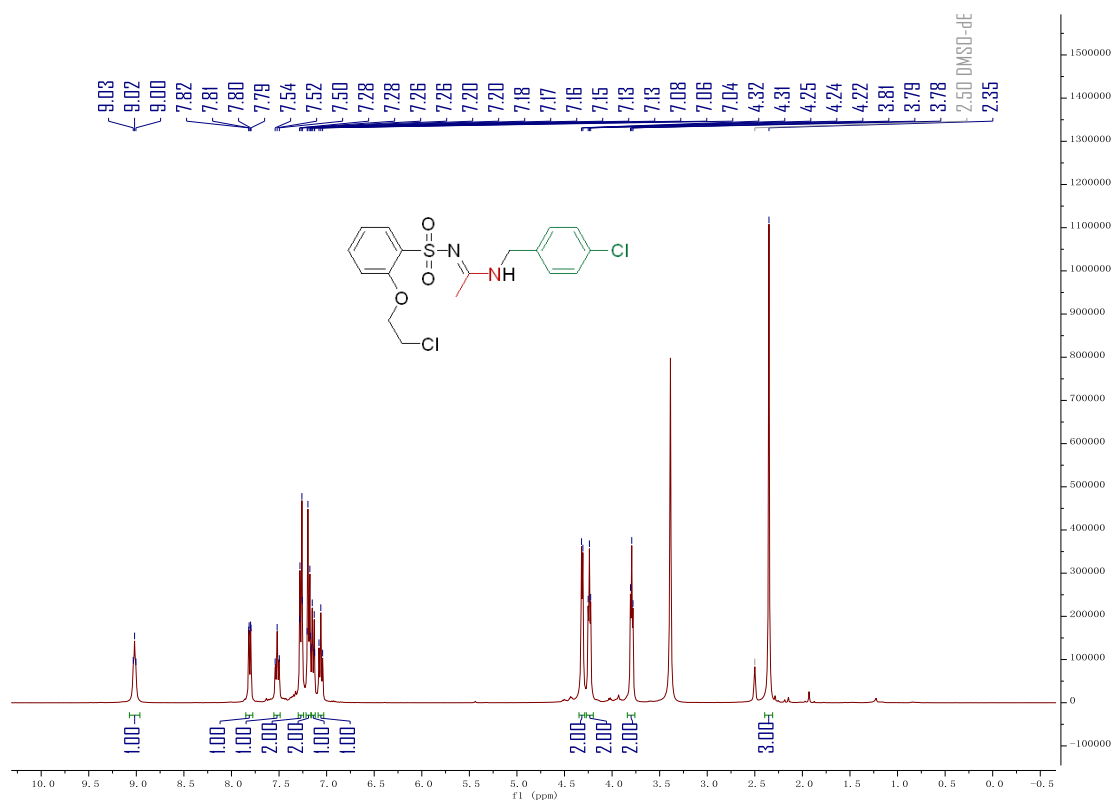

<sup>13</sup>C NMR (100 MHz, DMSO-*d*<sub>6</sub>) of compound **4k**

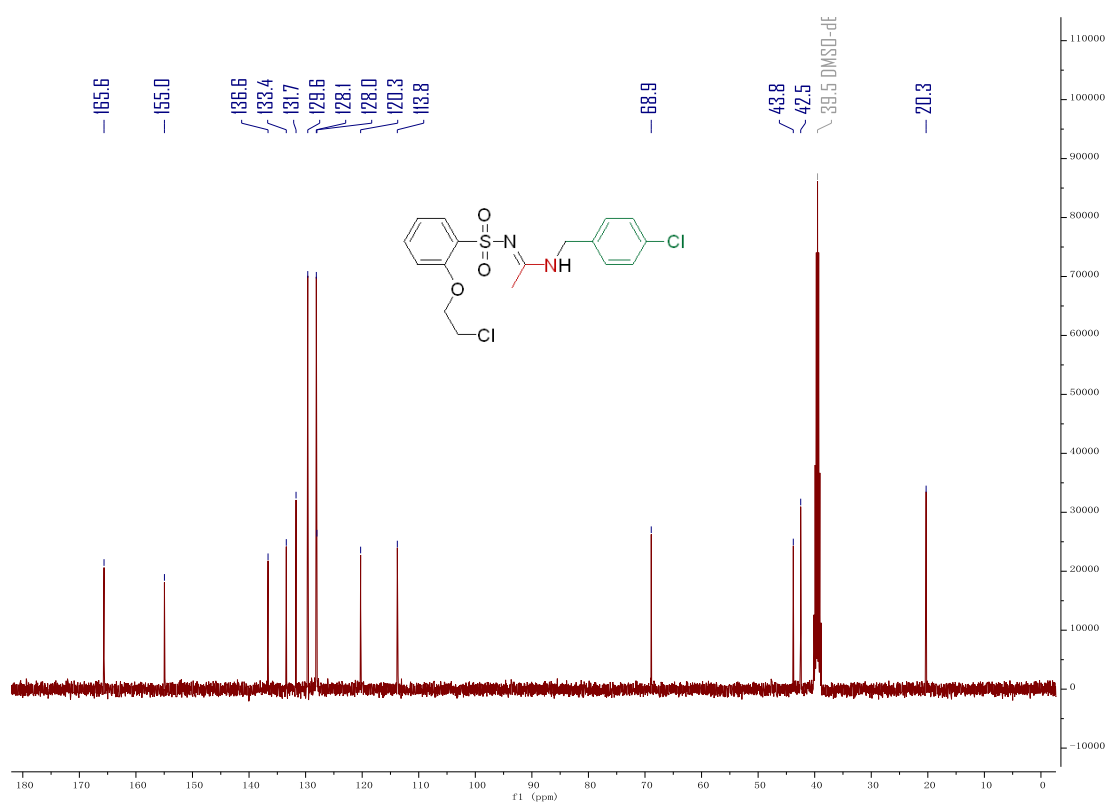

**<sup>1</sup>H NMR (400 MHz, DMSO-*d*<sub>6</sub>) of compound 4I**

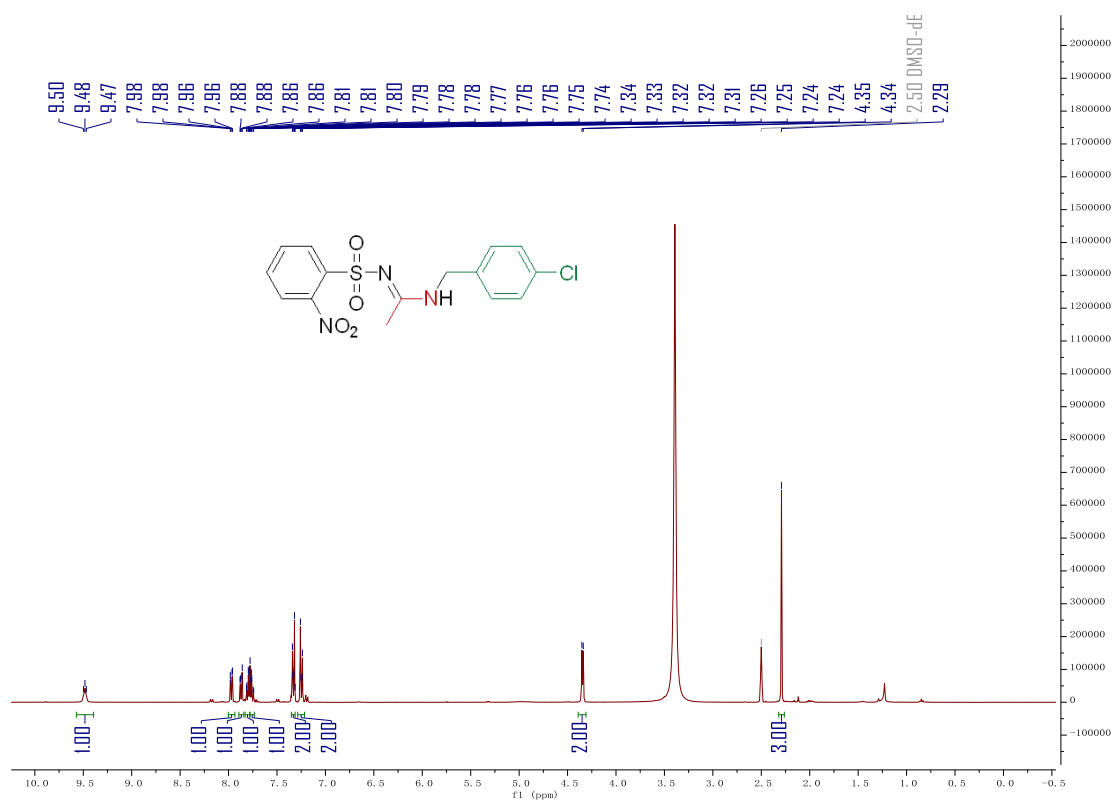

**<sup>13</sup>C NMR (100 MHz, DMSO-*d*<sub>6</sub>) of compound 4I**

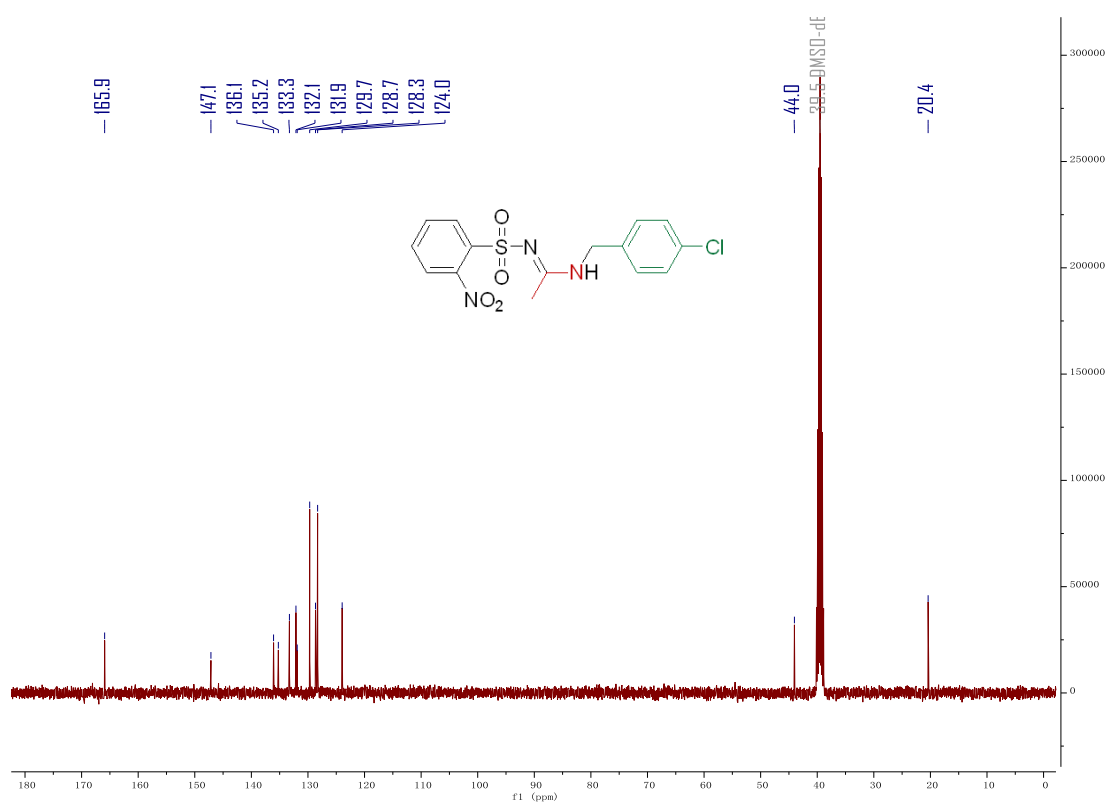

<sup>1</sup>H NMR (400 MHz, DMSO-d<sub>6</sub>) of compound **4m**

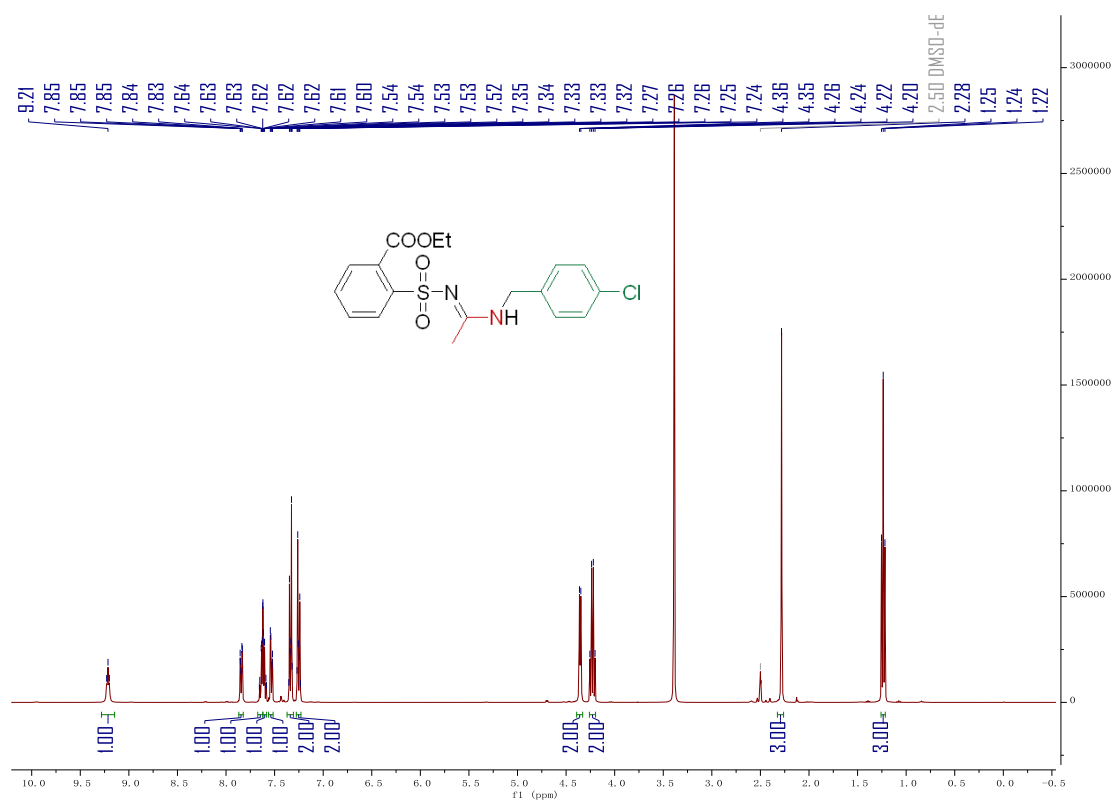

<sup>13</sup>C NMR (100 MHz, DMSO-d<sub>6</sub>) of compound **4m**

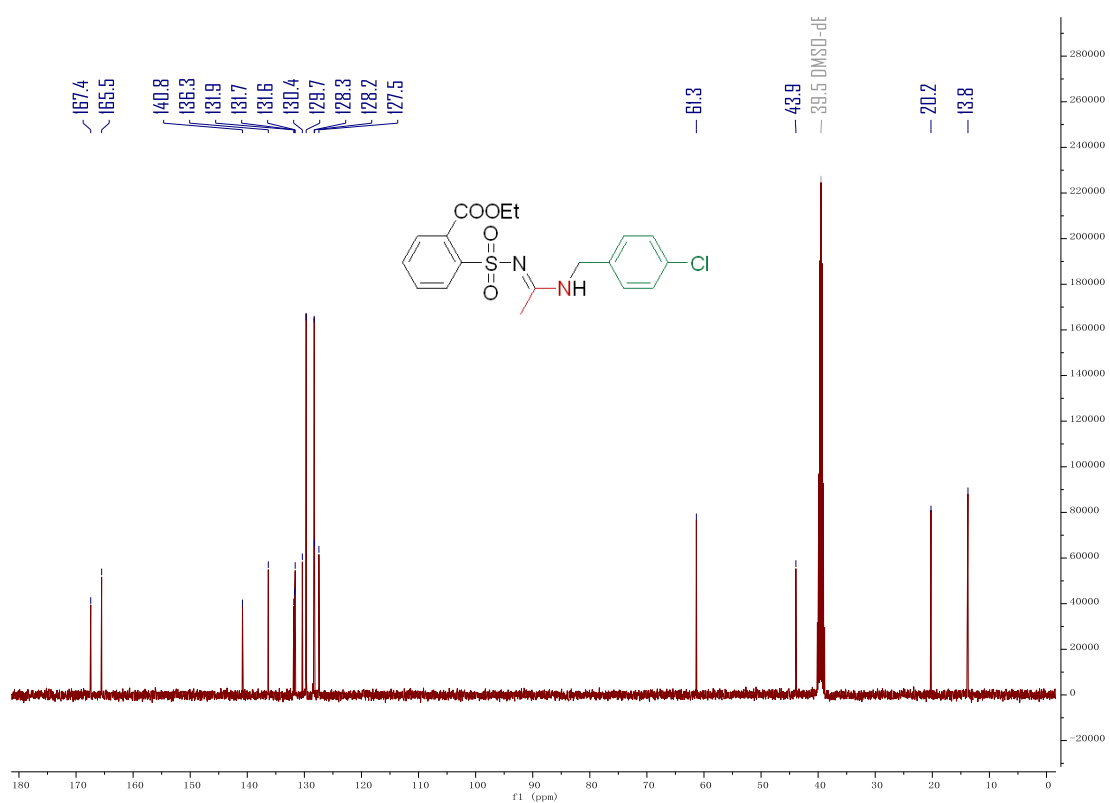



**<sup>1</sup>H NMR (400 MHz, DMSO-*d*<sub>6</sub>) of compound 4o**

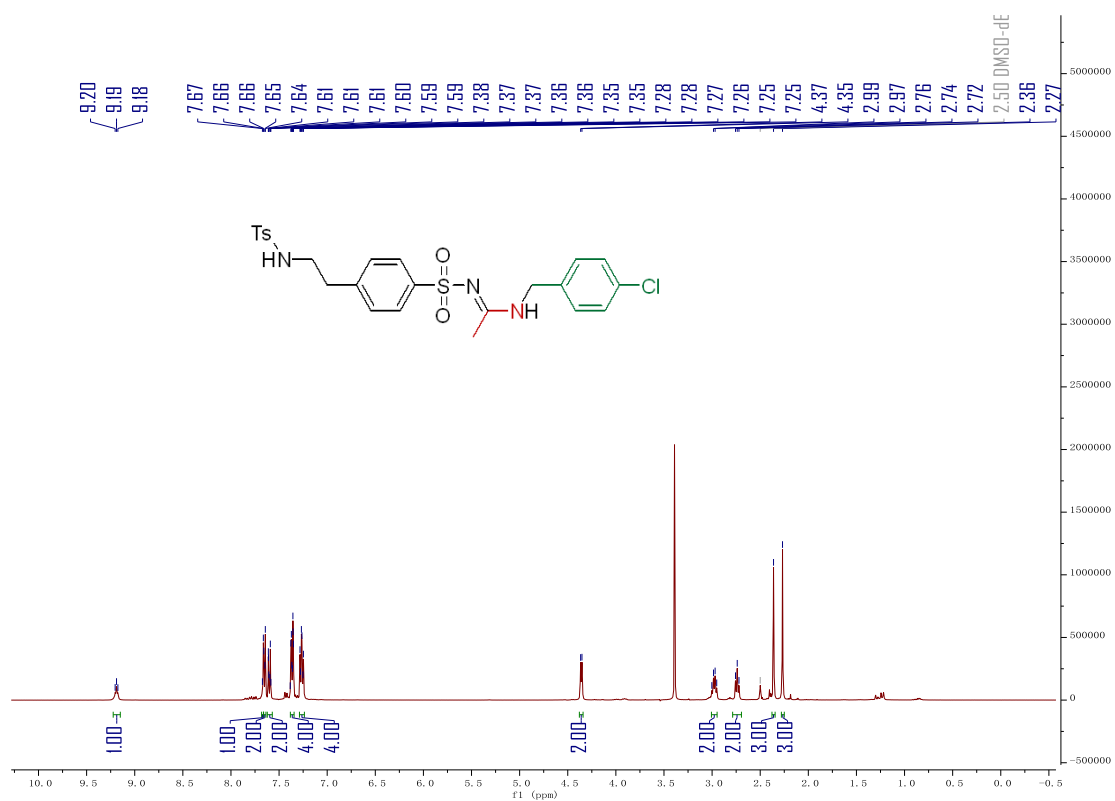

**<sup>13</sup>C NMR (100 MHz, DMSO-*d*<sub>6</sub>) of compound 4o**

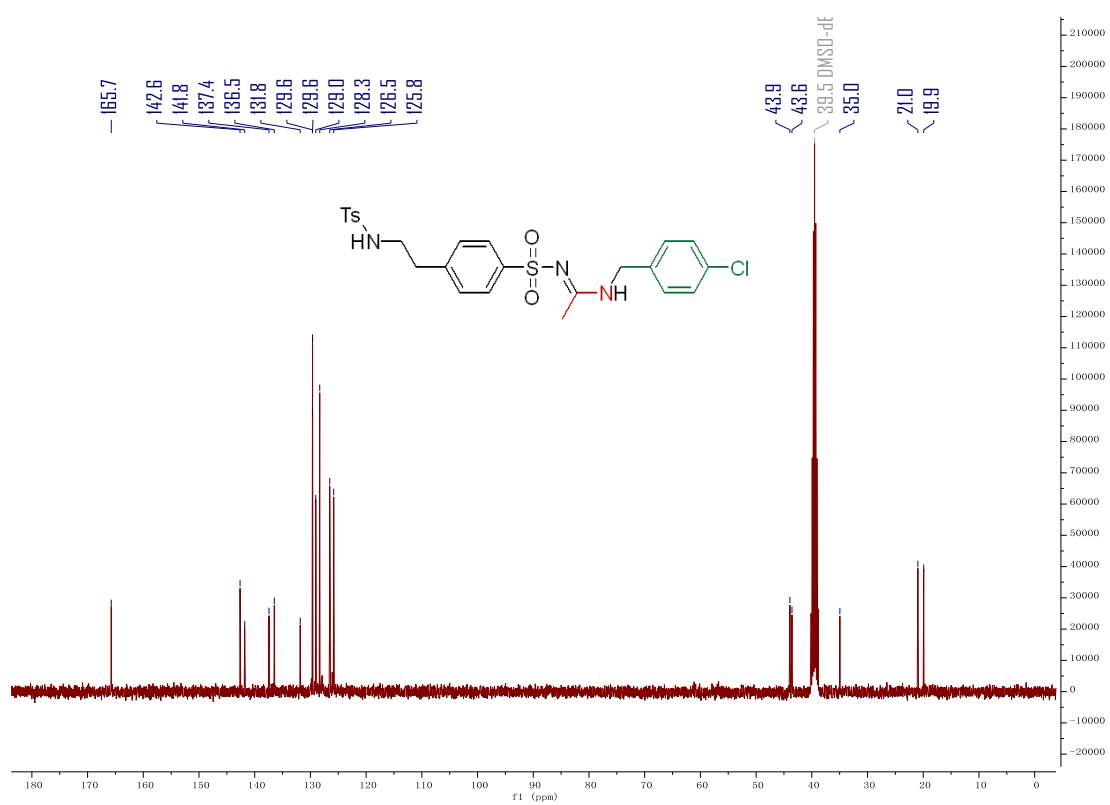



**<sup>1</sup>H NMR (400 MHz, DMSO-*d*<sub>6</sub>) of compound 4p**

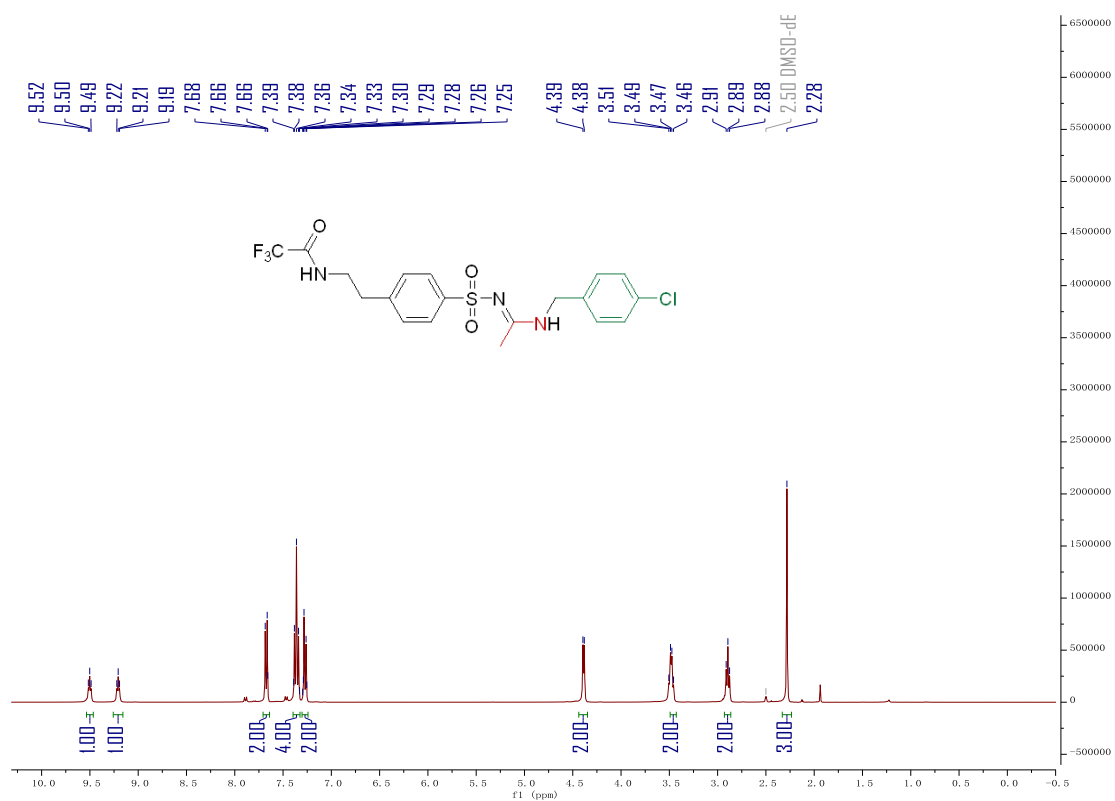

**<sup>13</sup>C NMR (100 MHz, DMSO-*d*<sub>6</sub>) of compound 4p**

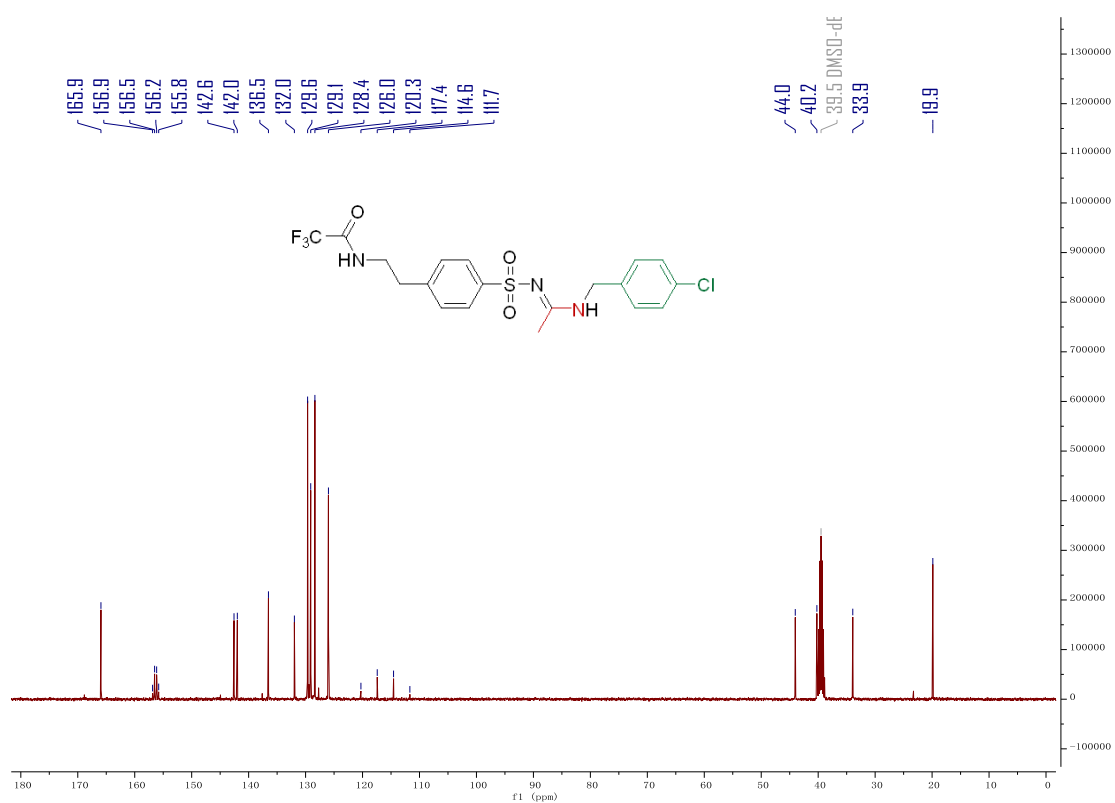

**<sup>19</sup>F NMR (376 MHz, DMSO-*d*<sub>6</sub>) of compound 4p**

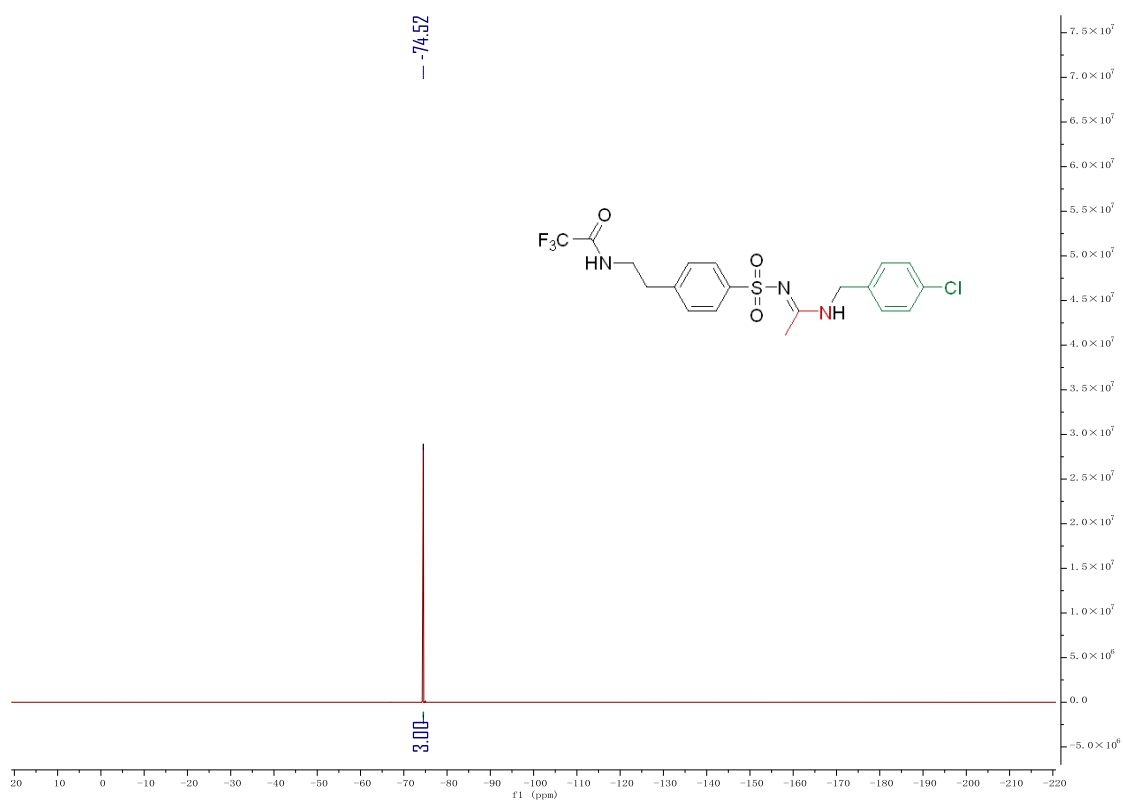



**<sup>1</sup>H NMR (400 MHz, DMSO-*d*<sub>6</sub>) of compound 4r**

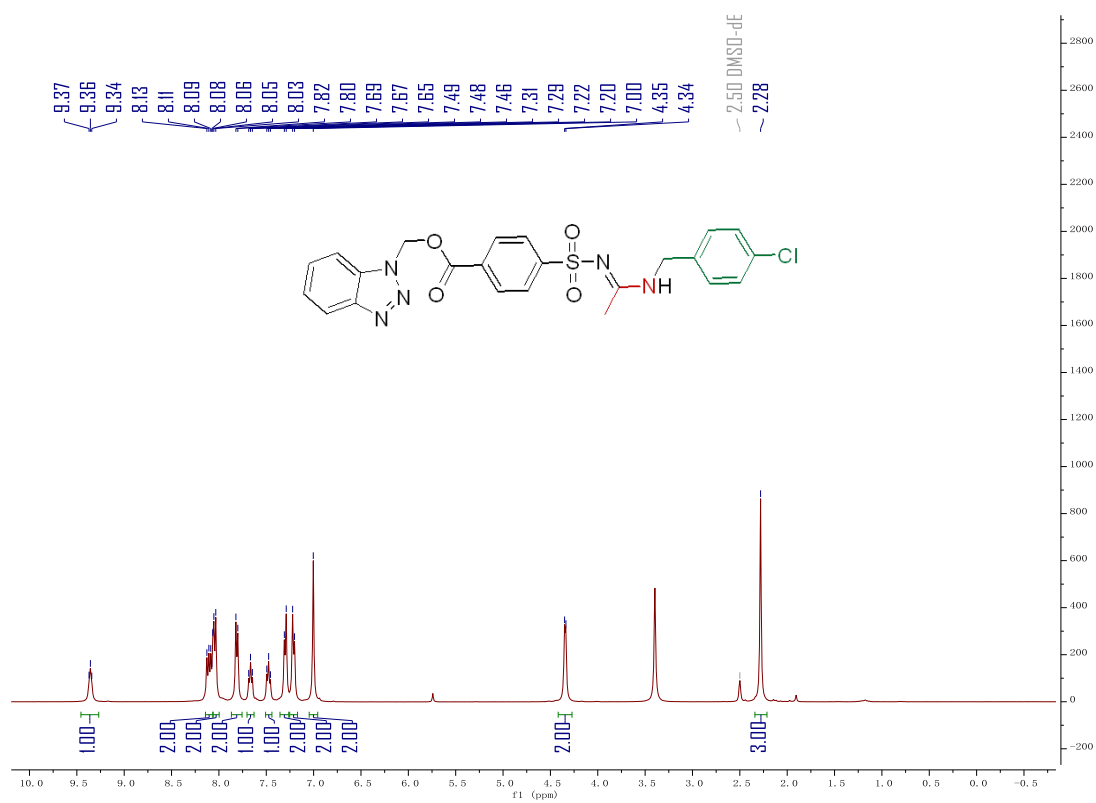

**<sup>13</sup>C NMR (100 MHz, DMSO-*d*<sub>6</sub>) of compound 4r**

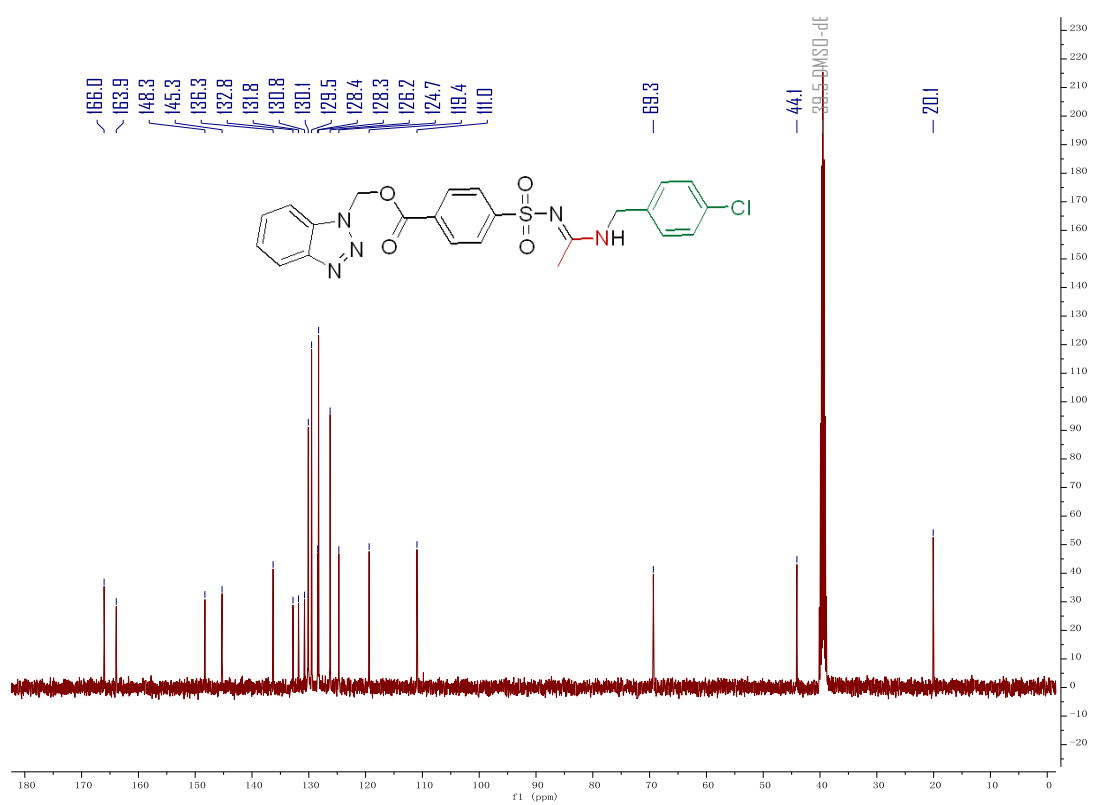

**<sup>1</sup>H NMR (400 MHz, DMSO-*d*<sub>6</sub>) of compound 4s**

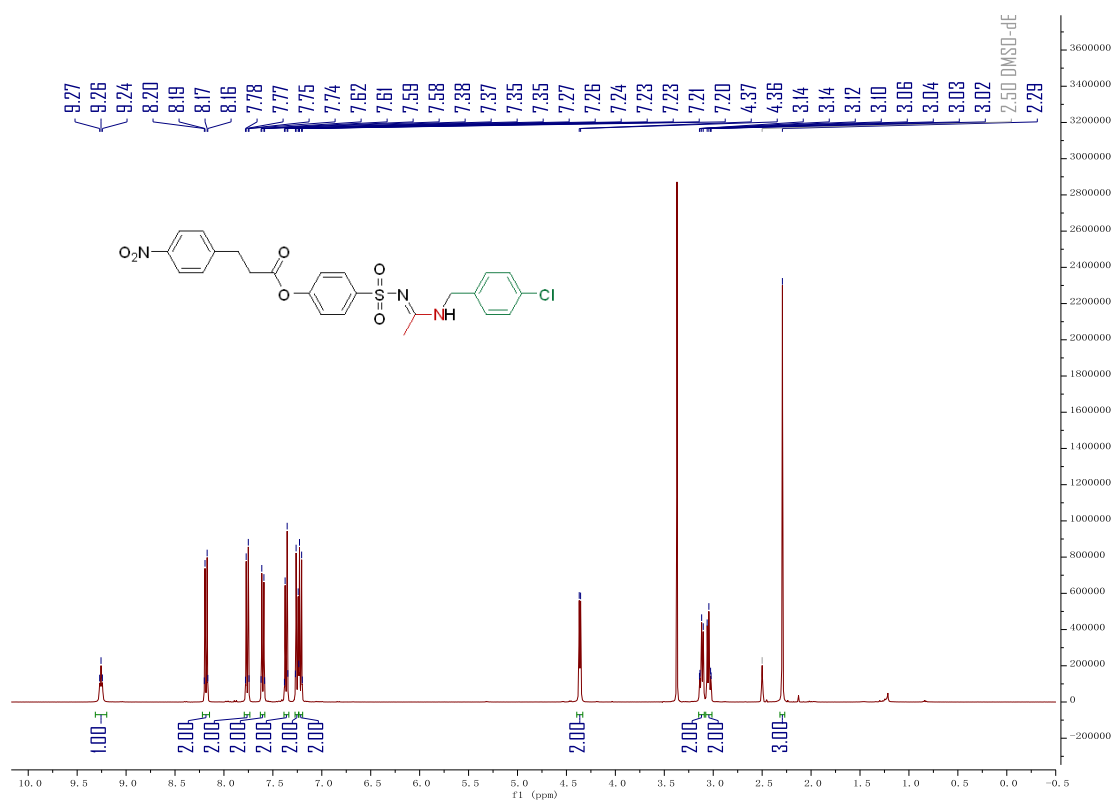

**<sup>13</sup>C NMR (100 MHz, DMSO-*d*<sub>6</sub>) of compound 4s**

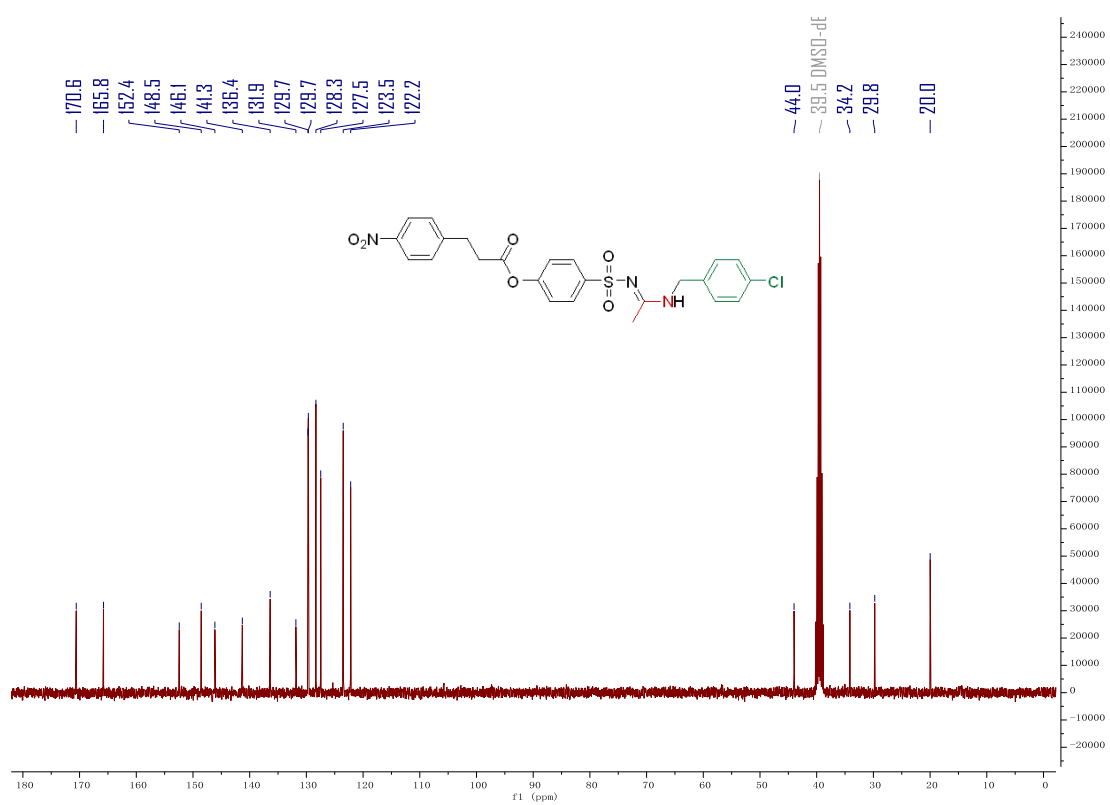

**<sup>1</sup>H NMR (400 MHz, DMSO-*d*<sub>6</sub>) of compound 4t**

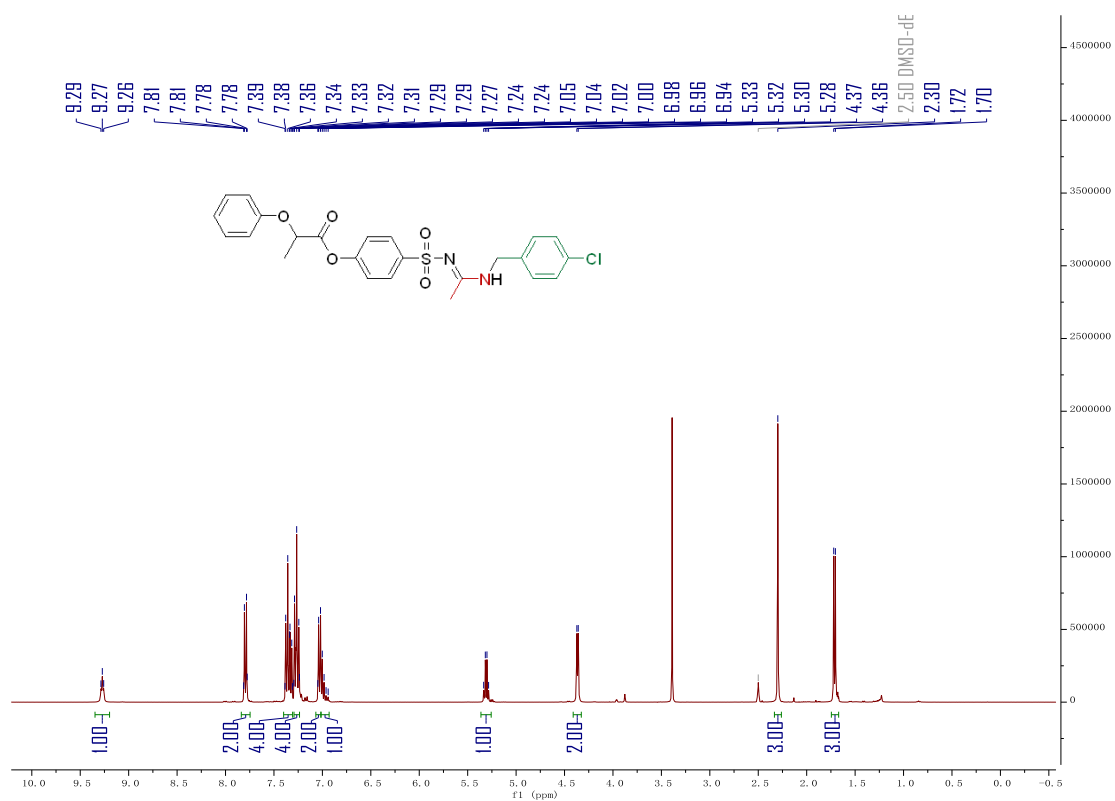

**<sup>13</sup>C NMR (100 MHz, DMSO-*d*<sub>6</sub>) of compound 4t**

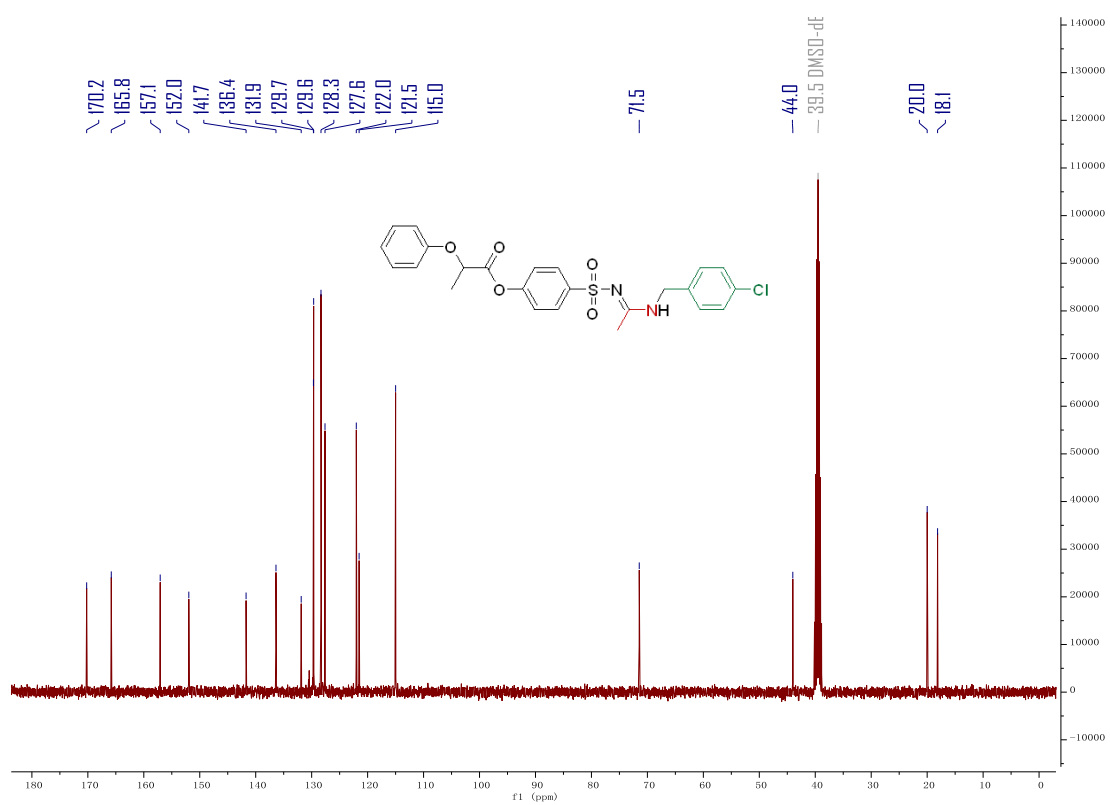

**<sup>1</sup>H NMR (400 MHz, DMSO-*d*<sub>6</sub>) of compound 4u**

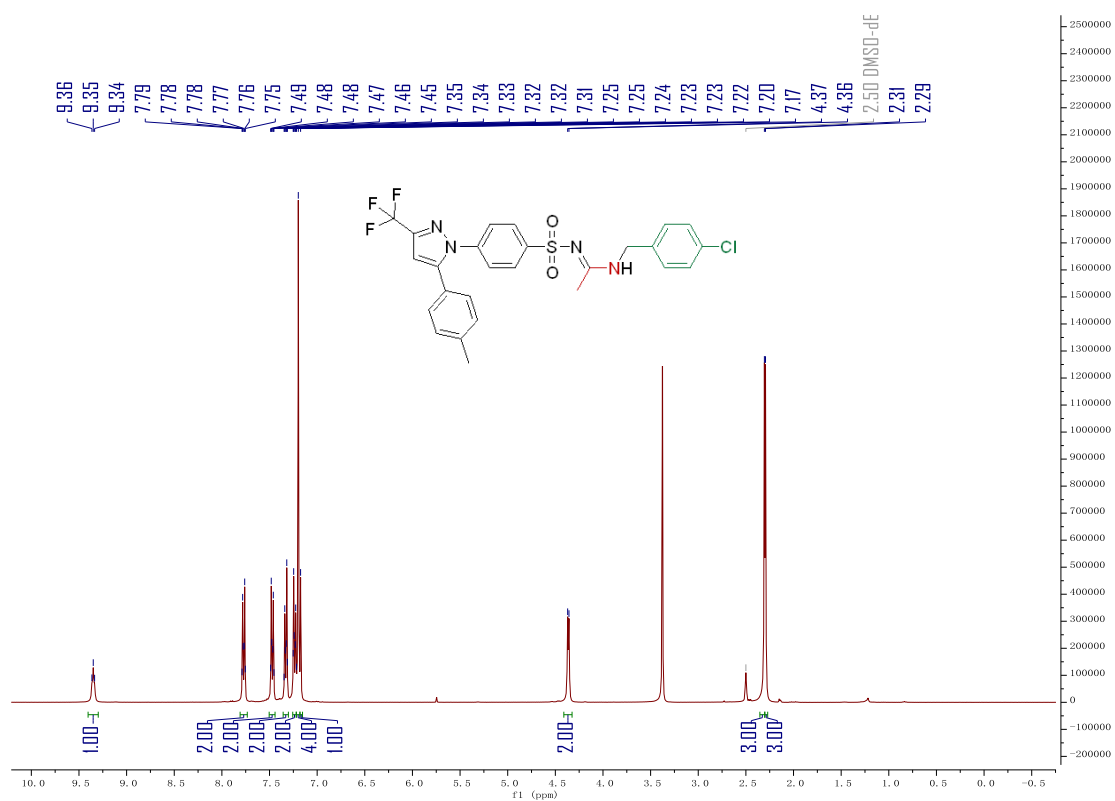

**<sup>13</sup>C NMR (100 MHz, DMSO-*d*<sub>6</sub>) of compound 4u**

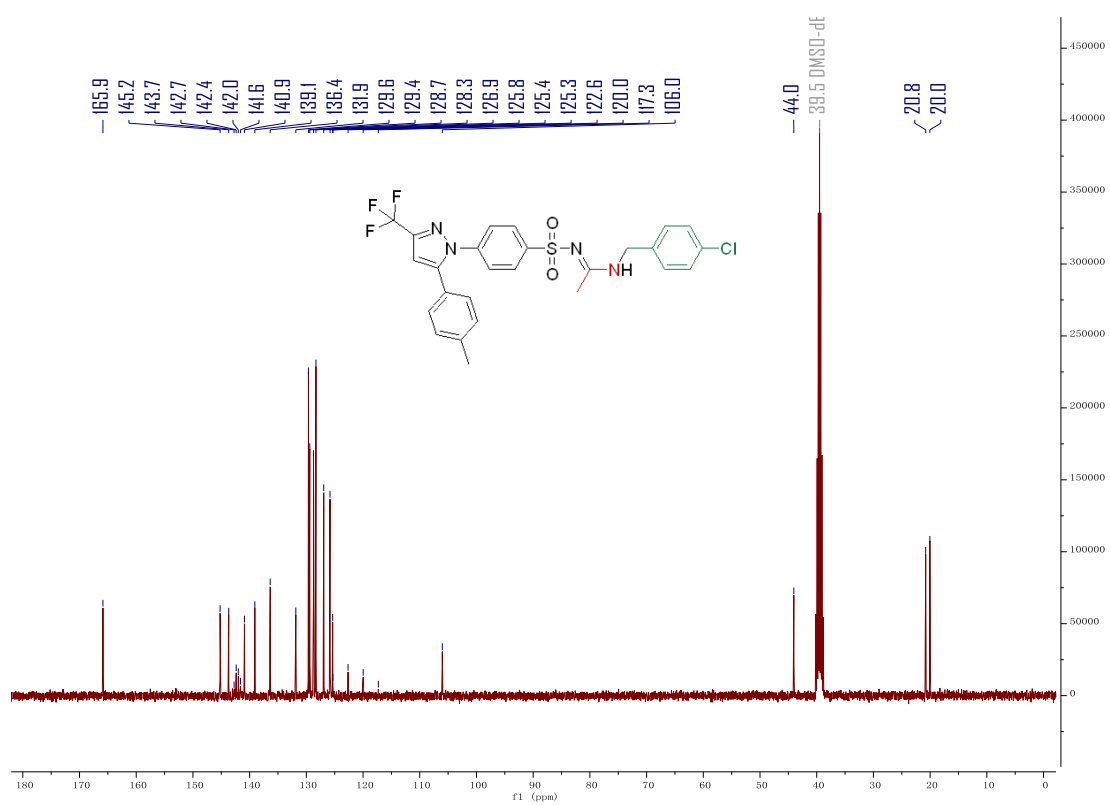

<sup>19</sup>F NMR (376 MHz, DMSO-*d*<sub>6</sub>) of compound **4u**

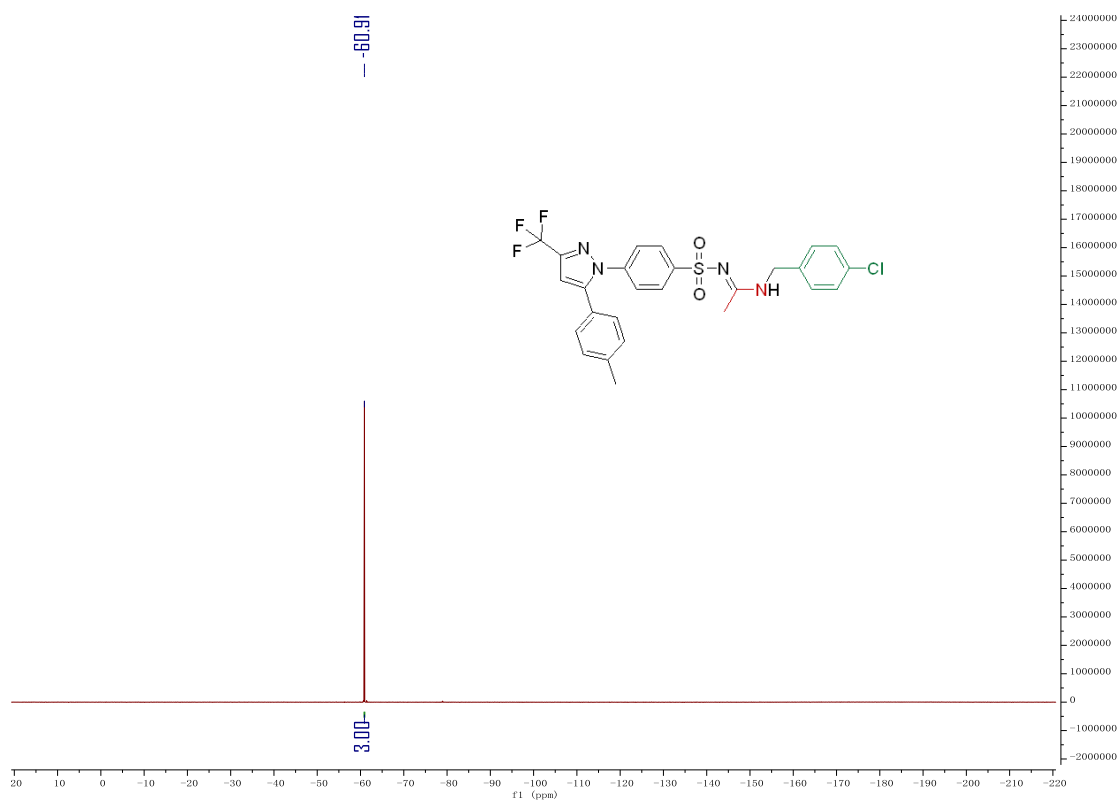



**<sup>1</sup>H NMR (400 MHz, DMSO-*d*<sub>6</sub>) of compound 4v**

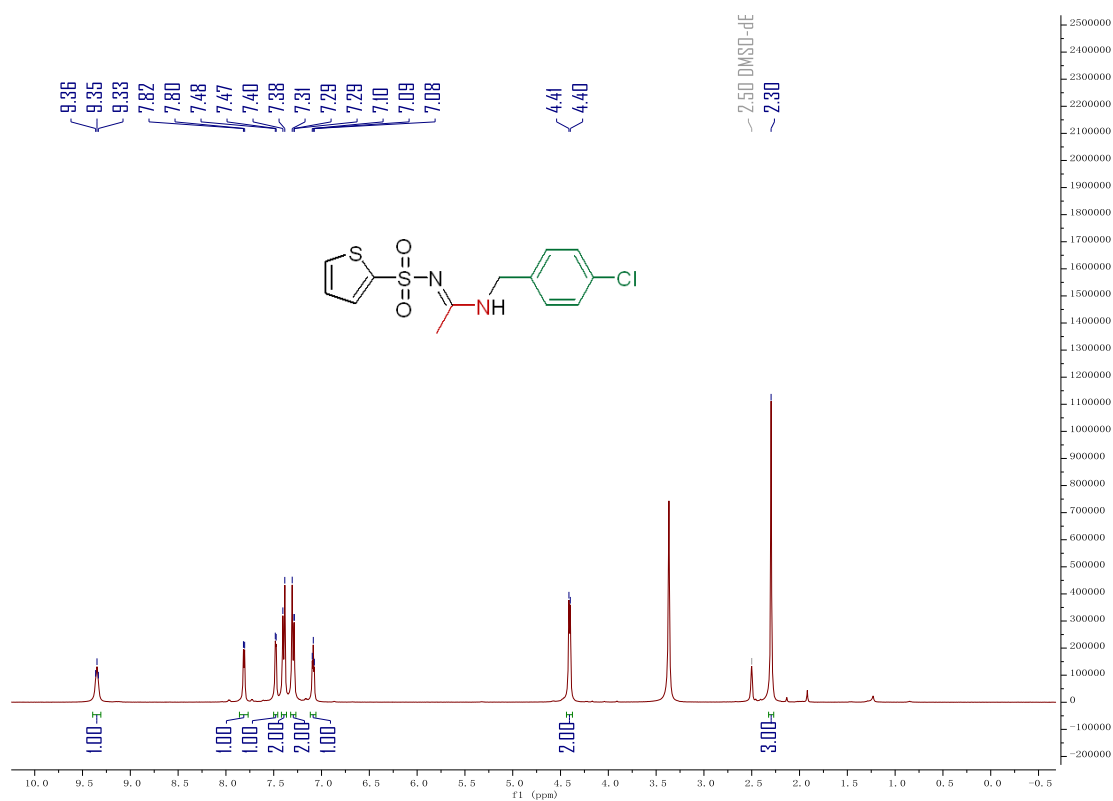

**<sup>13</sup>C NMR (100 MHz, DMSO-*d*<sub>6</sub>) of compound 4v**

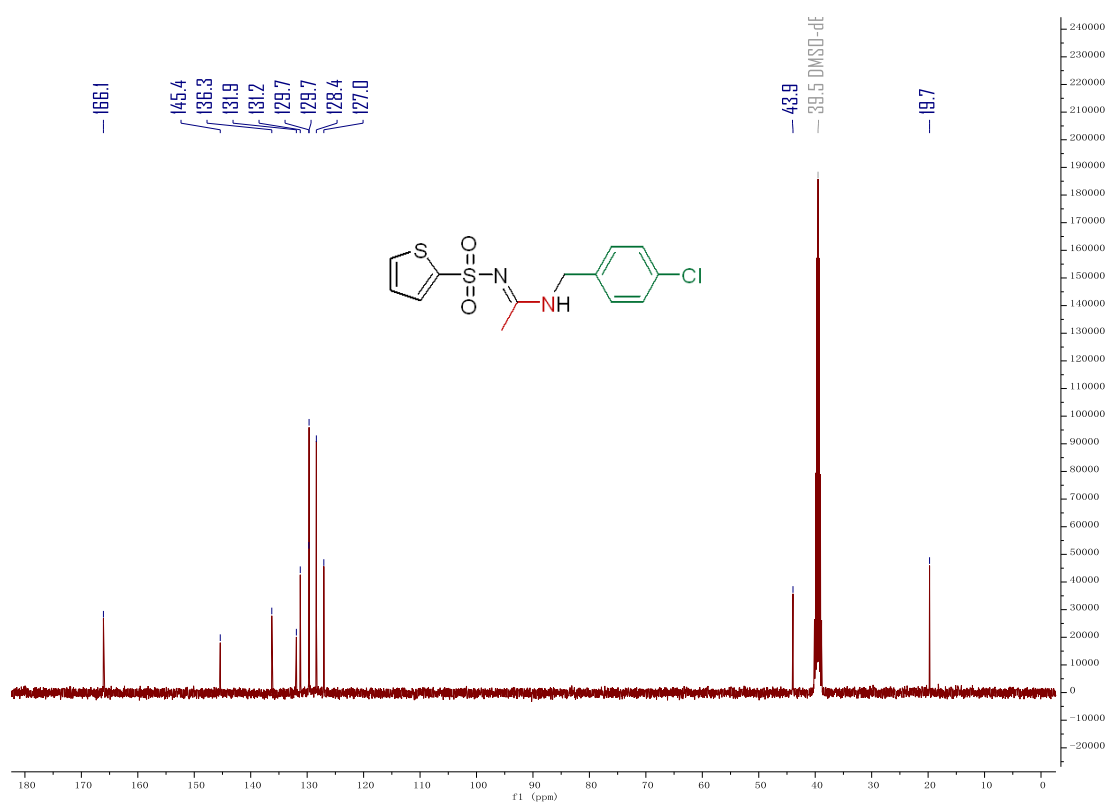

**<sup>1</sup>H NMR (400 MHz, DMSO-*d*<sub>6</sub>) of compound 4w**

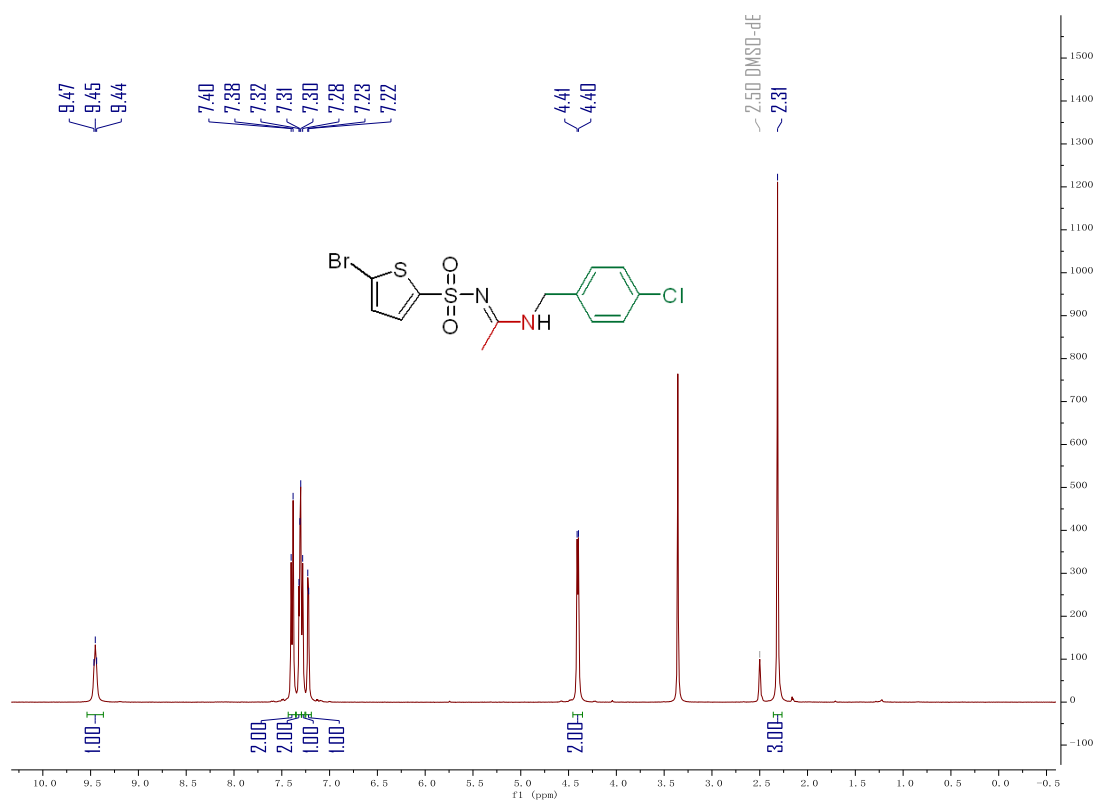

**<sup>13</sup>C NMR (100 MHz, DMSO-*d*<sub>6</sub>) of compound 4w**

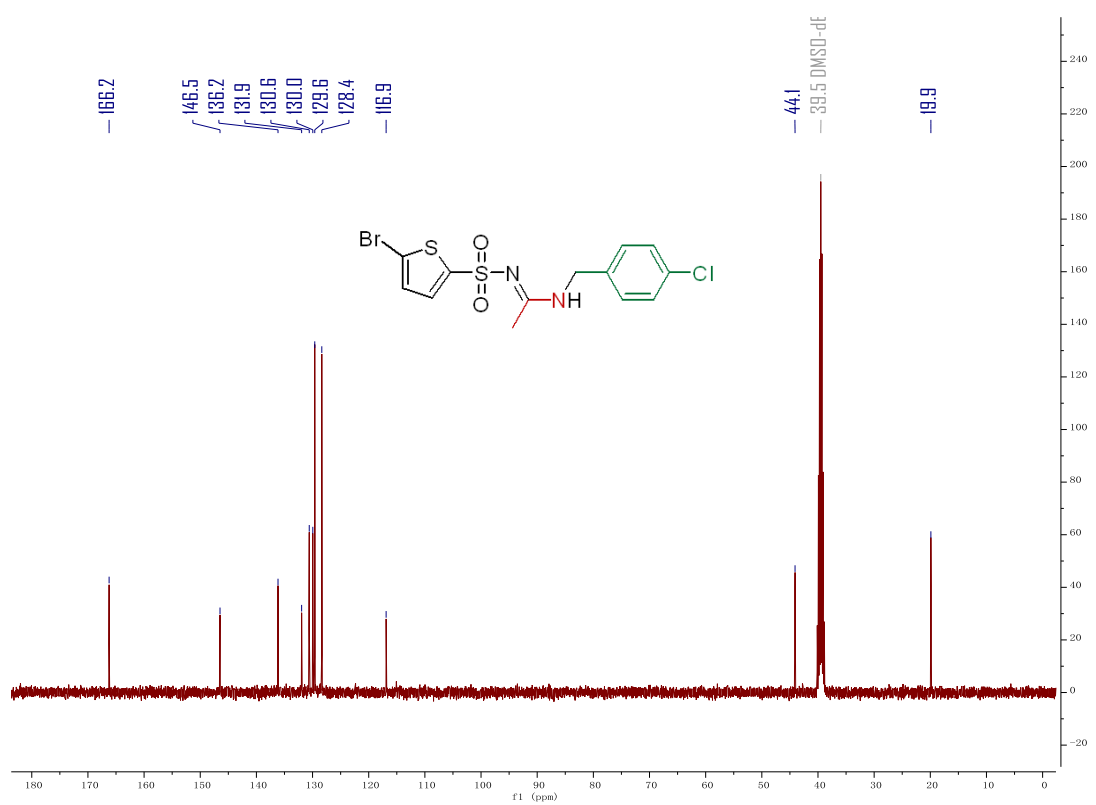

<sup>1</sup>H NMR (400 MHz, DMSO-d<sub>6</sub>) of compound 4x

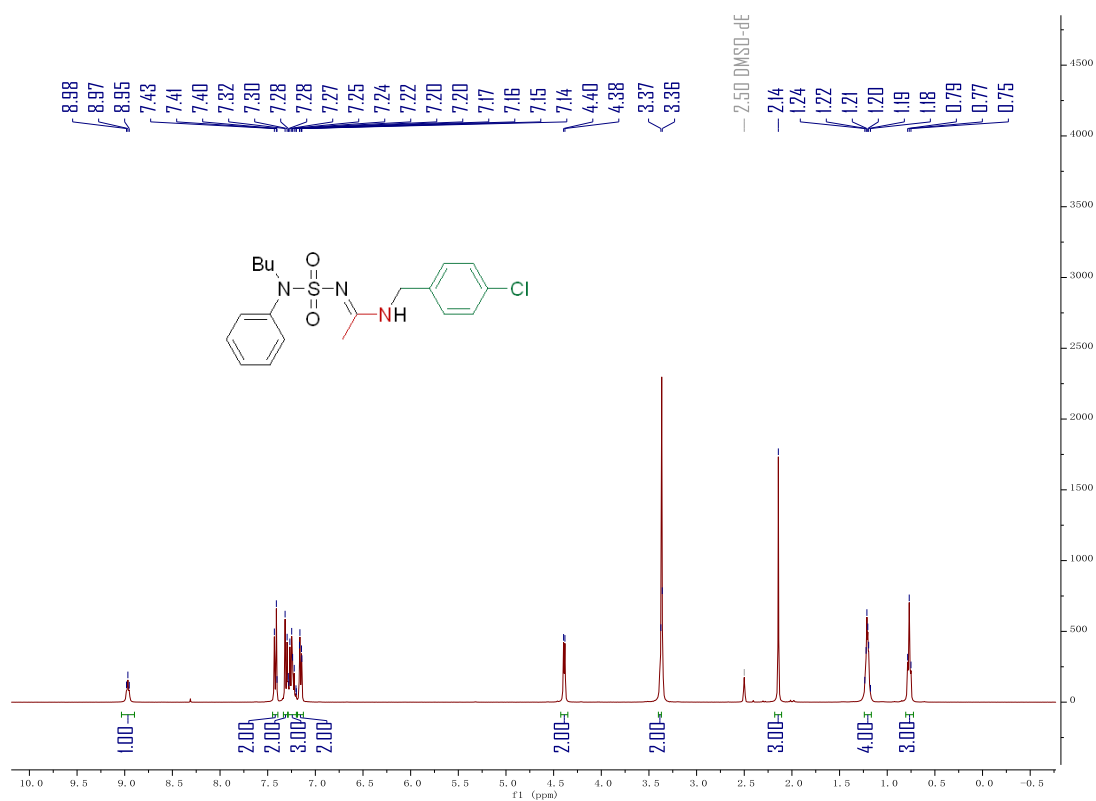

<sup>13</sup>C NMR (100 MHz, DMSO-d<sub>6</sub>) of compound 4x

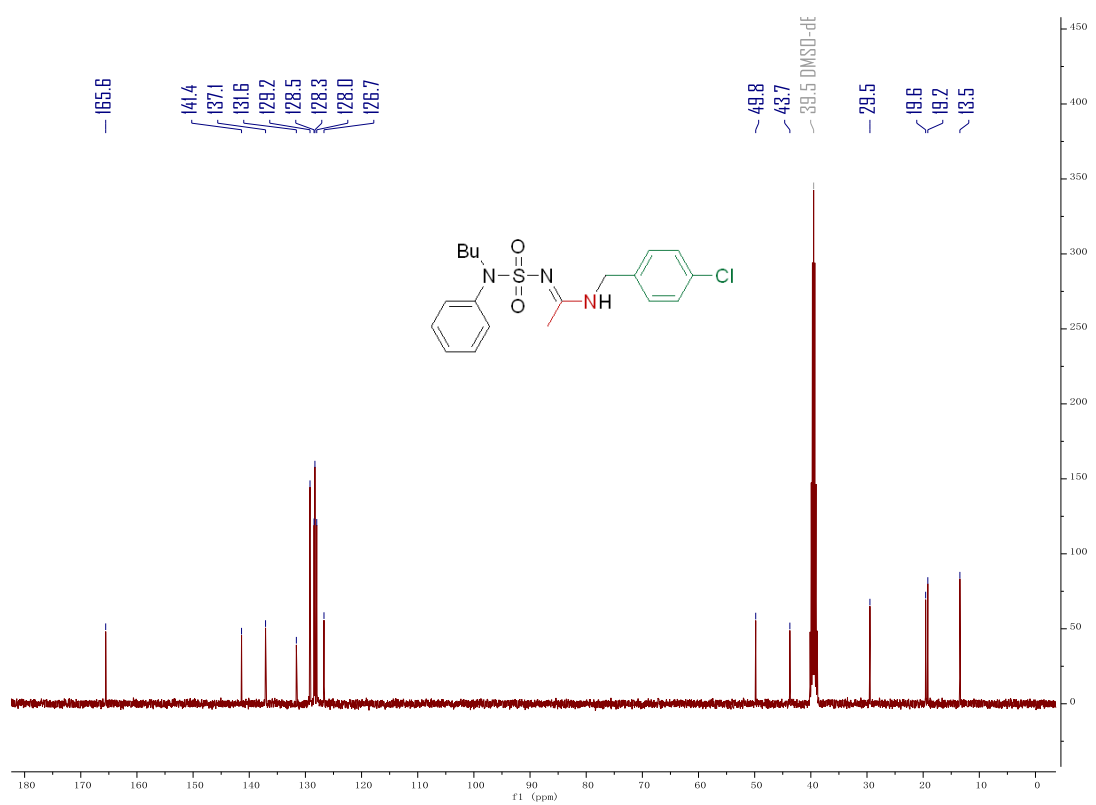

<sup>1</sup>H NMR (400 MHz, DMSO-d<sub>6</sub>) of compound 4y

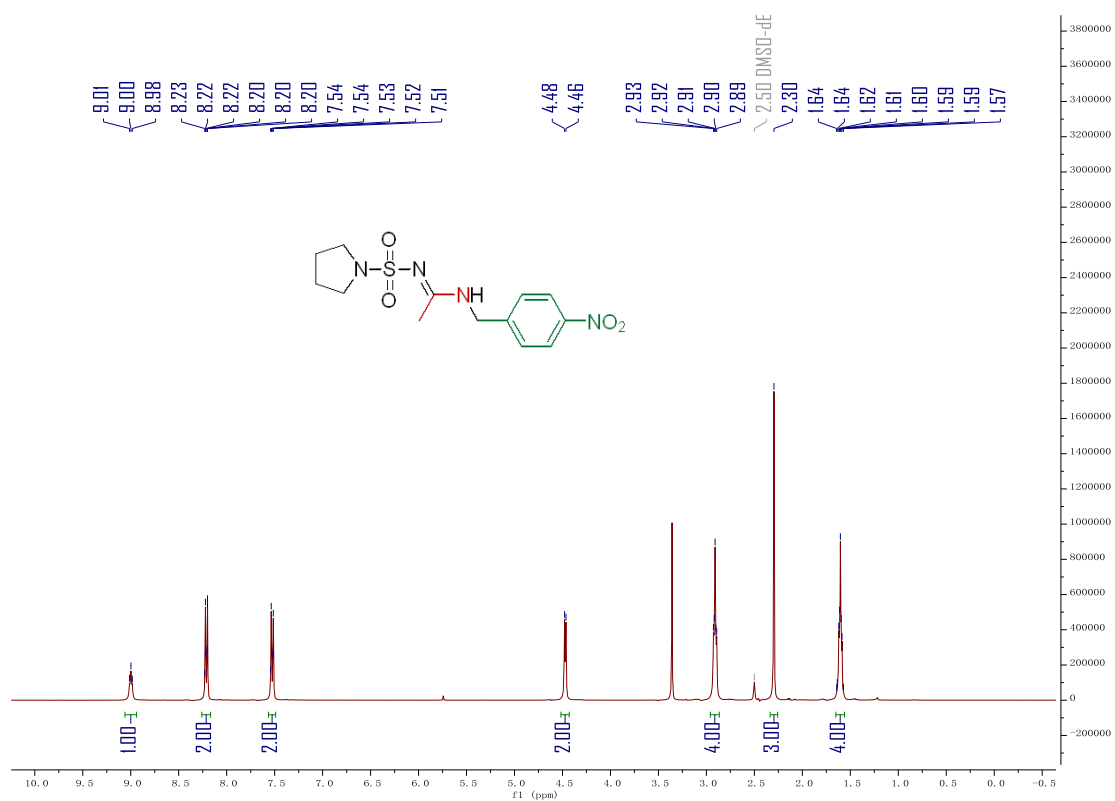

<sup>13</sup>C NMR (100 MHz, DMSO-d<sub>6</sub>) of compound 4y

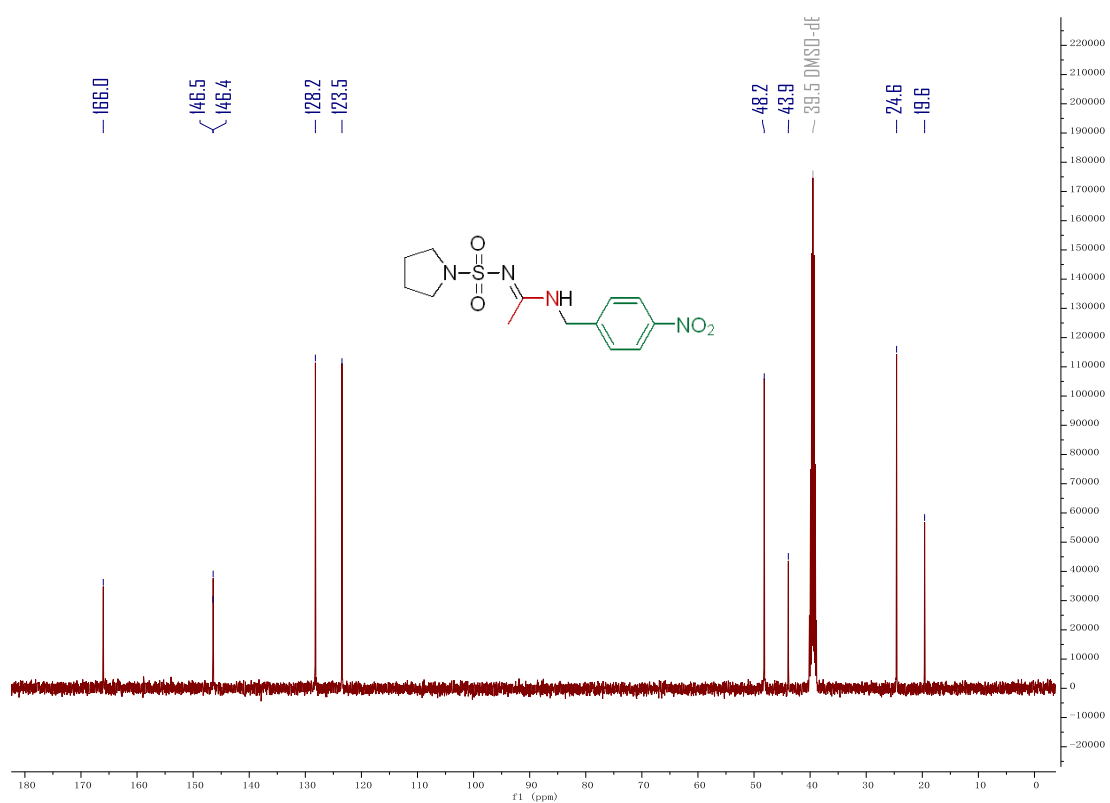

**<sup>1</sup>H NMR (400 MHz, DMSO-*d*<sub>6</sub>) of compound 4z**

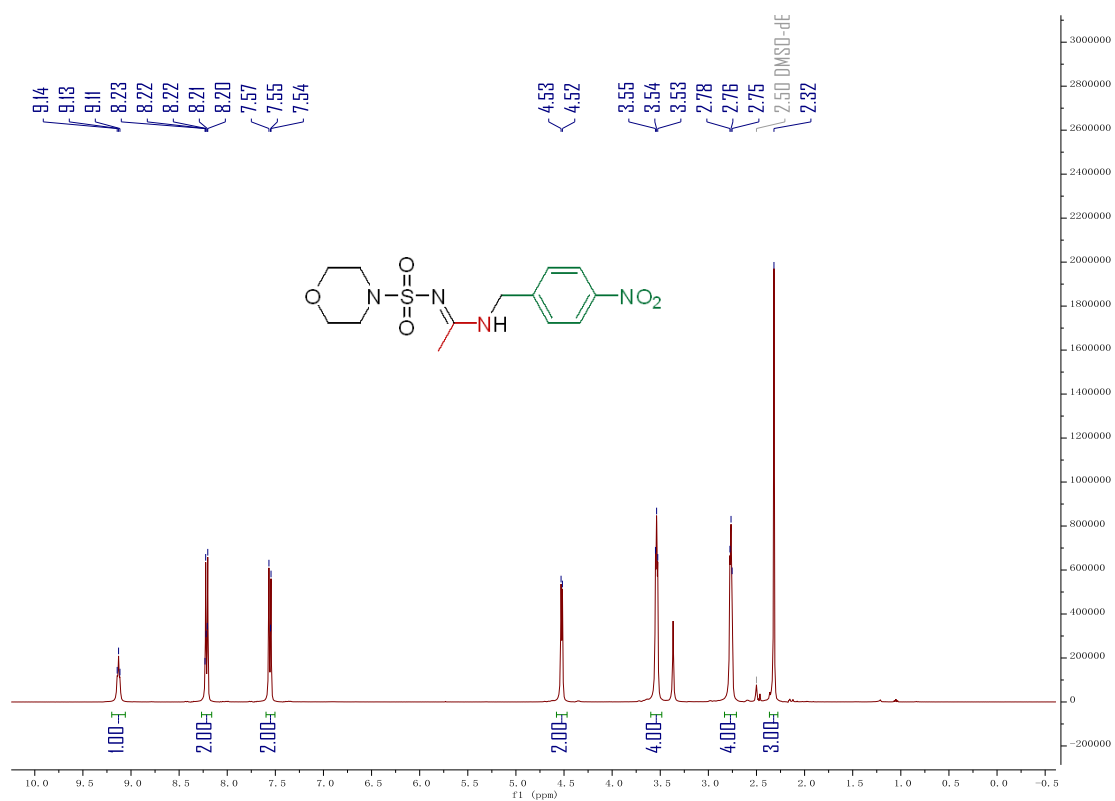

**<sup>13</sup>C NMR (100 MHz, DMSO-*d*<sub>6</sub>) of compound 4z**

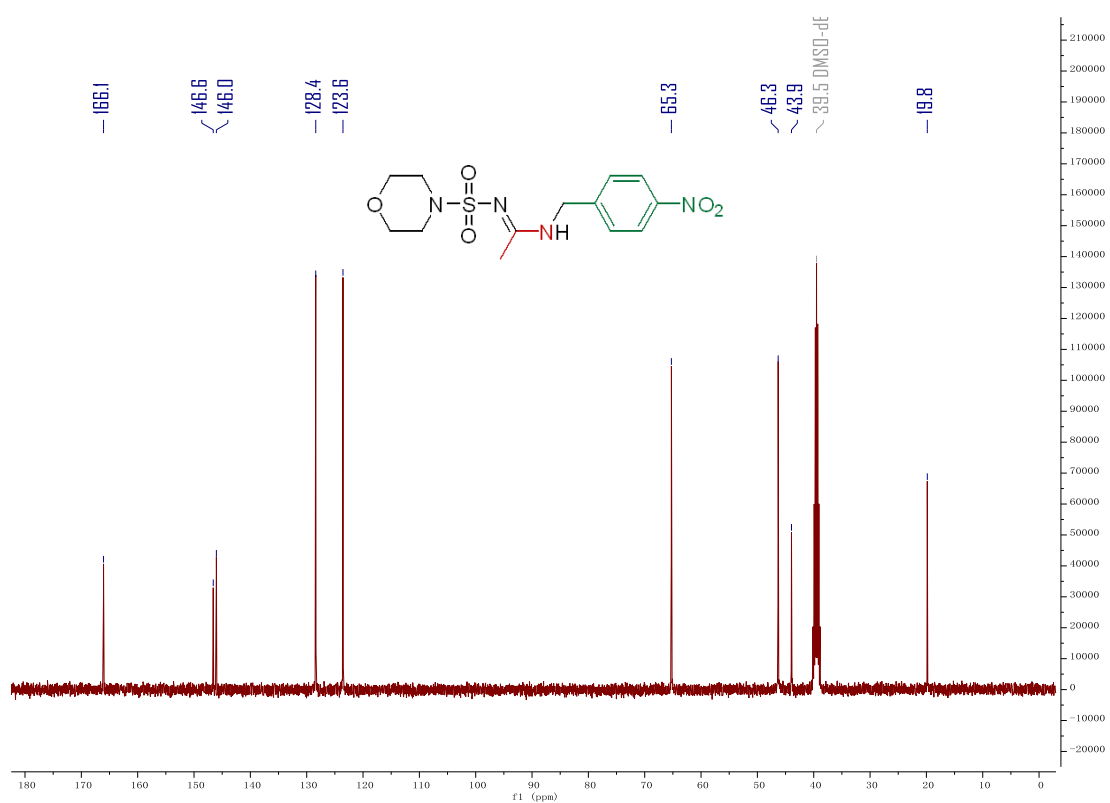

**<sup>1</sup>H NMR (400 MHz, DMSO-*d*<sub>6</sub>) of compound 4aa**

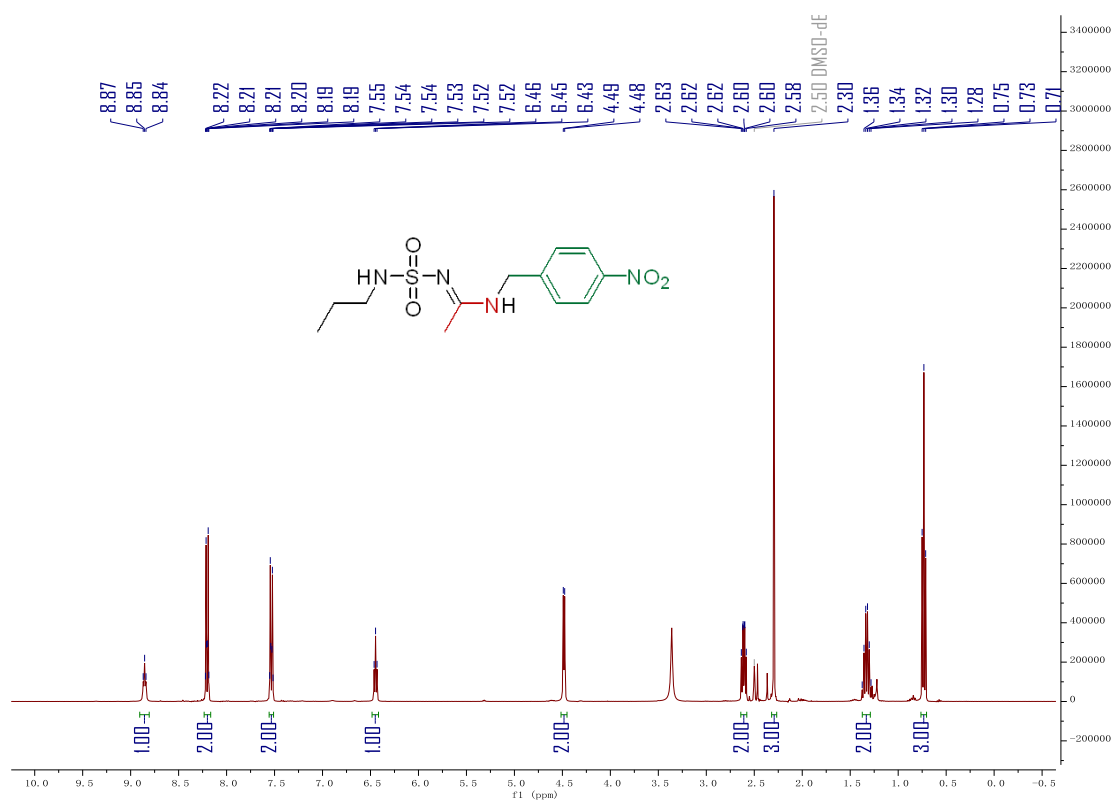

**<sup>13</sup>C NMR (100 MHz, DMSO-*d*<sub>6</sub>) of compound 4aa**

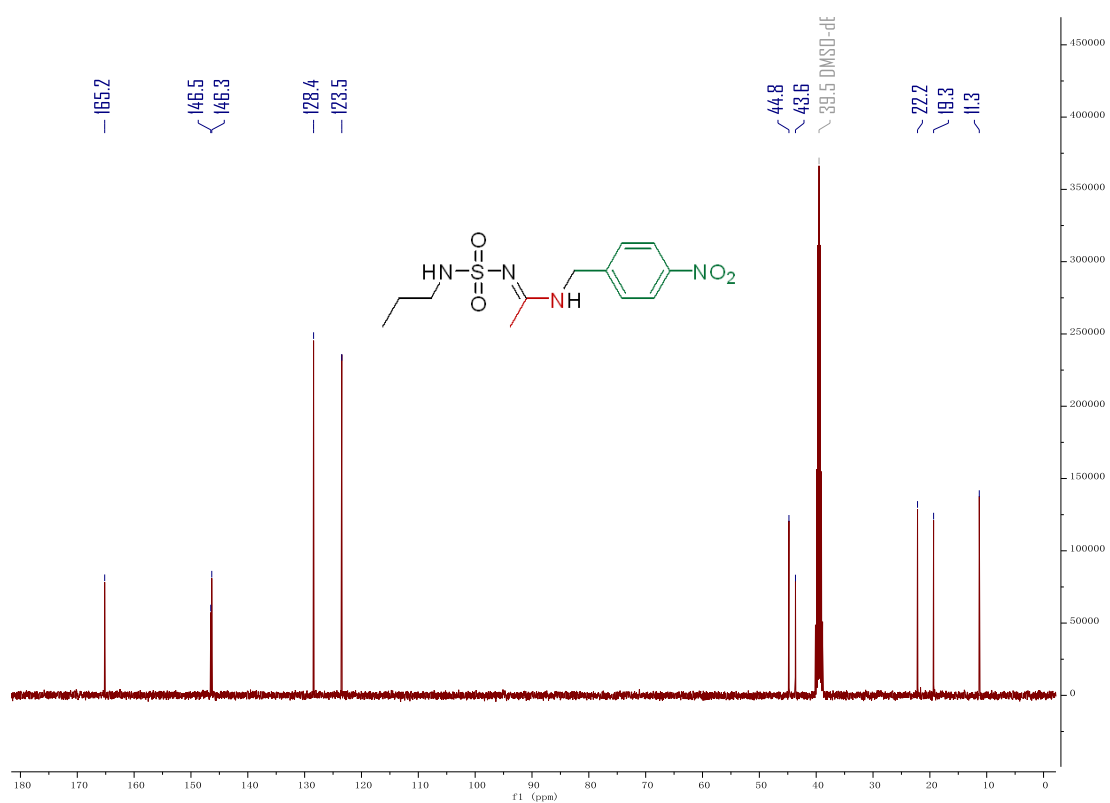

**<sup>1</sup>H NMR (400 MHz, DMSO-*d*<sub>6</sub>) of compound 4ab**

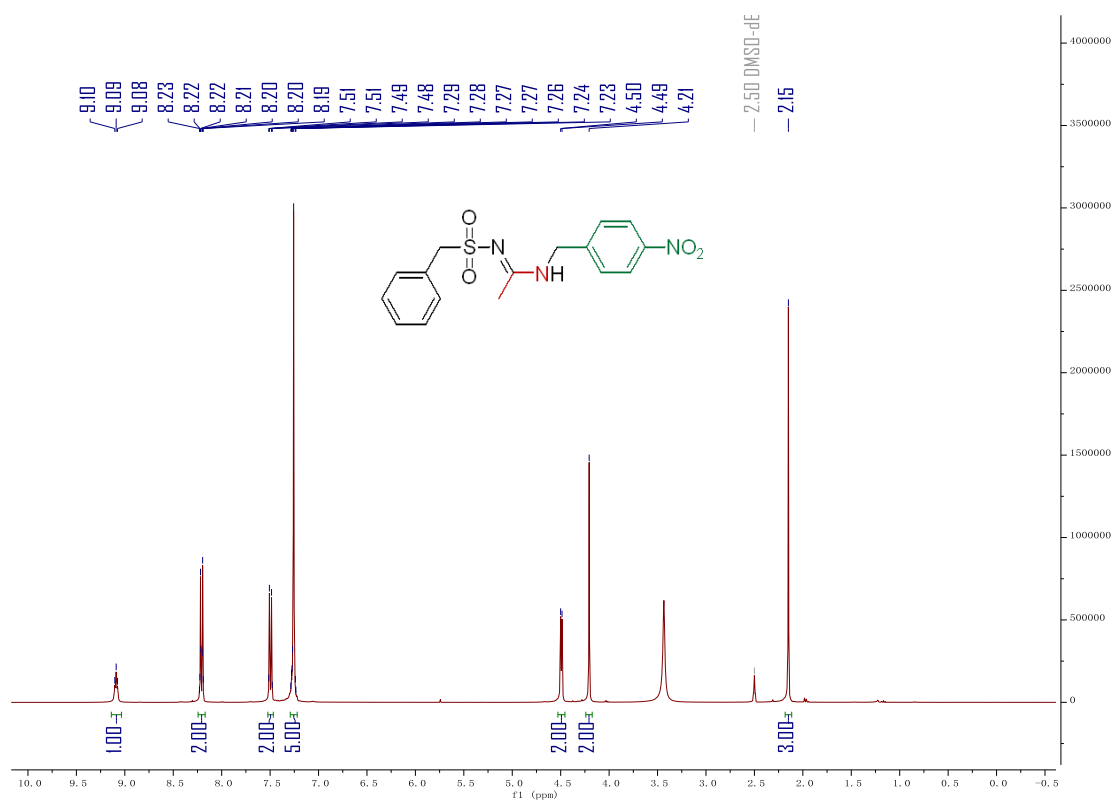

**<sup>13</sup>C NMR (100 MHz, DMSO-*d*<sub>6</sub>) of compound 4ab**

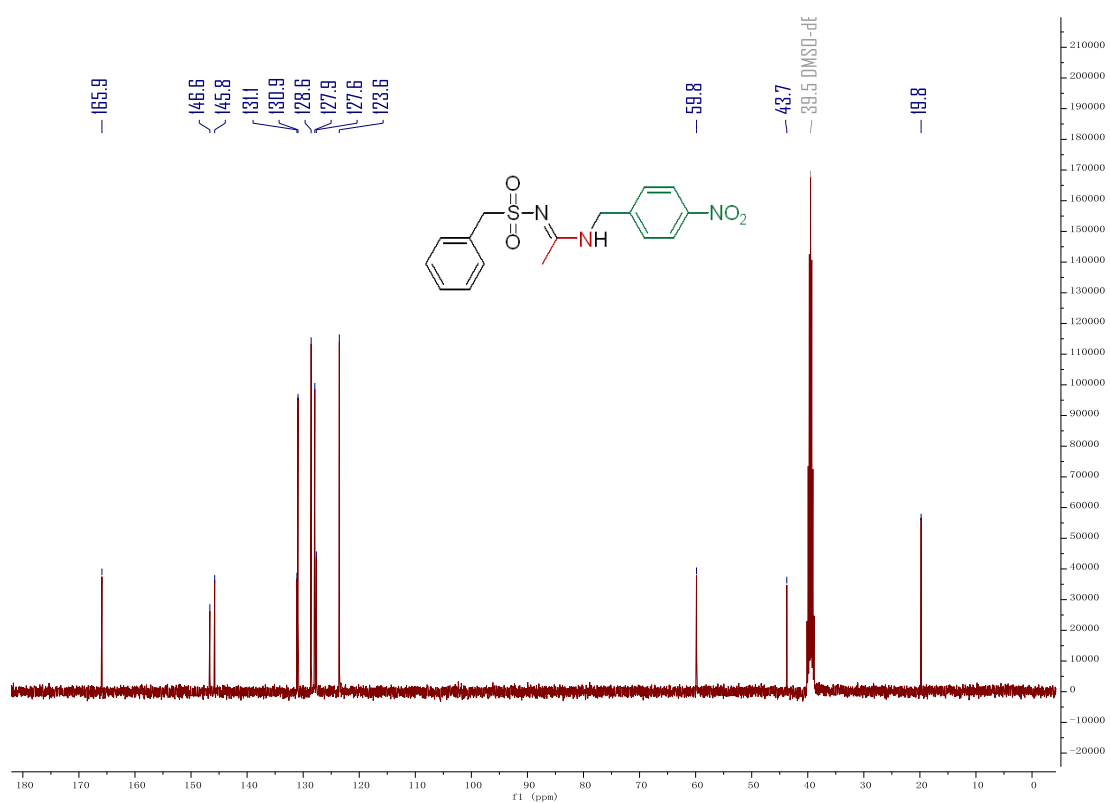

**<sup>1</sup>H NMR (400 MHz, DMSO-*d*<sub>6</sub>) of compound 4ac**

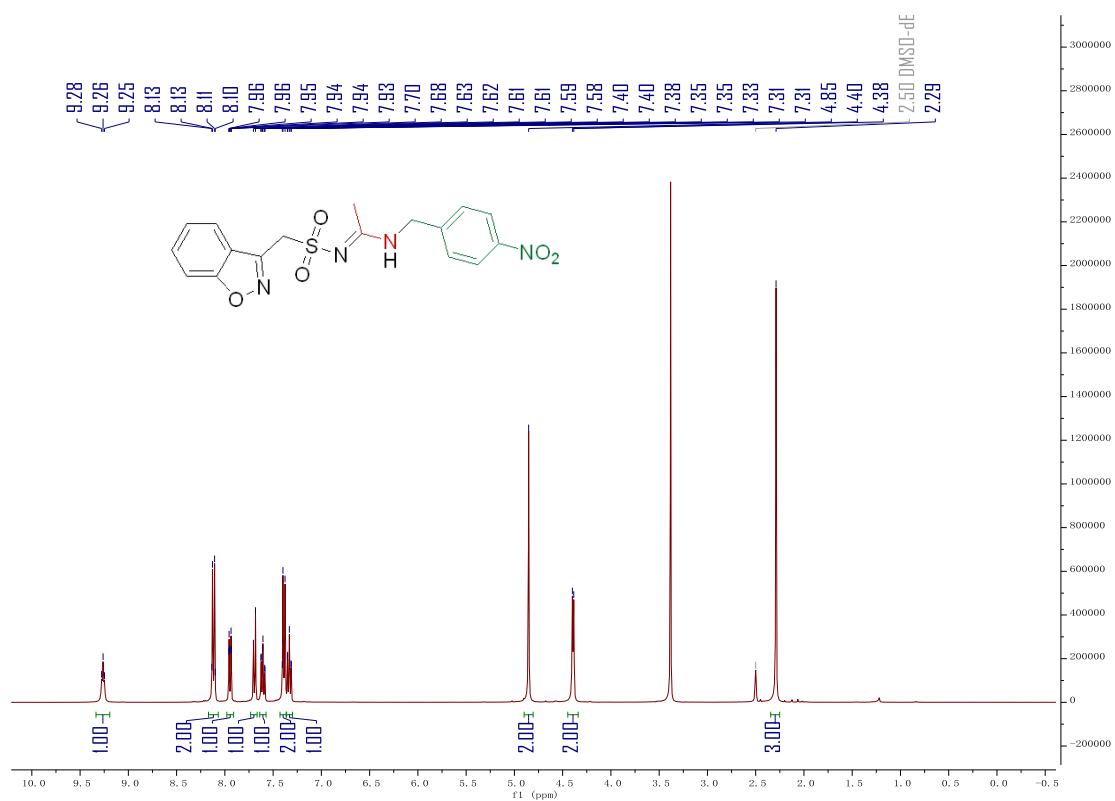

**<sup>13</sup>C NMR (100 MHz, DMSO-*d*<sub>6</sub>) of compound 4ac**

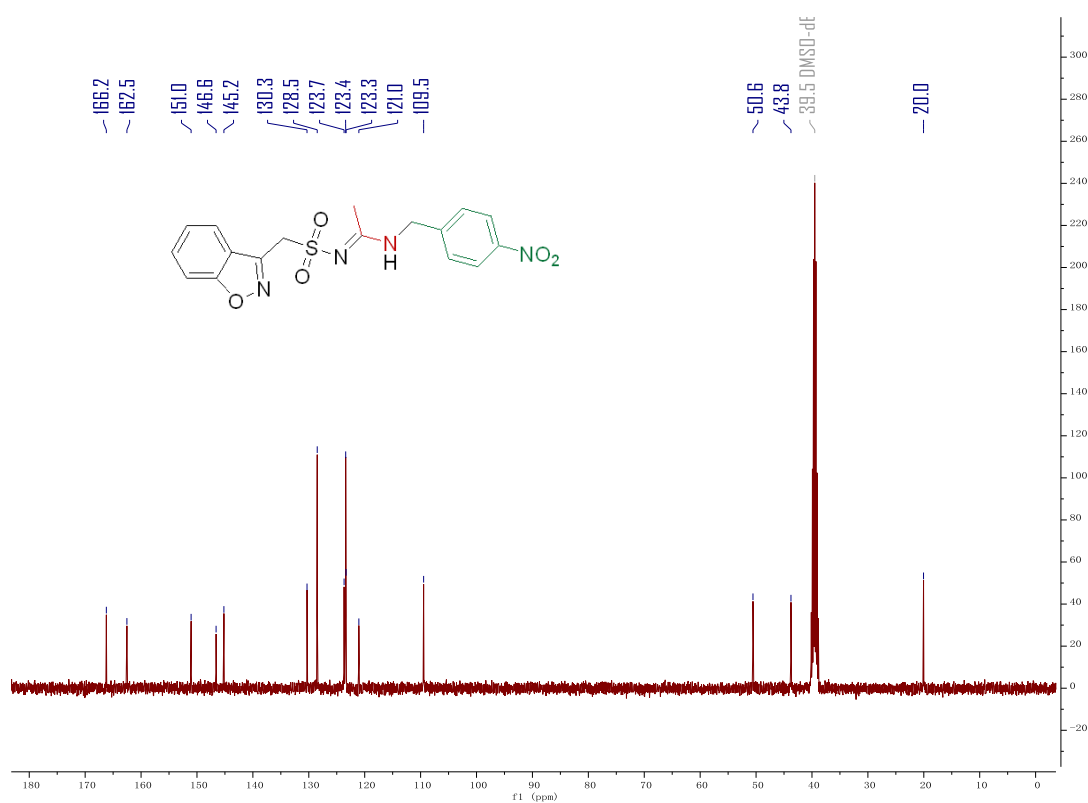



**<sup>1</sup>H NMR (400 MHz, DMSO-*d*<sub>6</sub>) of compound 4ad**

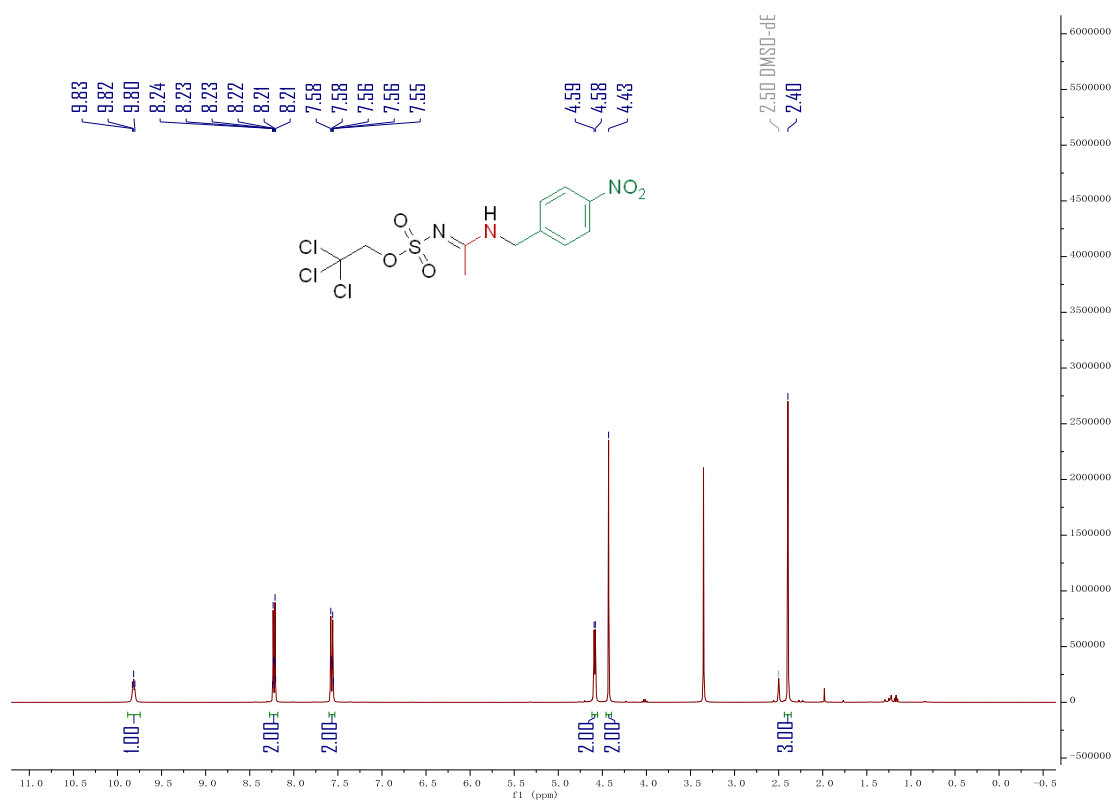

**<sup>13</sup>C NMR (100 MHz, DMSO-*d*<sub>6</sub>) of compound 4ad**

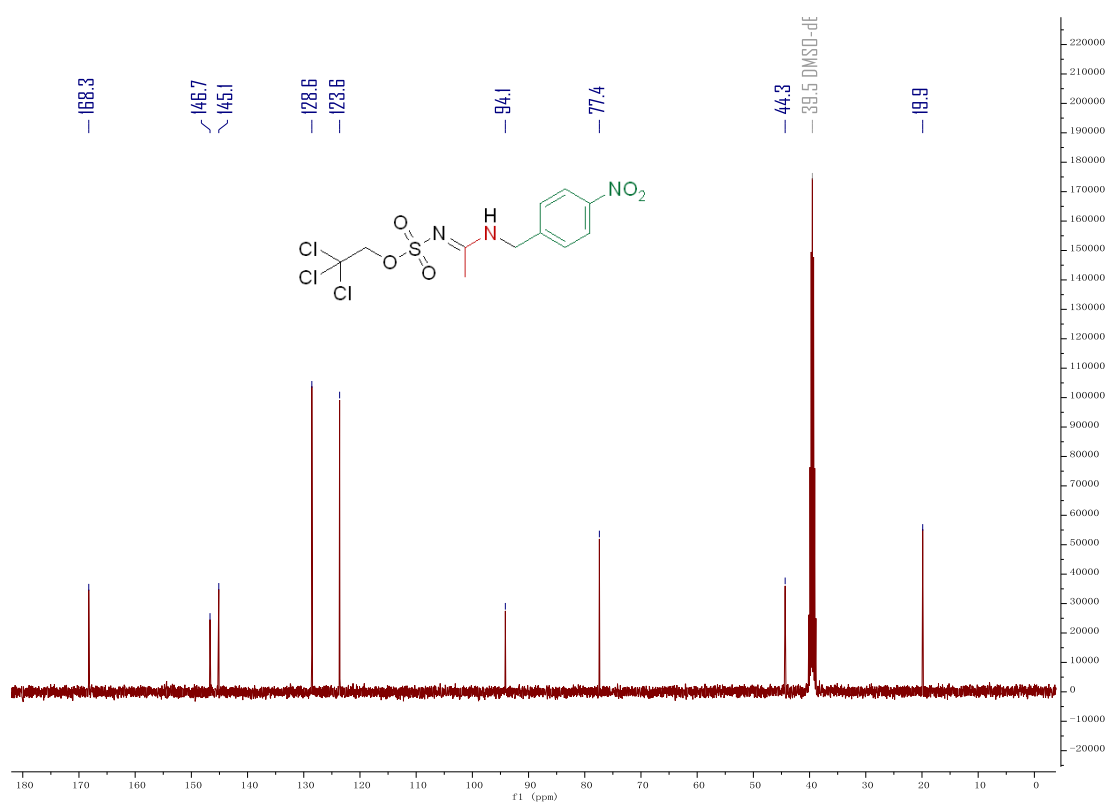

**<sup>1</sup>H NMR (400 MHz, DMSO-*d*<sub>6</sub>) of compound 4ae**

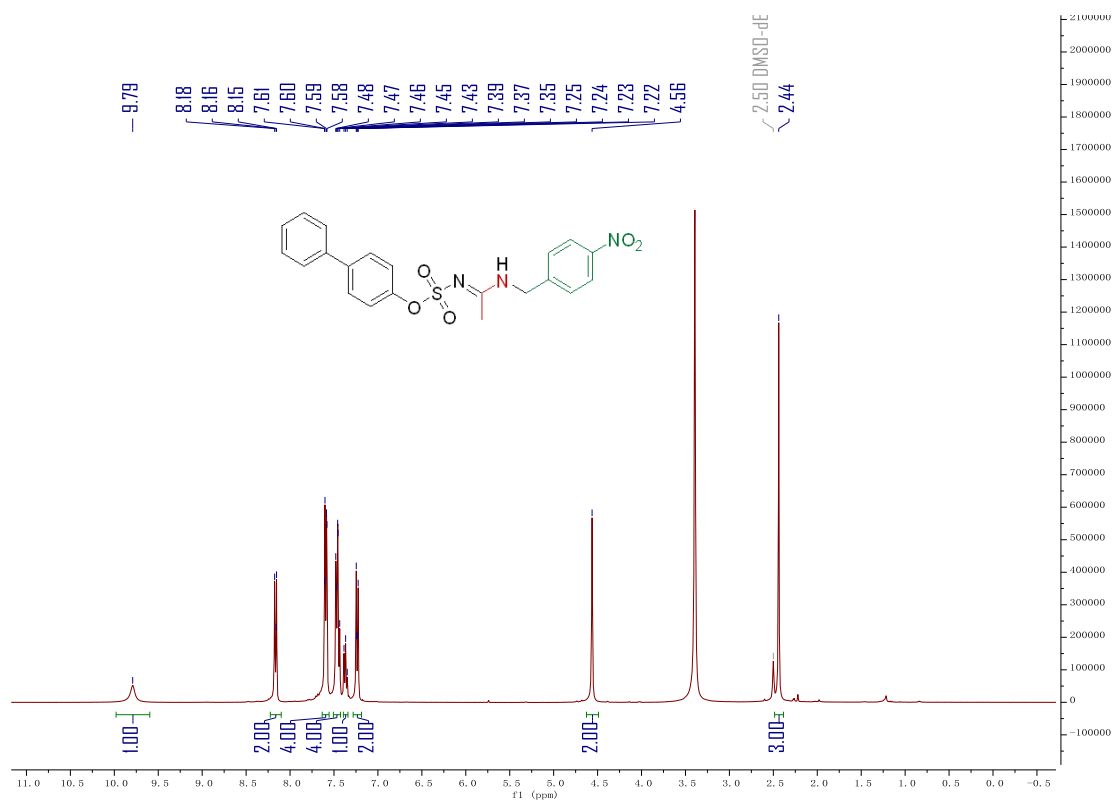

**<sup>13</sup>C NMR (100 MHz, DMSO-*d*<sub>6</sub>) of compound 4ae**

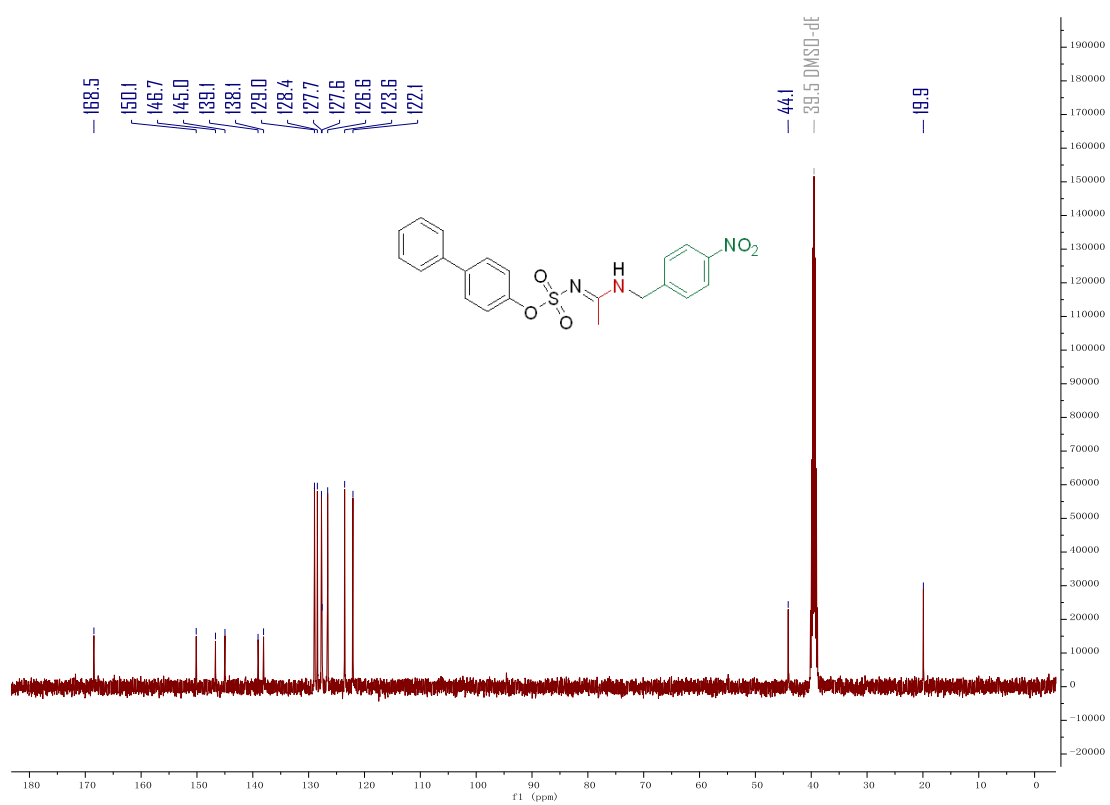

**<sup>1</sup>H NMR (400 MHz, DMSO-*d*<sub>6</sub>) of compound 5a**

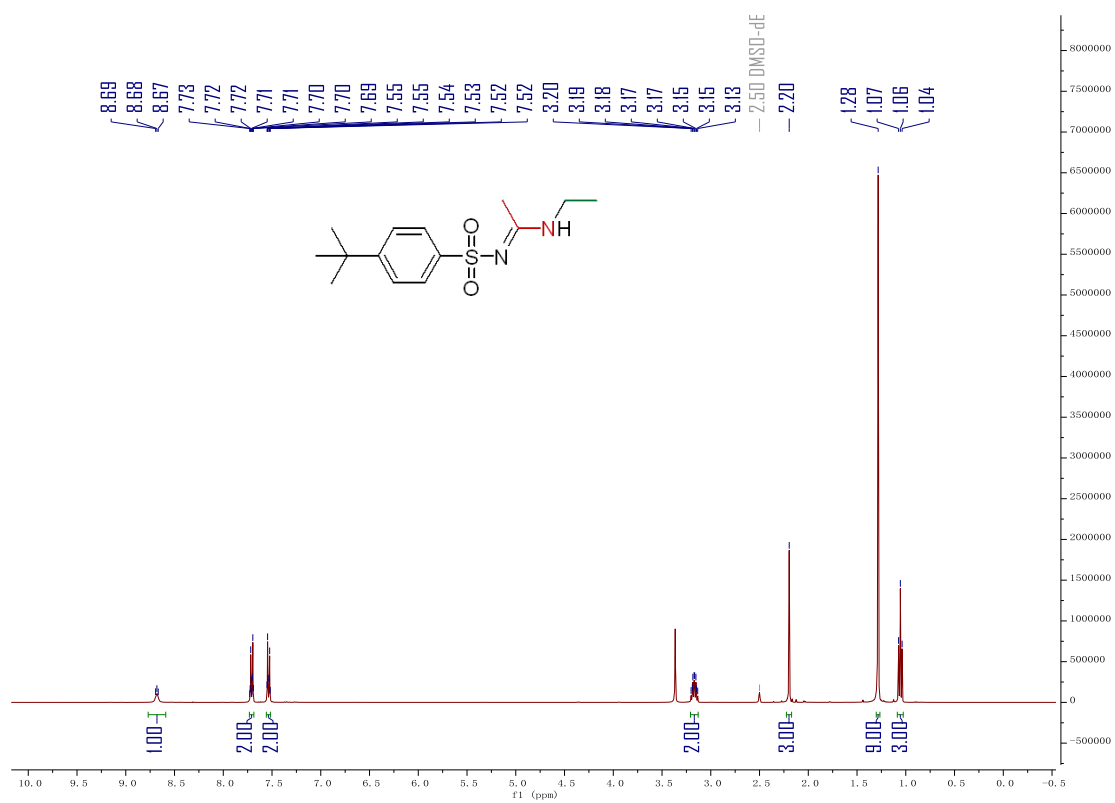

**<sup>13</sup>C NMR (100 MHz, DMSO-*d*<sub>6</sub>) of compound 5a**

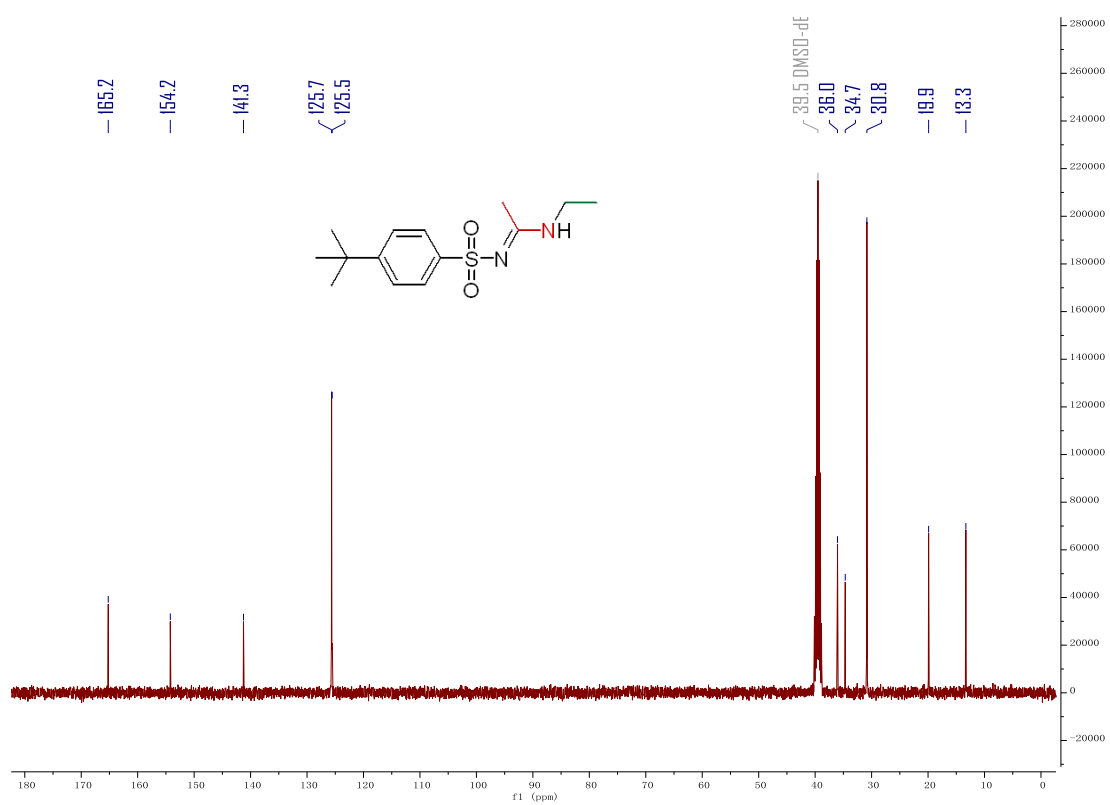

**<sup>1</sup>H NMR (400 MHz, DMSO-*d*<sub>6</sub>) of compound 5b**

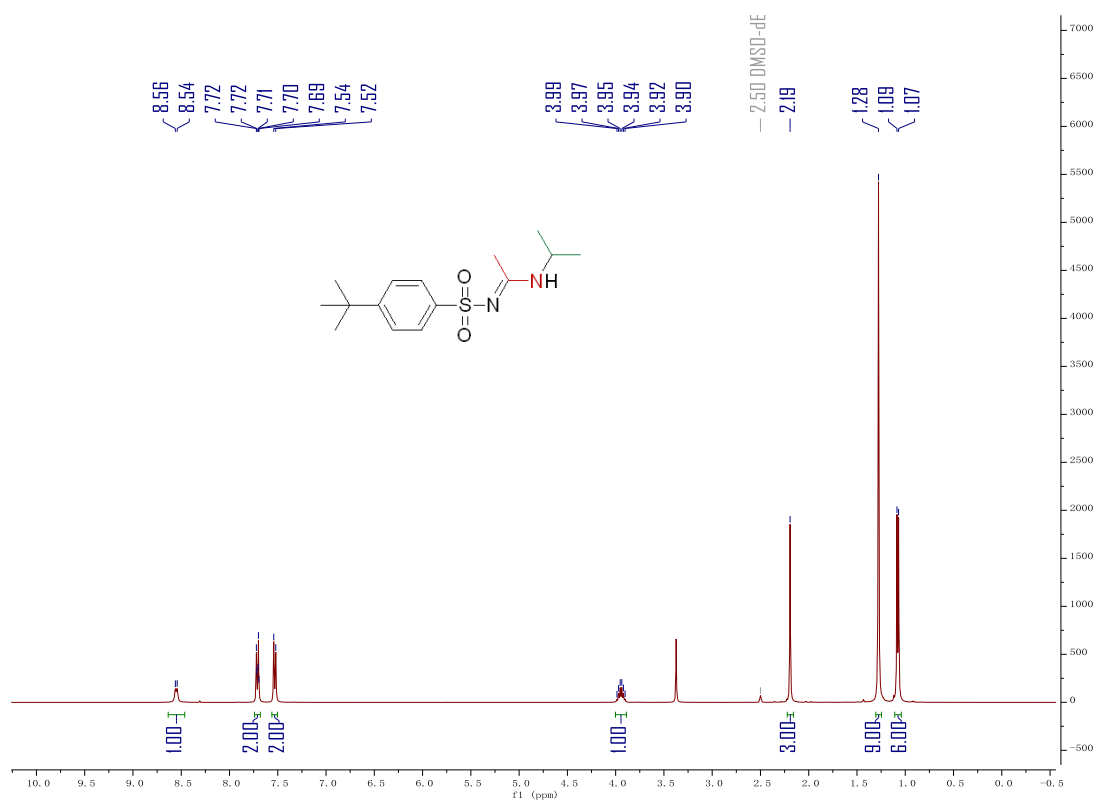

**<sup>13</sup>C NMR (100 MHz, DMSO-*d*<sub>6</sub>) of compound 5b**

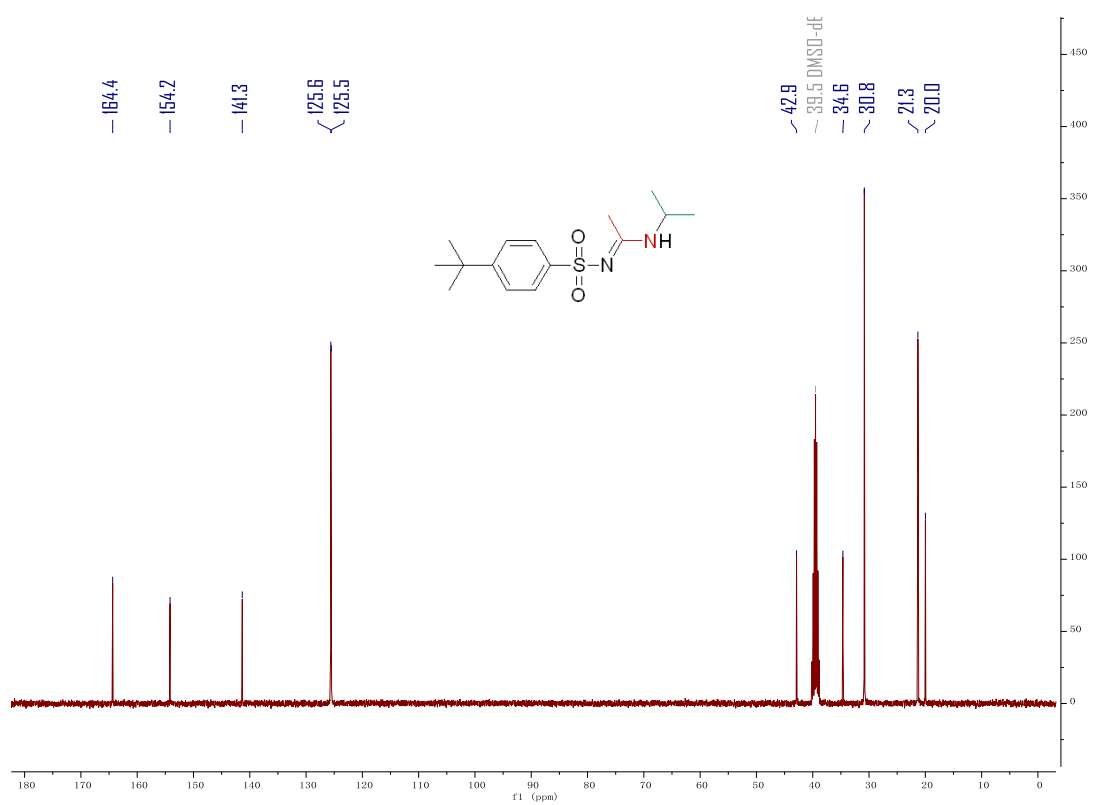

**<sup>1</sup>H NMR (400 MHz, DMSO-*d*<sub>6</sub>) of compound 5c**

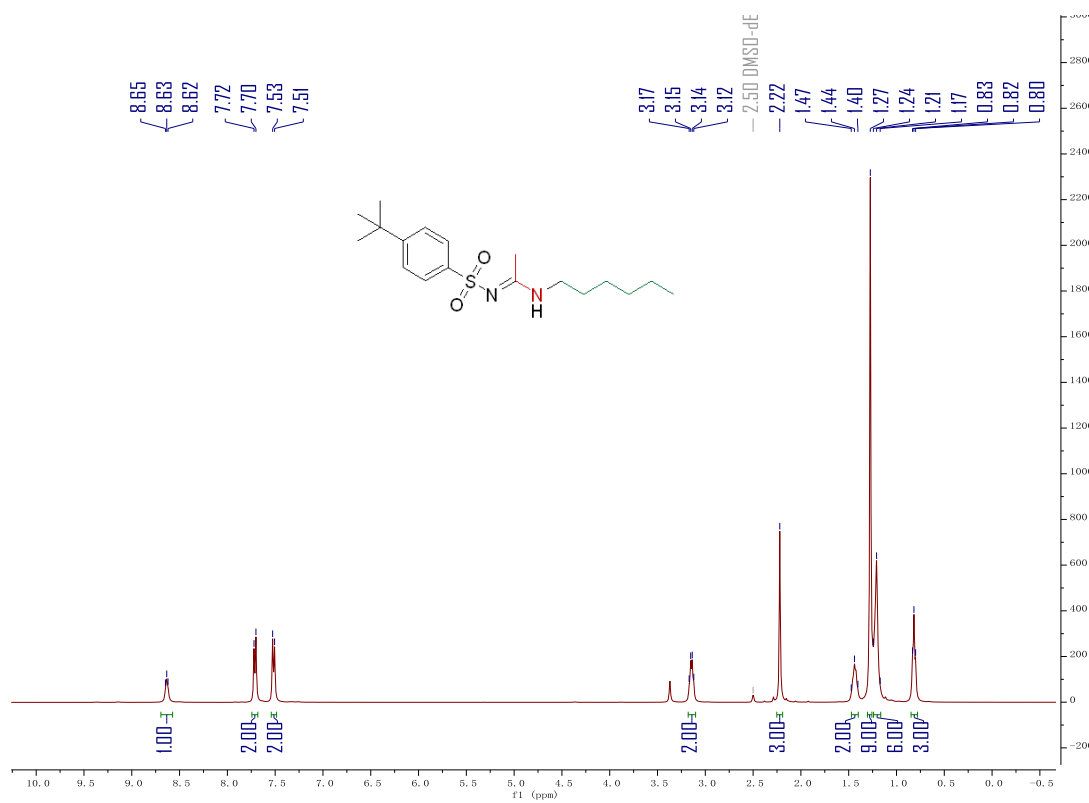

**<sup>13</sup>C NMR (100 MHz, DMSO-*d*<sub>6</sub>) of compound 5c**

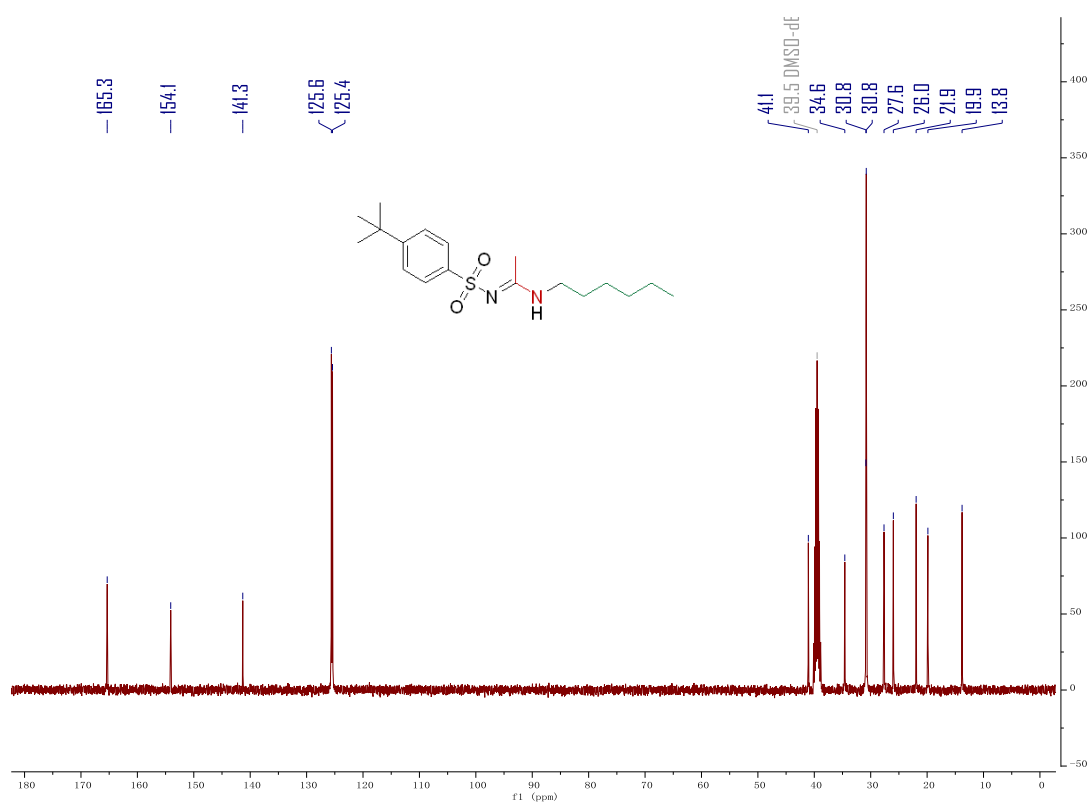

**<sup>1</sup>H NMR (400 MHz, DMSO-*d*<sub>6</sub>) of compound 5d**

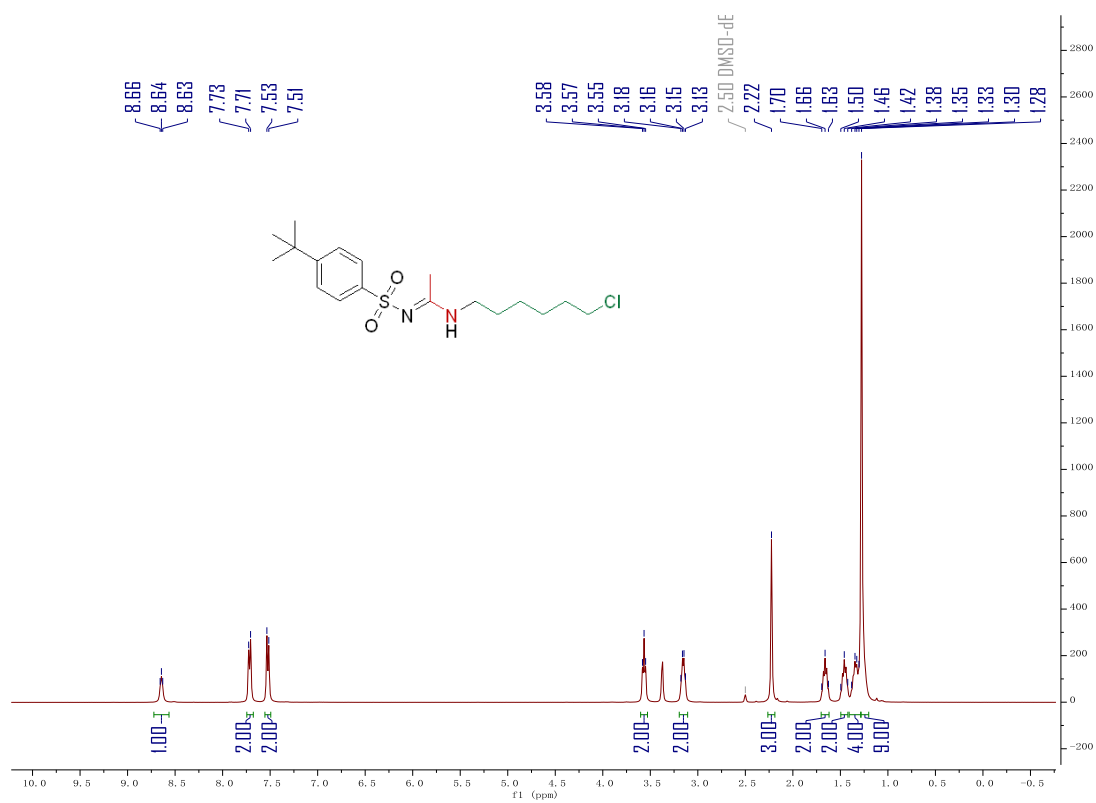

**<sup>13</sup>C NMR (100 MHz, DMSO-*d*<sub>6</sub>) of compound 5d**

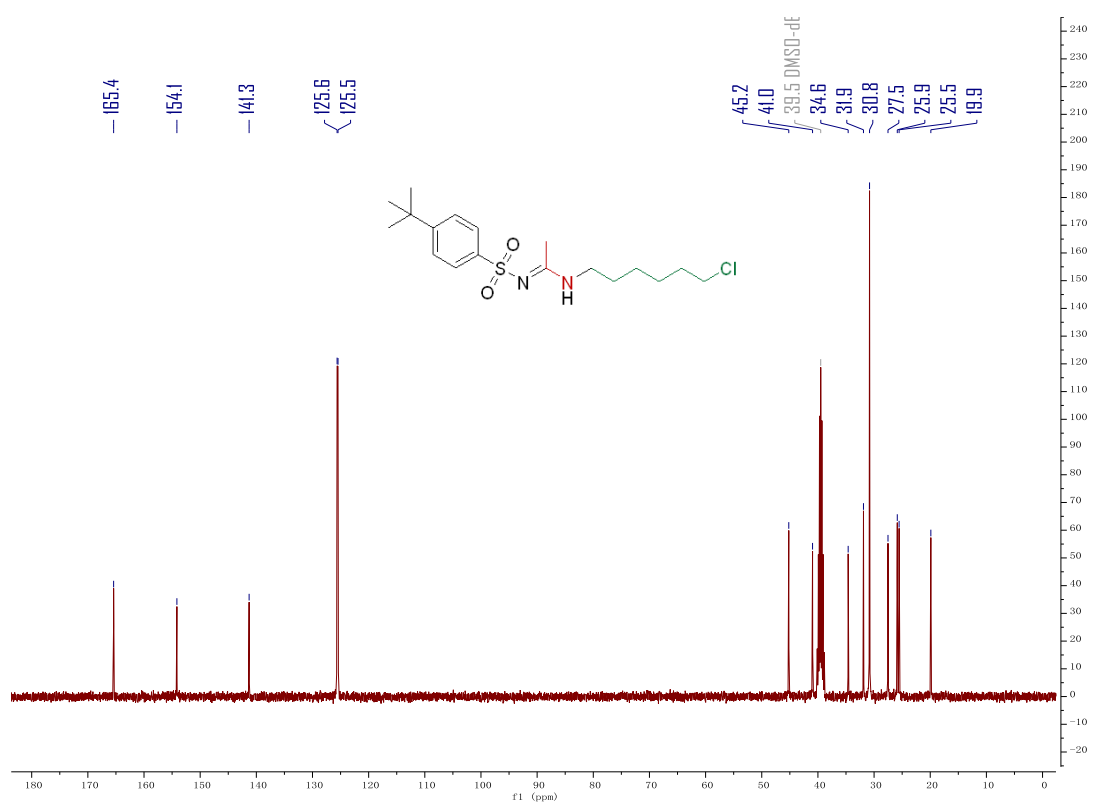

**<sup>1</sup>H NMR (400 MHz, DMSO-*d*<sub>6</sub>) of compound 5e**

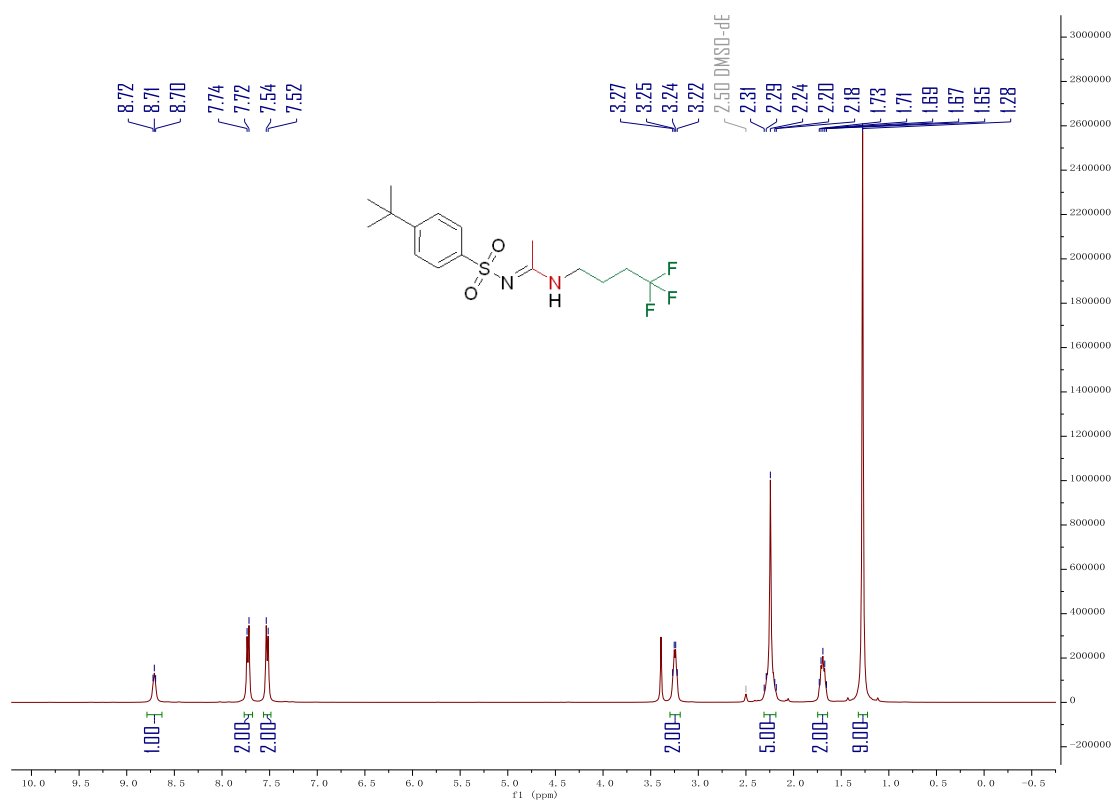

**<sup>13</sup>C NMR (100 MHz, DMSO-*d*<sub>6</sub>) of compound 5e**

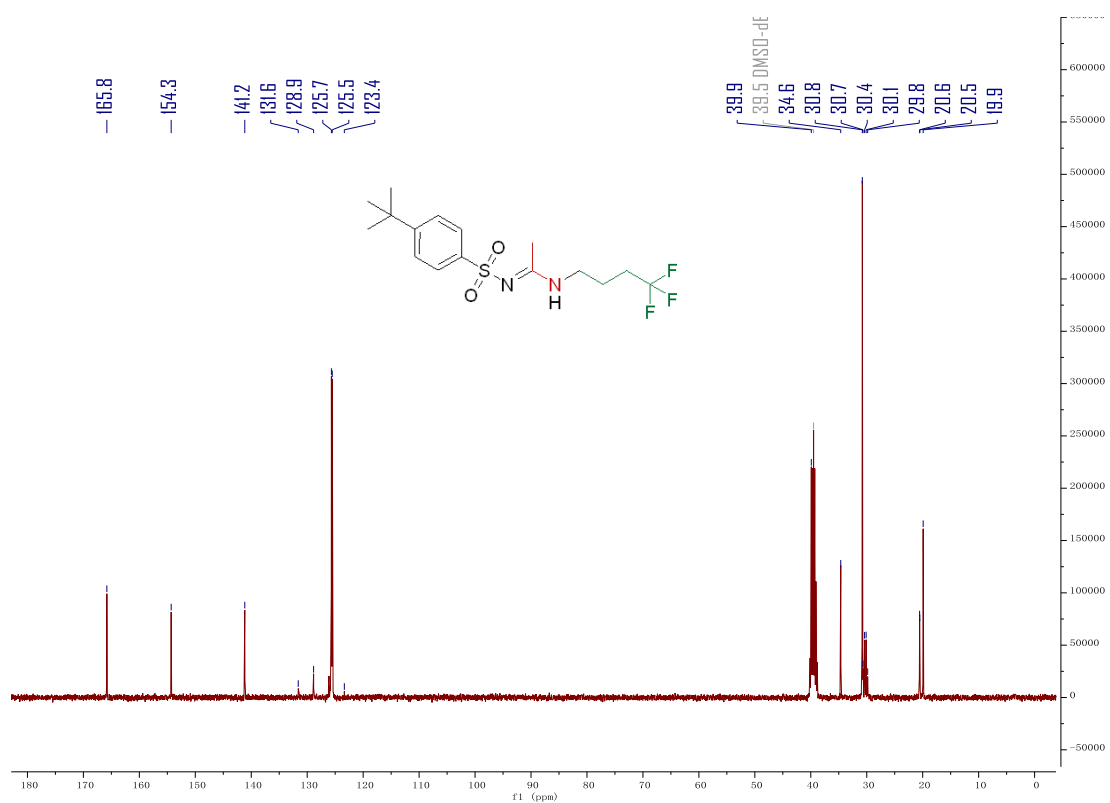

<sup>19</sup>F NMR (376 MHz, DMSO-*d*<sub>6</sub>) of compound **5e**

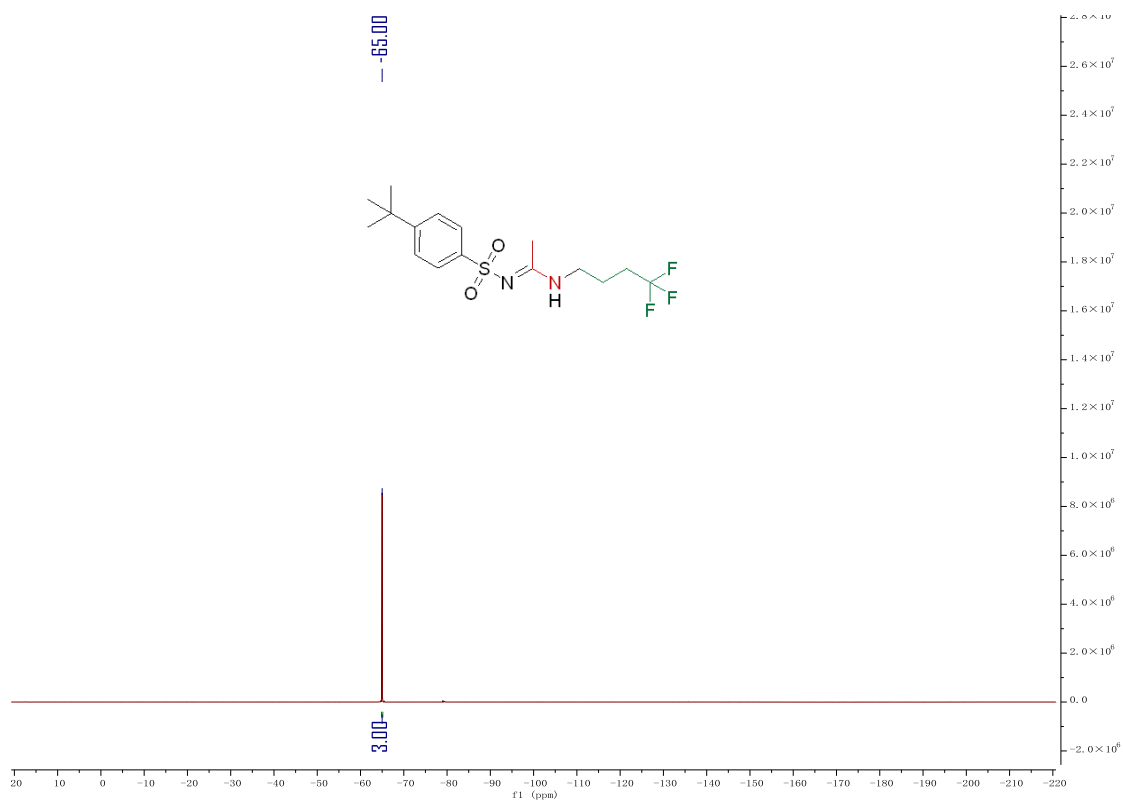



**<sup>1</sup>H NMR (400 MHz, DMSO-*d*<sub>6</sub>) of compound 5f**

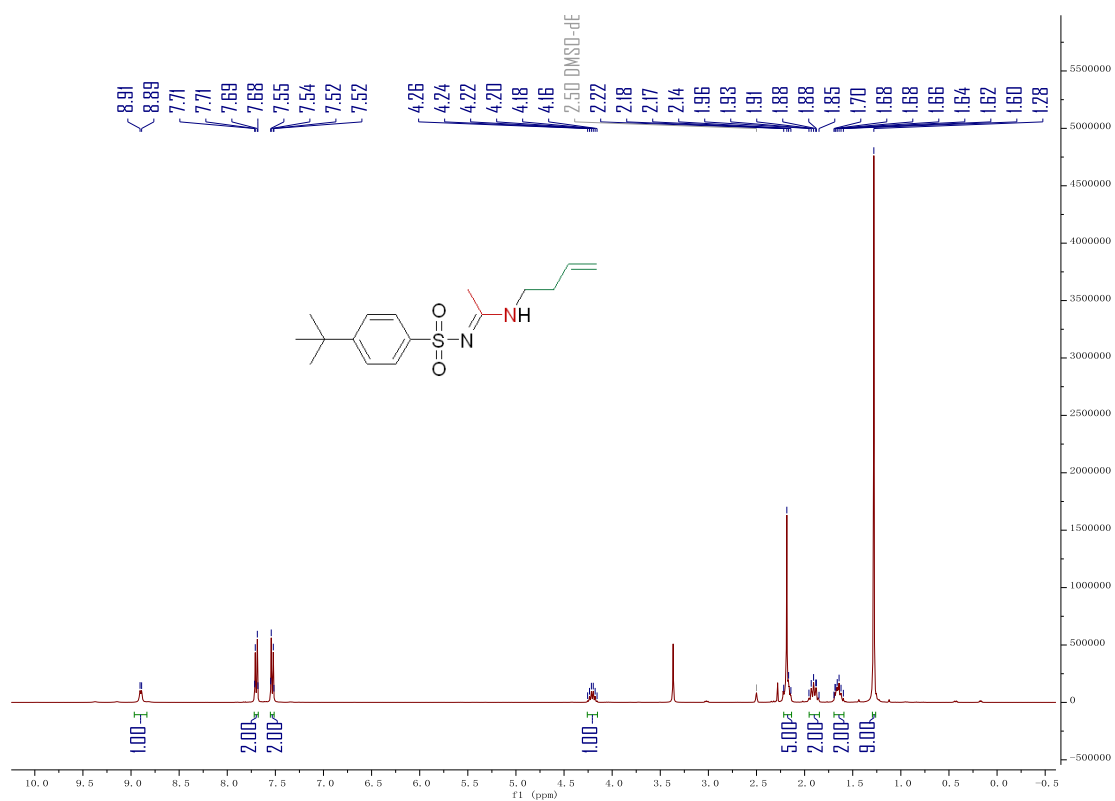

**<sup>13</sup>C NMR (100 MHz, DMSO-*d*<sub>6</sub>) of compound 5f**

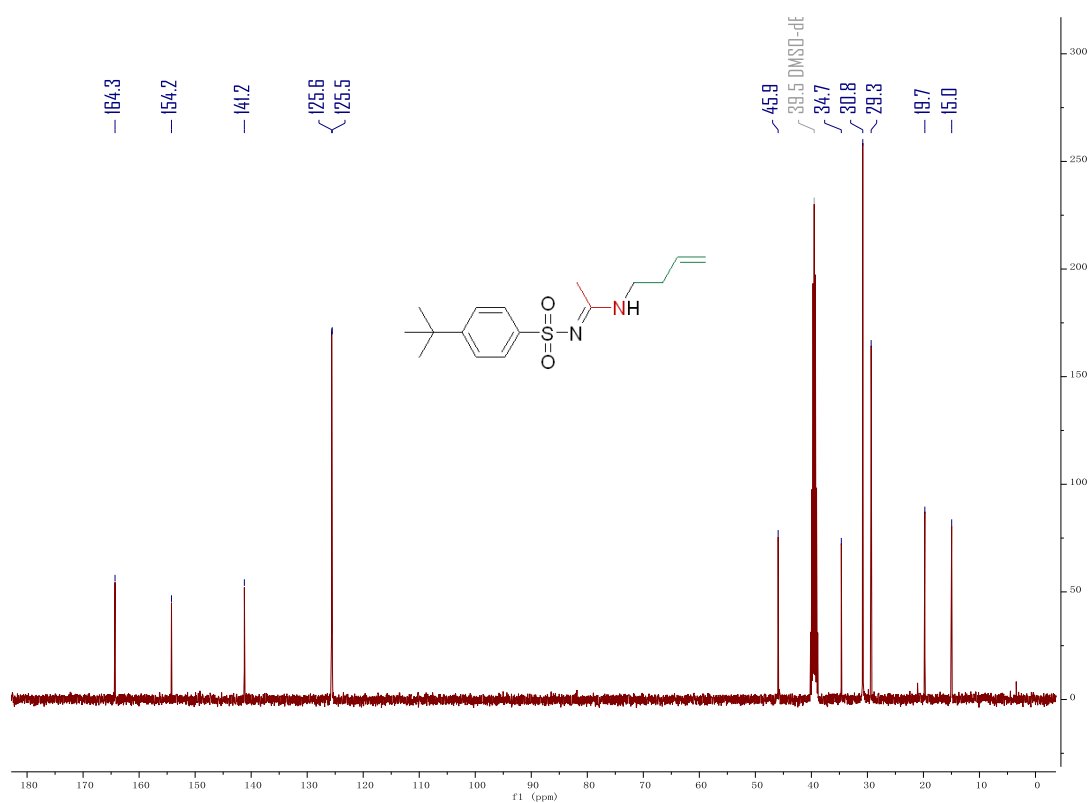

<sup>1</sup>H NMR (400 MHz, Chloroform-*d*) of compound **5g**

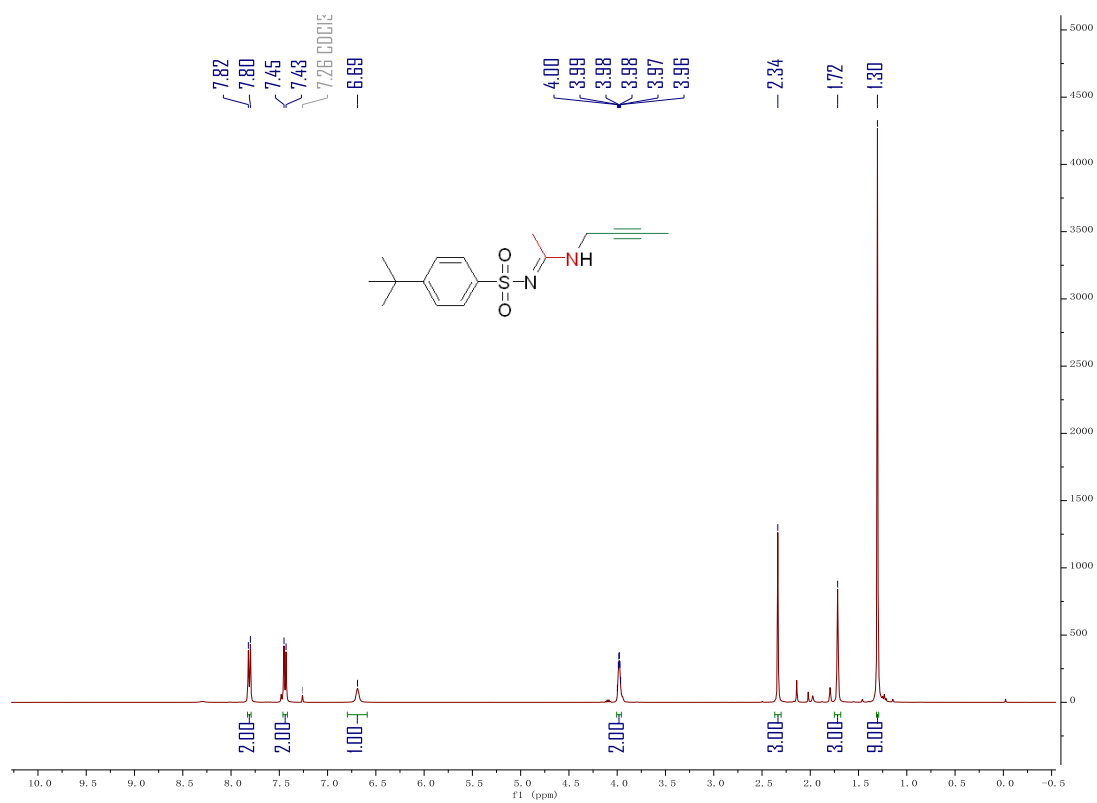

<sup>13</sup>C NMR (100 MHz, Chloroform-*d*) of compound **5g**

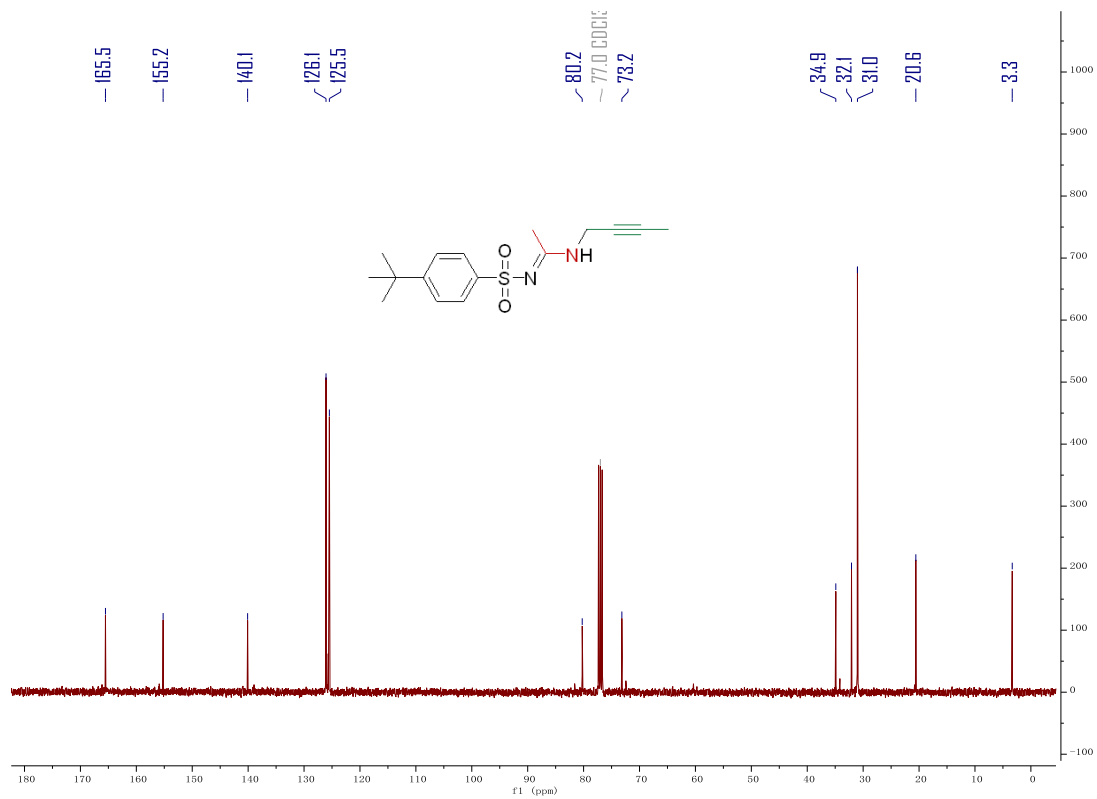

**<sup>1</sup>H NMR (400 MHz, DMSO-*d*<sub>6</sub>) of compound 5h**

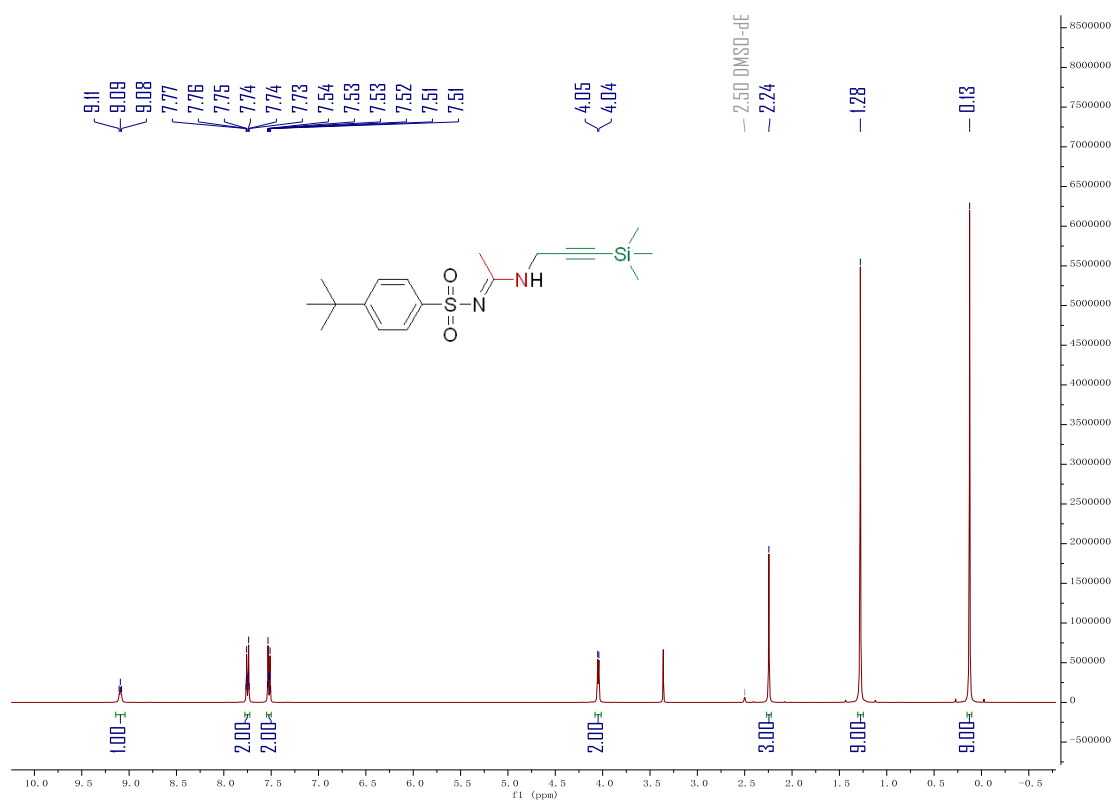

**<sup>13</sup>C NMR (100 MHz, DMSO-*d*<sub>6</sub>) of compound 5h**

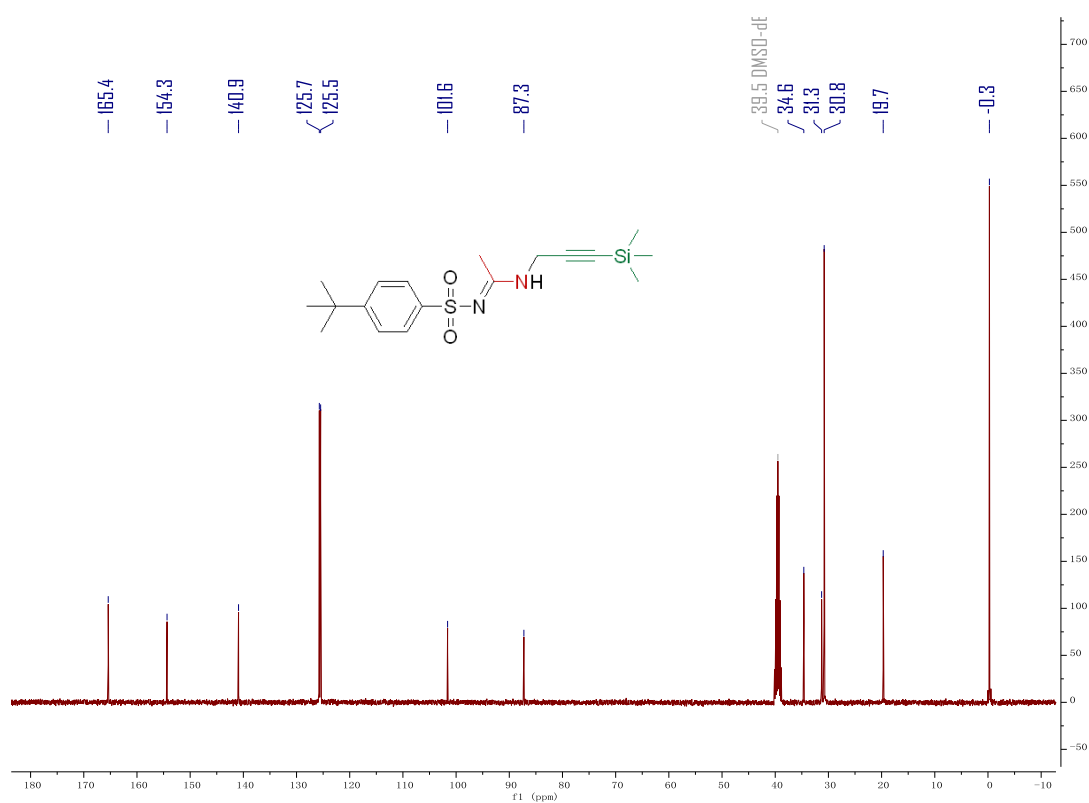

**<sup>1</sup>H NMR (400 MHz, DMSO-*d*<sub>6</sub>) of compound **5i****

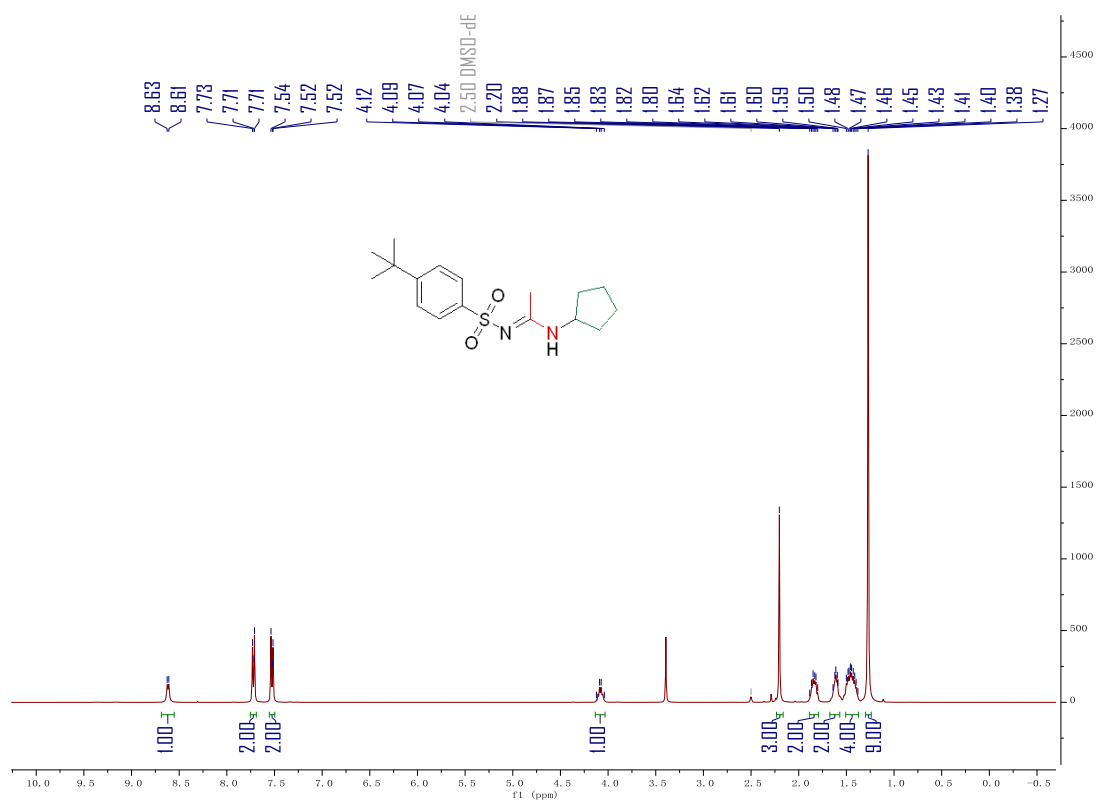

**<sup>13</sup>C NMR (100 MHz, DMSO-*d*<sub>6</sub>) of compound **5i****

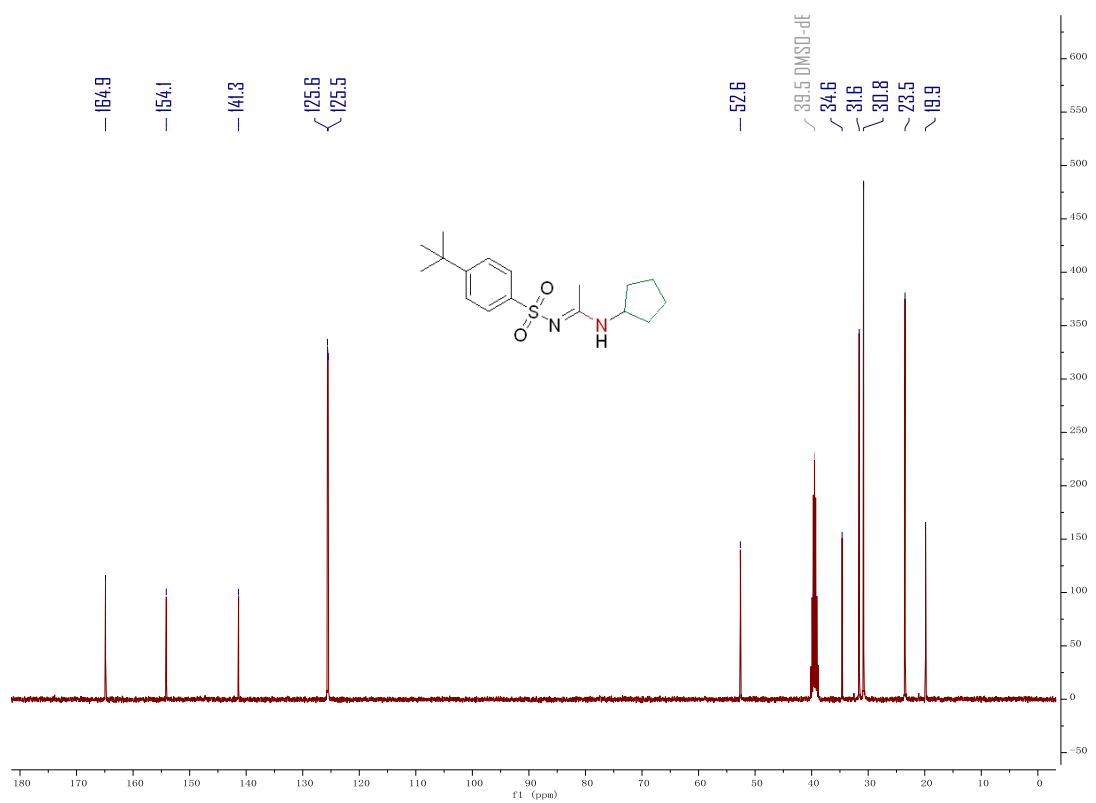

**<sup>1</sup>H NMR (400 MHz, DMSO-*d*<sub>6</sub>) of compound 5j**

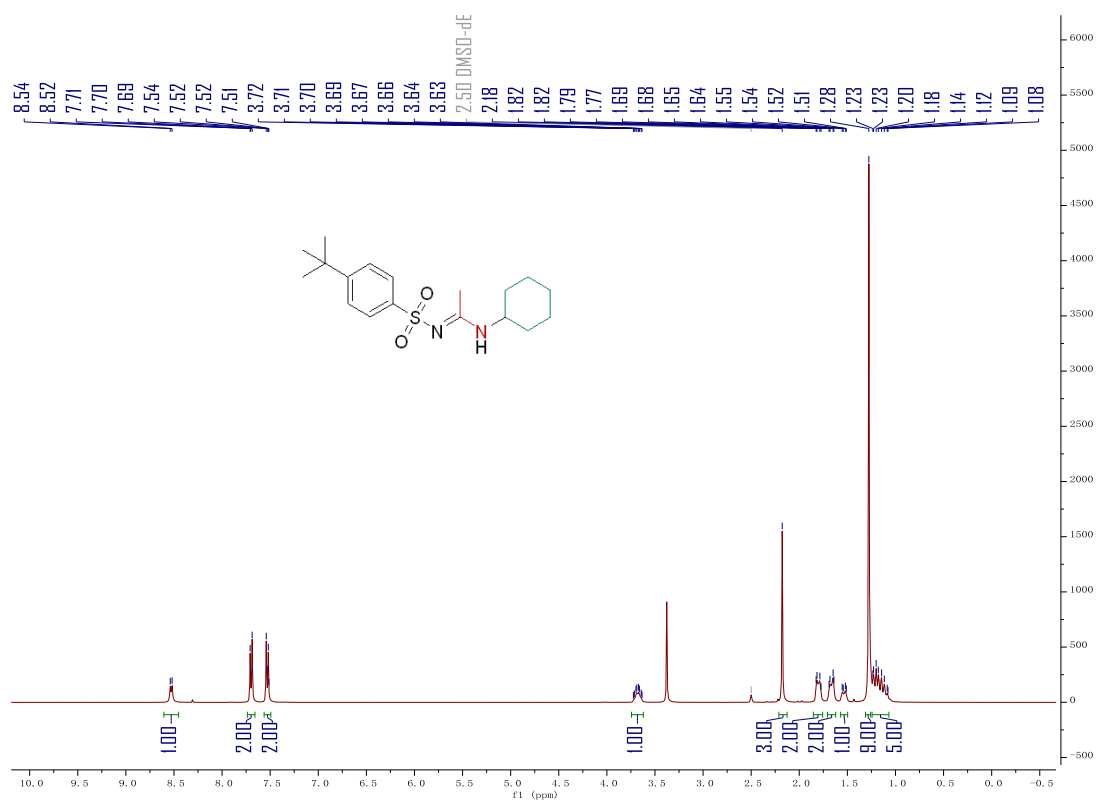

**<sup>13</sup>C NMR (100 MHz, DMSO-*d*<sub>6</sub>) of compound 5j**

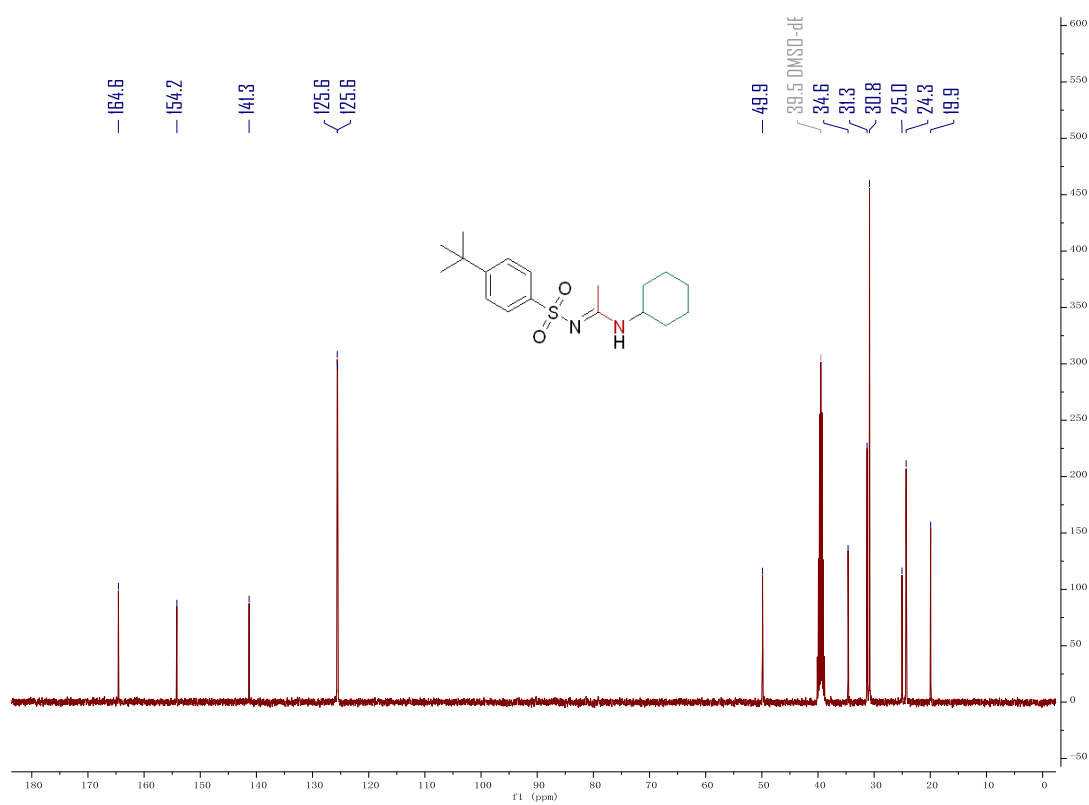

<sup>1</sup>H NMR (400 MHz, DMSO-d<sub>6</sub>) of compound **5k**

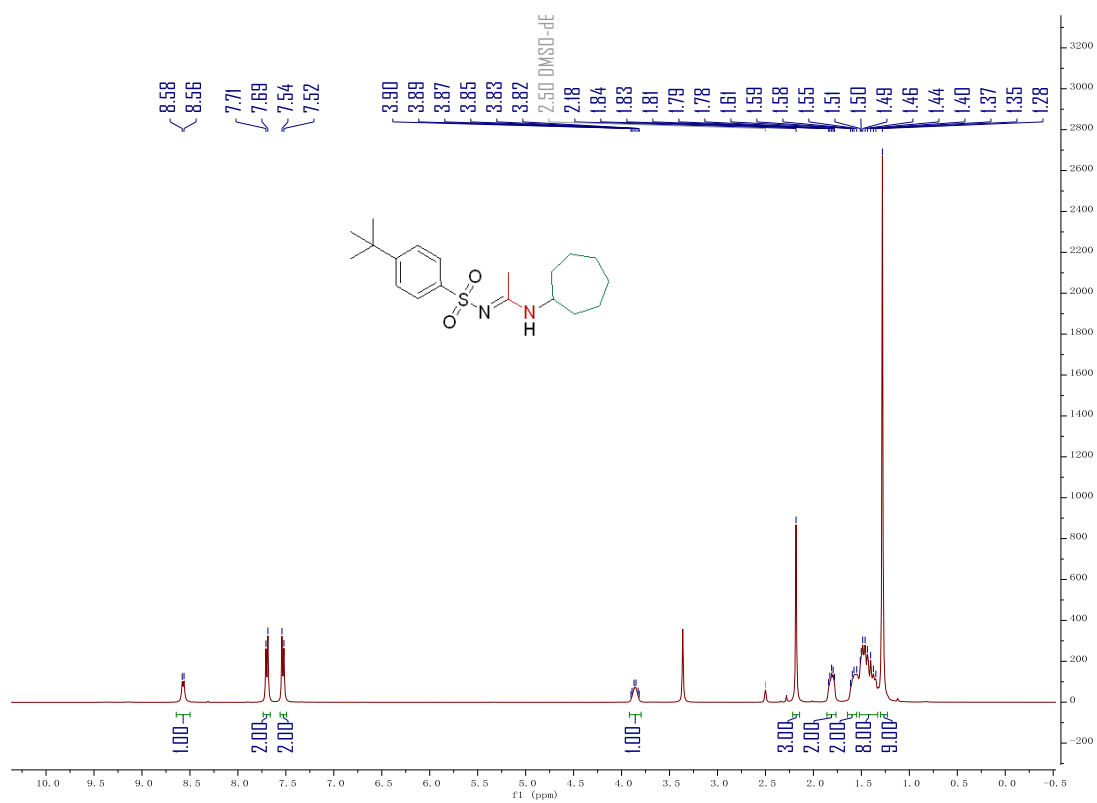

<sup>13</sup>C NMR (100 MHz, DMSO-d<sub>6</sub>) of compound **5k**

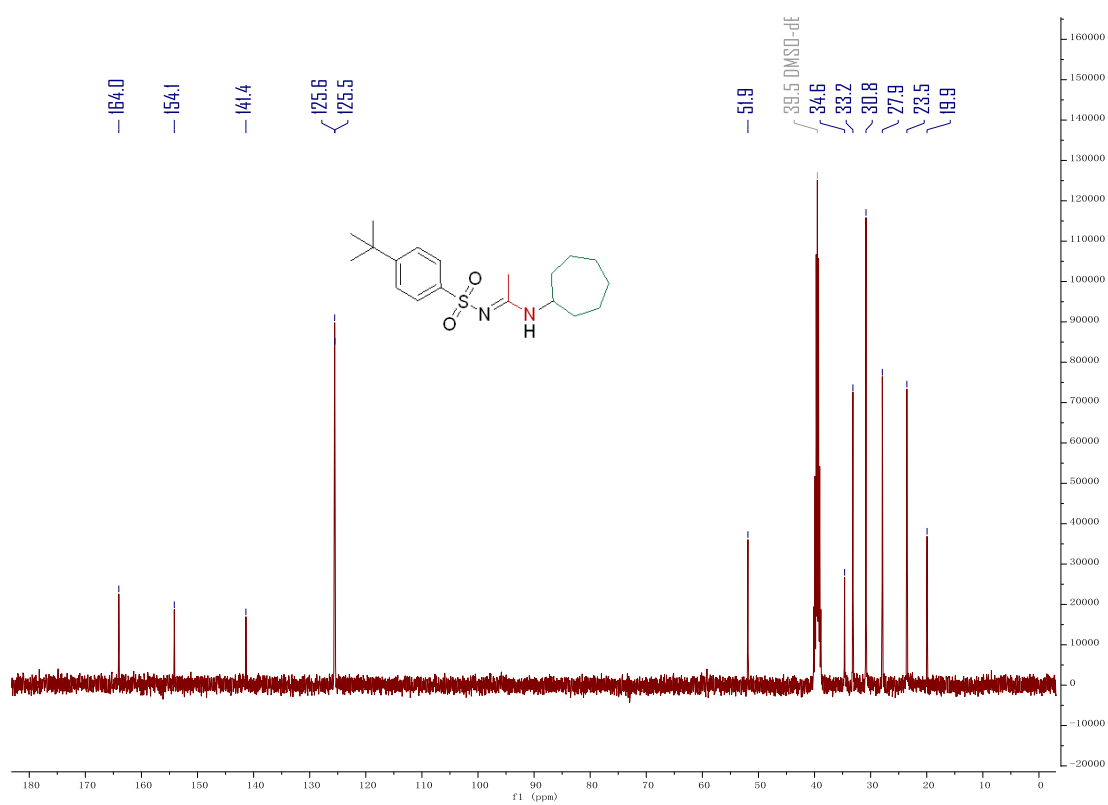

**<sup>1</sup>H NMR (400 MHz, DMSO-*d*<sub>6</sub>) of compound 51**

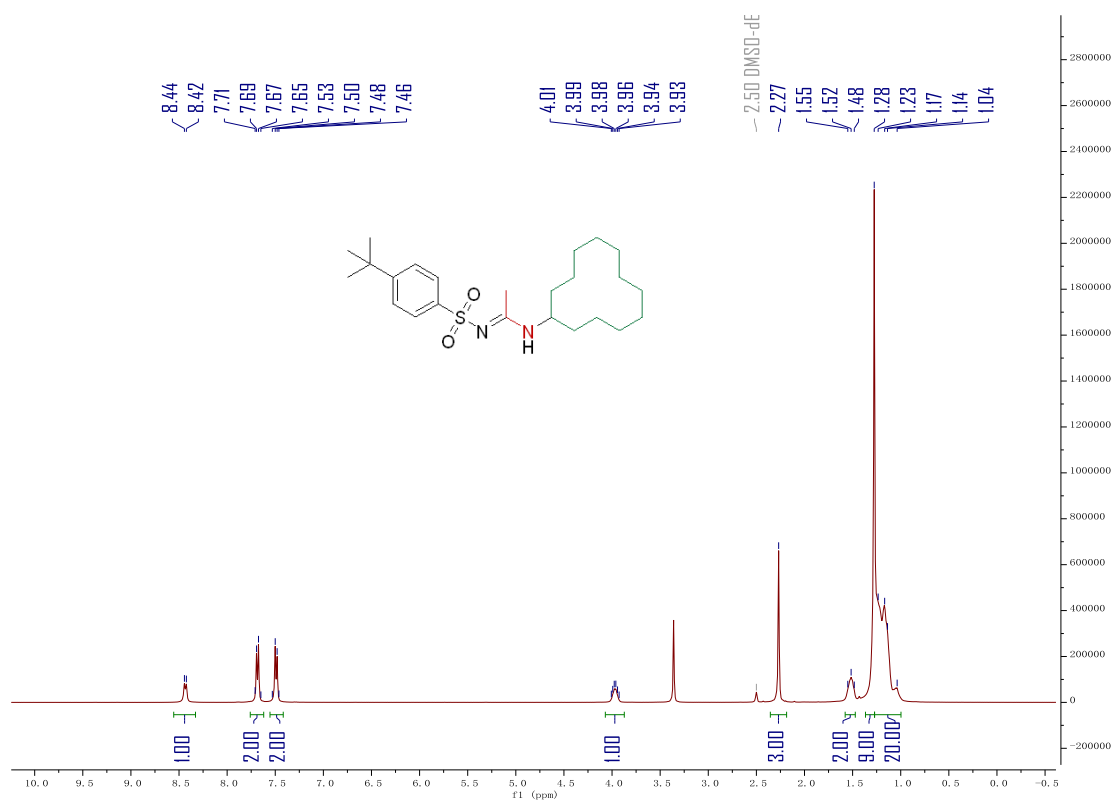

**<sup>13</sup>C NMR (100 MHz, DMSO-*d*<sub>6</sub>) of compound 51**

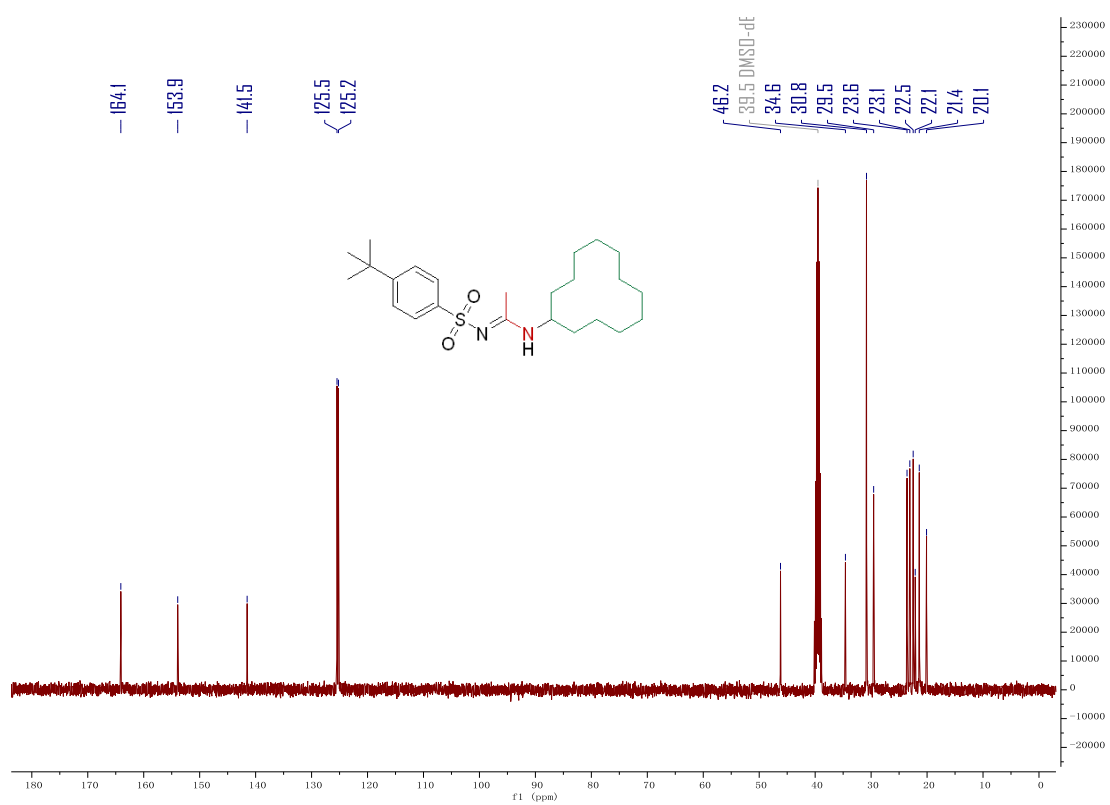





**<sup>1</sup>H NMR (400 MHz, DMSO-*d*<sub>6</sub>) of compound 5n**

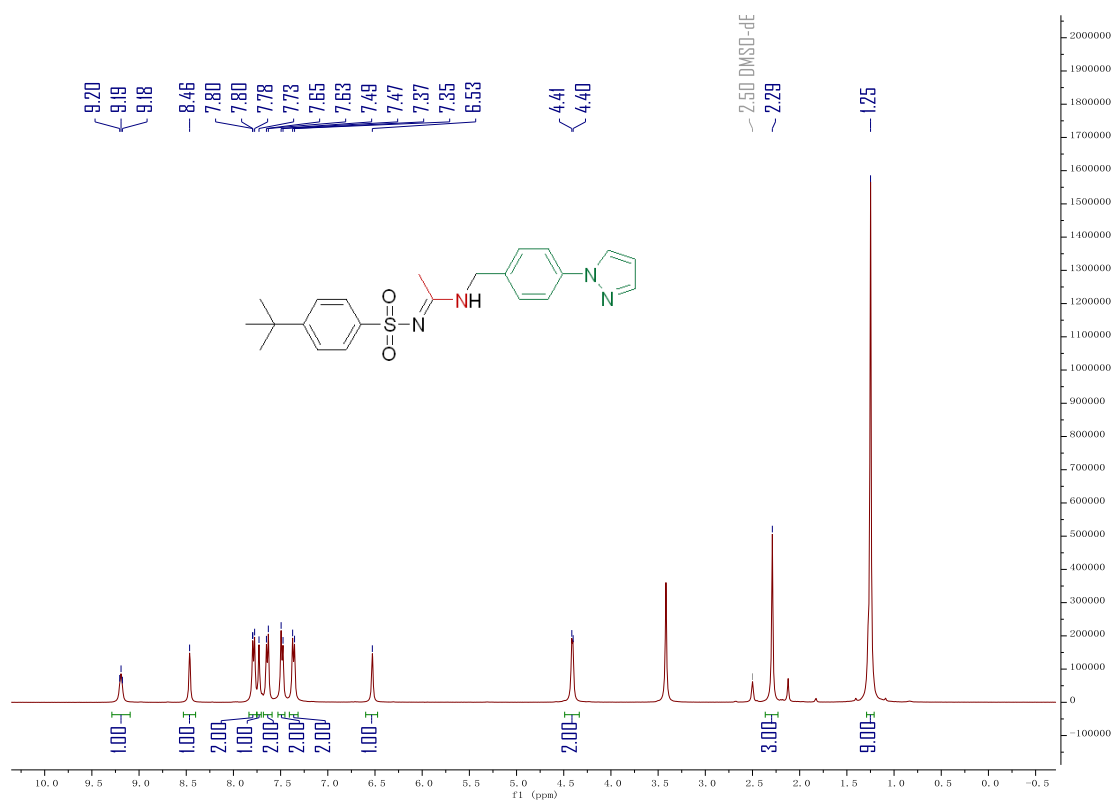

**<sup>13</sup>C NMR (100 MHz, DMSO-*d*<sub>6</sub>) of compound 5n**

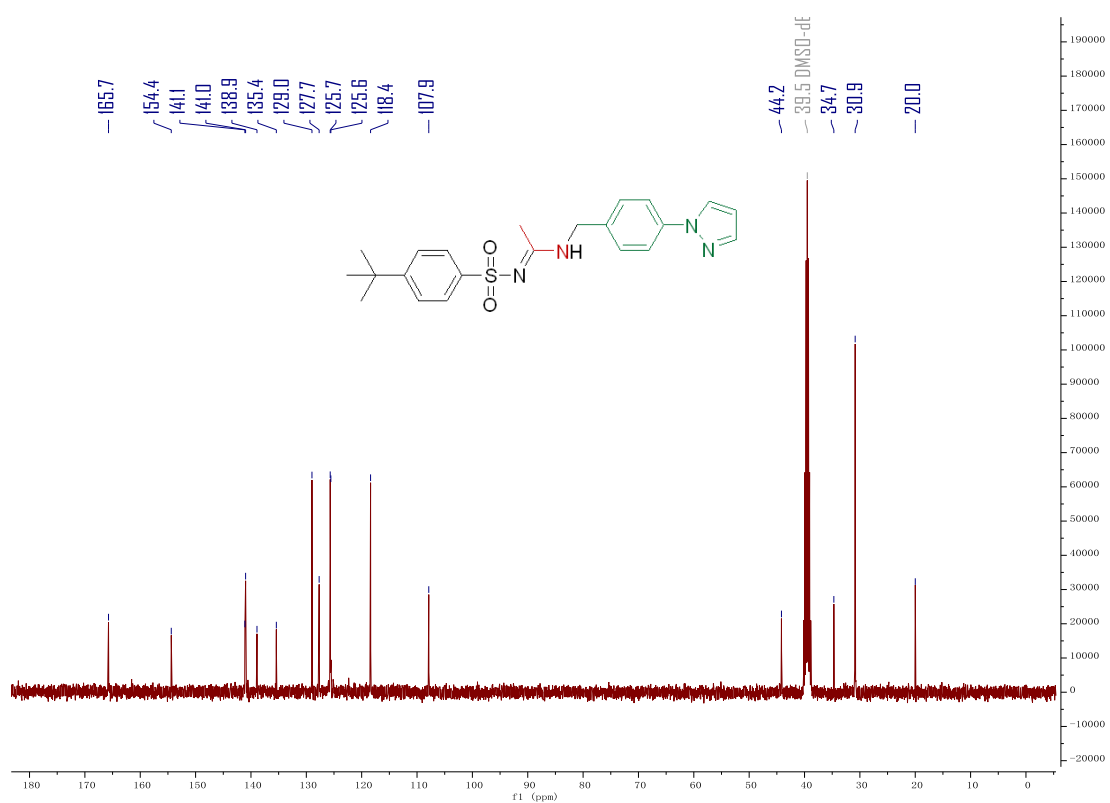

**<sup>1</sup>H NMR (400 MHz, DMSO-*d*<sub>6</sub>) of compound 5o**

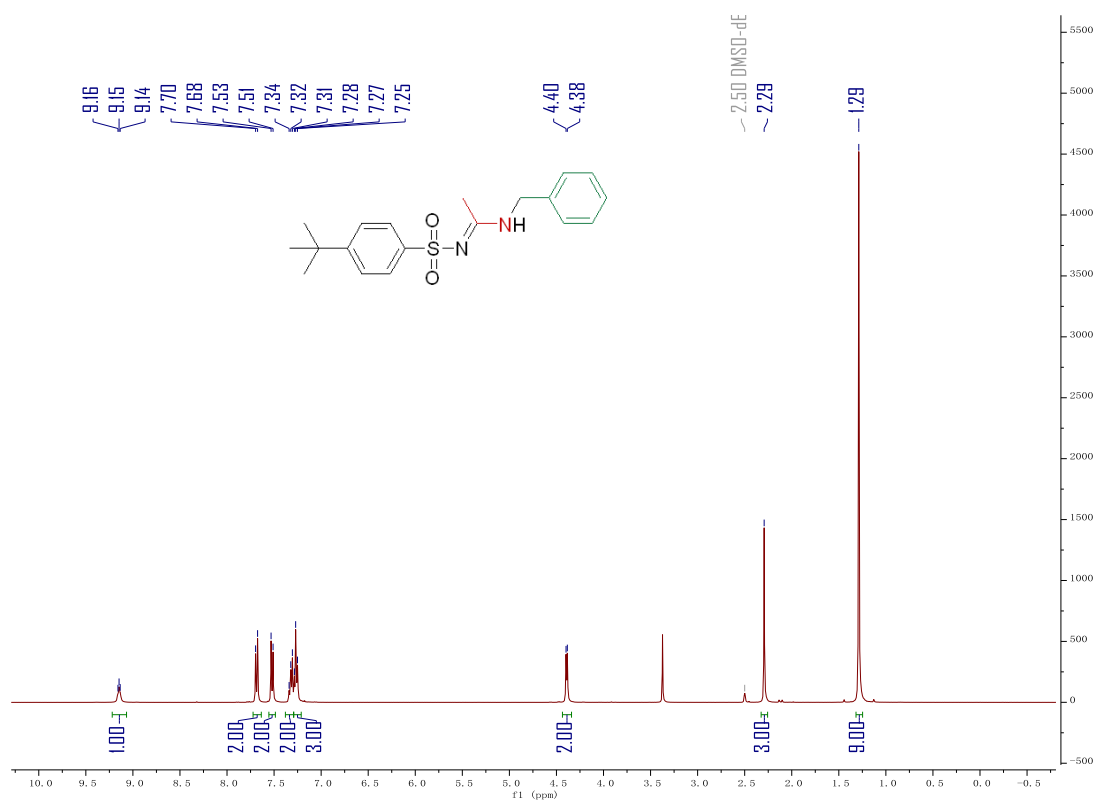

**<sup>13</sup>C NMR (100 MHz, DMSO-*d*<sub>6</sub>) of compound 5o**

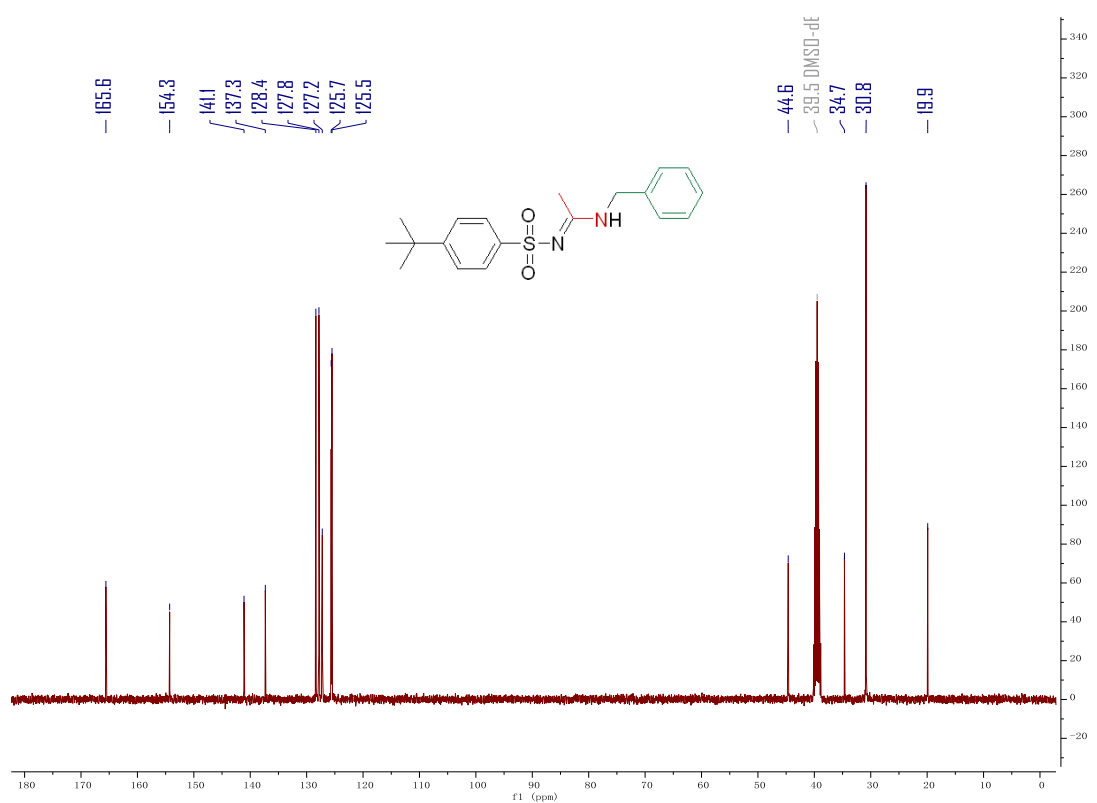

**<sup>1</sup>H NMR (400 MHz, DMSO-*d*<sub>6</sub>) of compound 5p**

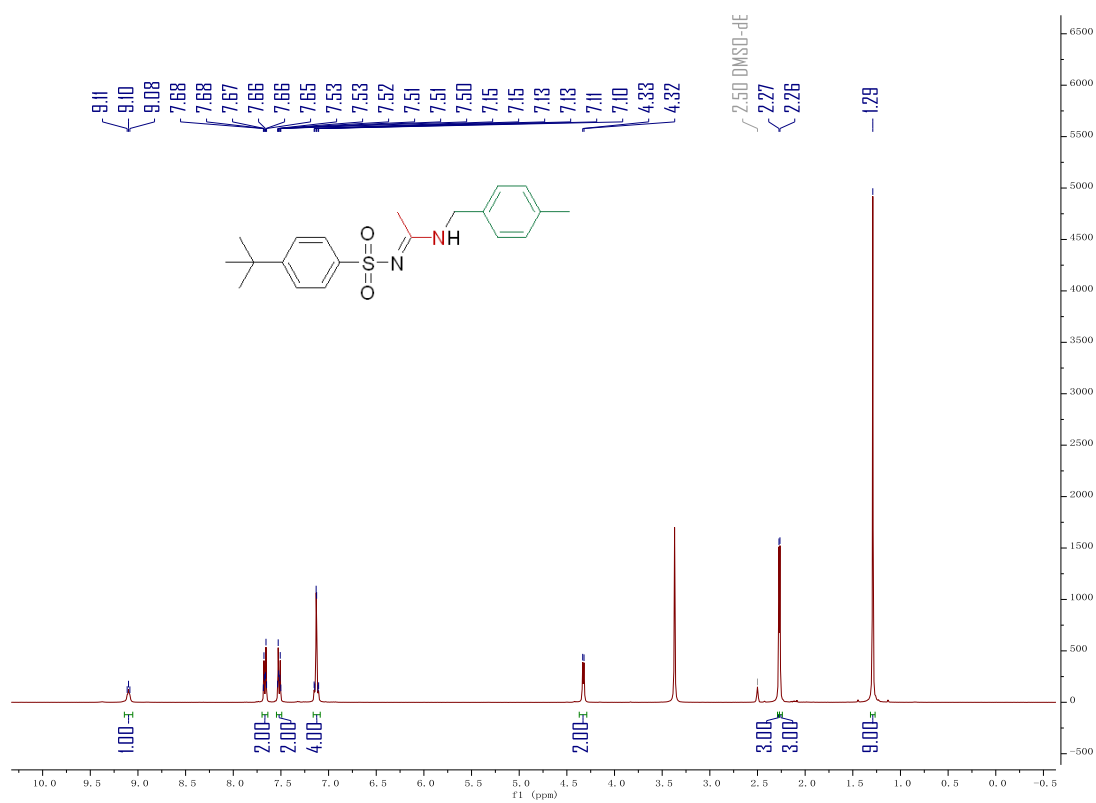

**<sup>13</sup>C NMR (100 MHz, DMSO-*d*<sub>6</sub>) of compound 5p**

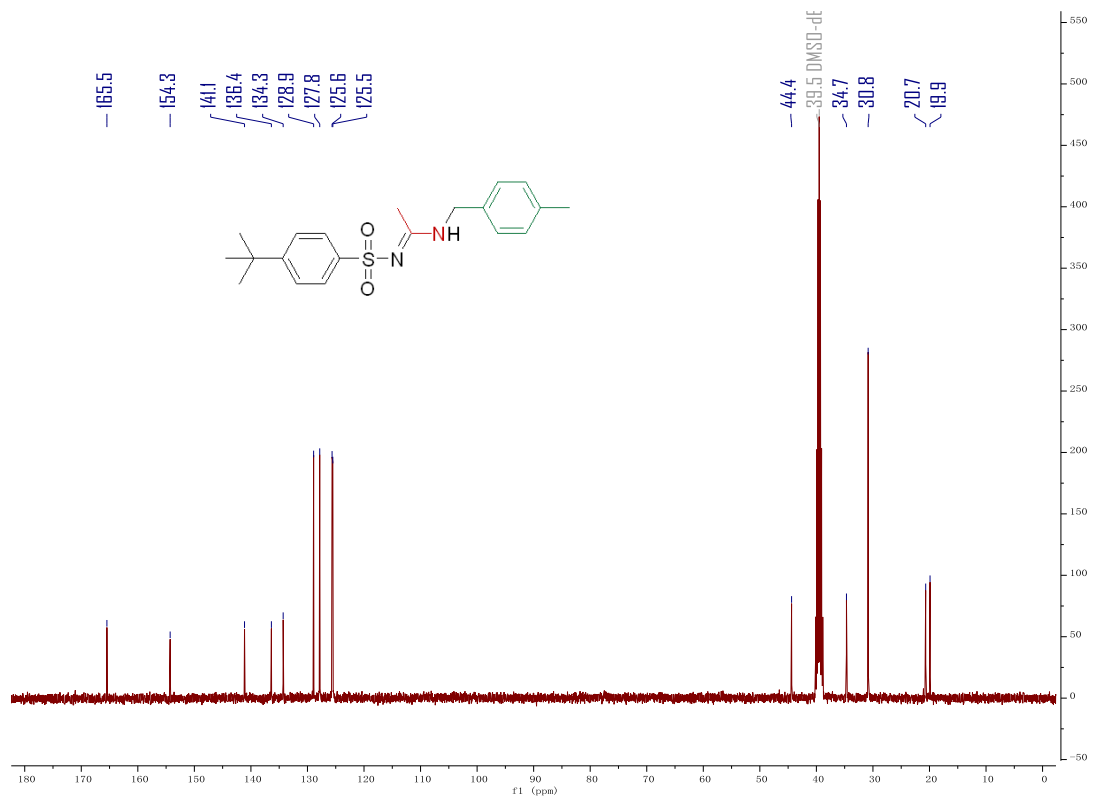

**<sup>1</sup>H NMR (400 MHz, DMSO-*d*<sub>6</sub>) of compound 5q**

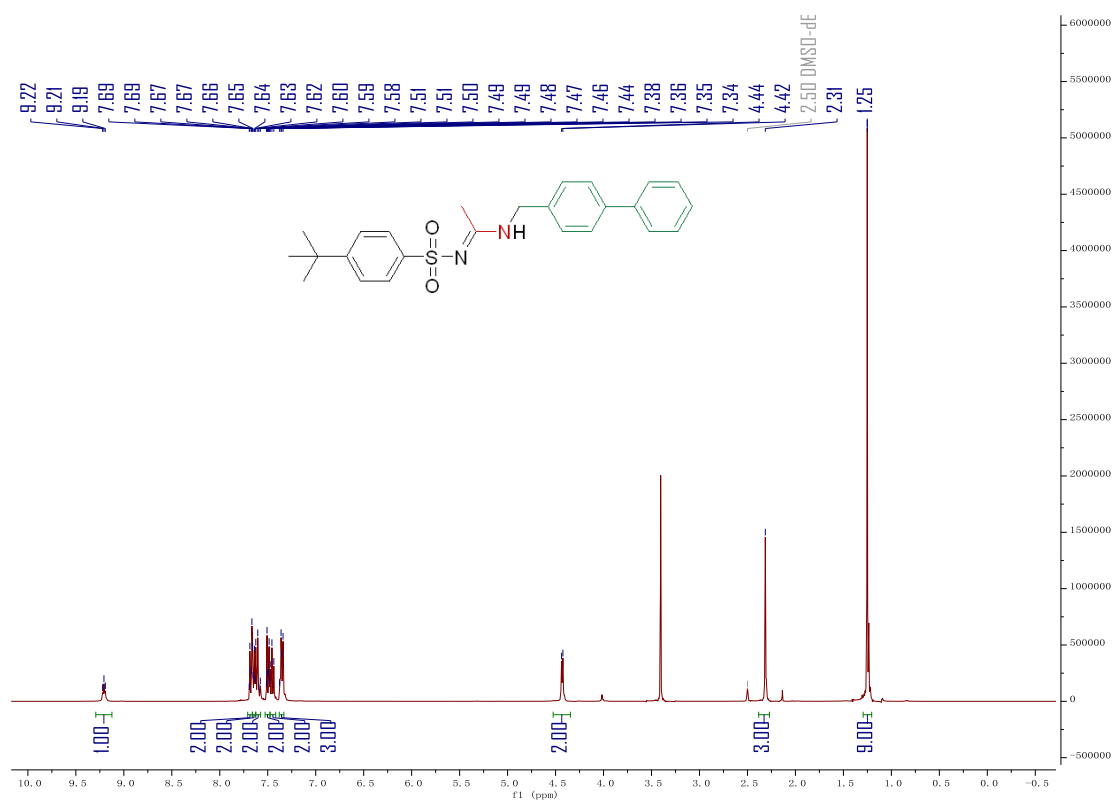

**<sup>13</sup>C NMR (100 MHz, DMSO-*d*<sub>6</sub>) of compound 5q**

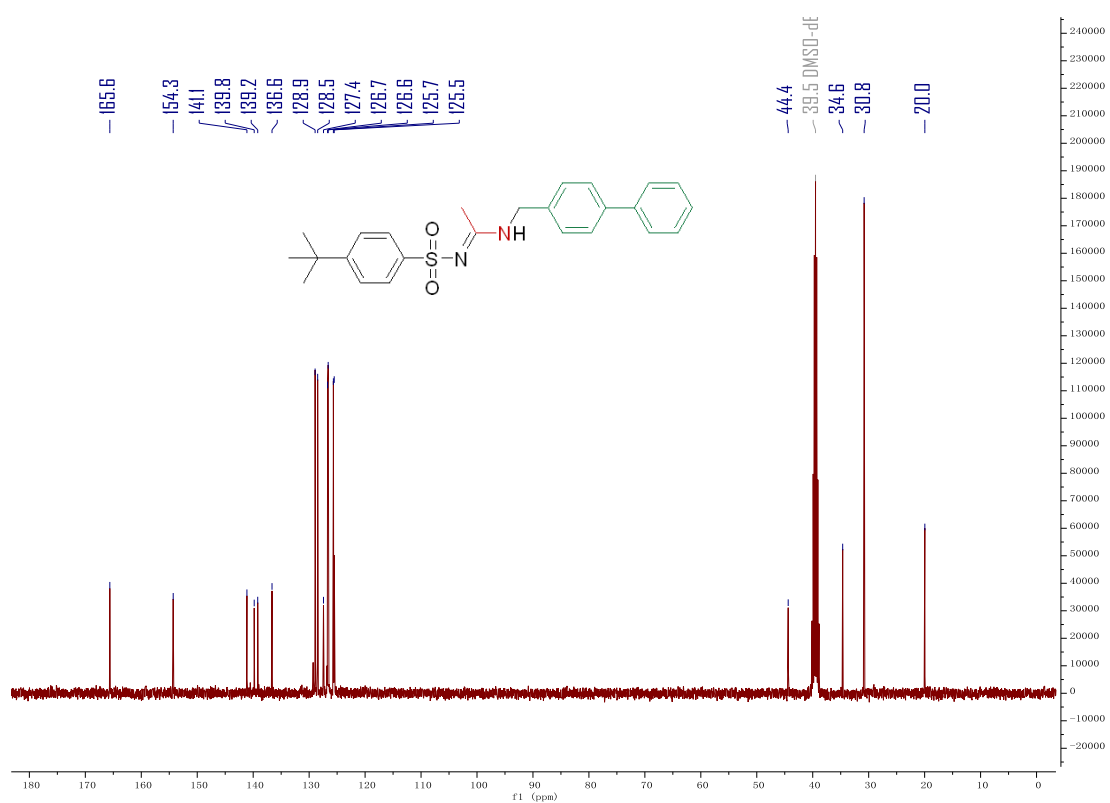

**<sup>1</sup>H NMR (400 MHz, DMSO-*d*<sub>6</sub>) of compound 5r**

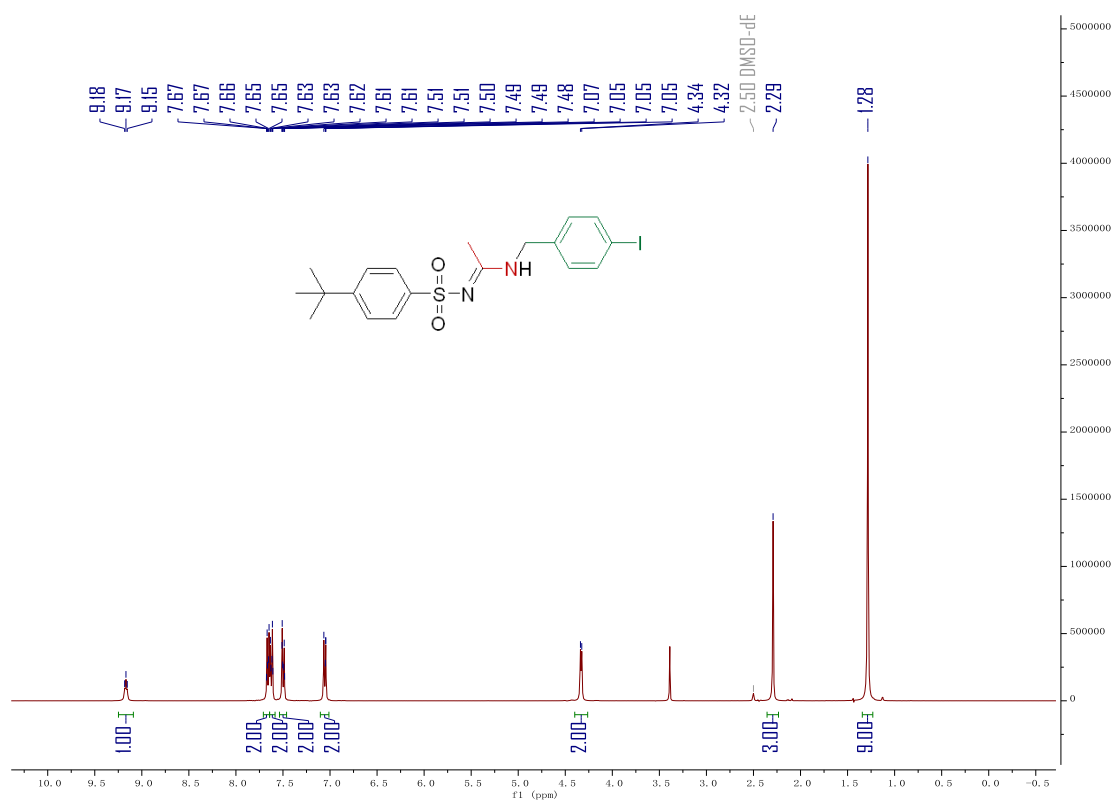

**<sup>13</sup>C NMR (100 MHz, DMSO-*d*<sub>6</sub>) of compound 5r**

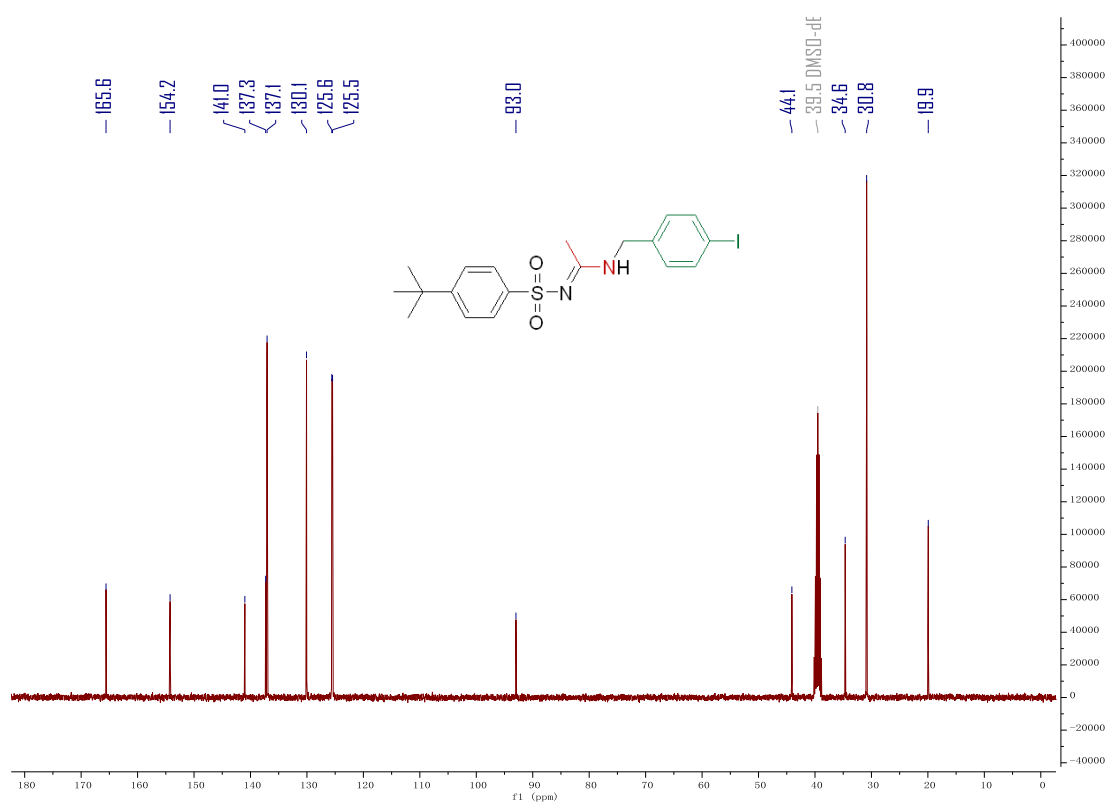

<sup>1</sup>H NMR (400 MHz, Chloroform-*d*) of compound **5s**

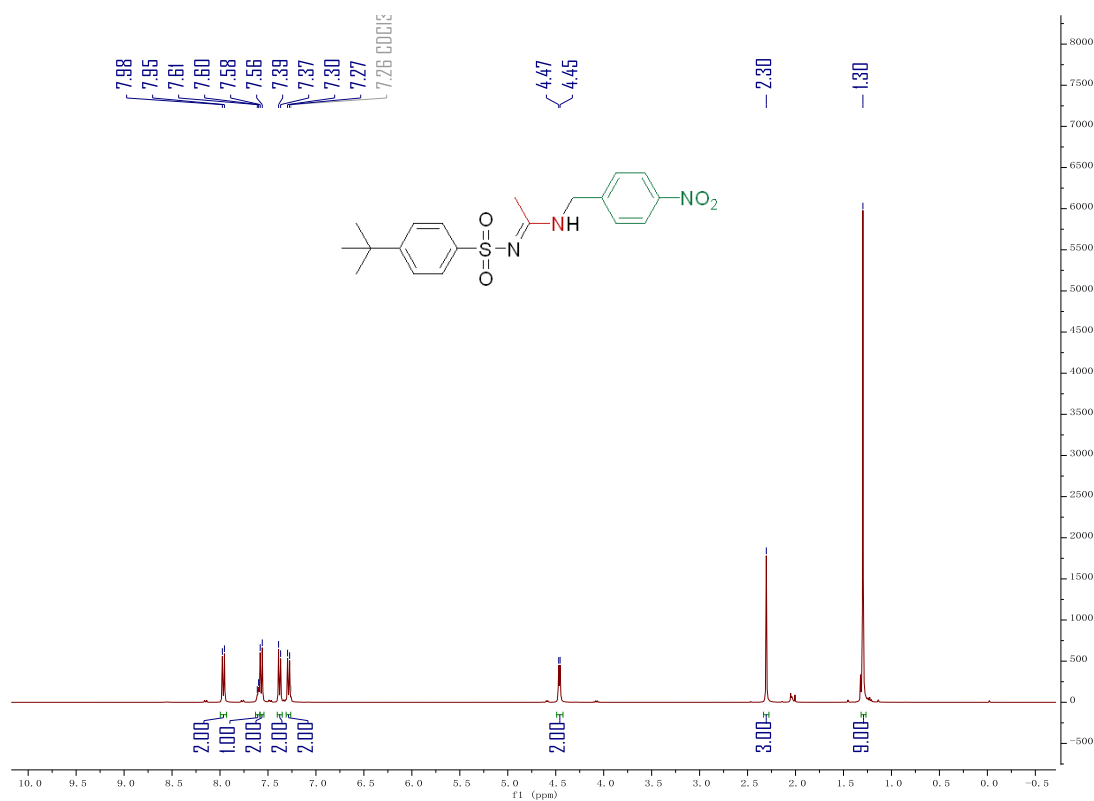

<sup>13</sup>C NMR (100 MHz, Chloroform-*d*) of compound **5s**

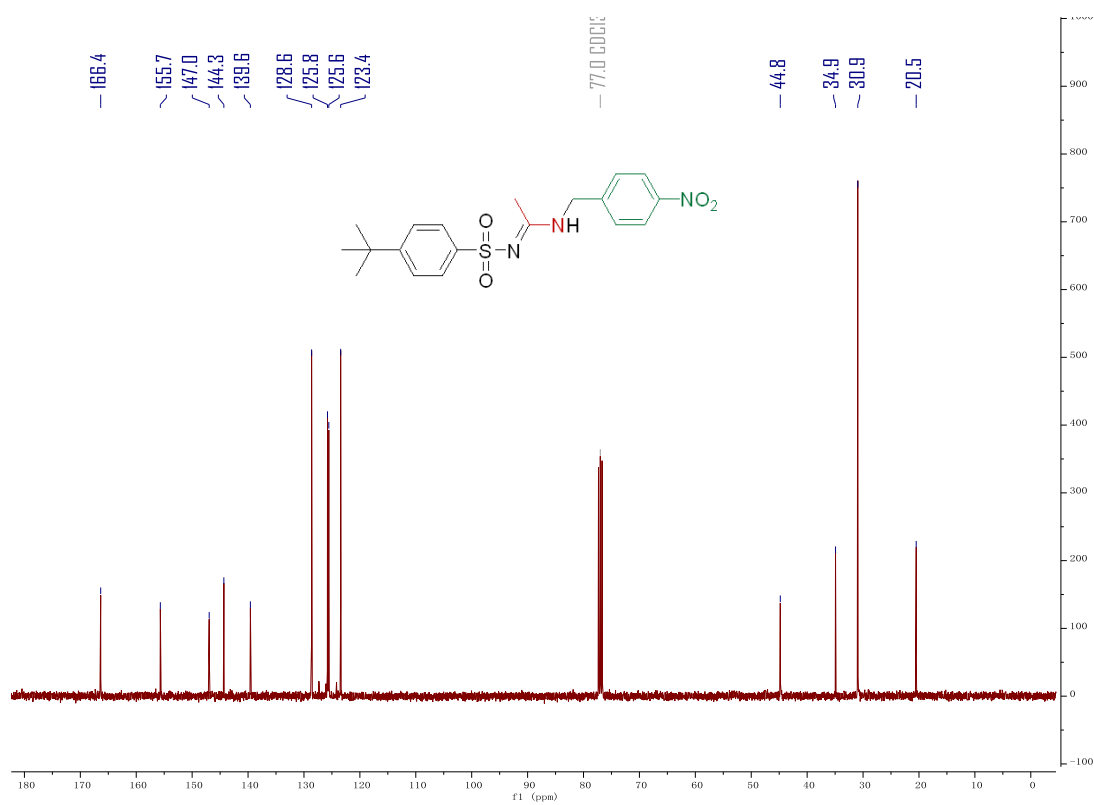

**<sup>1</sup>H NMR (400 MHz, DMSO-*d*<sub>6</sub>) of compound 5t**

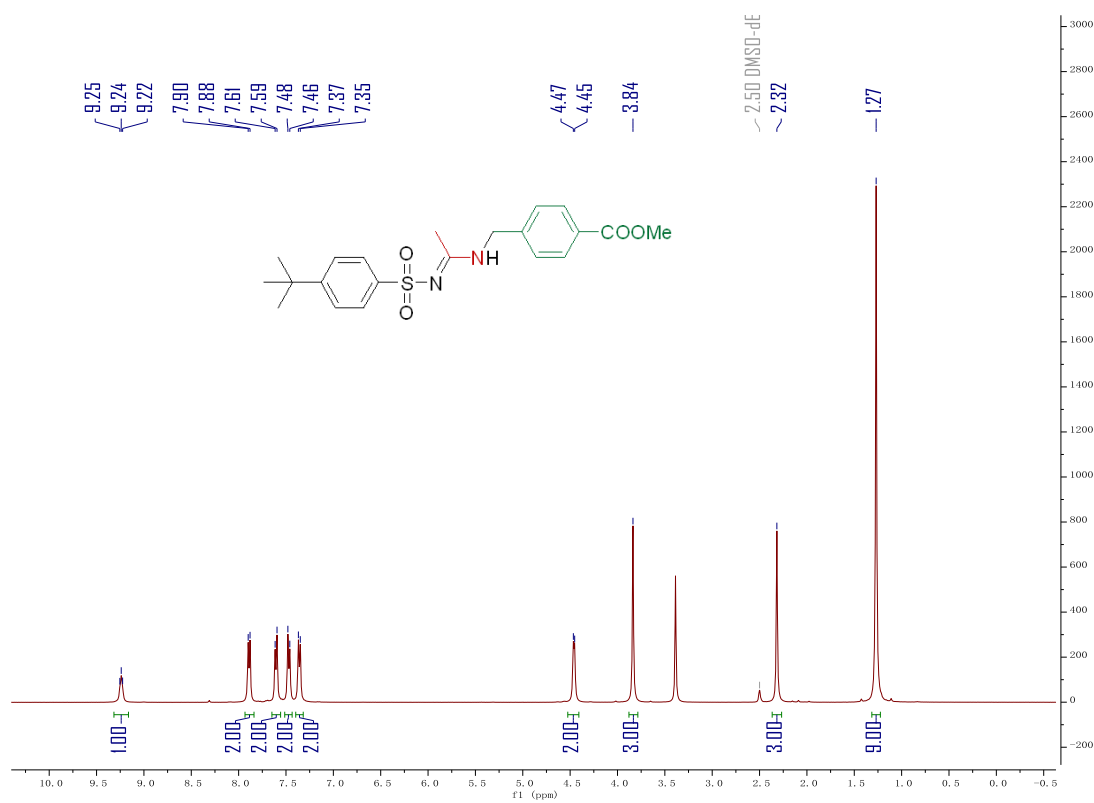

**<sup>13</sup>C NMR (100 MHz, DMSO-*d*<sub>6</sub>) of compound 5t**

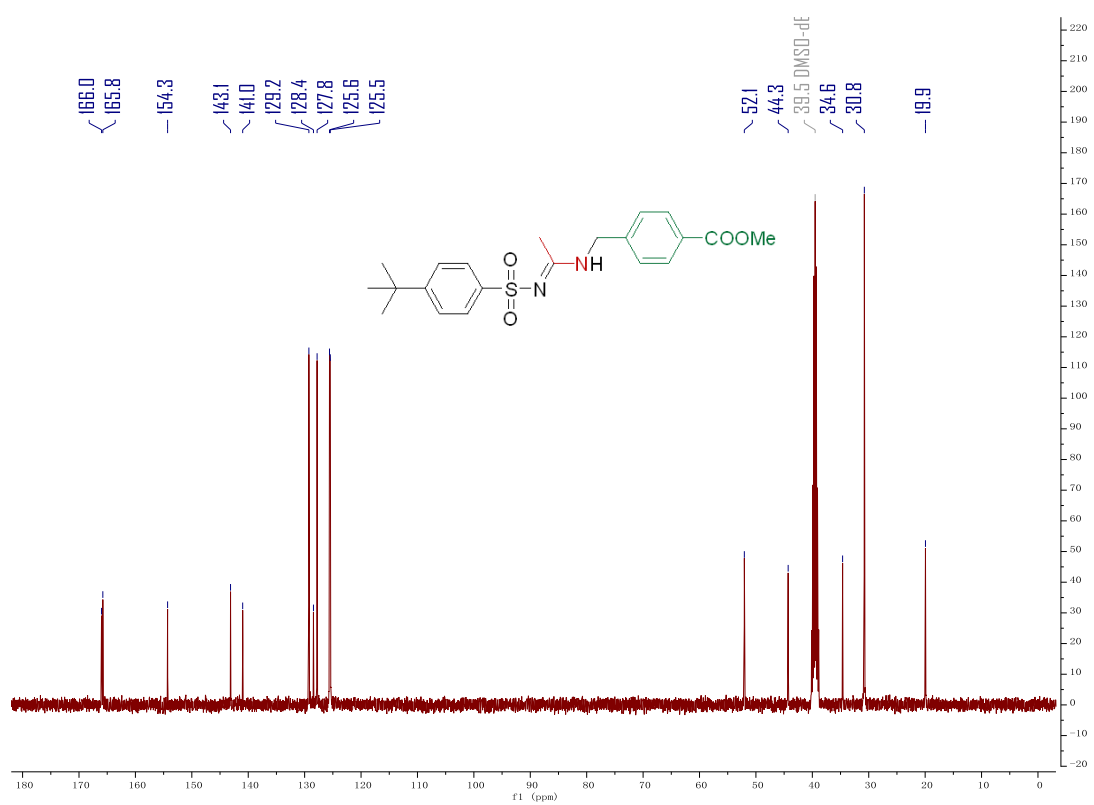

**<sup>1</sup>H NMR (400 MHz, Chloroform-*d*) of compound 5u**

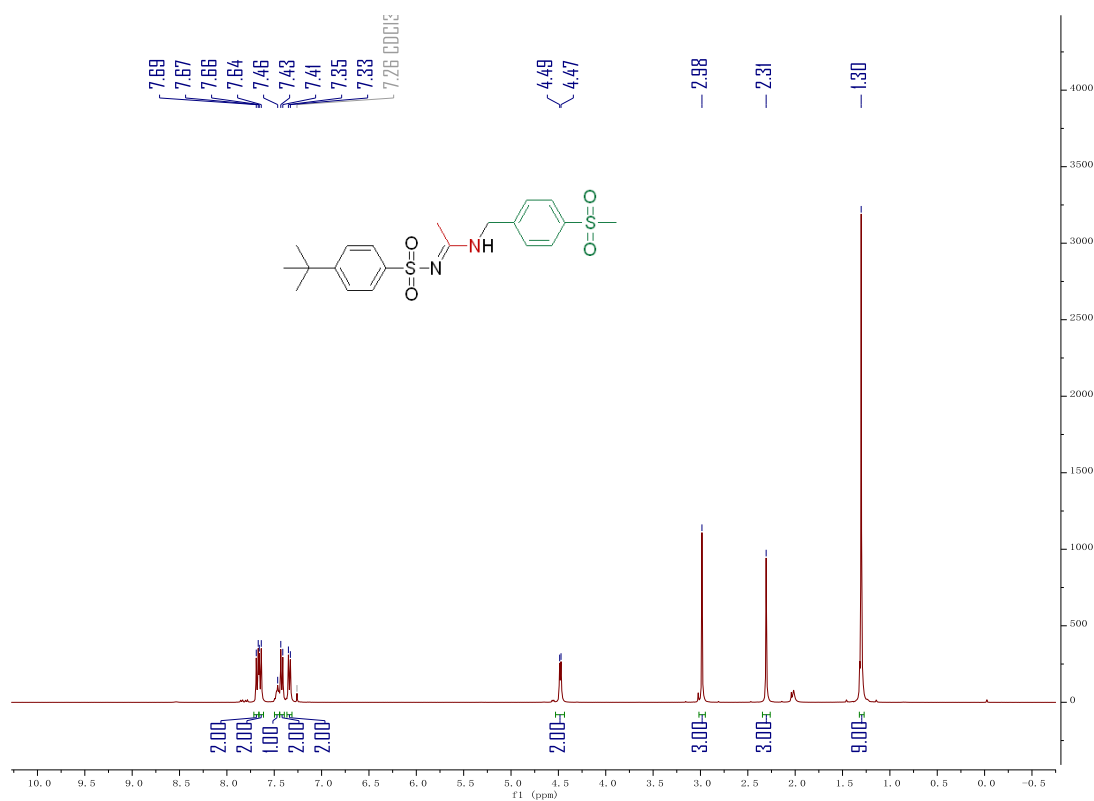

**<sup>13</sup>C NMR (100 MHz, Chloroform-*d*) of compound 5u**

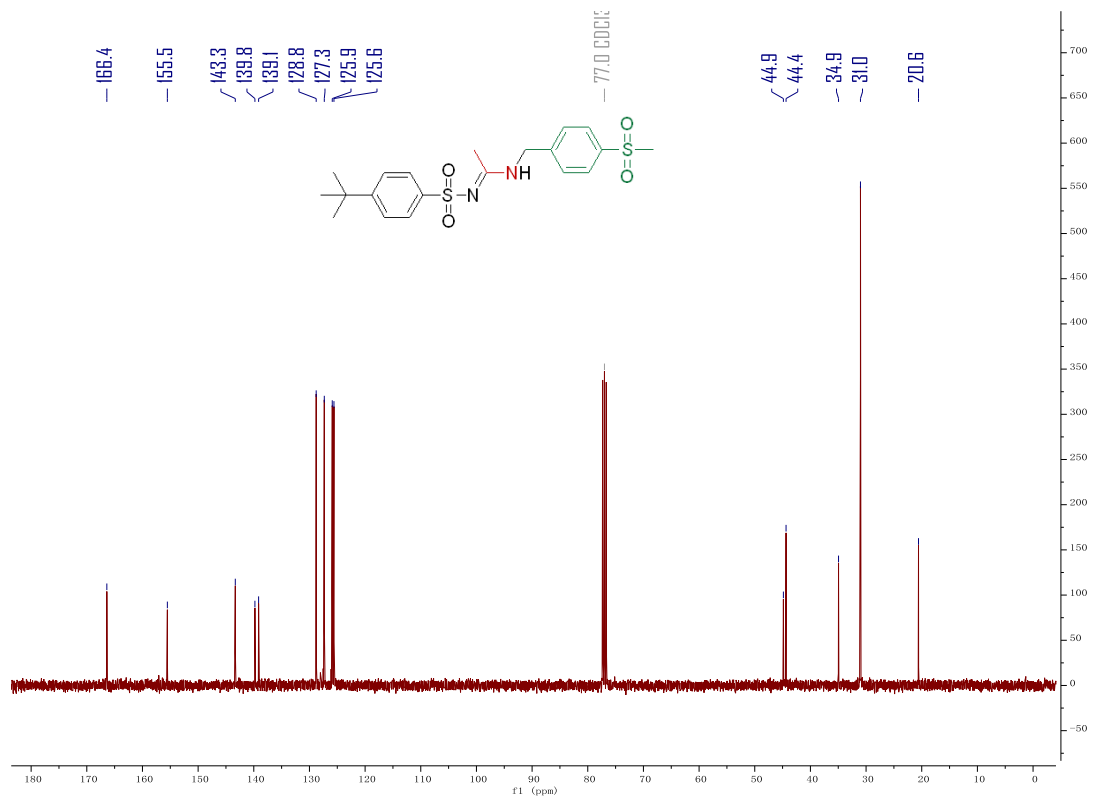



**<sup>1</sup>H NMR (400 MHz, DMSO-*d*<sub>6</sub>) of compound 5v**

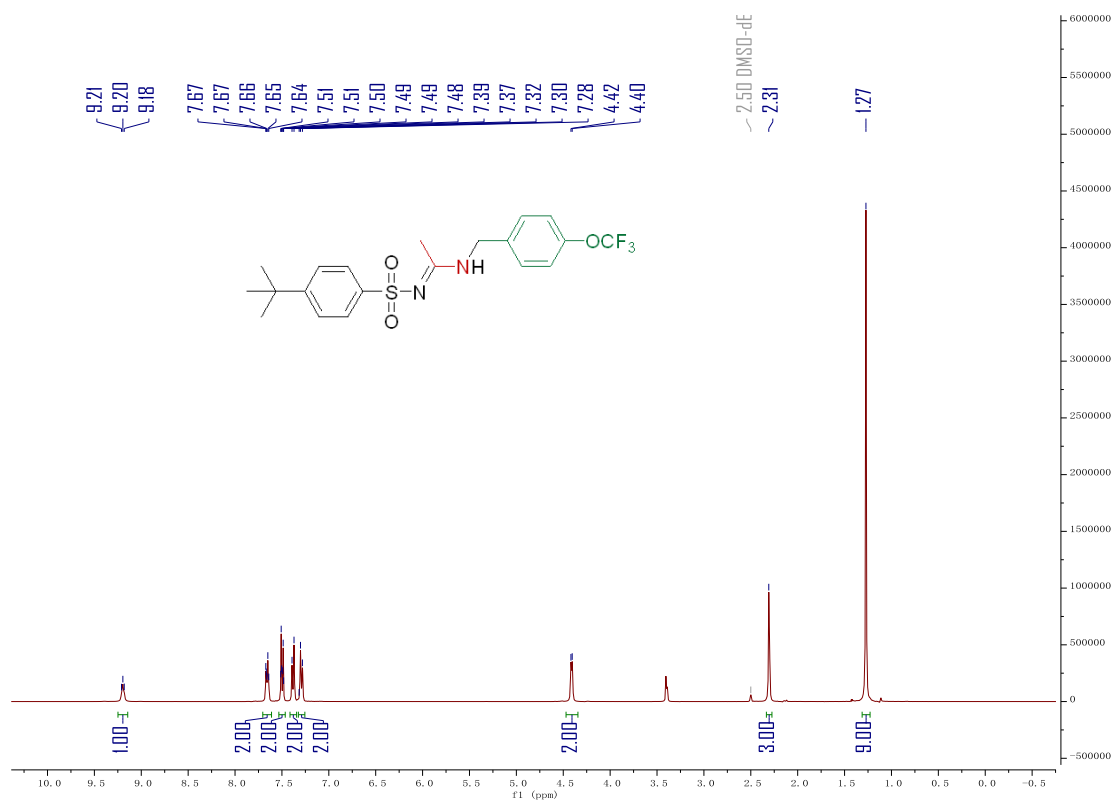

**<sup>13</sup>C NMR (100 MHz, DMSO-*d*<sub>6</sub>) of compound 5v**

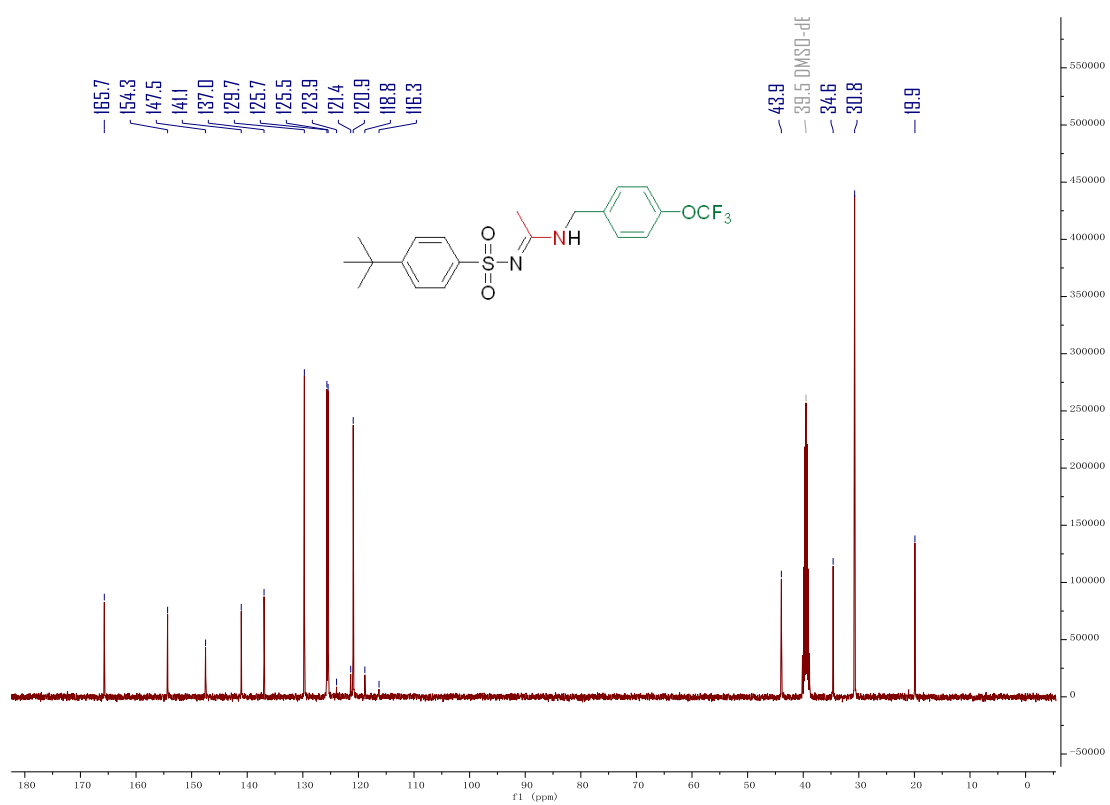

**<sup>19</sup>F NMR (376 MHz, DMSO-*d*<sub>6</sub>) of compound 5v**

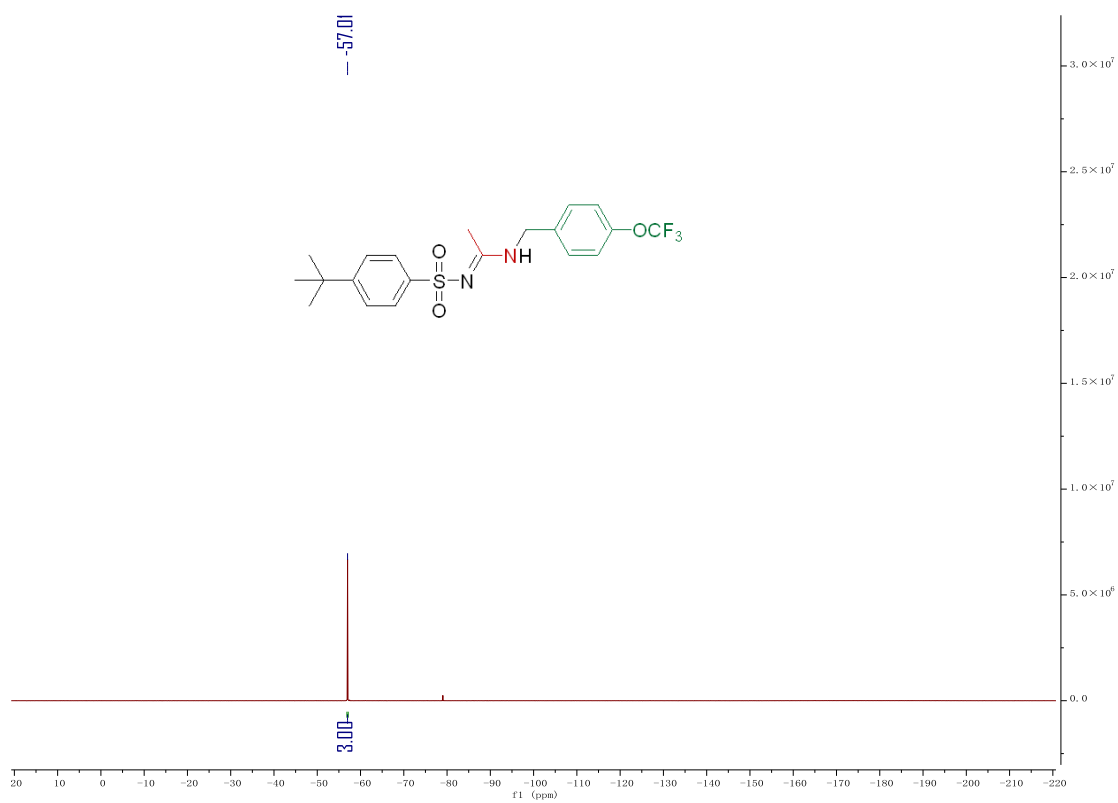

<sup>1</sup>H NMR (400 MHz, DMSO-d<sub>6</sub>) of compound **5w**

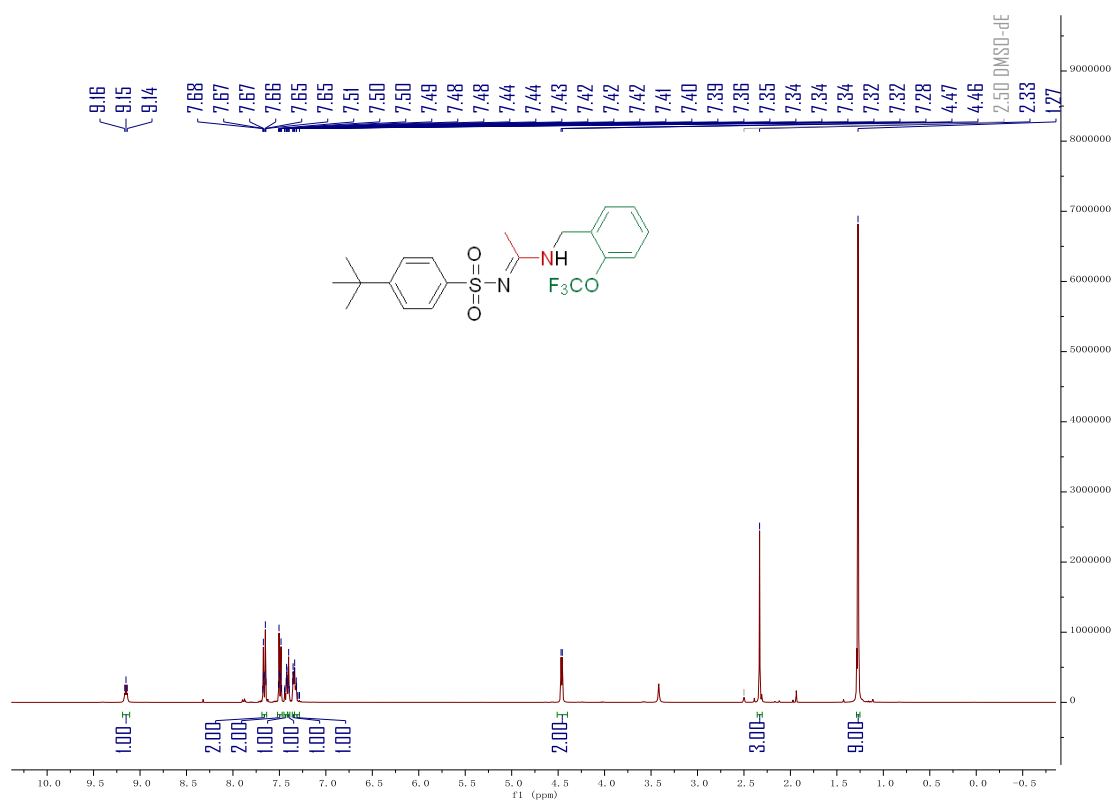

<sup>13</sup>C NMR (100 MHz, DMSO-d<sub>6</sub>) of compound **5w**

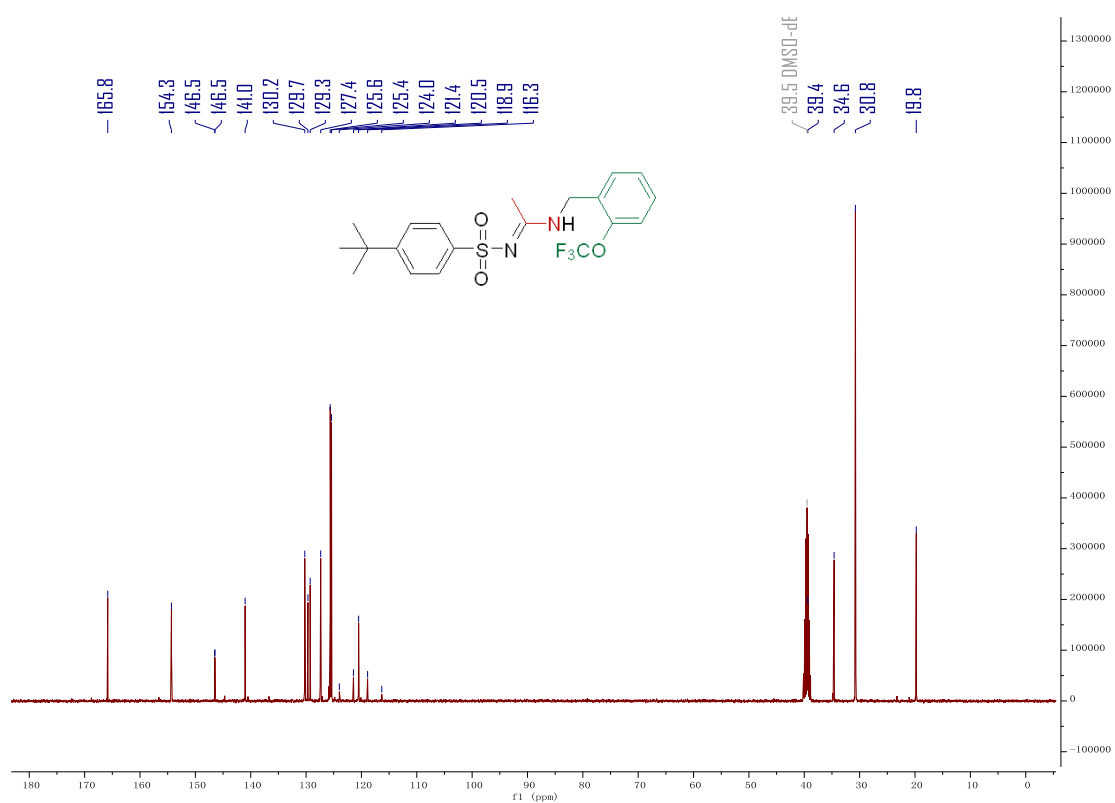

**<sup>19</sup>F NMR (376 MHz, DMSO-*d*<sub>6</sub>) of compound 5w**

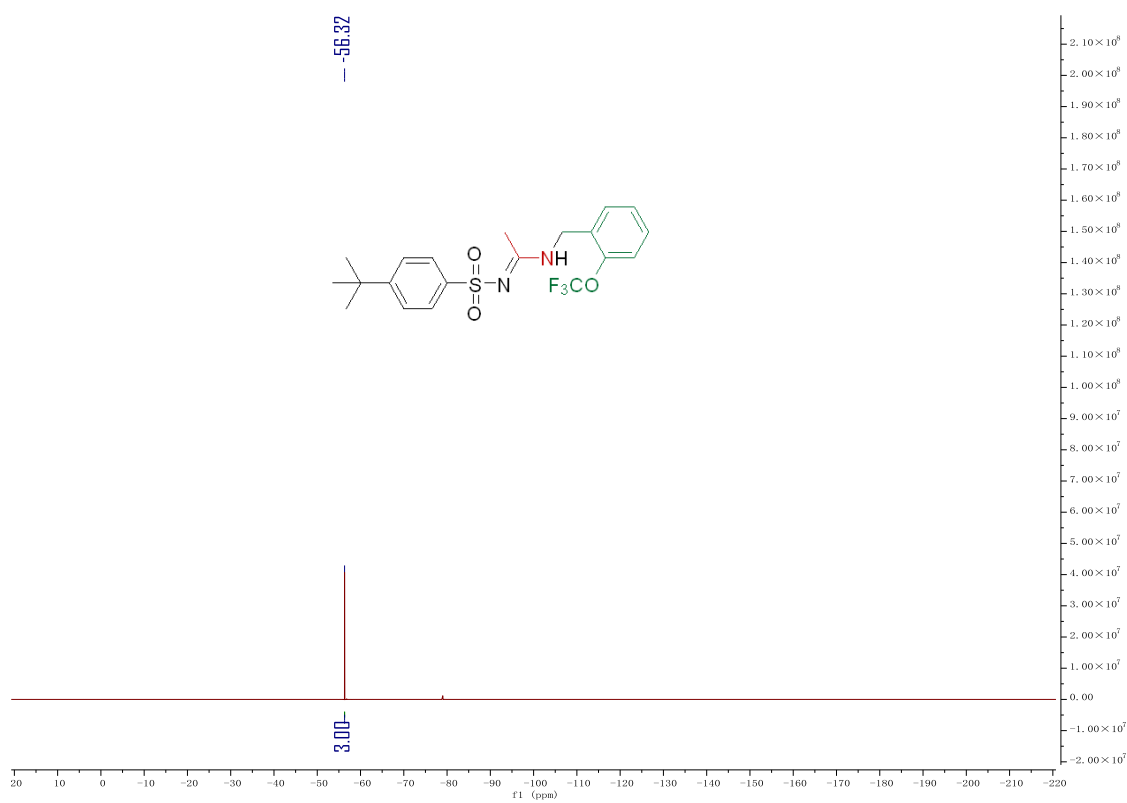

<sup>1</sup>H NMR (400 MHz, DMSO-d<sub>6</sub>) of compound **5x**

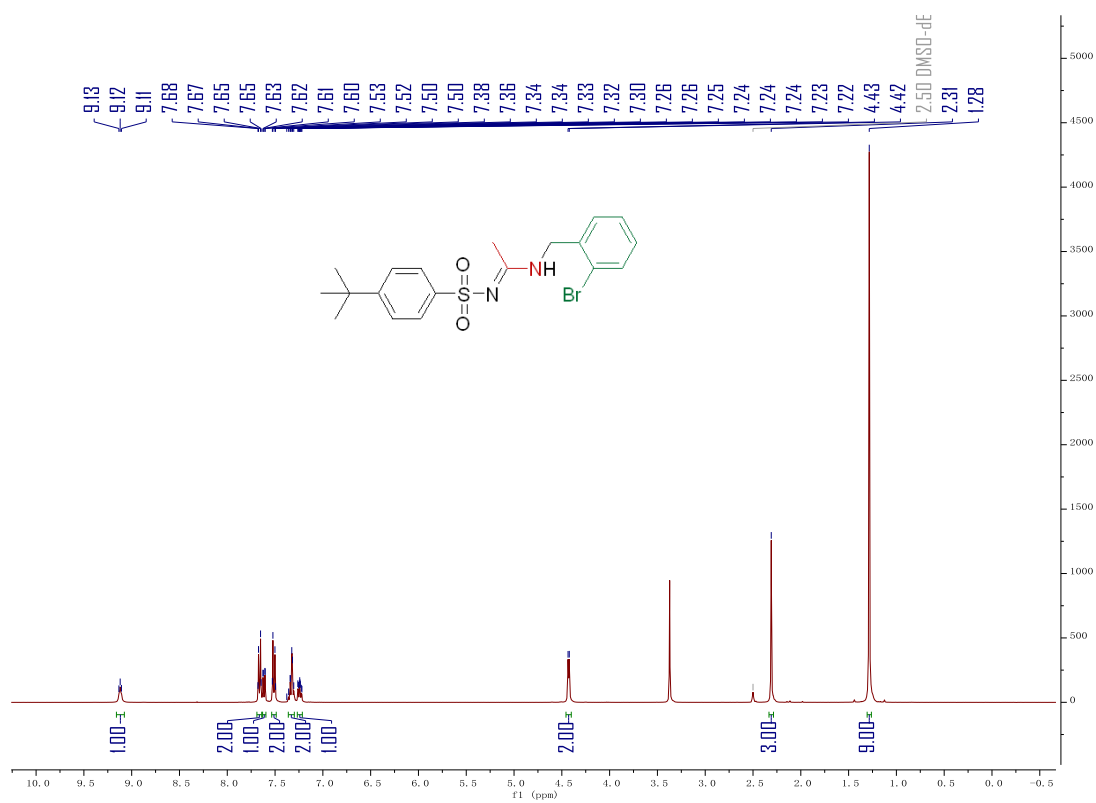

<sup>13</sup>C NMR (100 MHz, DMSO-d<sub>6</sub>) of compound **5x**

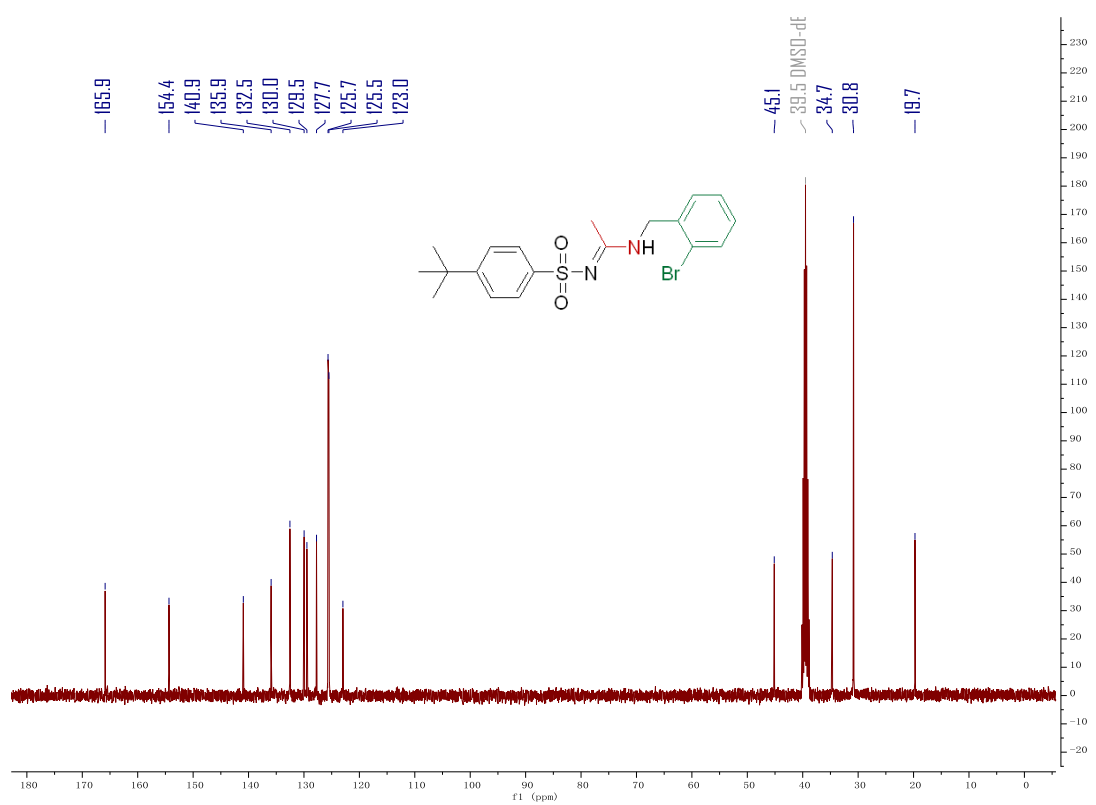

**<sup>1</sup>H NMR (400 MHz, DMSO-*d*<sub>6</sub>) of compound 5y**

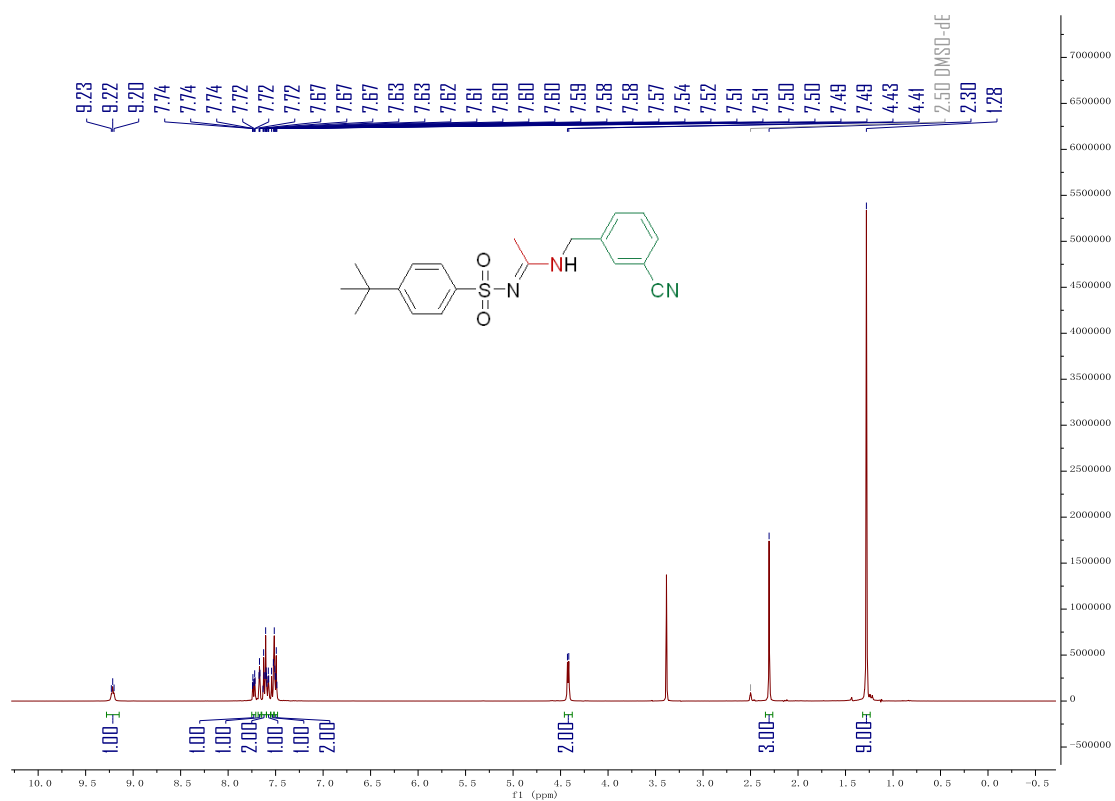

**<sup>13</sup>C NMR (100 MHz, DMSO-*d*<sub>6</sub>) of compound 5y**

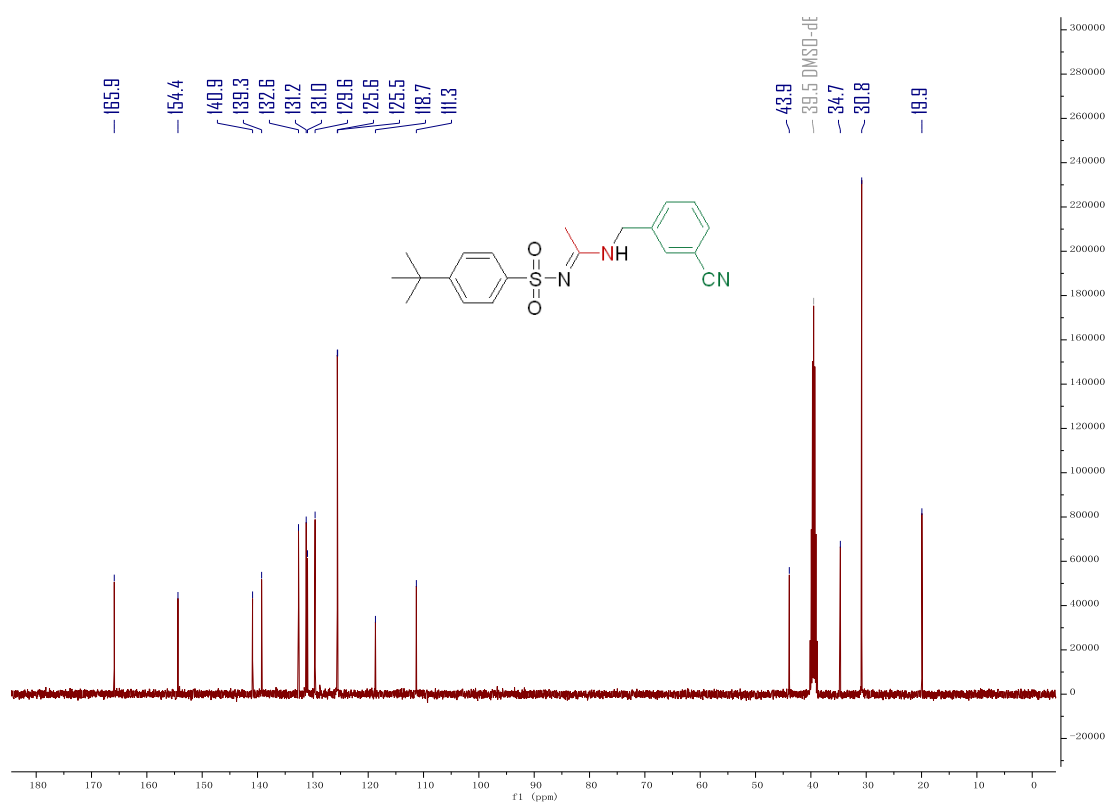

**<sup>1</sup>H NMR (400 MHz, DMSO-*d*<sub>6</sub>) of compound 5z**

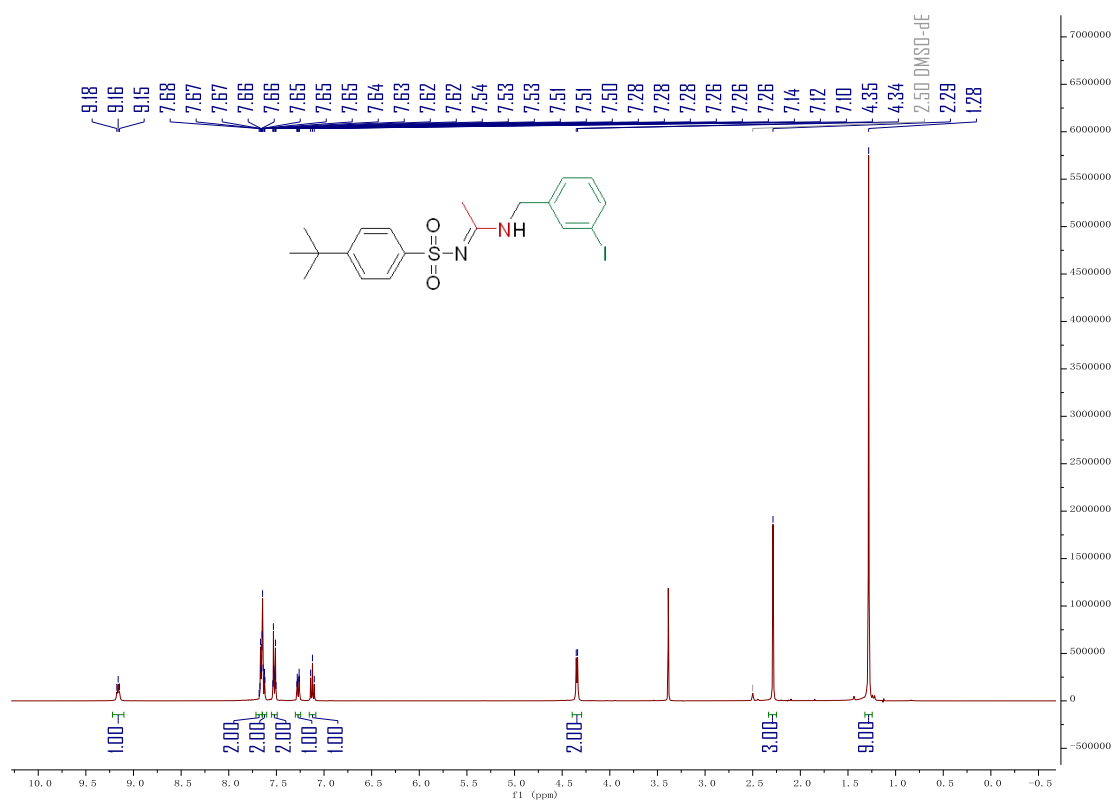

**<sup>13</sup>C NMR (100 MHz, DMSO-*d*<sub>6</sub>) of compound 5z**

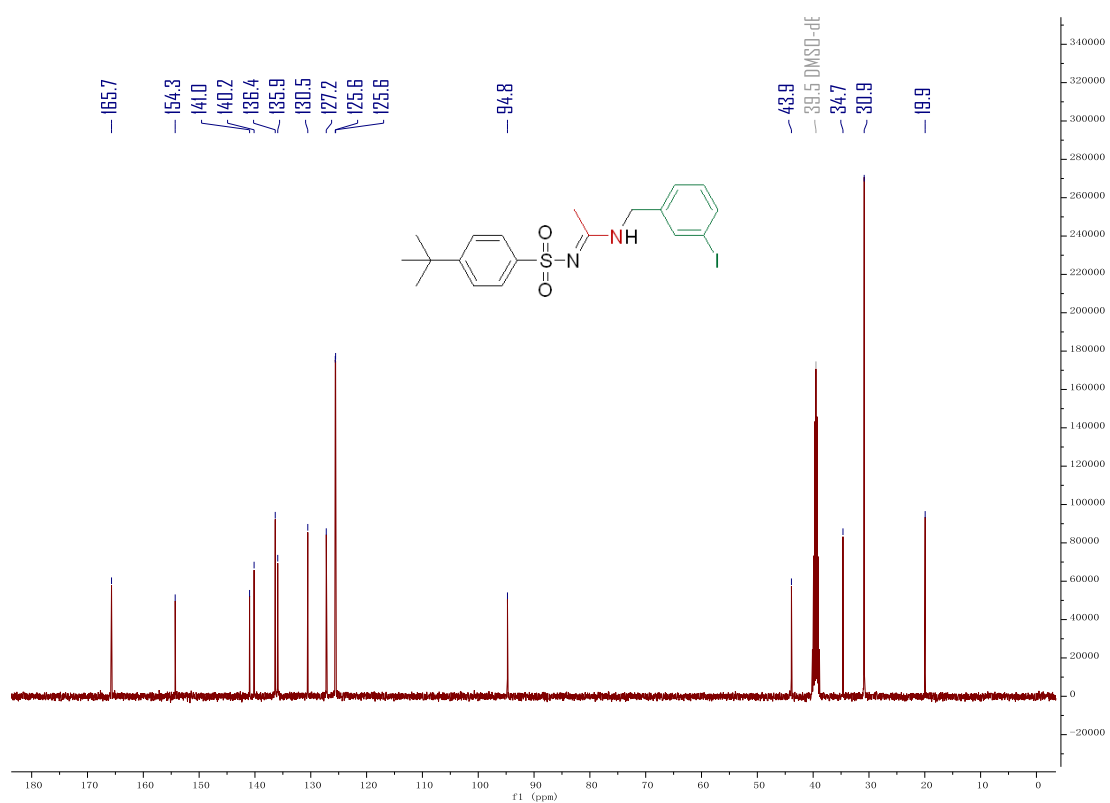





**<sup>1</sup>H NMR (400 MHz, DMSO-*d*<sub>6</sub>) of compound 5ab**

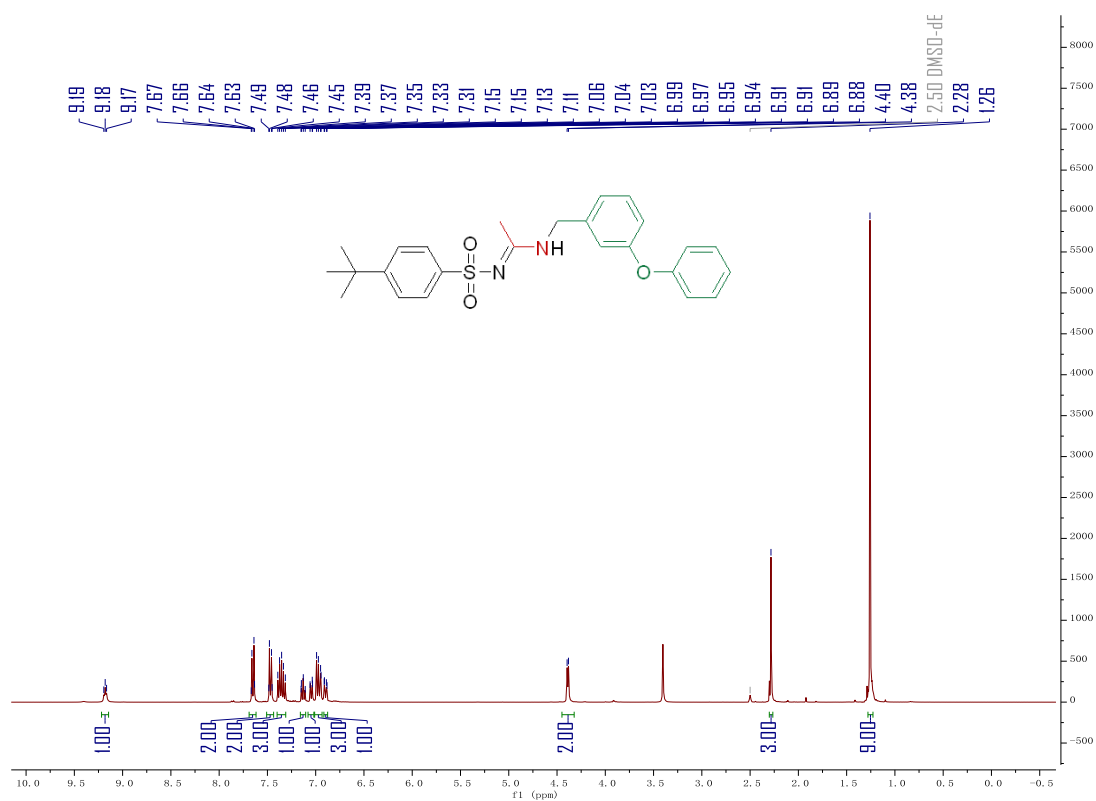

**<sup>13</sup>C NMR (100 MHz, DMSO-*d*<sub>6</sub>) of compound 5ab**

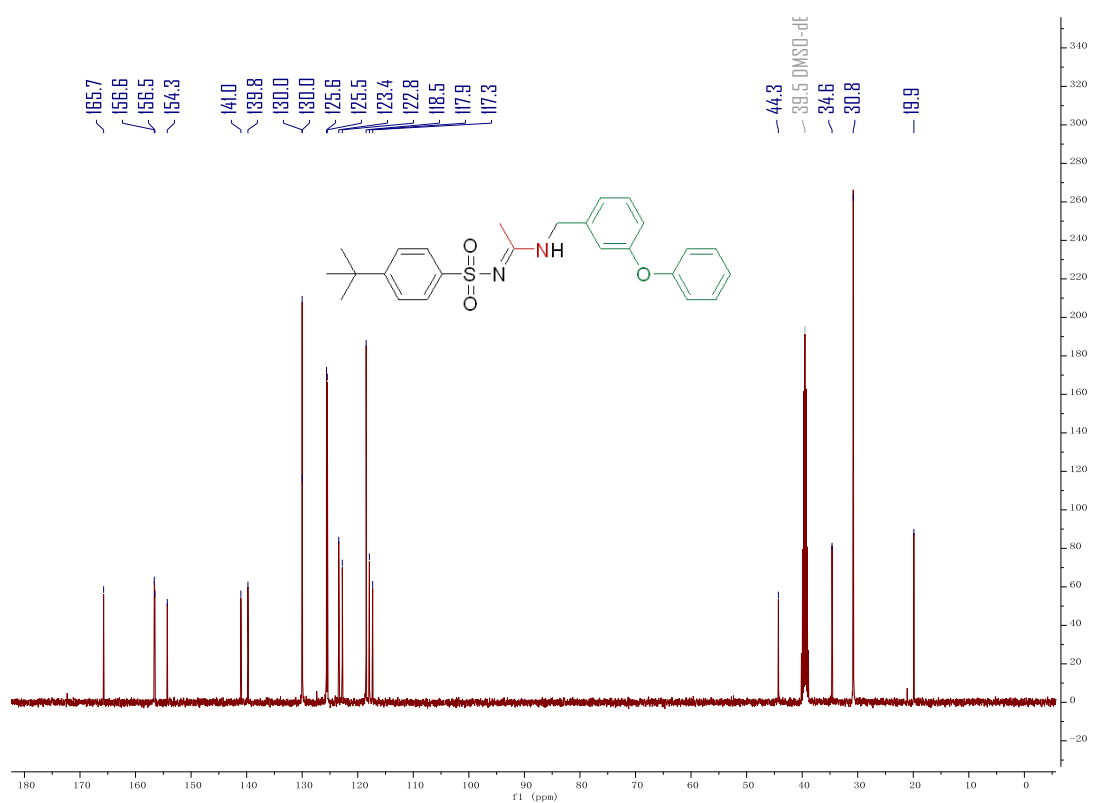





**<sup>1</sup>H NMR (400 MHz, DMSO-*d*<sub>6</sub>) of compound 5ae**

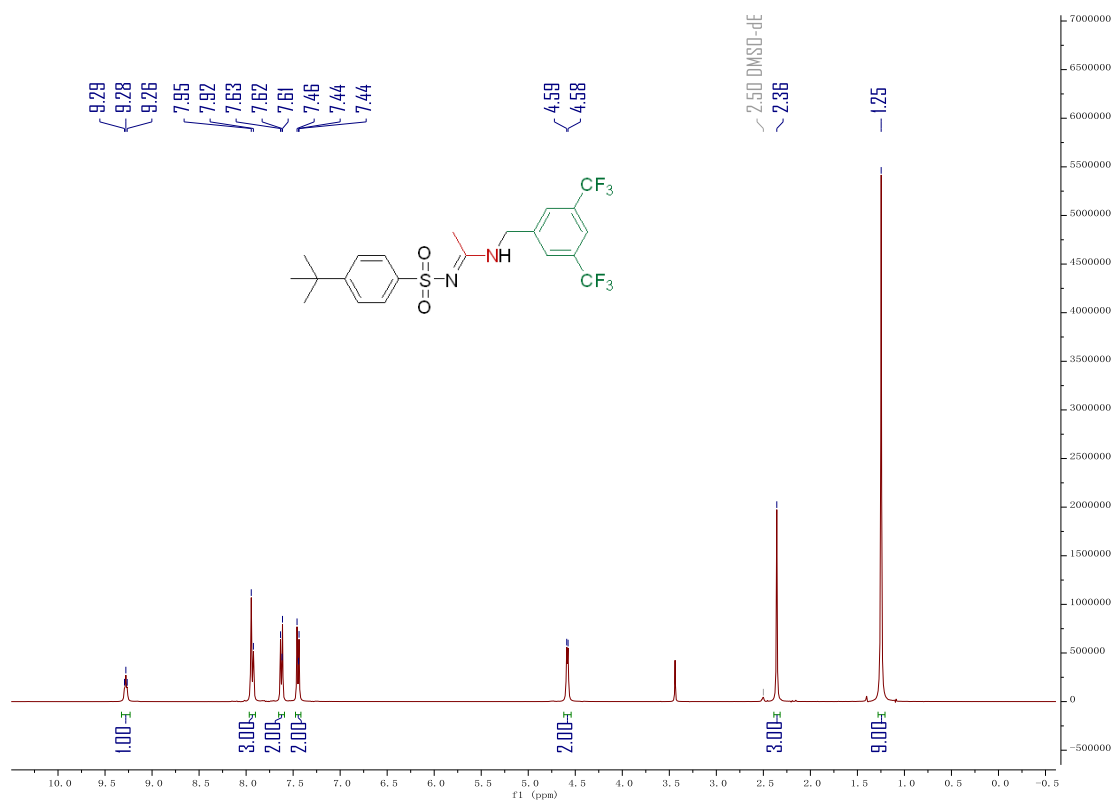

**<sup>13</sup>C NMR (100 MHz, DMSO-*d*<sub>6</sub>) of compound 5ae**

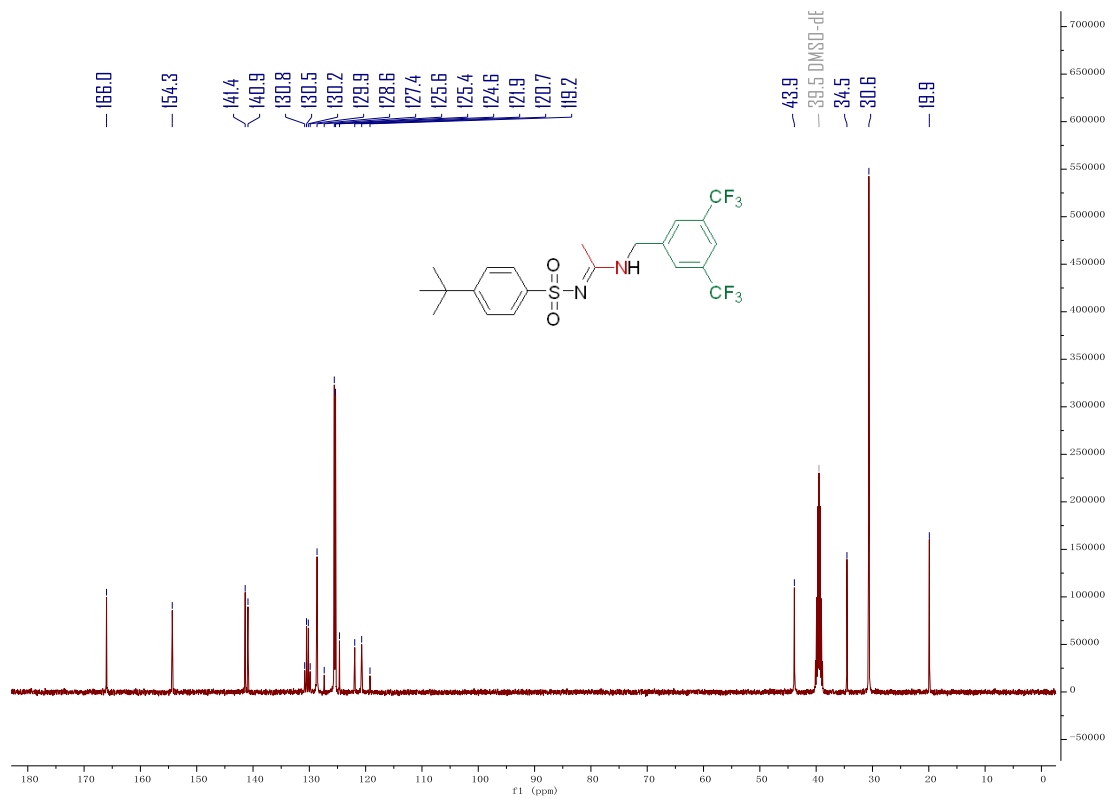

<sup>19</sup>F NMR (376 MHz, DMSO-*d*<sub>6</sub>) of compound **5ae**

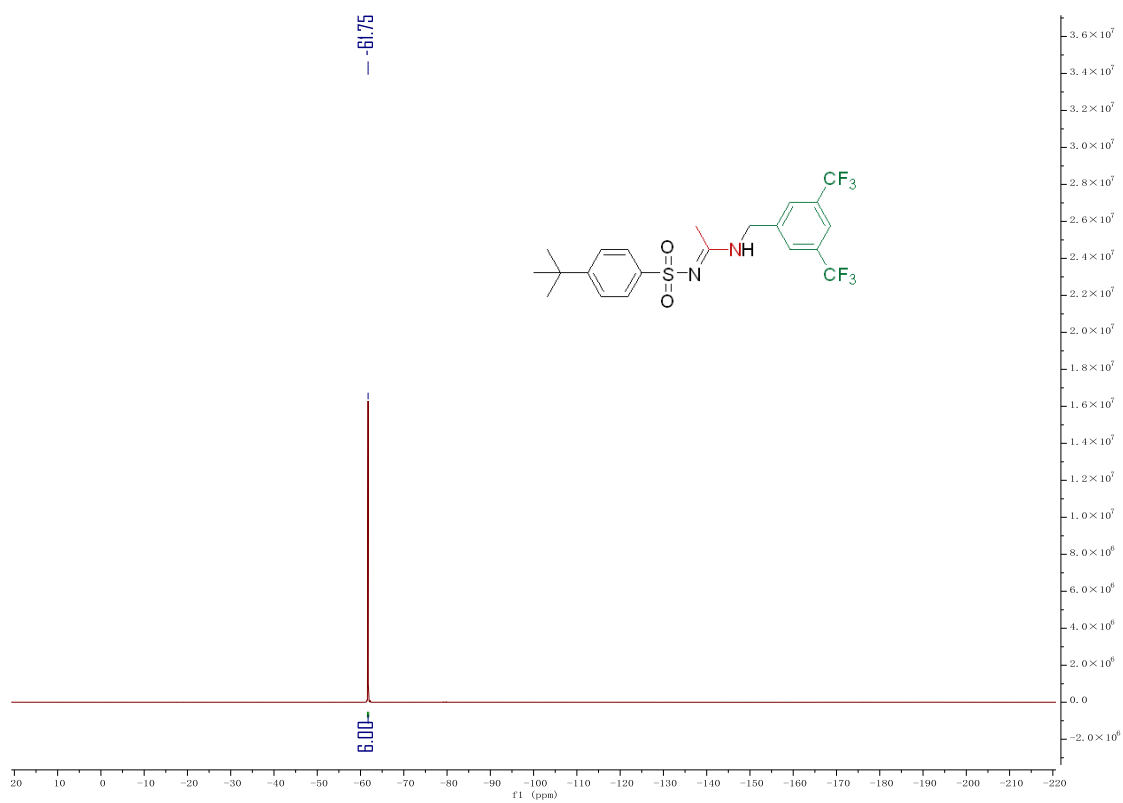

**<sup>1</sup>H NMR (400 MHz, DMSO-*d*<sub>6</sub>) of compound 5af**

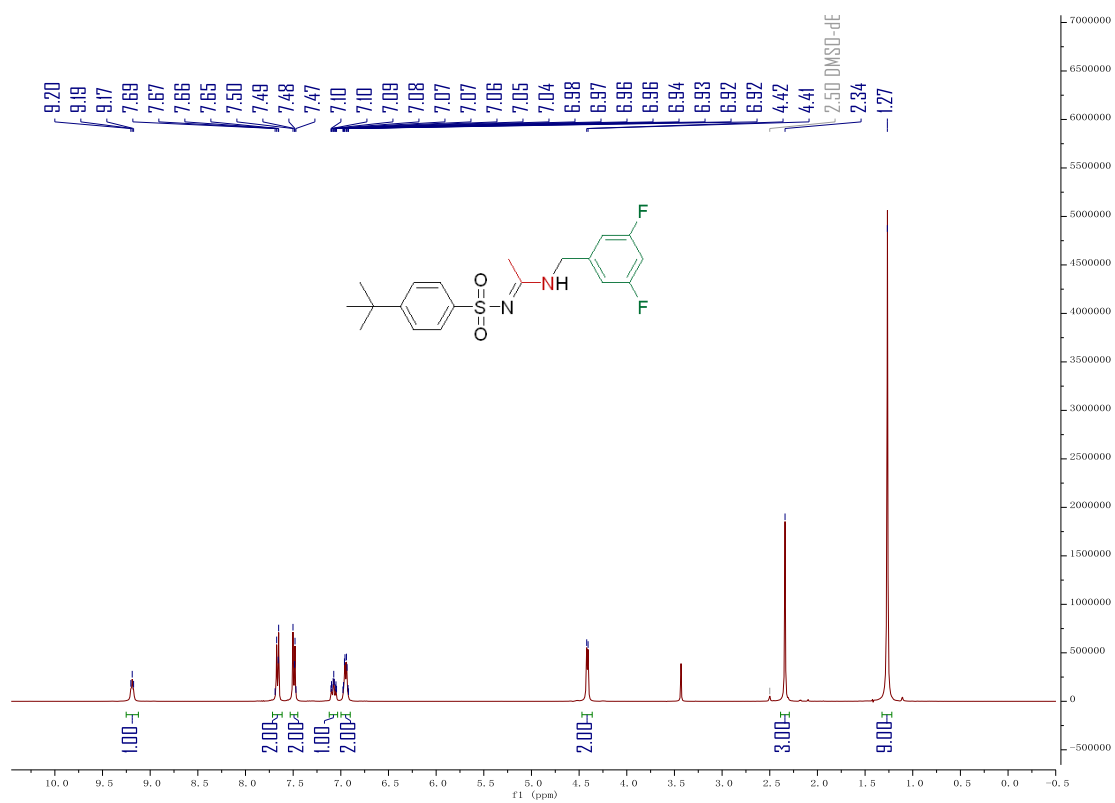

**<sup>13</sup>C NMR (100 MHz, DMSO-*d*<sub>6</sub>) of compound 5af**

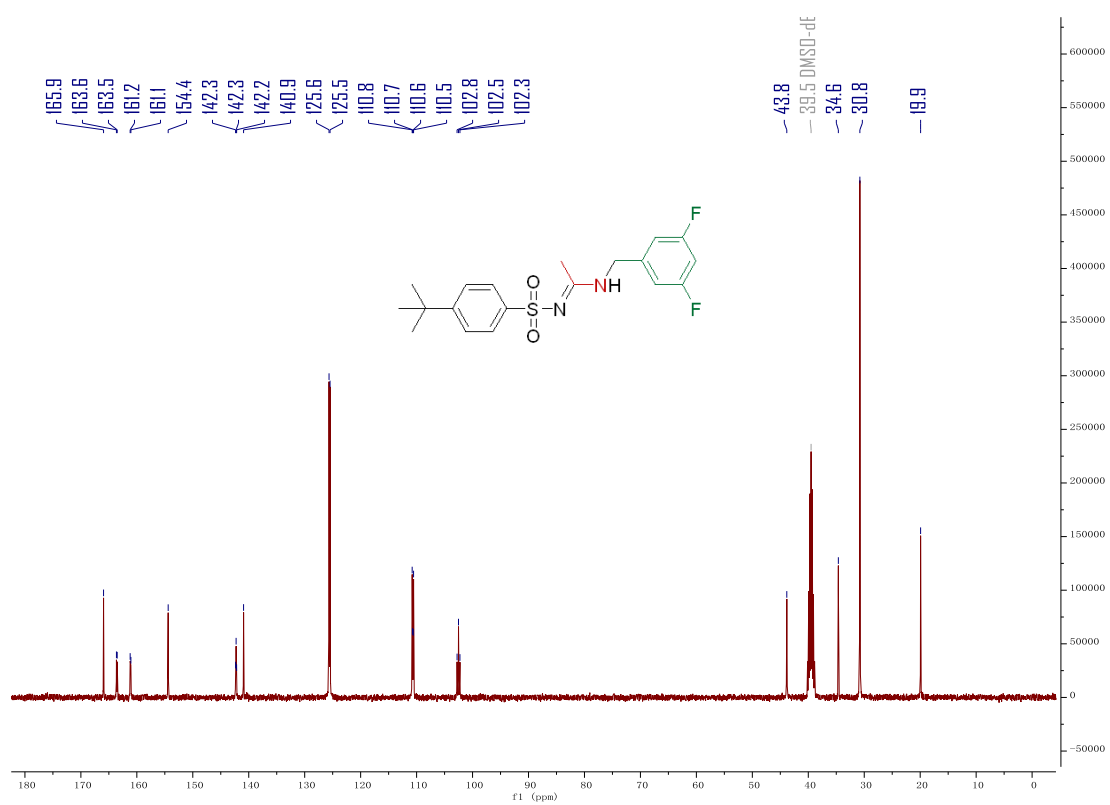

**<sup>19</sup>F NMR (376 MHz, DMSO-*d*<sub>6</sub>) of compound 5af**

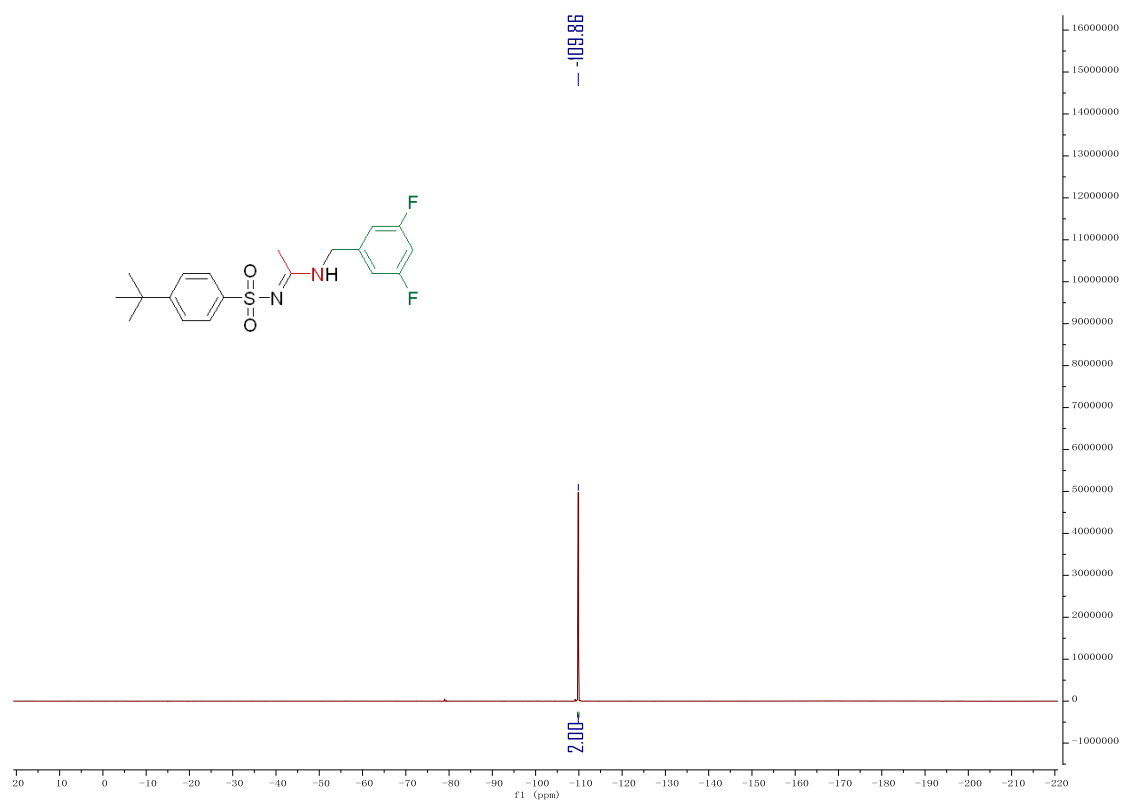

<sup>1</sup>H NMR (400 MHz, DMSO-d<sub>6</sub>) of compound **5ag**

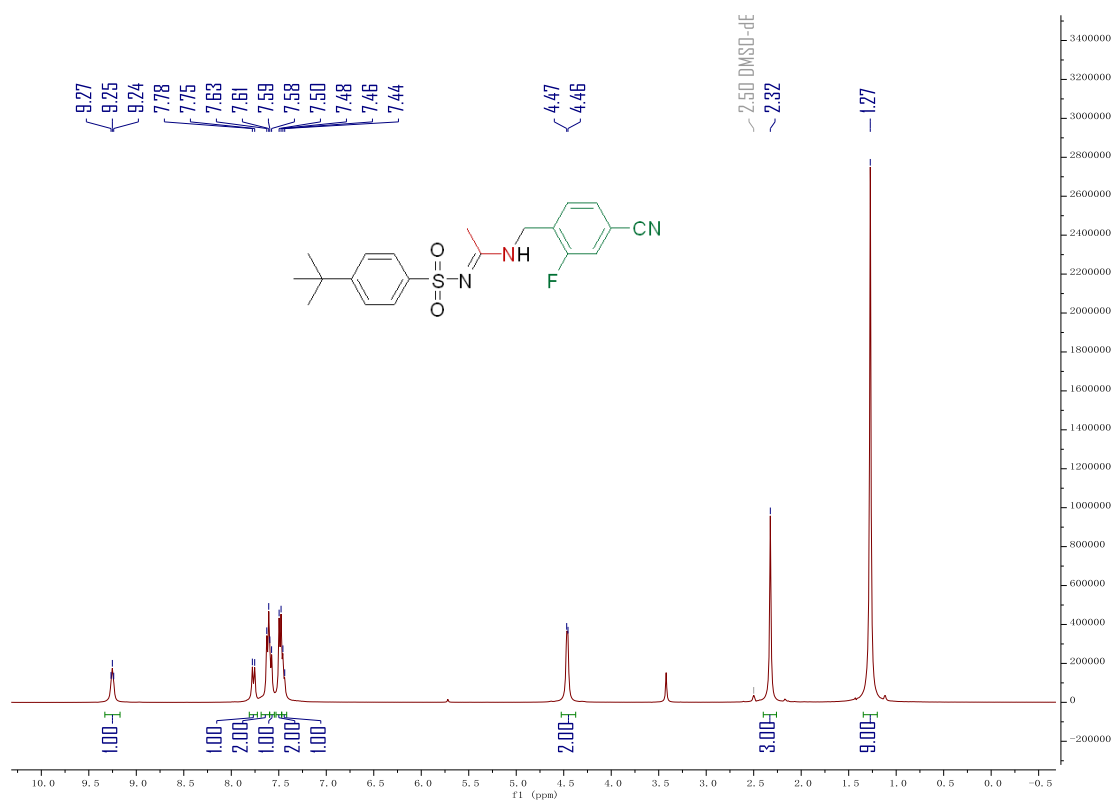

<sup>13</sup>C NMR (100 MHz, DMSO-d<sub>6</sub>) of compound **5ag**

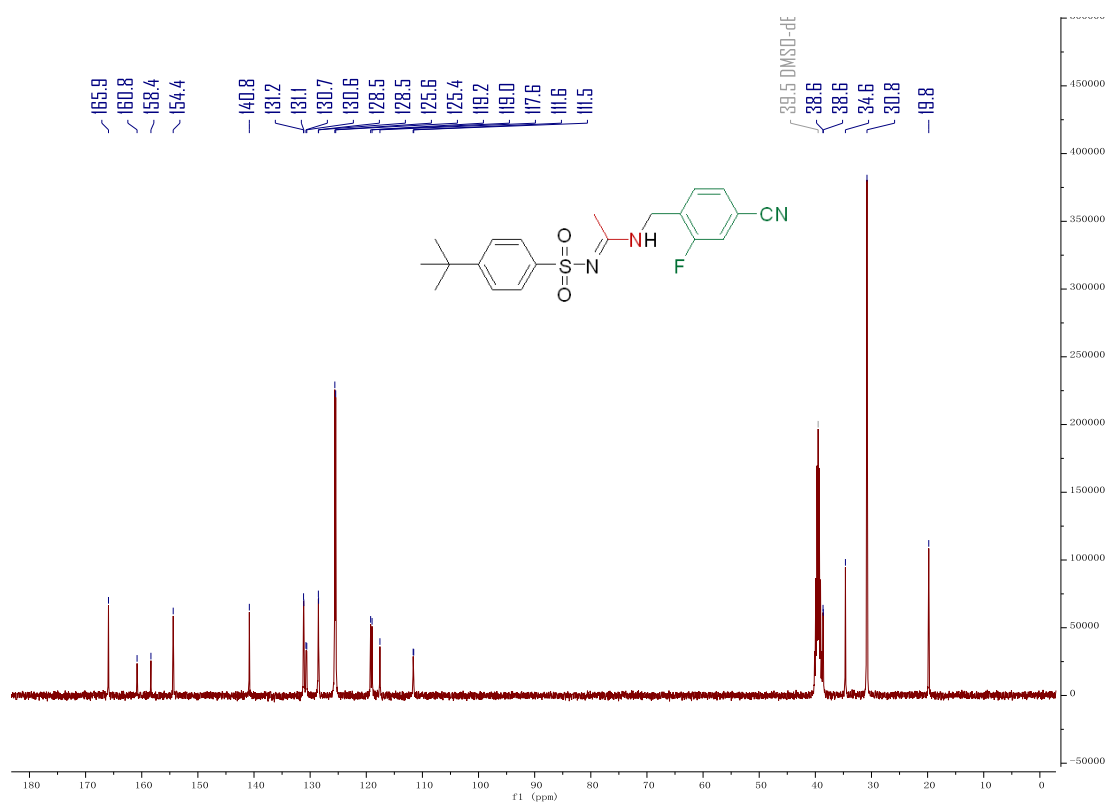



**<sup>19</sup>F NMR (376 MHz, DMSO-*d*<sub>6</sub>) of compound **5ag****

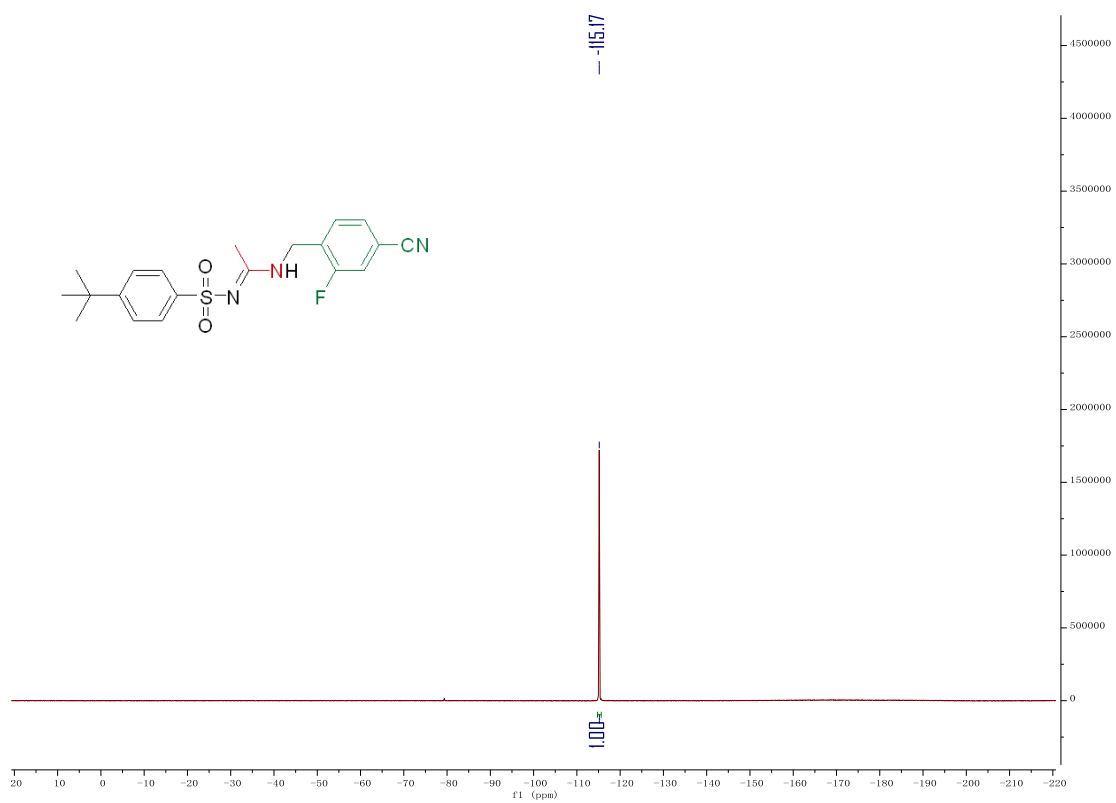

**<sup>1</sup>H NMR (400 MHz, DMSO-*d*<sub>6</sub>) of compound 5ah**

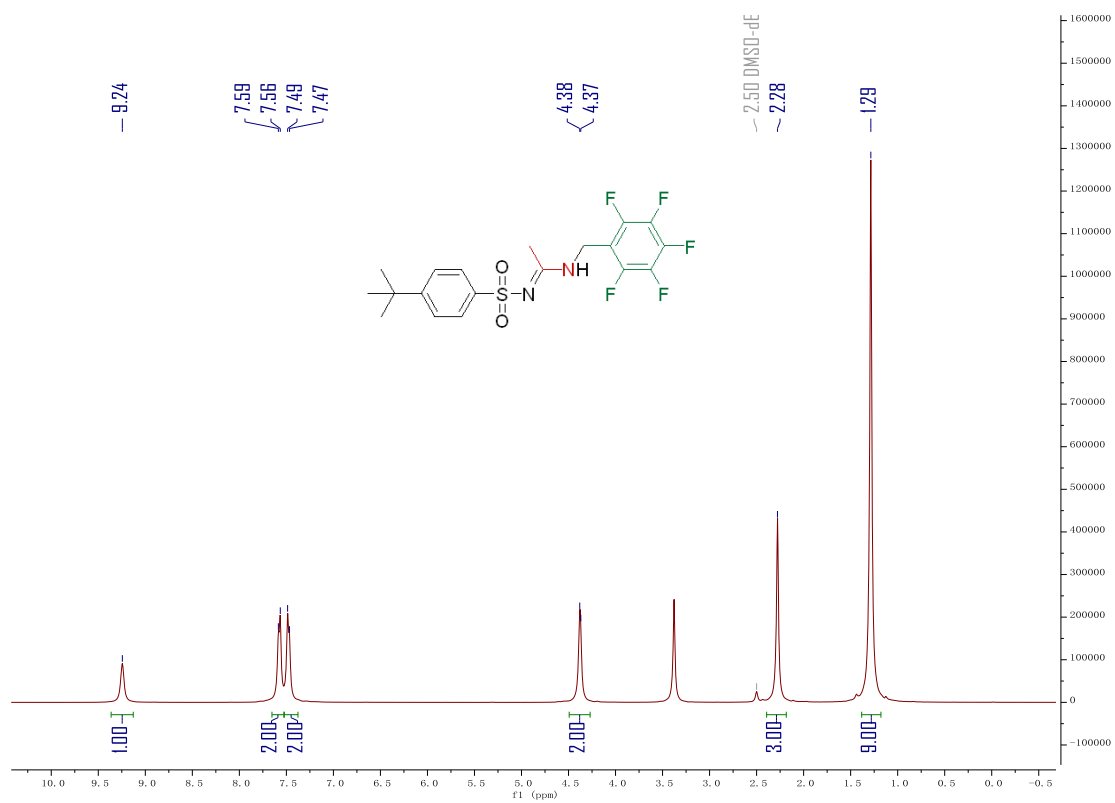

**<sup>13</sup>C NMR (100 MHz, DMSO-*d*<sub>6</sub>) of compound 5ah**

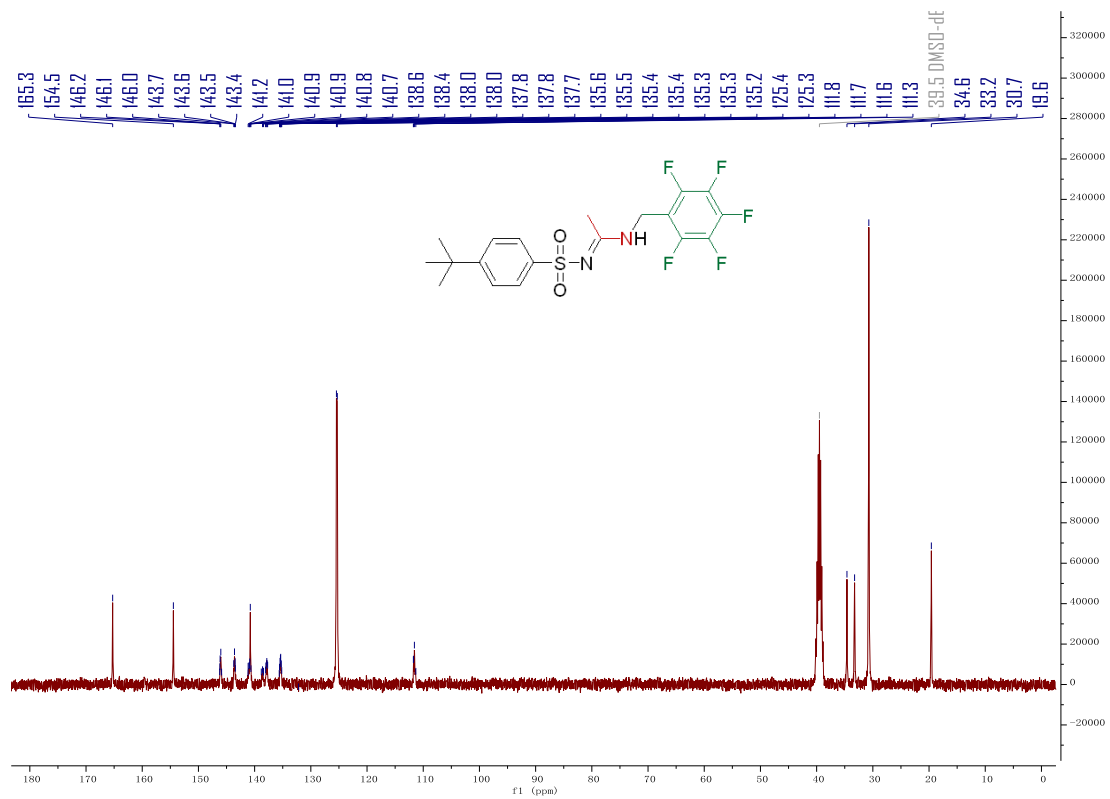

**<sup>19</sup>F NMR (376 MHz, DMSO-*d*<sub>6</sub>) of compound **5ah****

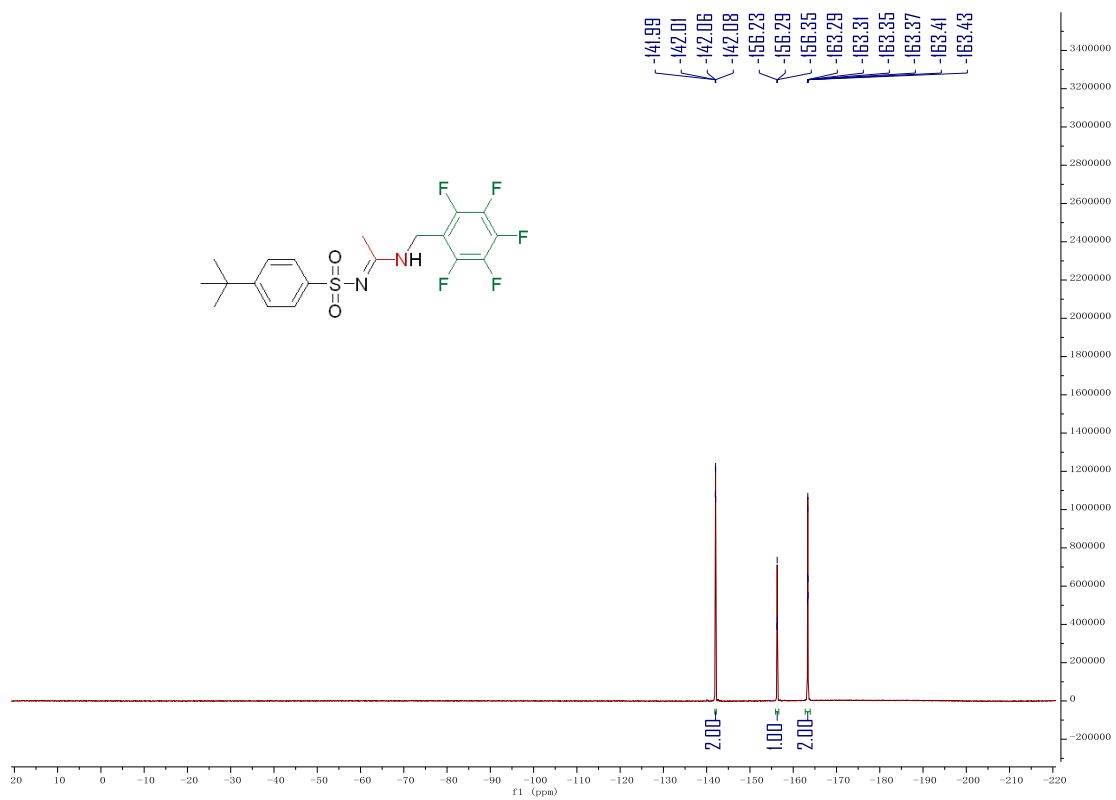

**<sup>1</sup>H NMR (400 MHz, Chloroform-*d*) of compound 5ai**

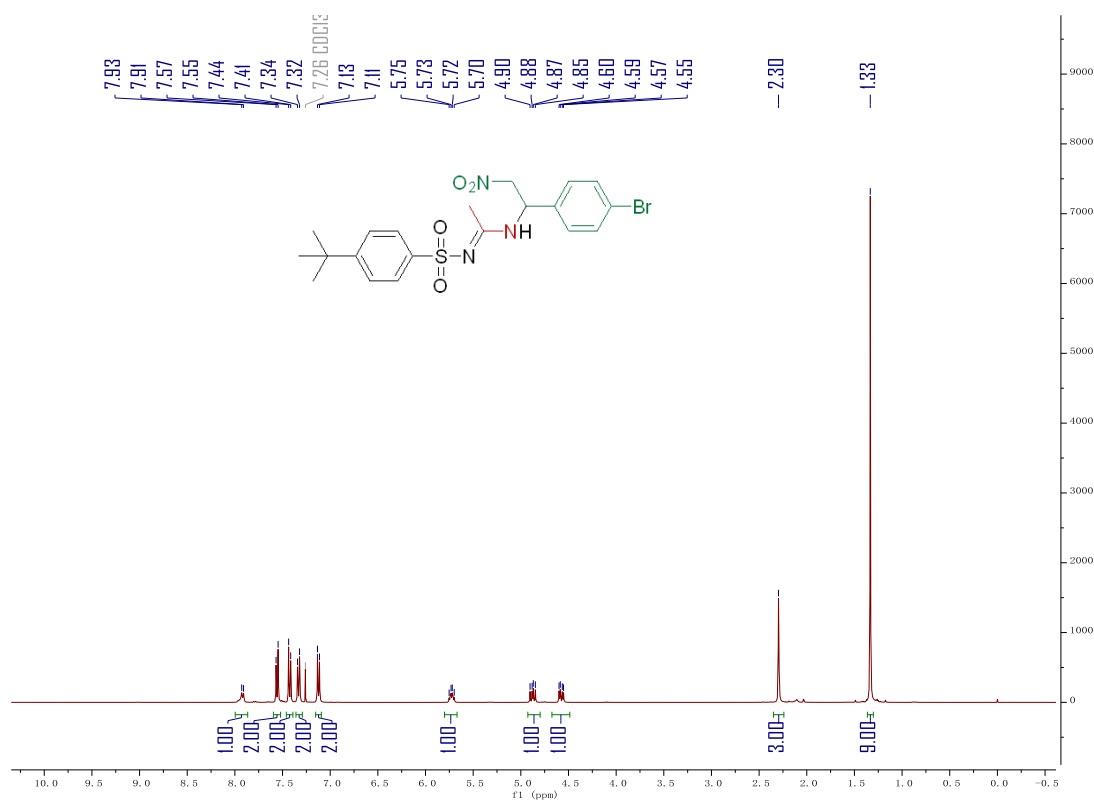

**<sup>13</sup>C NMR (100 MHz, Chloroform-*d*) of compound 5ai**

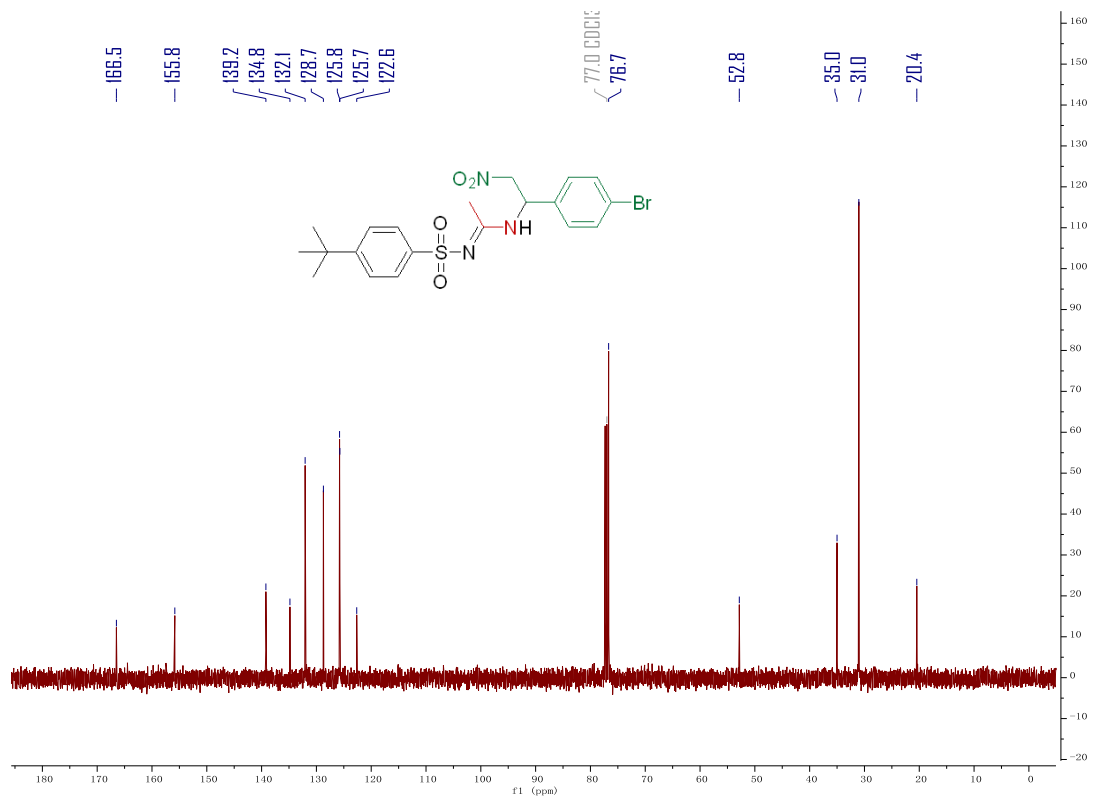

**<sup>1</sup>H NMR (400 MHz, DMSO-*d*<sub>6</sub>) of compound 5aj**

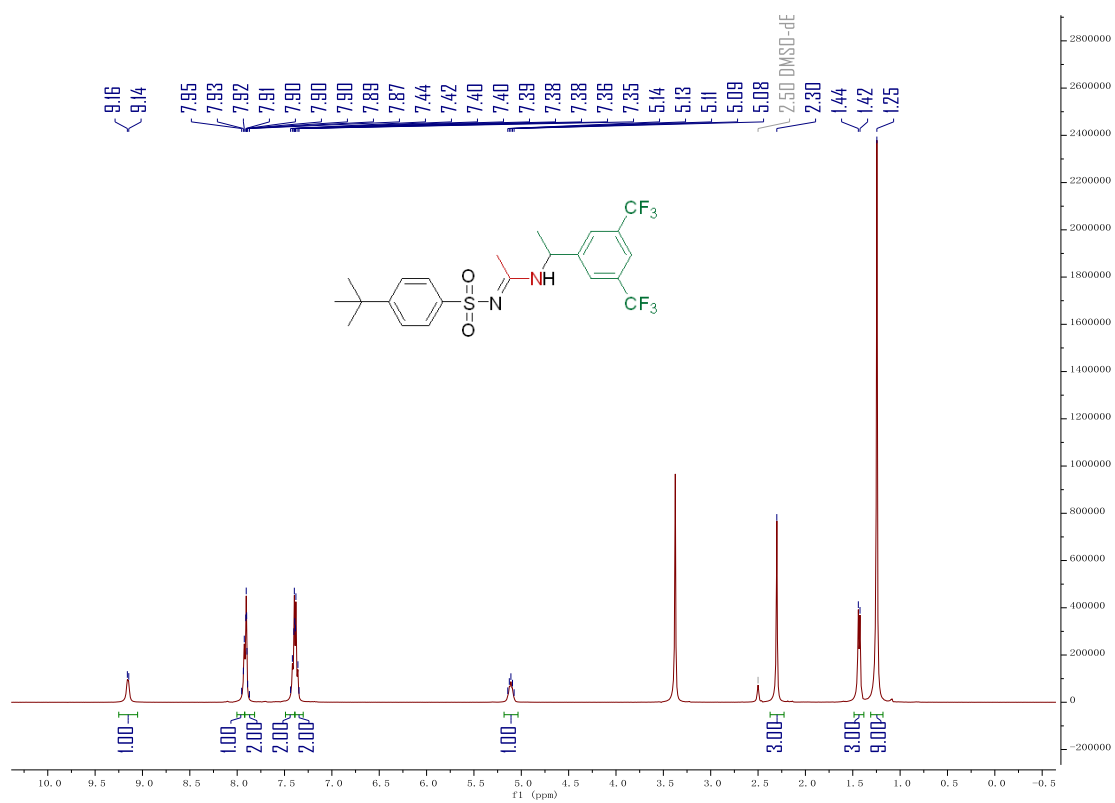

**<sup>13</sup>C NMR (100 MHz, DMSO-*d*<sub>6</sub>) of compound 5aj**

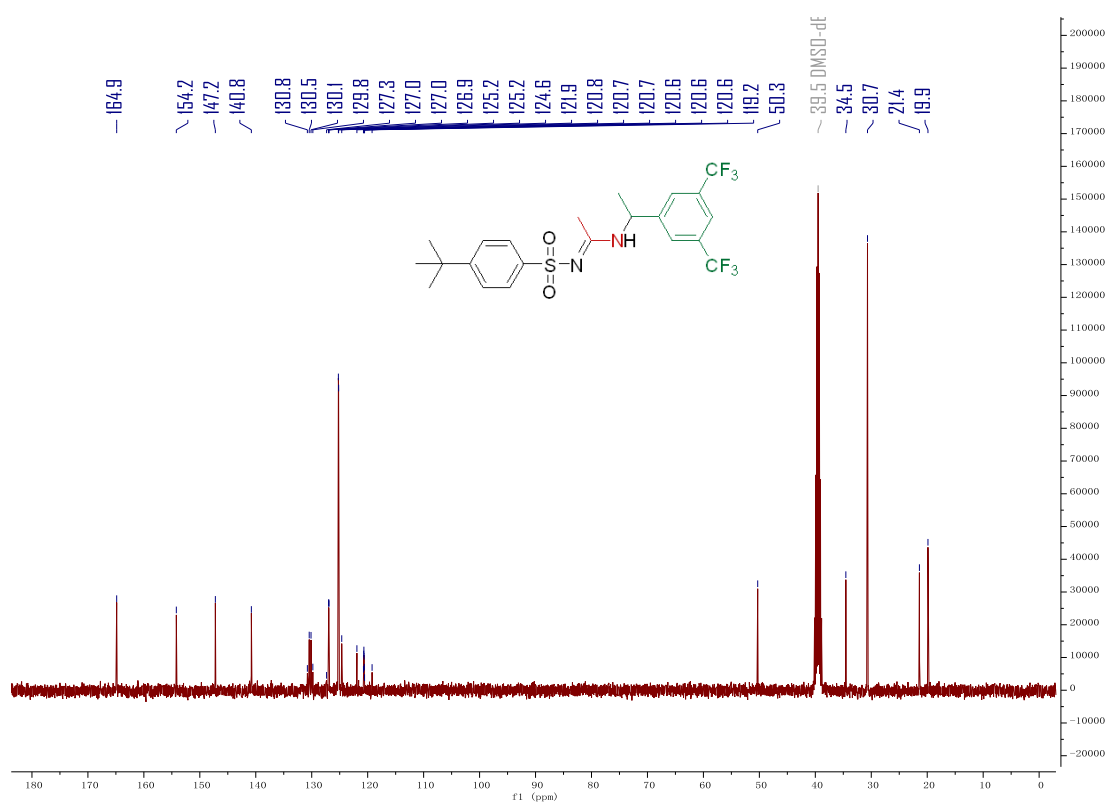

**<sup>19</sup>F NMR (376 MHz, DMSO-*d*<sub>6</sub>) of compound 5aj**

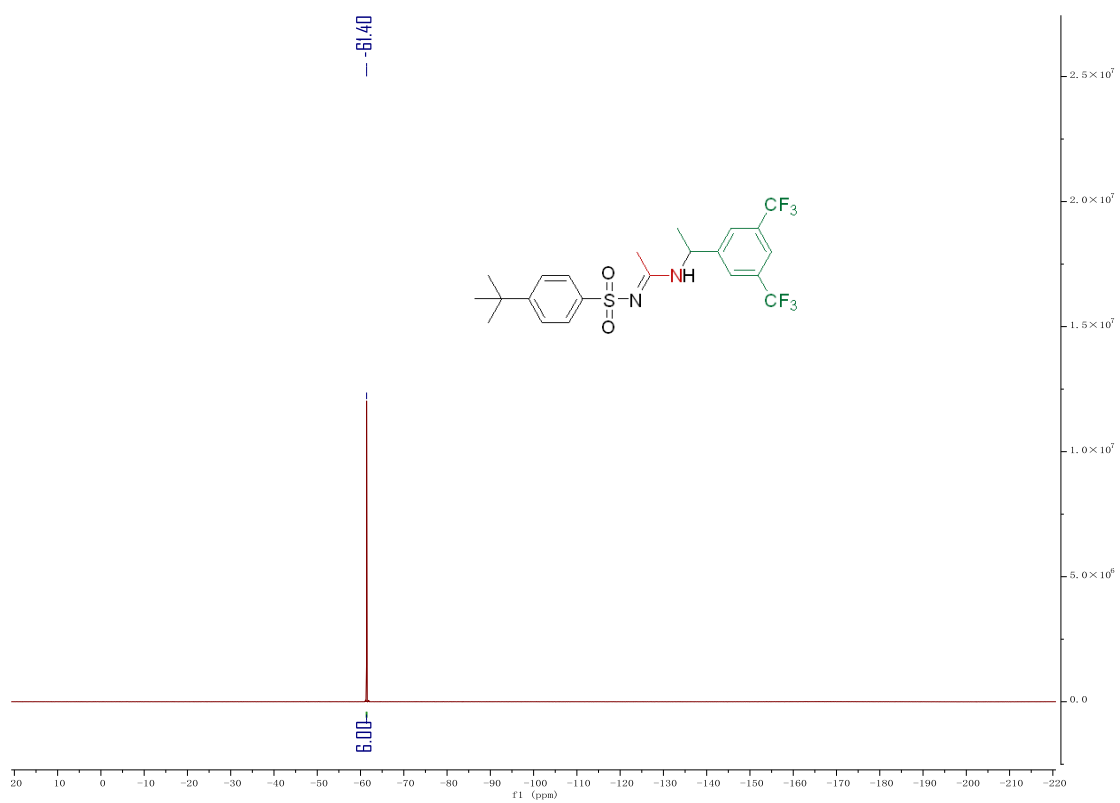

**<sup>1</sup>H NMR (400 MHz, DMSO-*d*<sub>6</sub>) of compound 5ak**

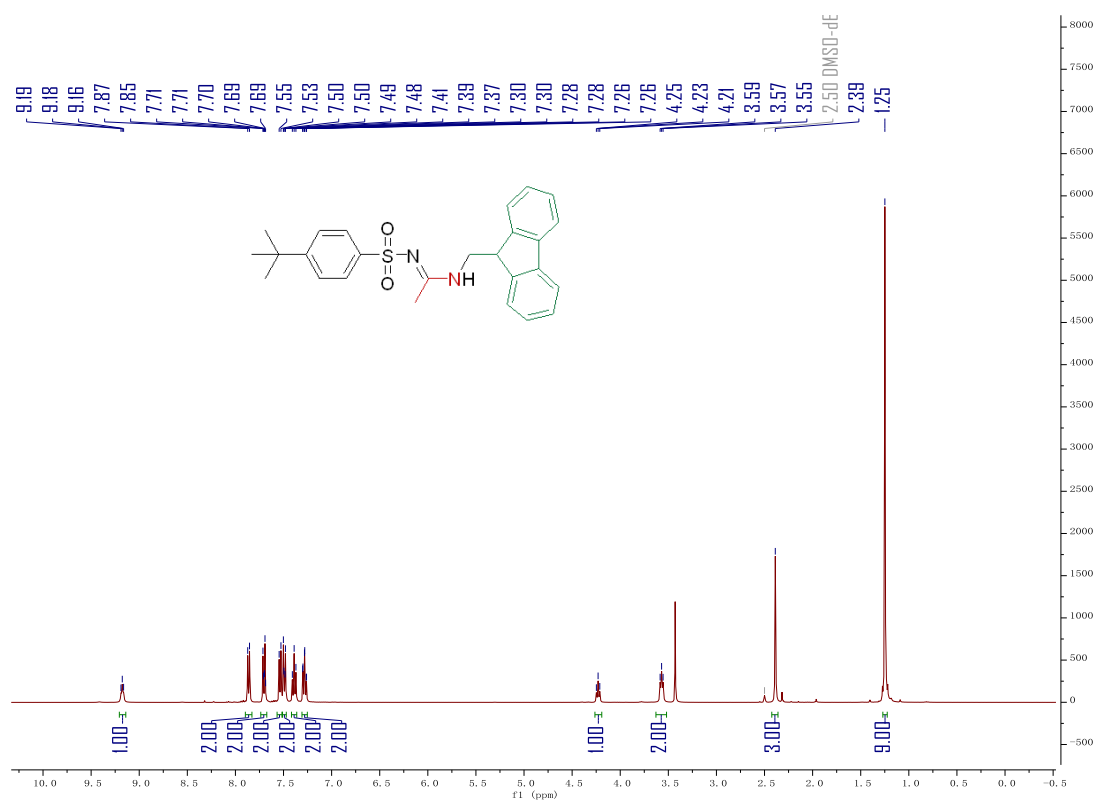

**<sup>13</sup>C NMR (100 MHz, DMSO-*d*<sub>6</sub>) of compound 5ak**

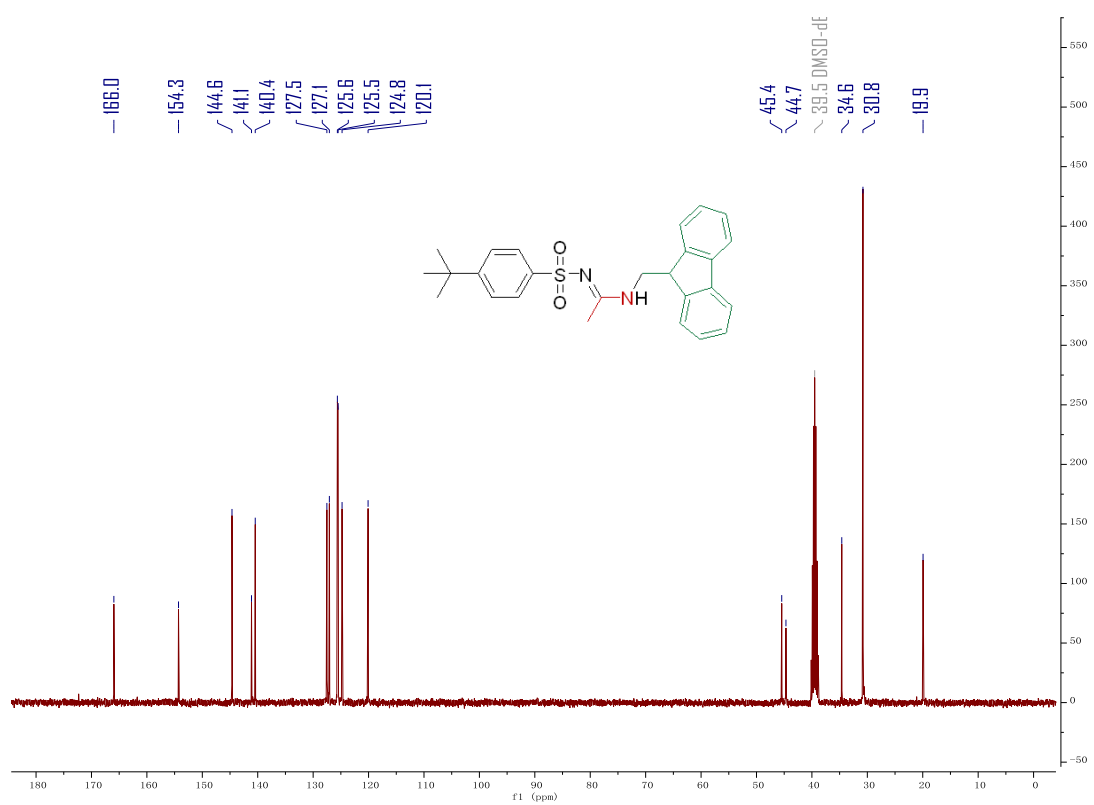

**<sup>1</sup>H NMR (400 MHz, DMSO-*d*<sub>6</sub>) of compound 5al**

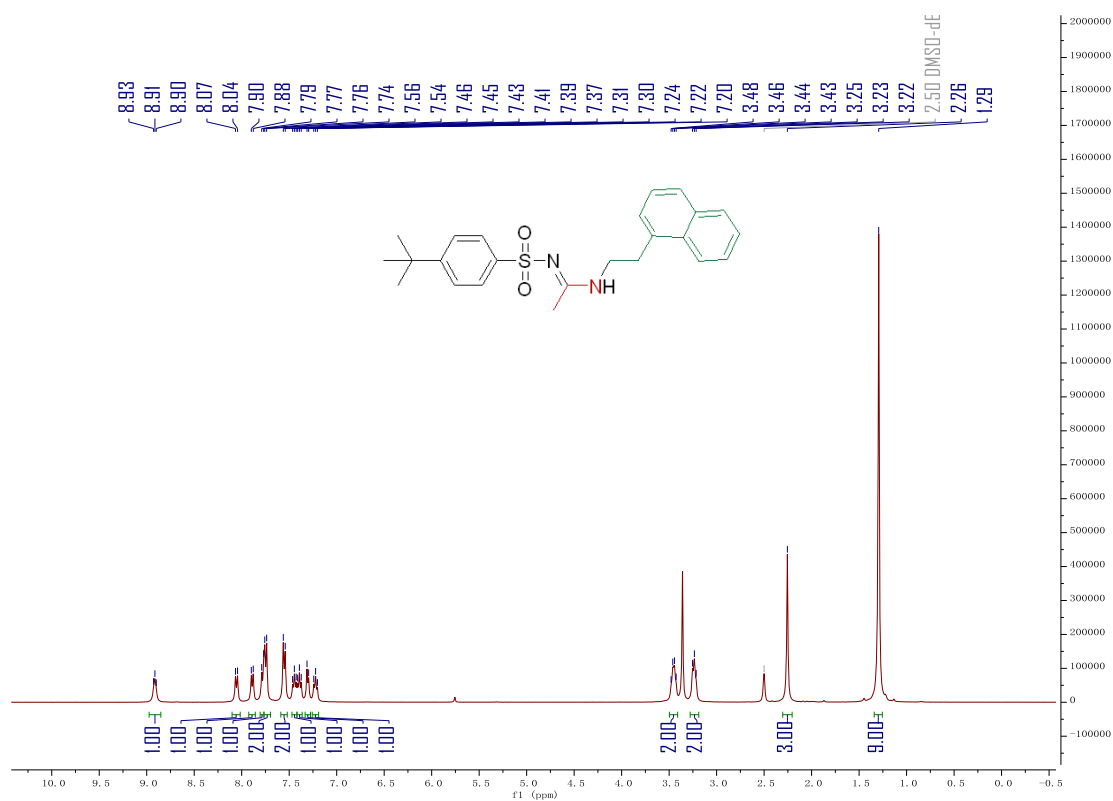

**<sup>13</sup>C NMR (100 MHz, DMSO-*d*<sub>6</sub>) of compound 5al**

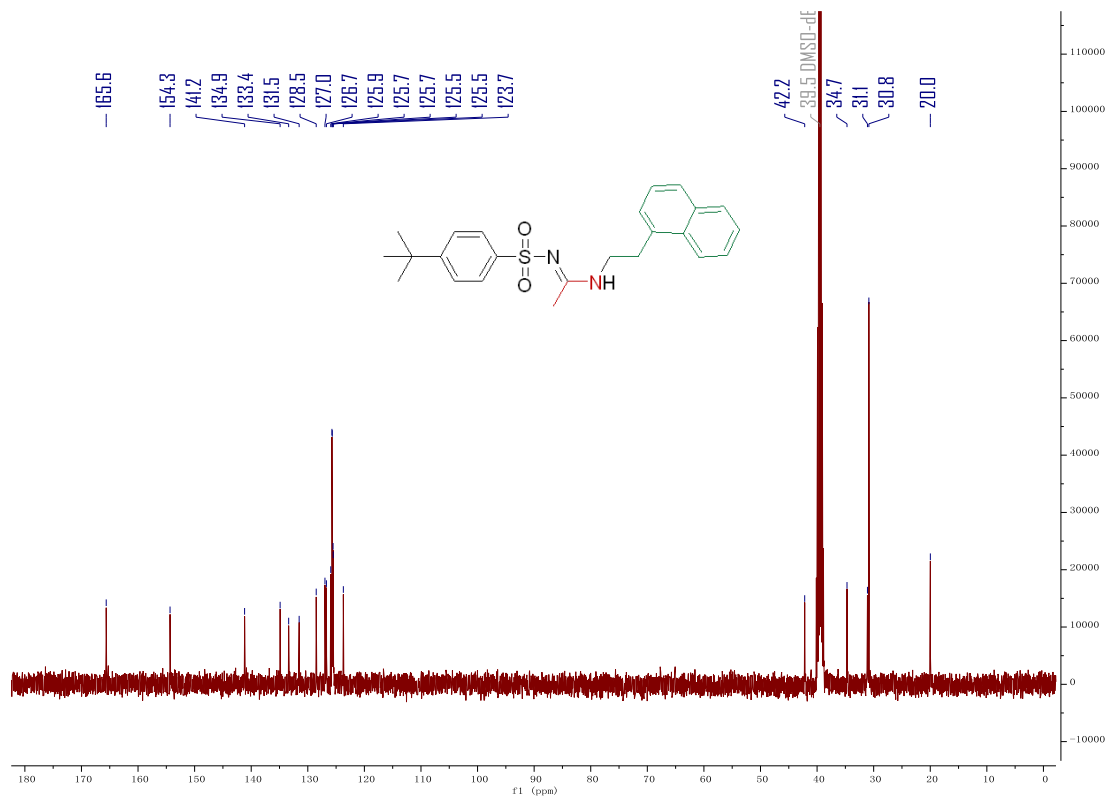



**<sup>1</sup>H NMR (400 MHz, DMSO-*d*<sub>6</sub>) of compound 5am**

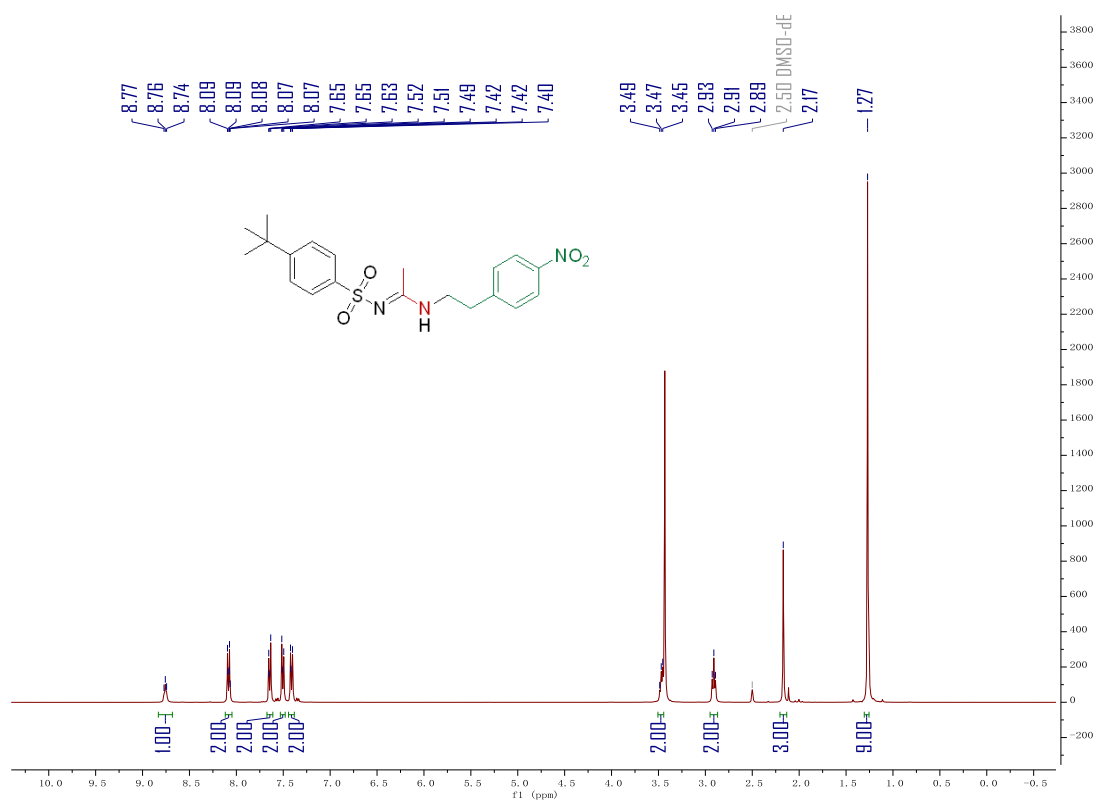

**<sup>13</sup>C NMR (100 MHz, DMSO-*d*<sub>6</sub>) of compound 5am**

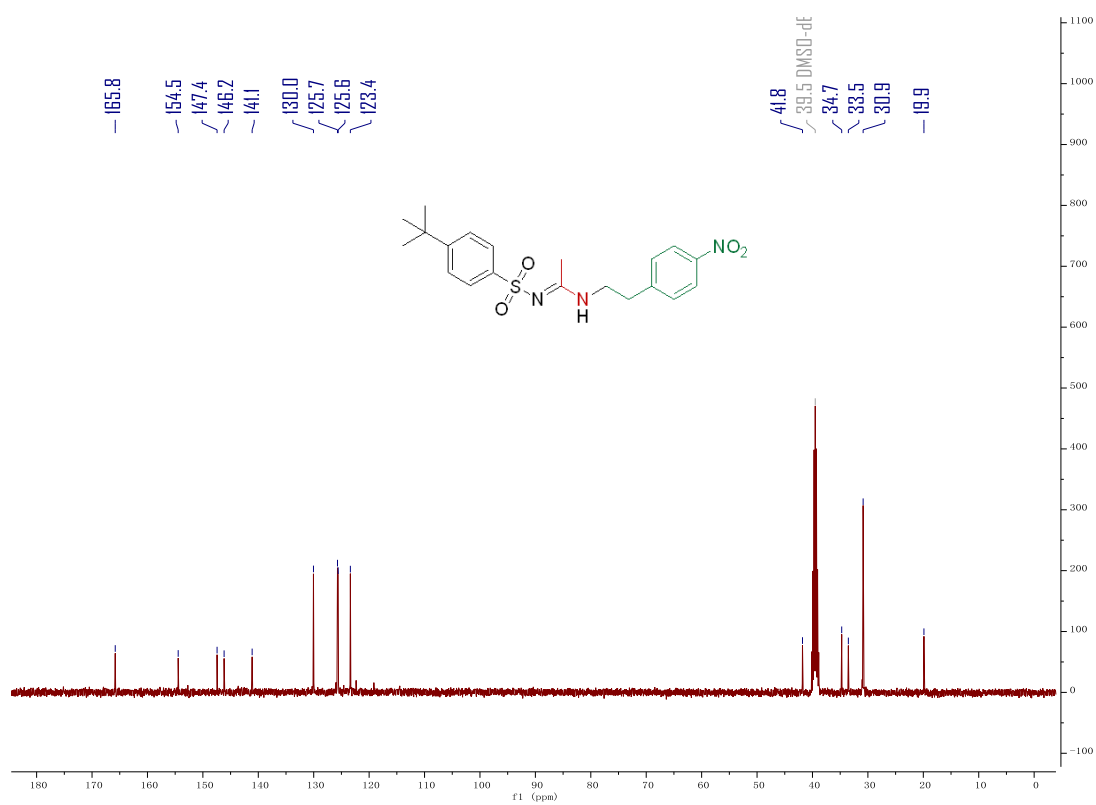

**<sup>1</sup>H NMR (400 MHz, DMSO-*d*<sub>6</sub>) of compound 5an**

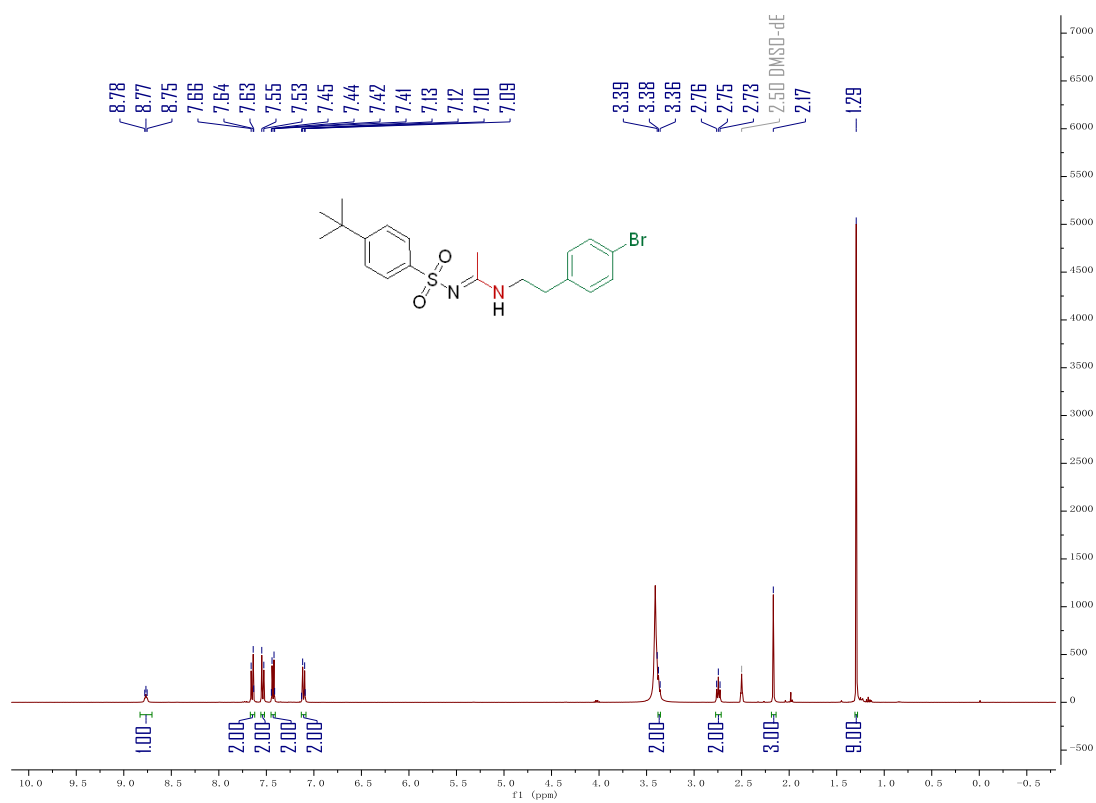

**<sup>13</sup>C NMR (100 MHz, DMSO-*d*<sub>6</sub>) of compound 5an**

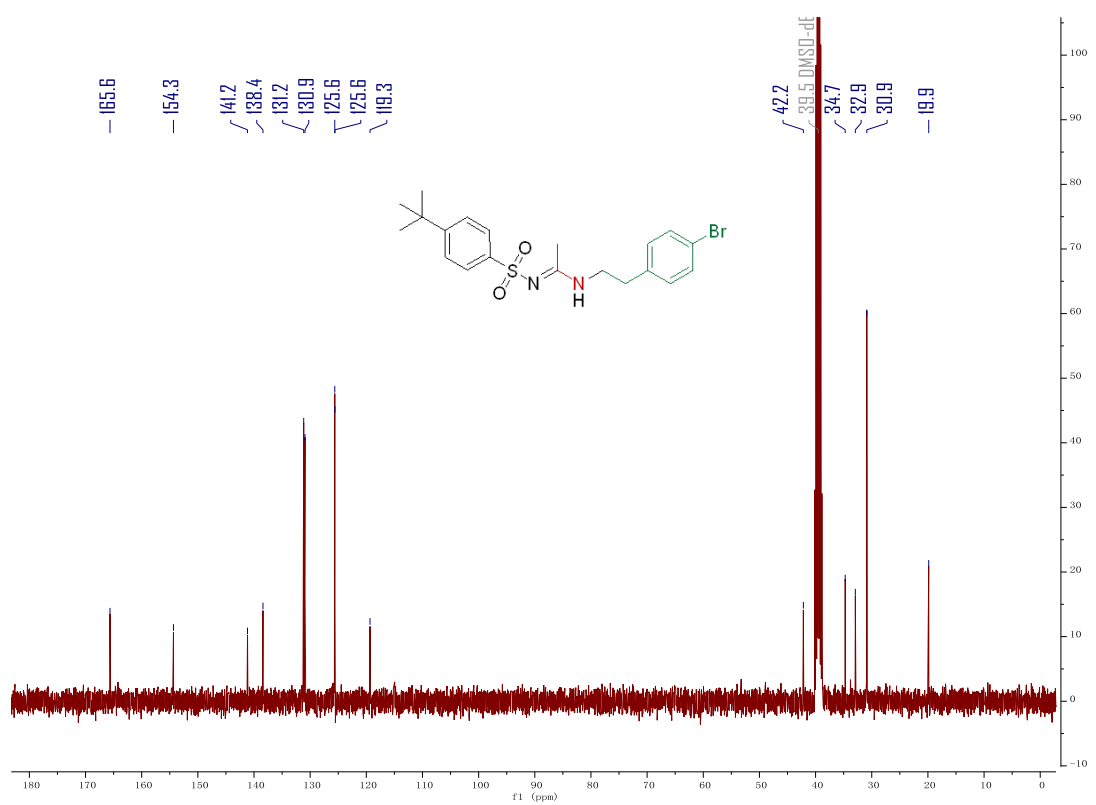

**<sup>1</sup>H NMR (400 MHz, DMSO-*d*<sub>6</sub>) of compound 5ao**

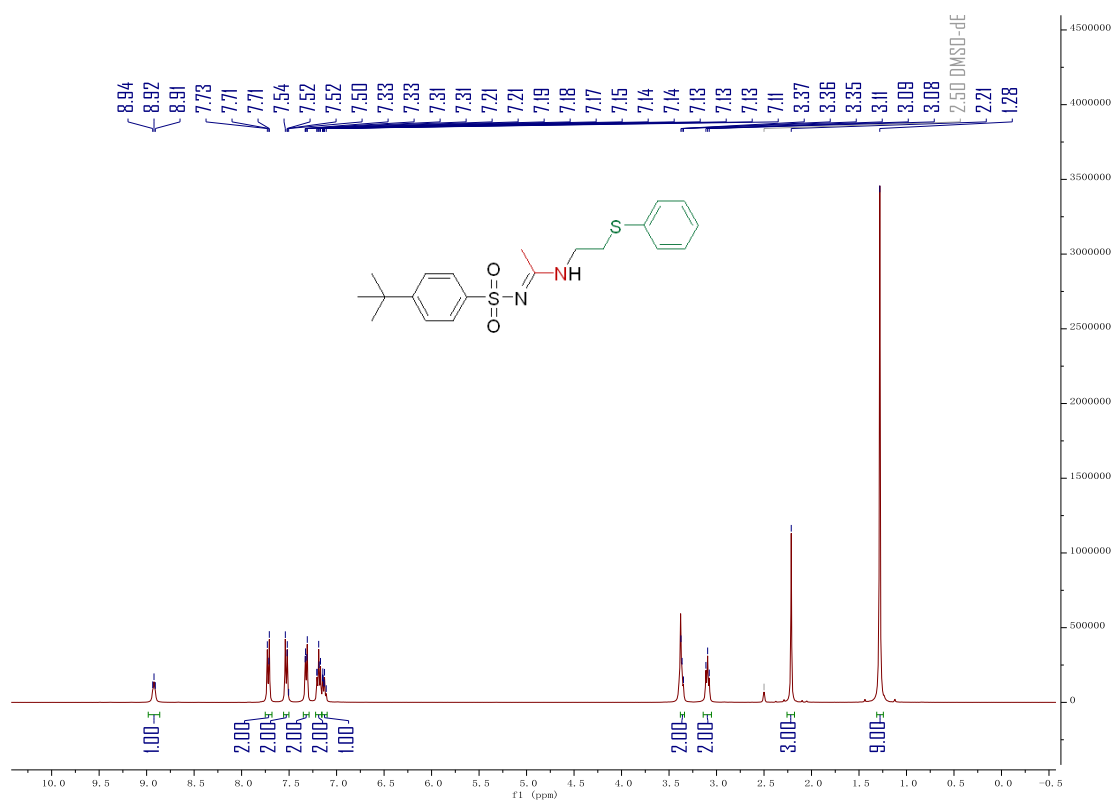

**<sup>13</sup>C NMR (100 MHz, DMSO-*d*<sub>6</sub>) of compound 5ao**

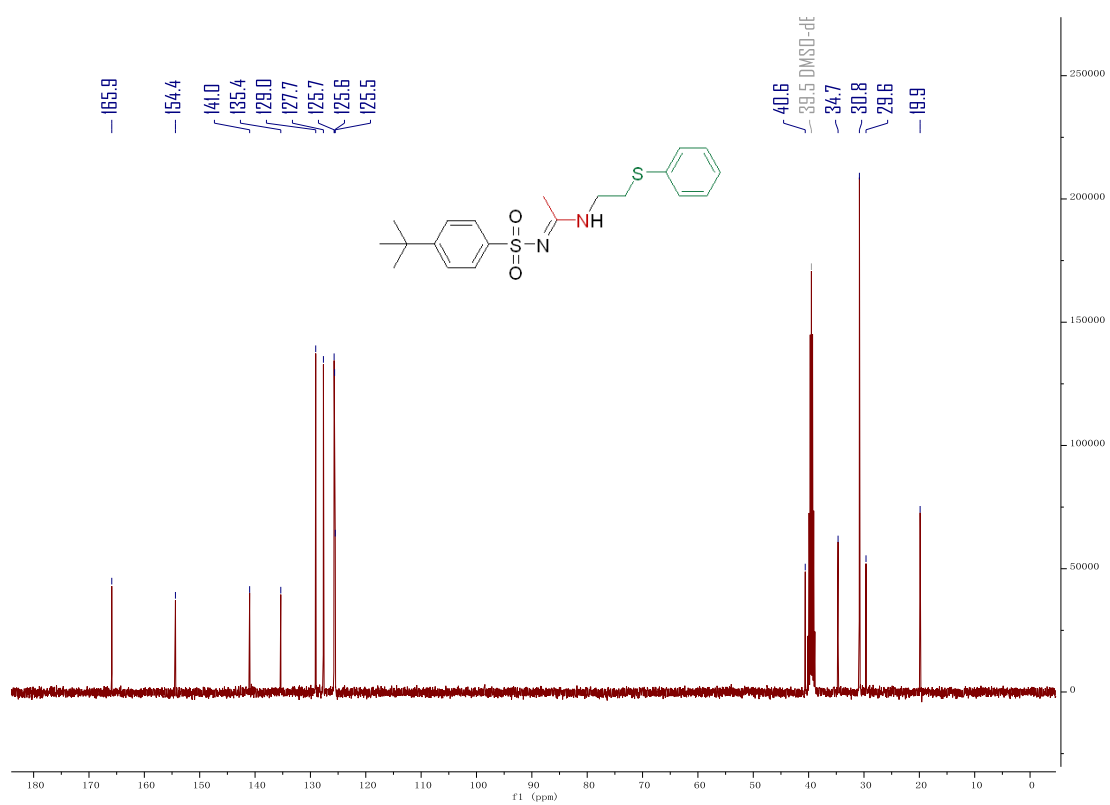

**<sup>1</sup>H NMR (400 MHz, DMSO-*d*<sub>6</sub>) of compound 5ap**

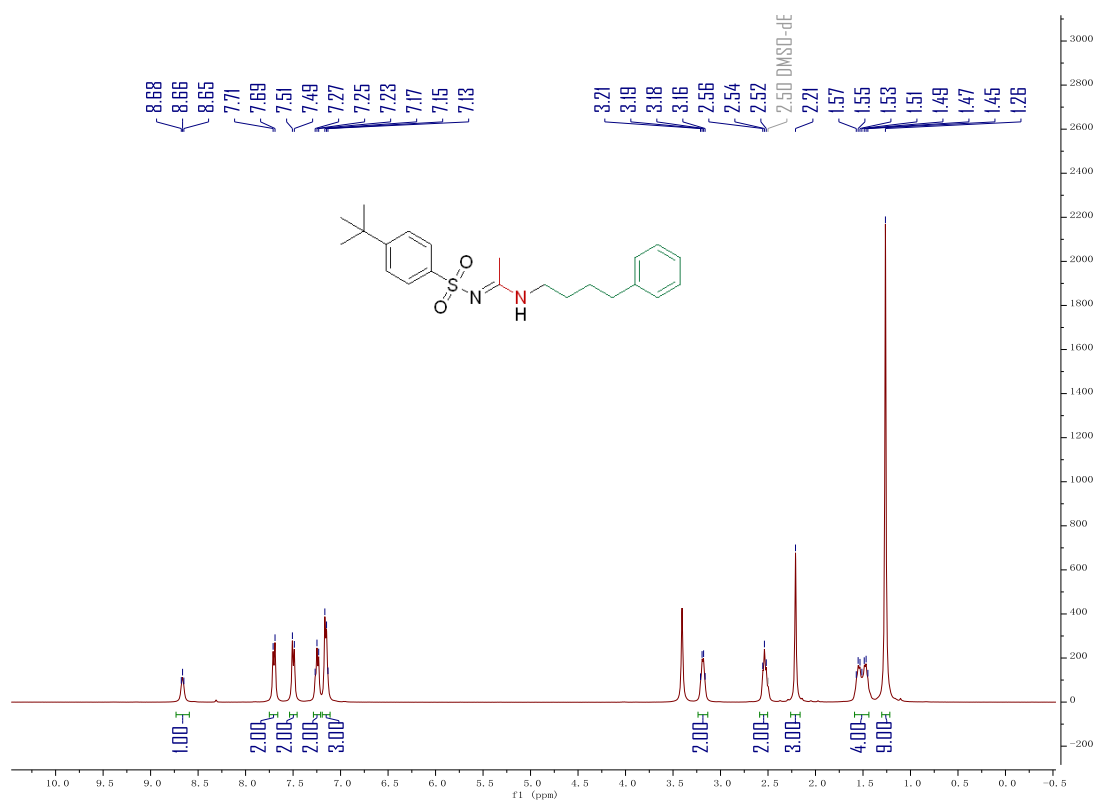

**<sup>13</sup>C NMR (100 MHz, DMSO-*d*<sub>6</sub>) of compound 5ap**

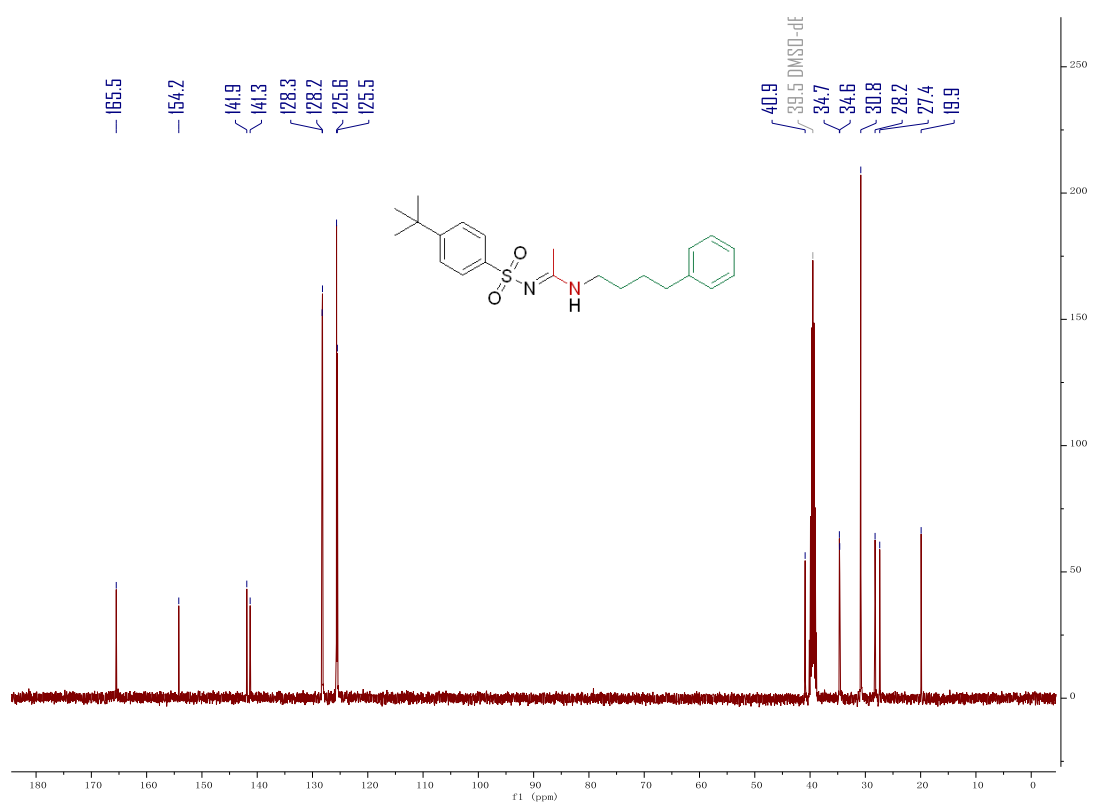

**<sup>1</sup>H NMR (400 MHz, DMSO-*d*<sub>6</sub>) of compound 5aq**

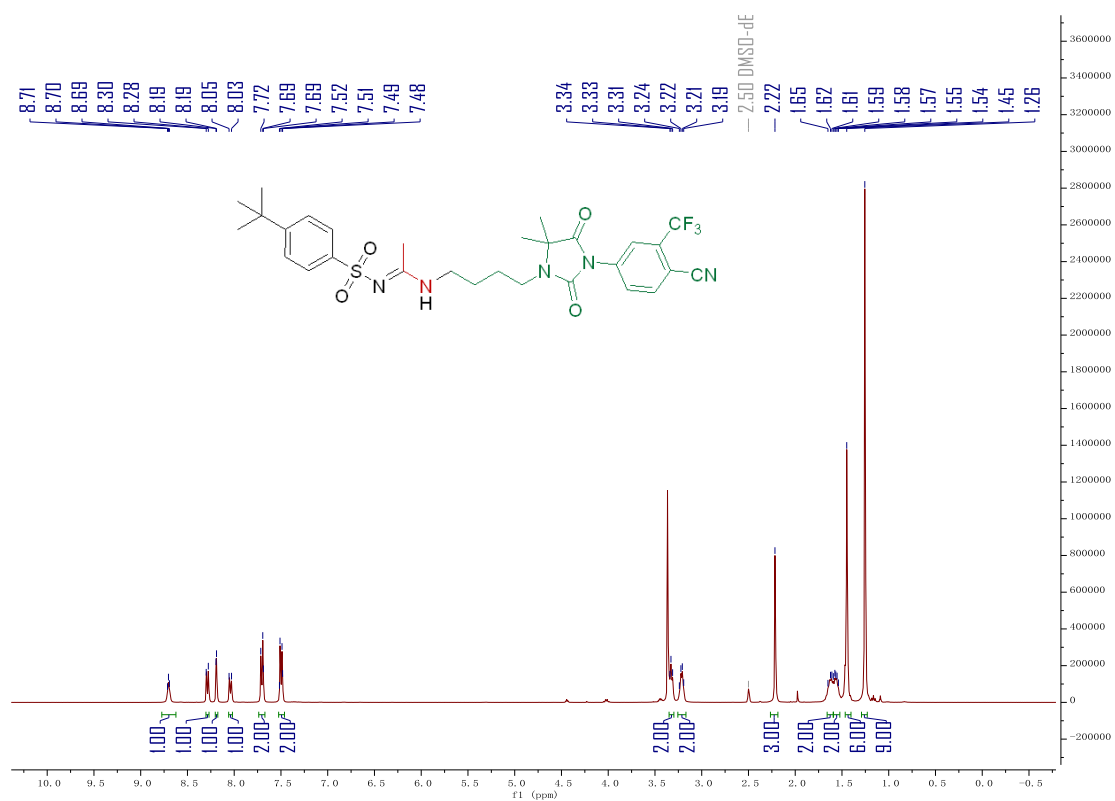

**<sup>13</sup>C NMR (100 MHz, DMSO-*d*<sub>6</sub>) of compound 5aq**

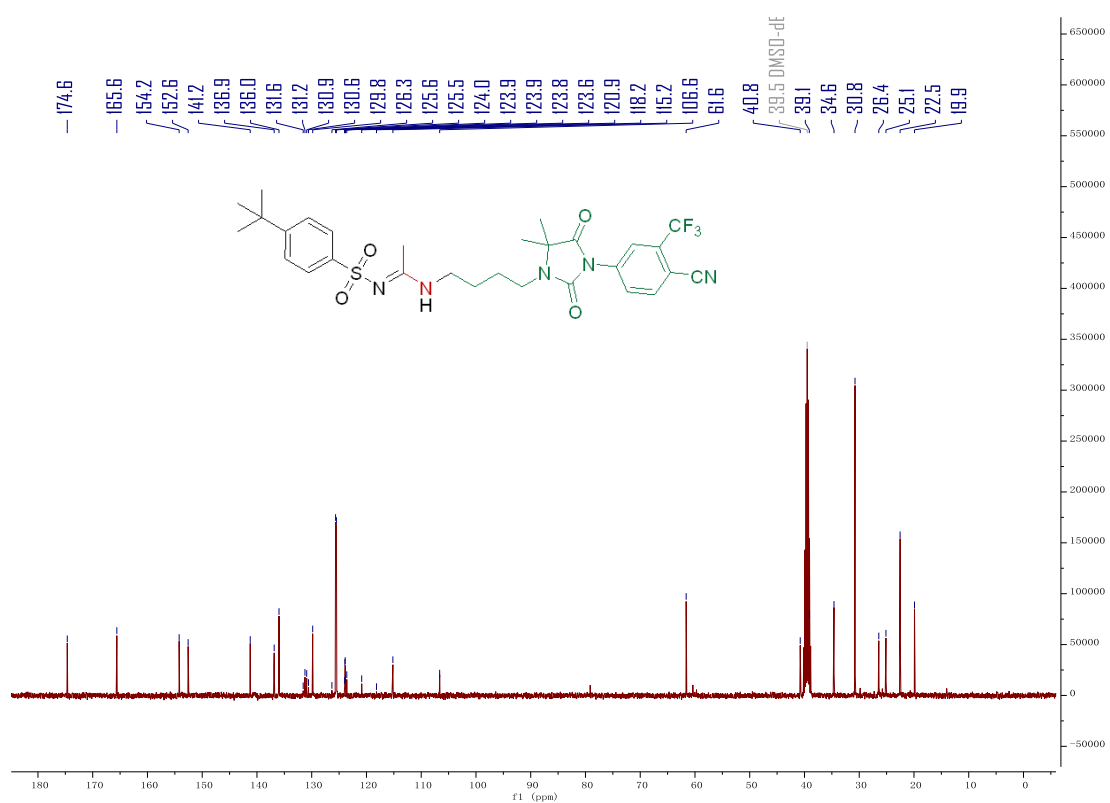

**<sup>19</sup>F NMR (376 MHz, DMSO-*d*<sub>6</sub>) of compound 5aq**

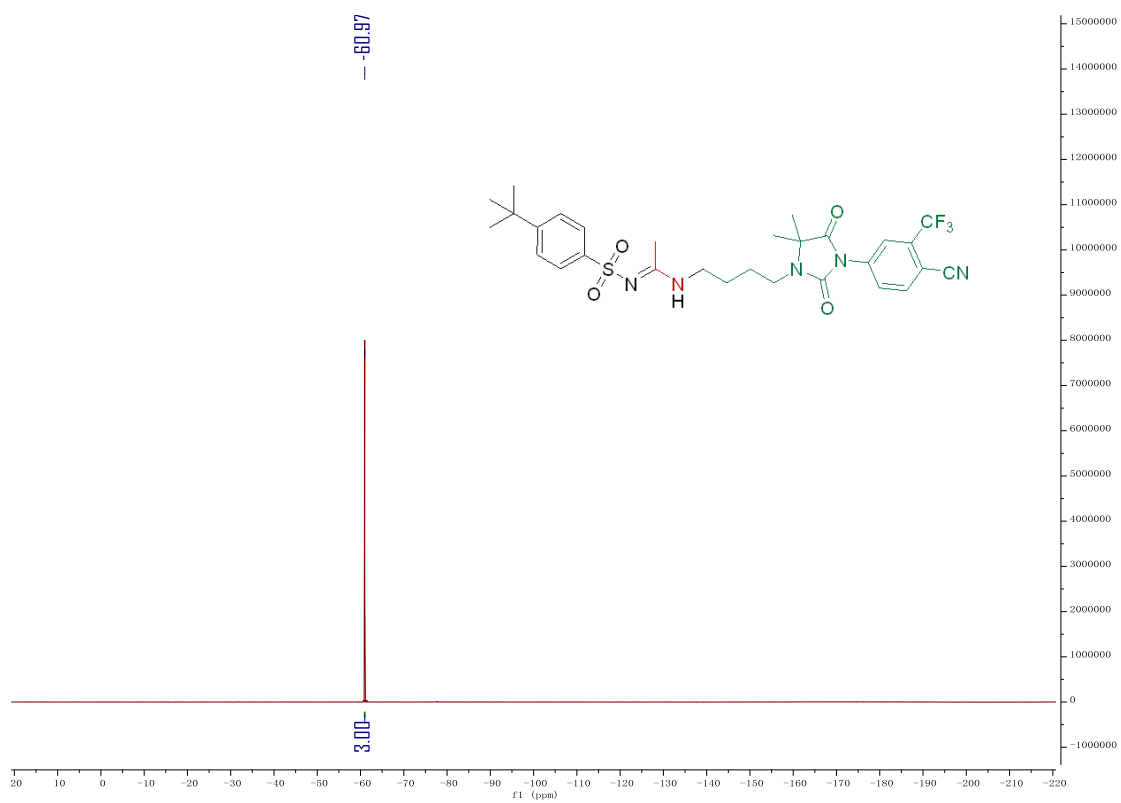

**<sup>1</sup>H NMR (400 MHz, DMSO-*d*<sub>6</sub>) of compound 6a**

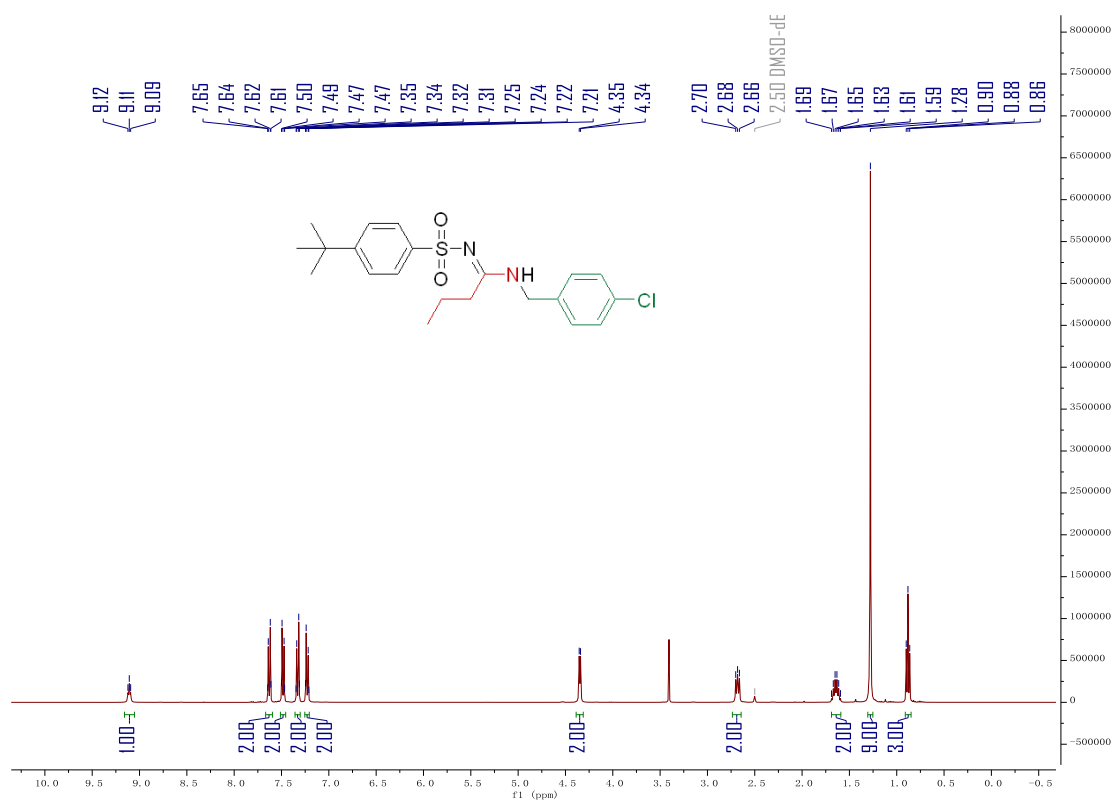

**<sup>13</sup>C NMR (100 MHz, DMSO-*d*<sub>6</sub>) of compound 6a**

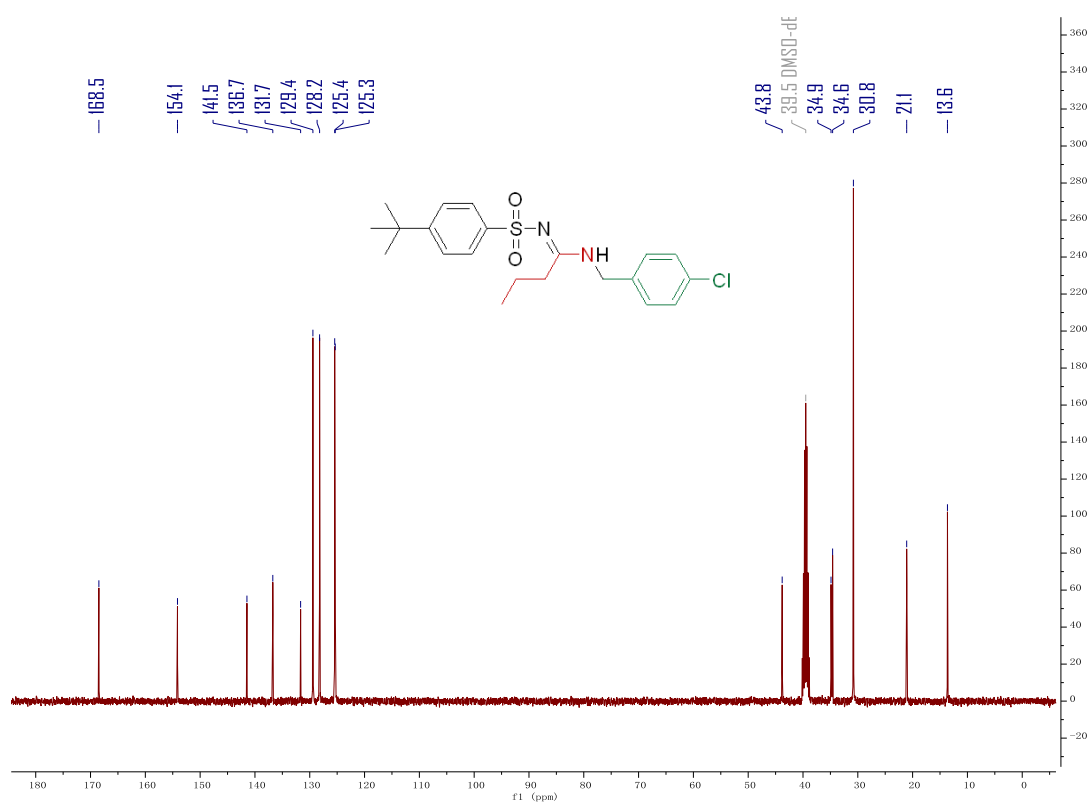

**<sup>1</sup>H NMR (400 MHz, DMSO-*d*<sub>6</sub>) of compound 6b**

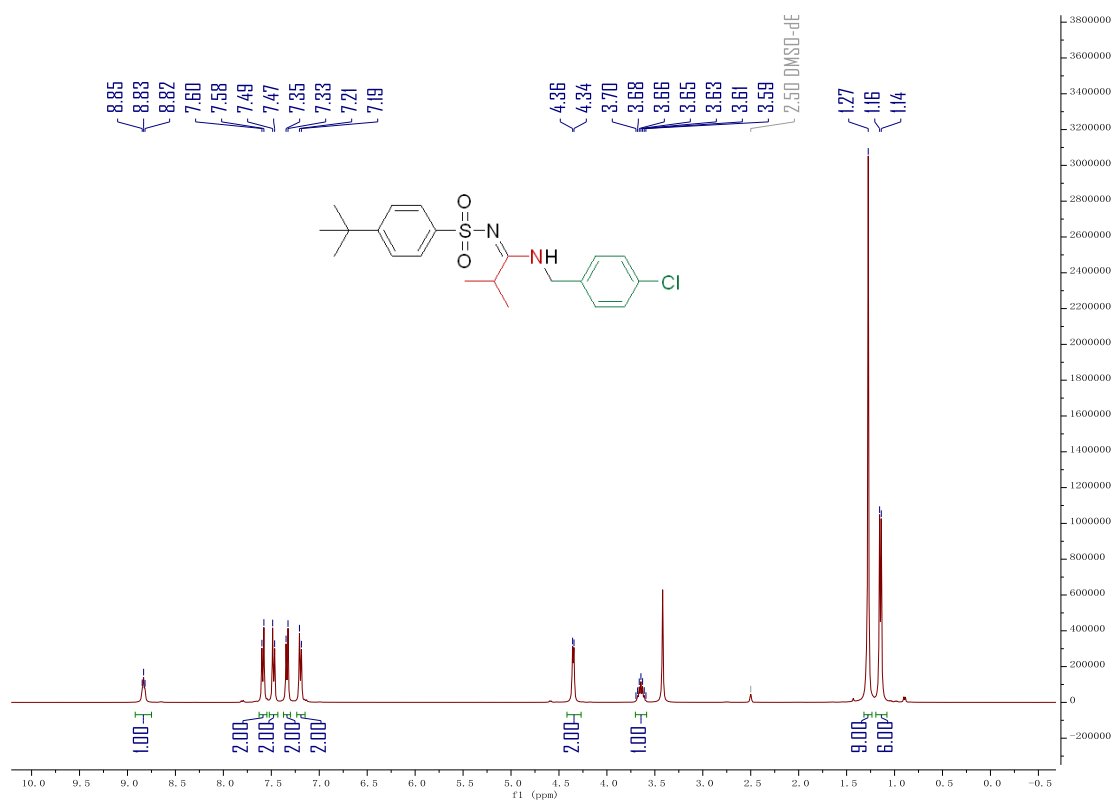

**<sup>13</sup>C NMR (100 MHz, DMSO-*d*<sub>6</sub>) of compound 6b**

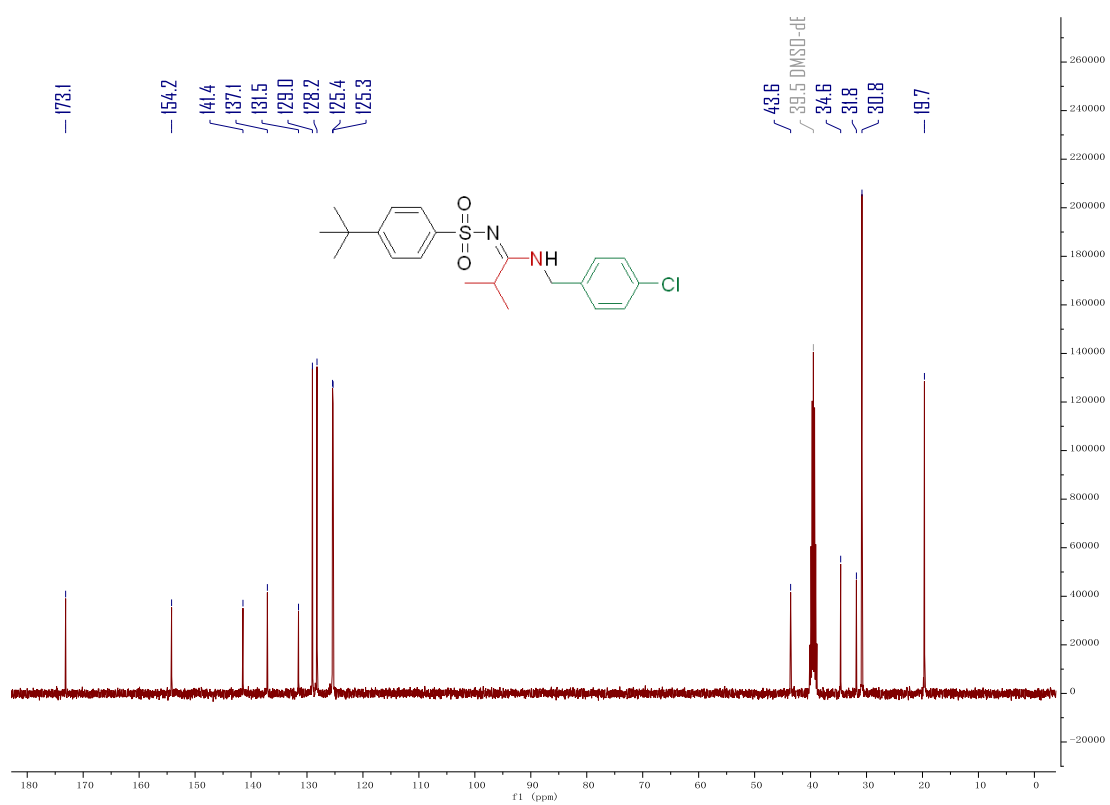



**<sup>1</sup>H NMR (400 MHz, DMSO-*d*<sub>6</sub>) of compound 6c**

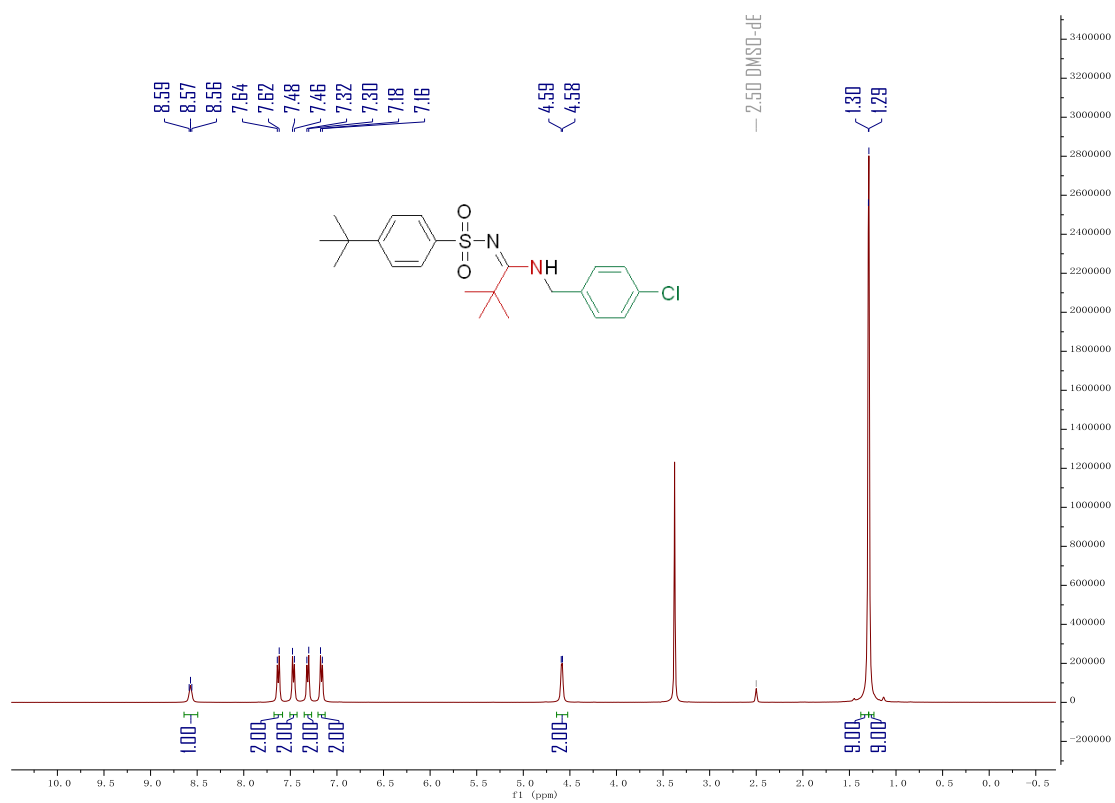

**<sup>13</sup>C NMR (100 MHz, DMSO-*d*<sub>6</sub>) of compound 6c**

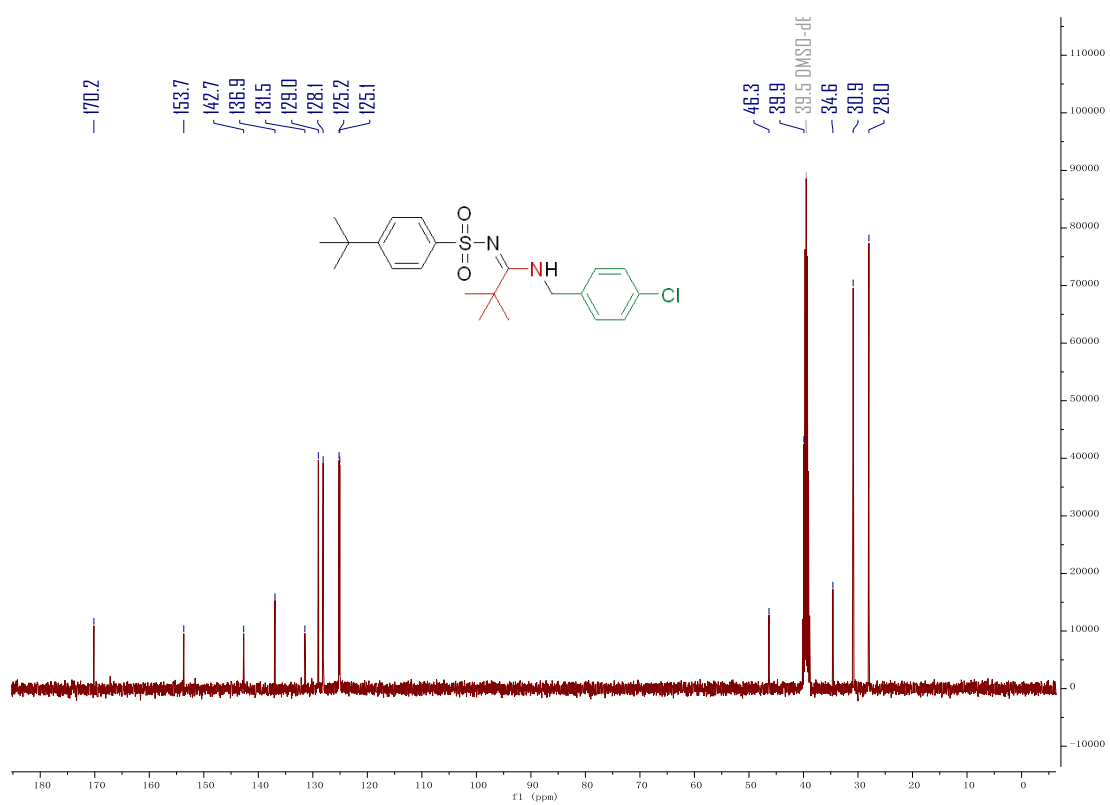

**<sup>1</sup>H NMR (400 MHz, DMSO-*d*<sub>6</sub>) of compound 6d**

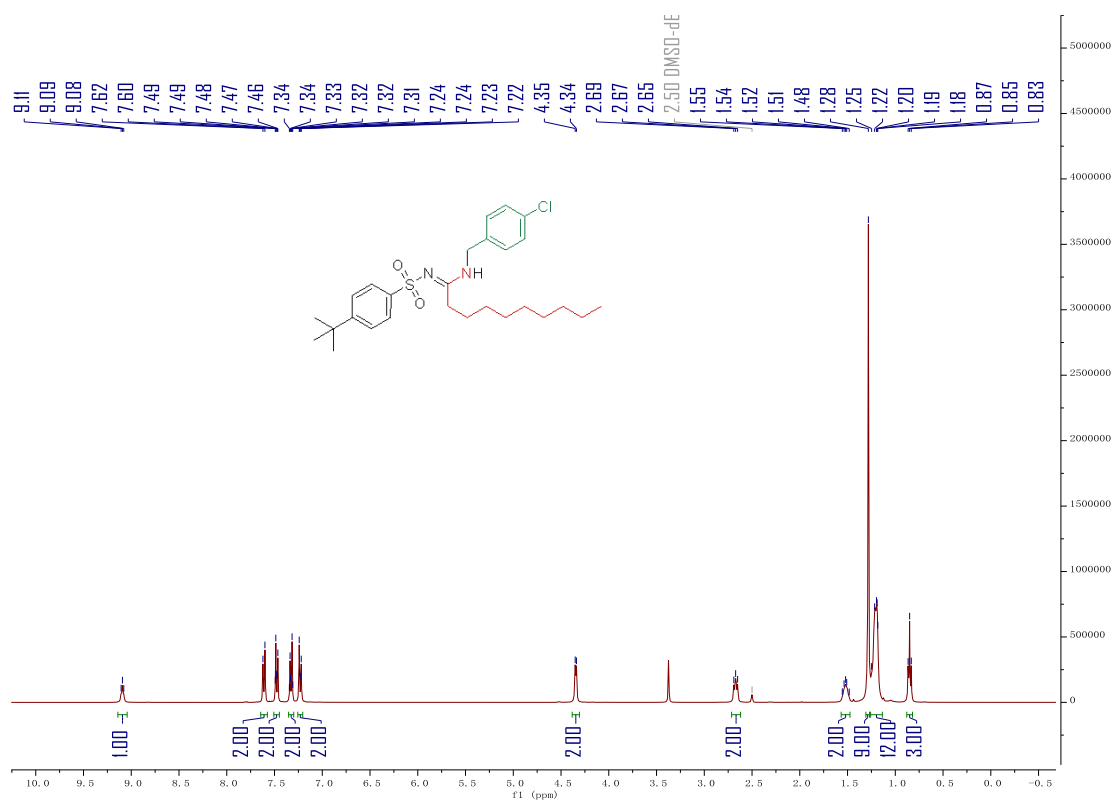

**<sup>13</sup>C NMR (100 MHz, DMSO-*d*<sub>6</sub>) of compound 6d**

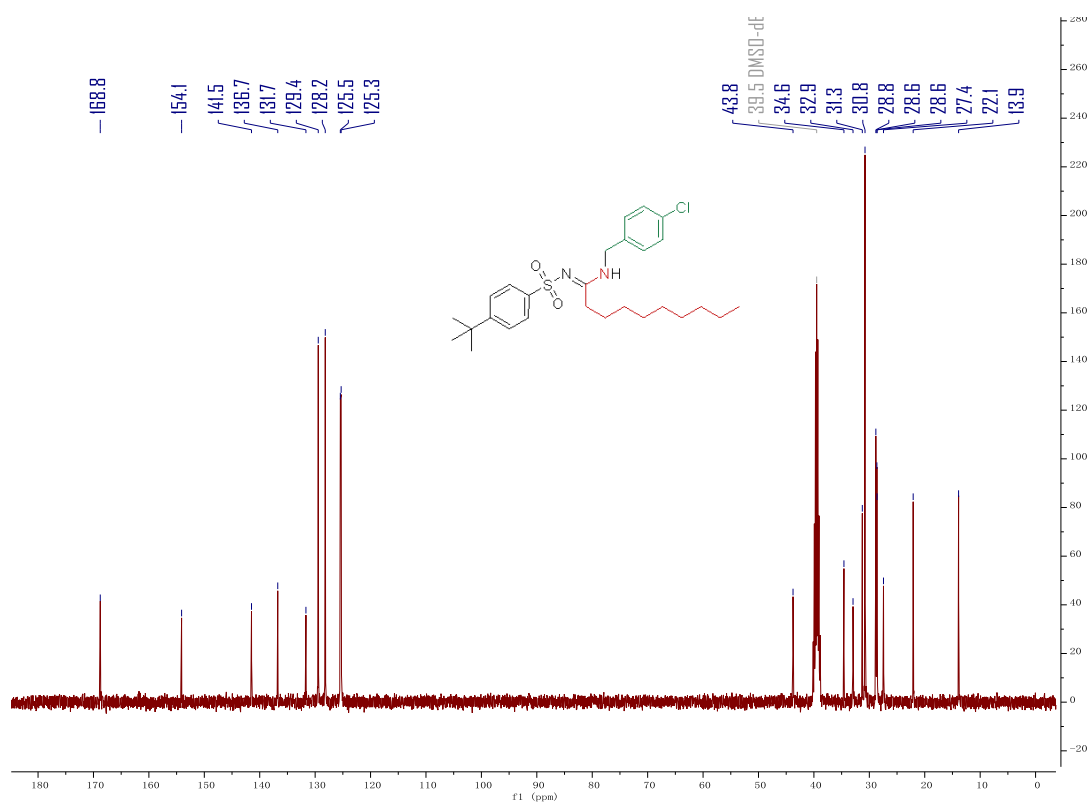

**<sup>1</sup>H NMR (400 MHz, DMSO-*d*<sub>6</sub>) of compound 6e**

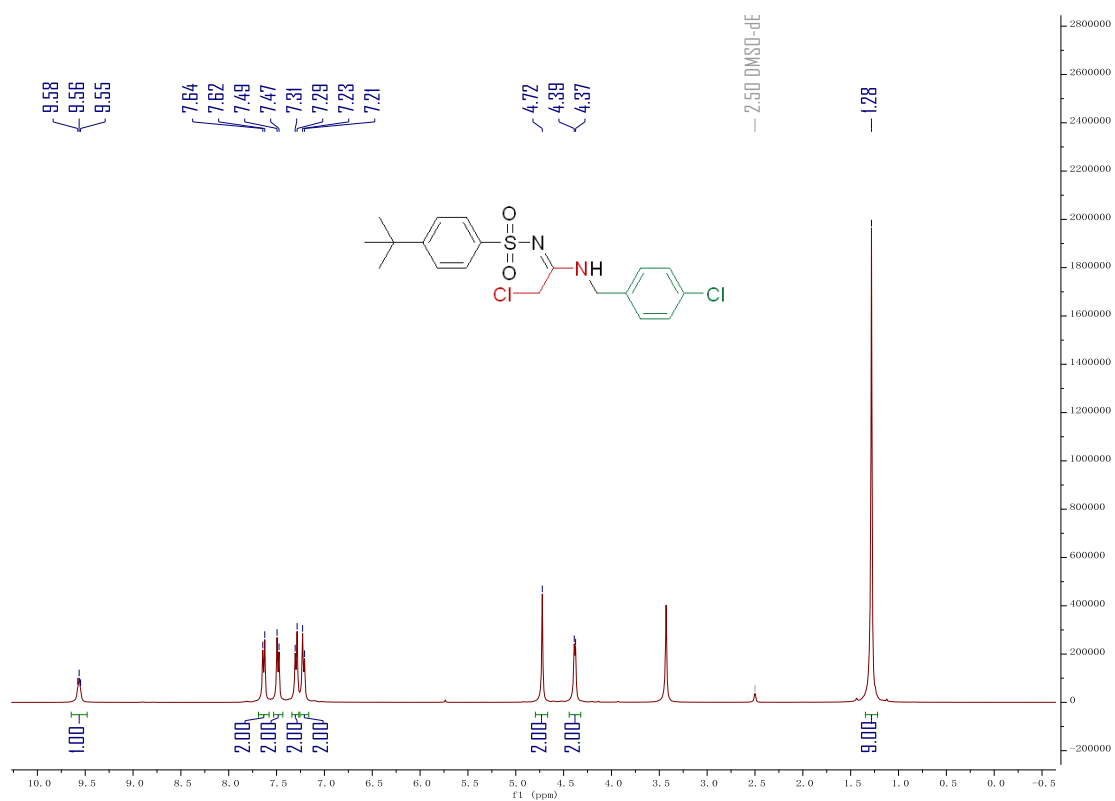

**<sup>13</sup>C NMR (100 MHz, DMSO-*d*<sub>6</sub>) of compound 6e**

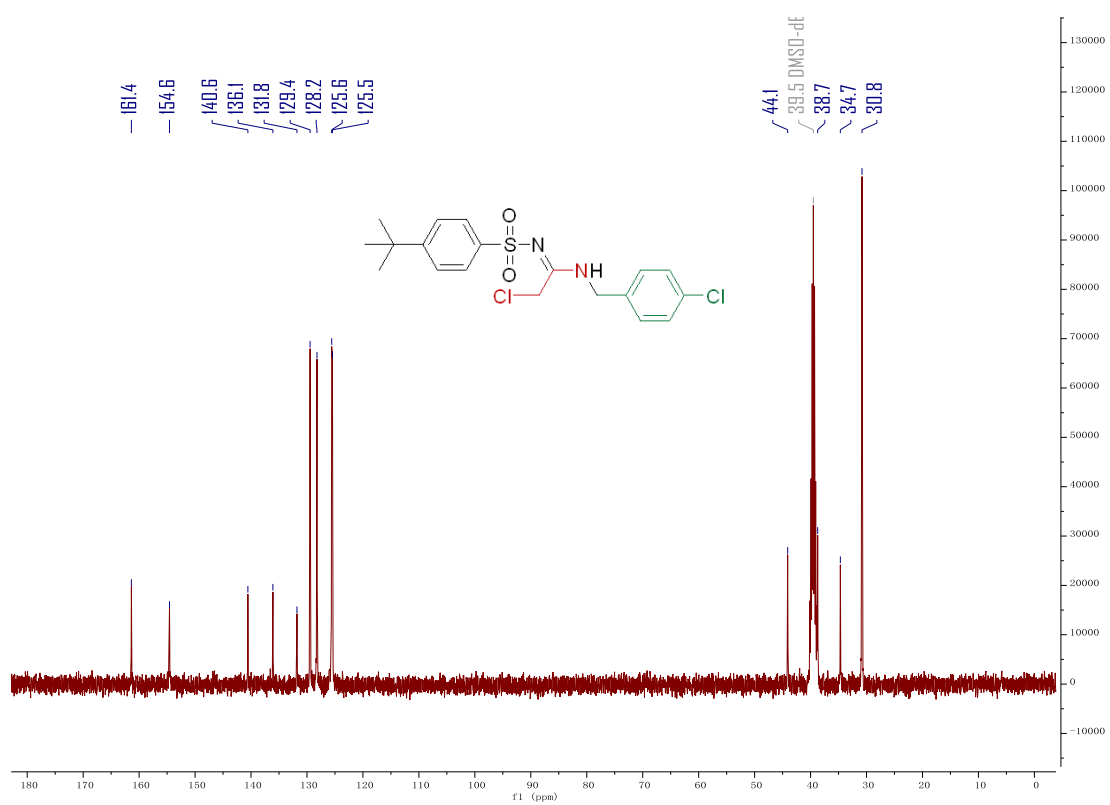



**<sup>1</sup>H NMR (400 MHz, DMSO-*d*<sub>6</sub>) of compound 6g**

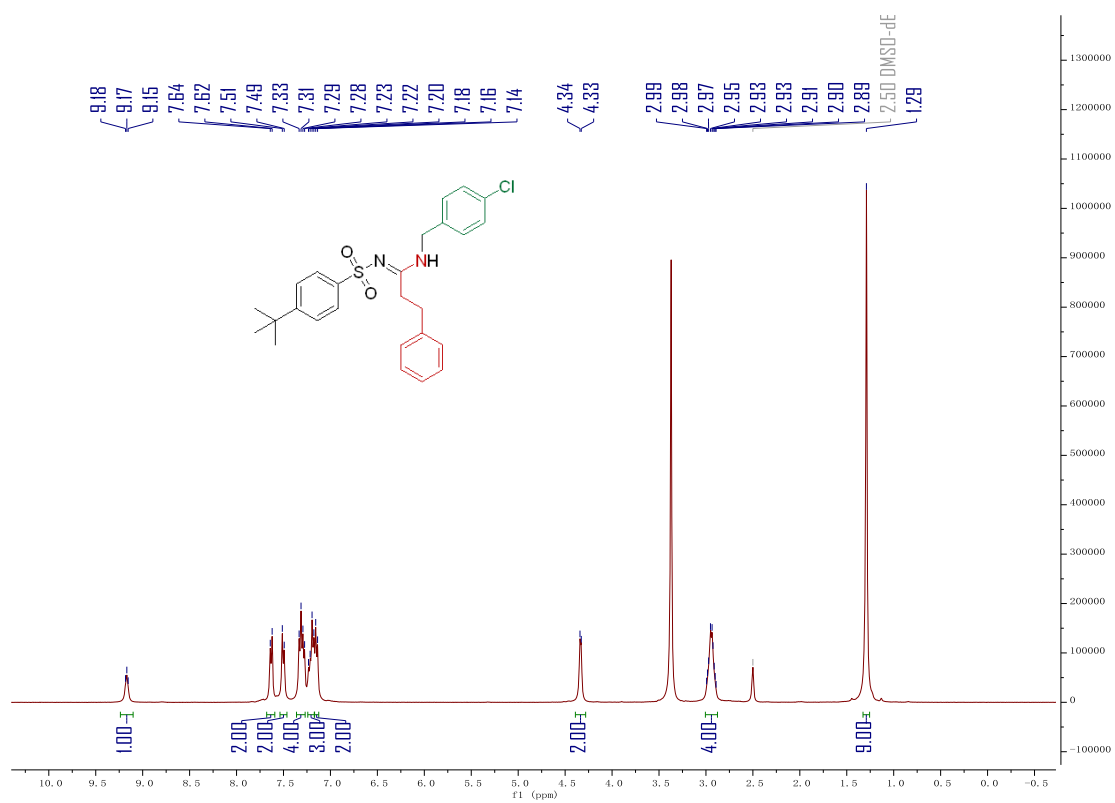

**<sup>13</sup>C NMR (100 MHz, DMSO-*d*<sub>6</sub>) of compound 6g**

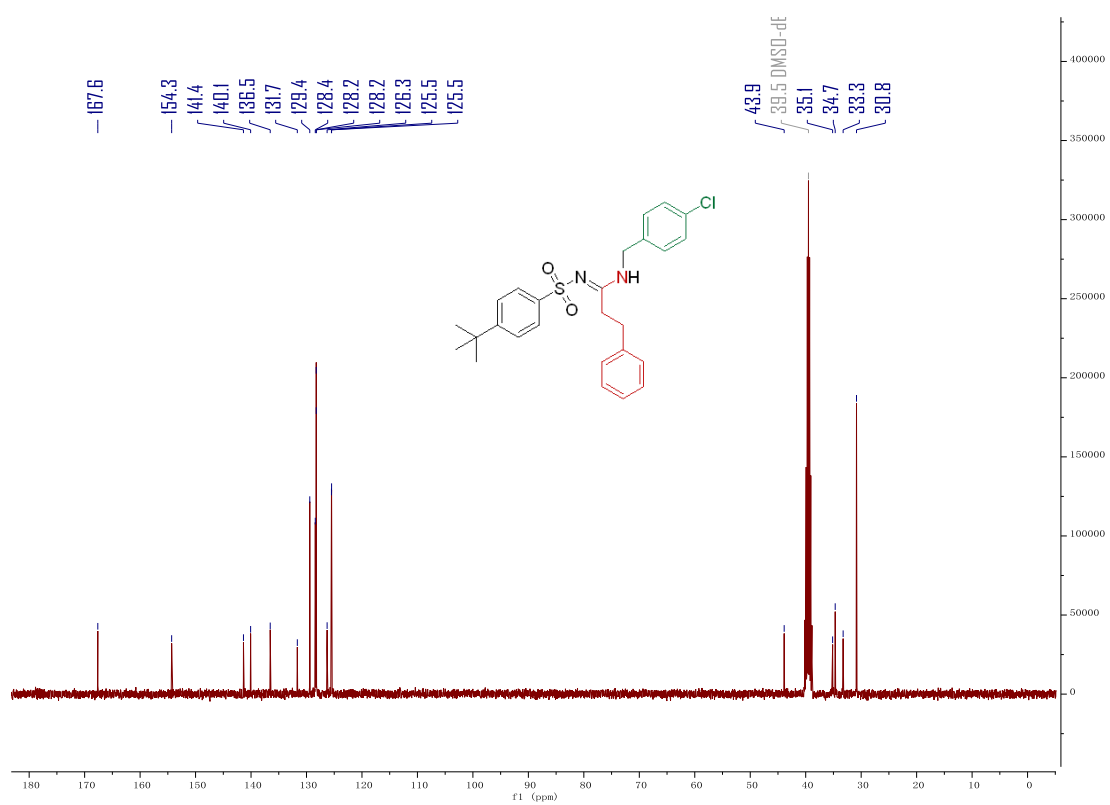

**<sup>1</sup>H NMR (400 MHz, DMSO-*d*<sub>6</sub>) of compound 6h**

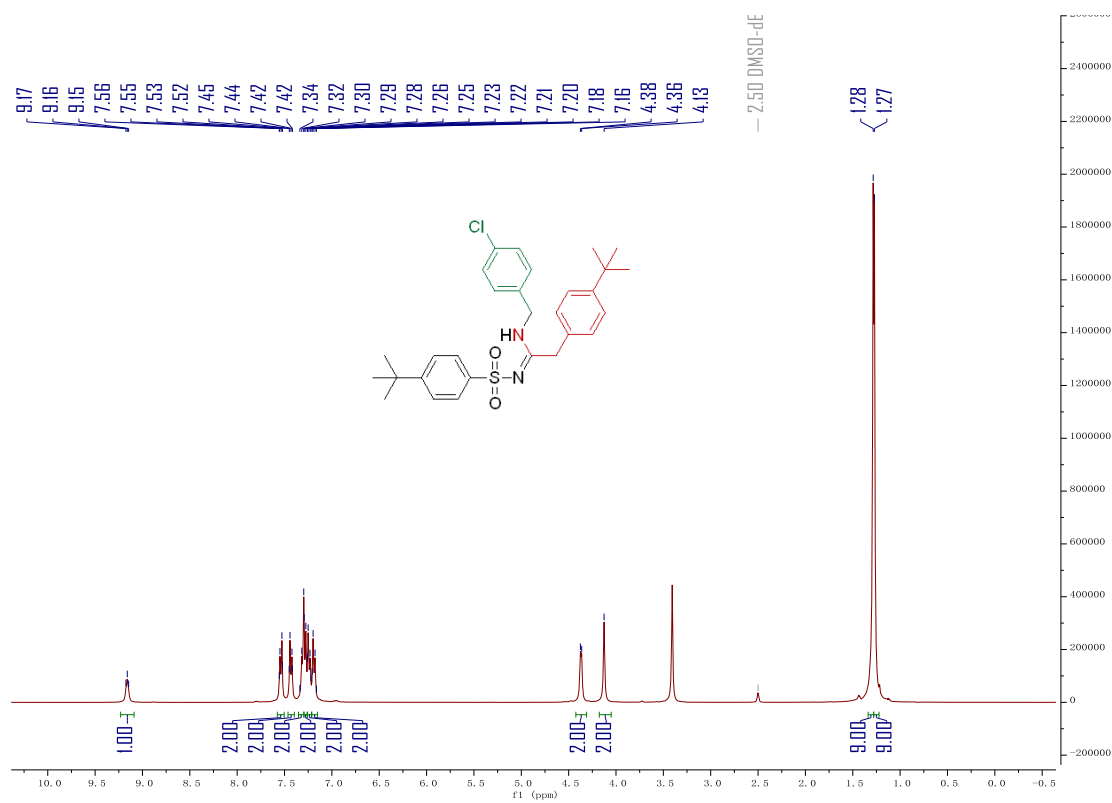

**<sup>13</sup>C NMR (100 MHz, DMSO-*d*<sub>6</sub>) of compound 6h**

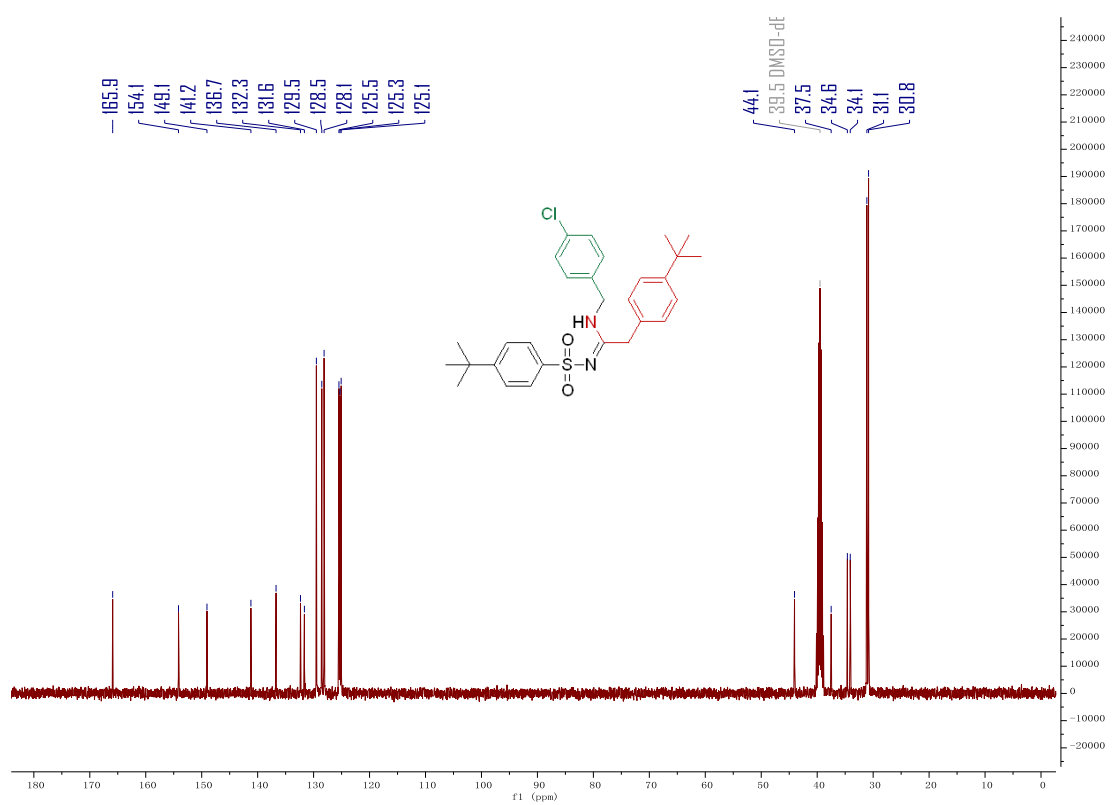

**<sup>1</sup>H NMR (400 MHz, DMSO-*d*<sub>6</sub>) of compound **6i****

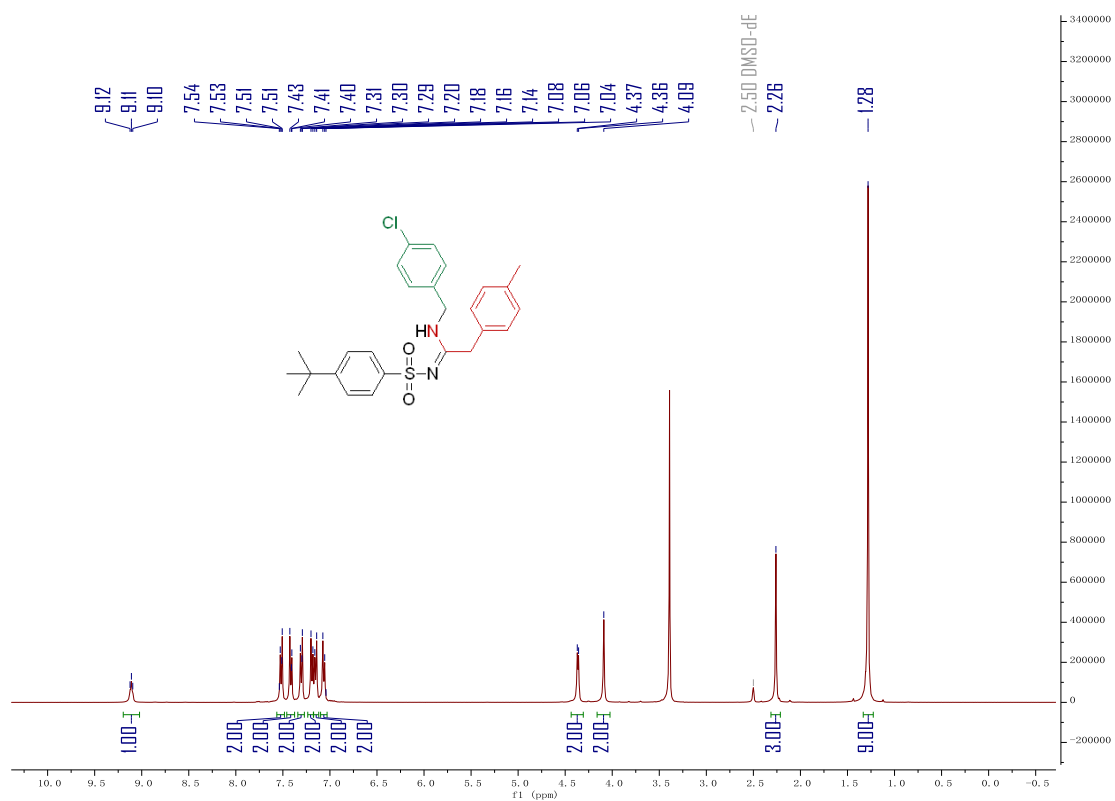

**<sup>13</sup>C NMR (100 MHz, DMSO-*d*<sub>6</sub>) of compound **6i****

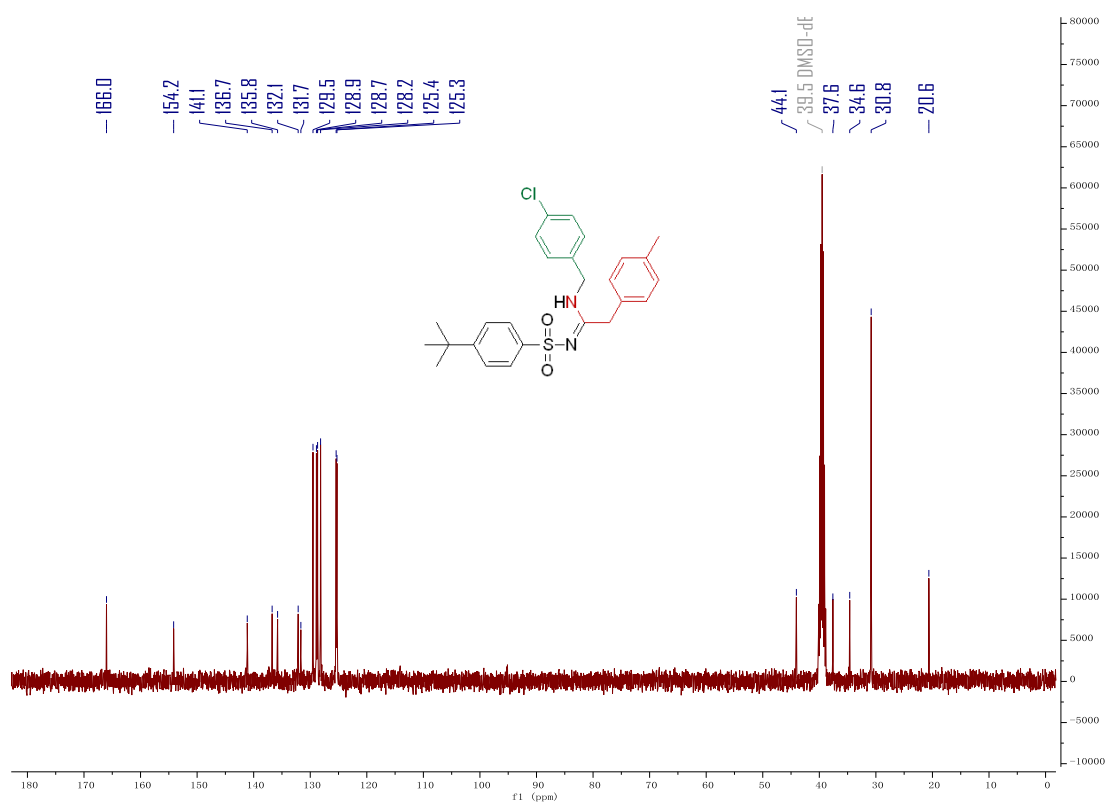

**<sup>1</sup>H NMR (400 MHz, DMSO-*d*<sub>6</sub>) of compound 6j**

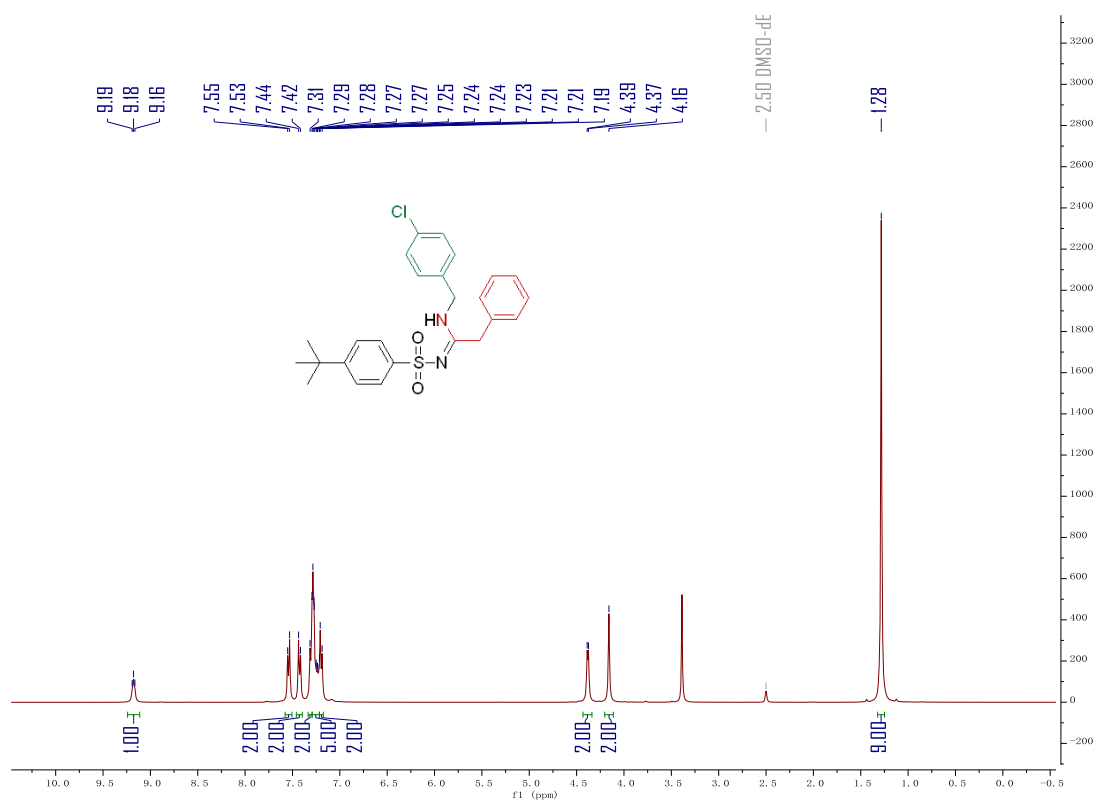

**<sup>13</sup>C NMR (100 MHz, DMSO-*d*<sub>6</sub>) of compound 6j**

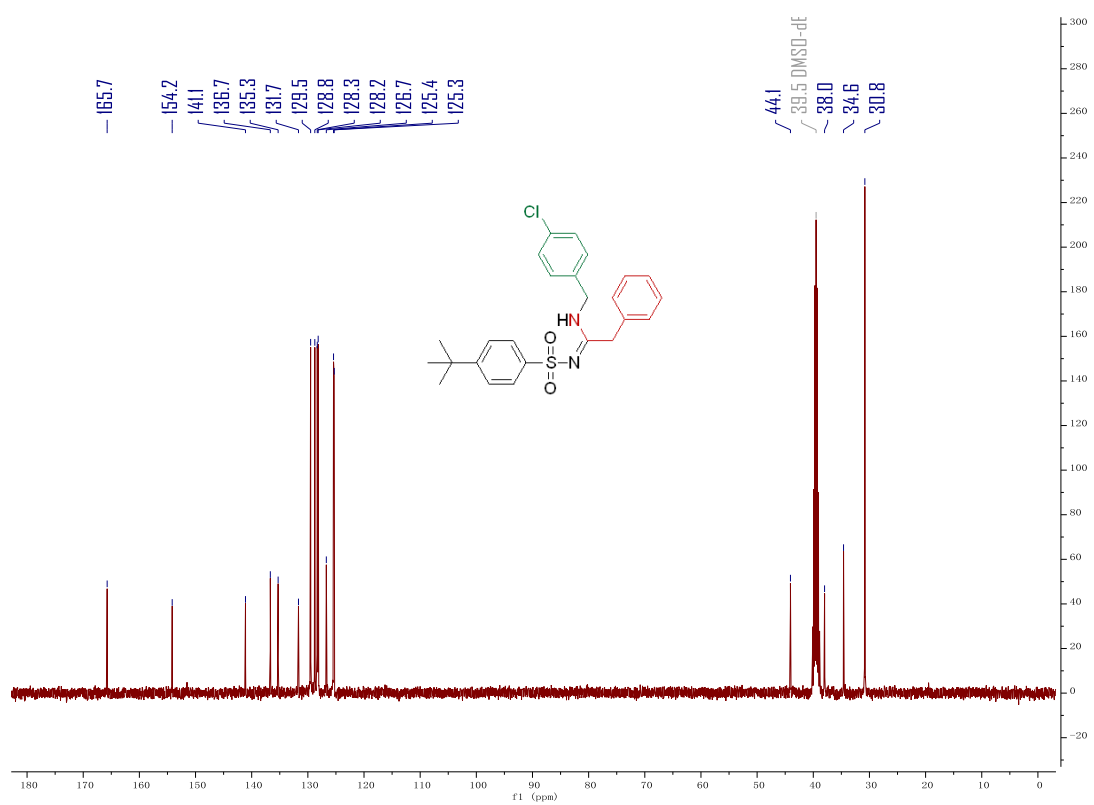



<sup>1</sup>H NMR (400 MHz, DMSO-d<sub>6</sub>) of compound **6k**

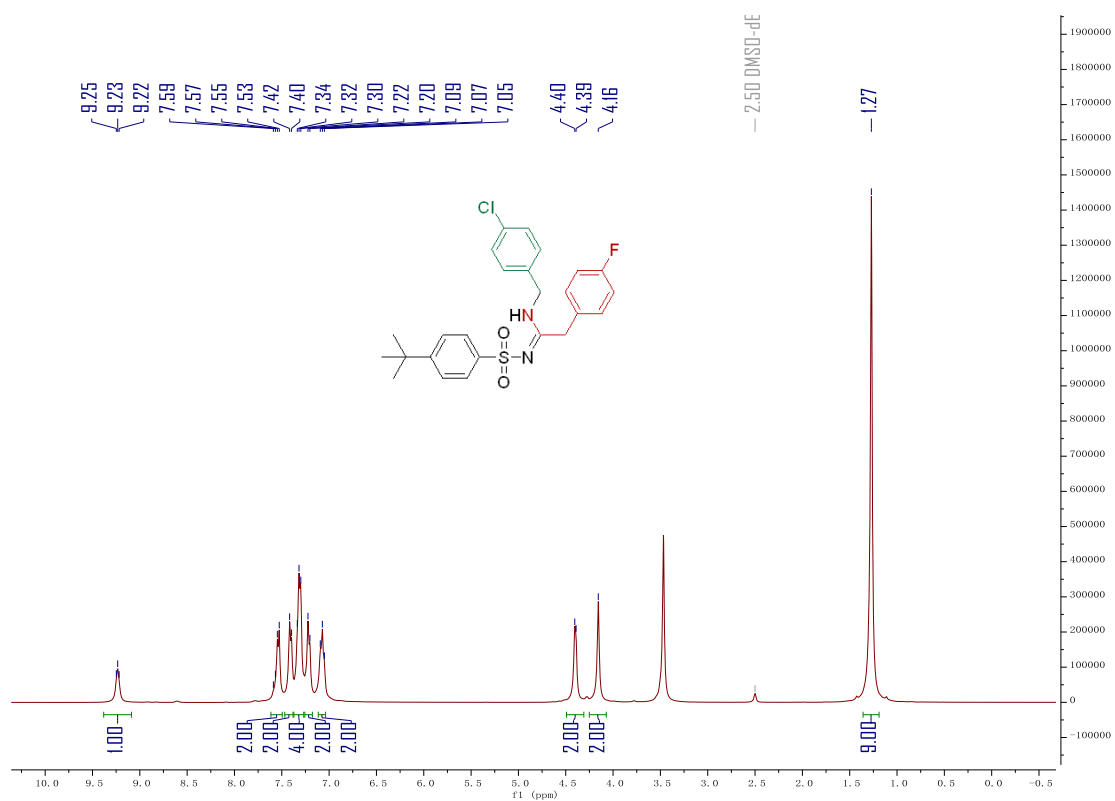

<sup>13</sup>C NMR (100 MHz, DMSO-d<sub>6</sub>) of compound **6k**

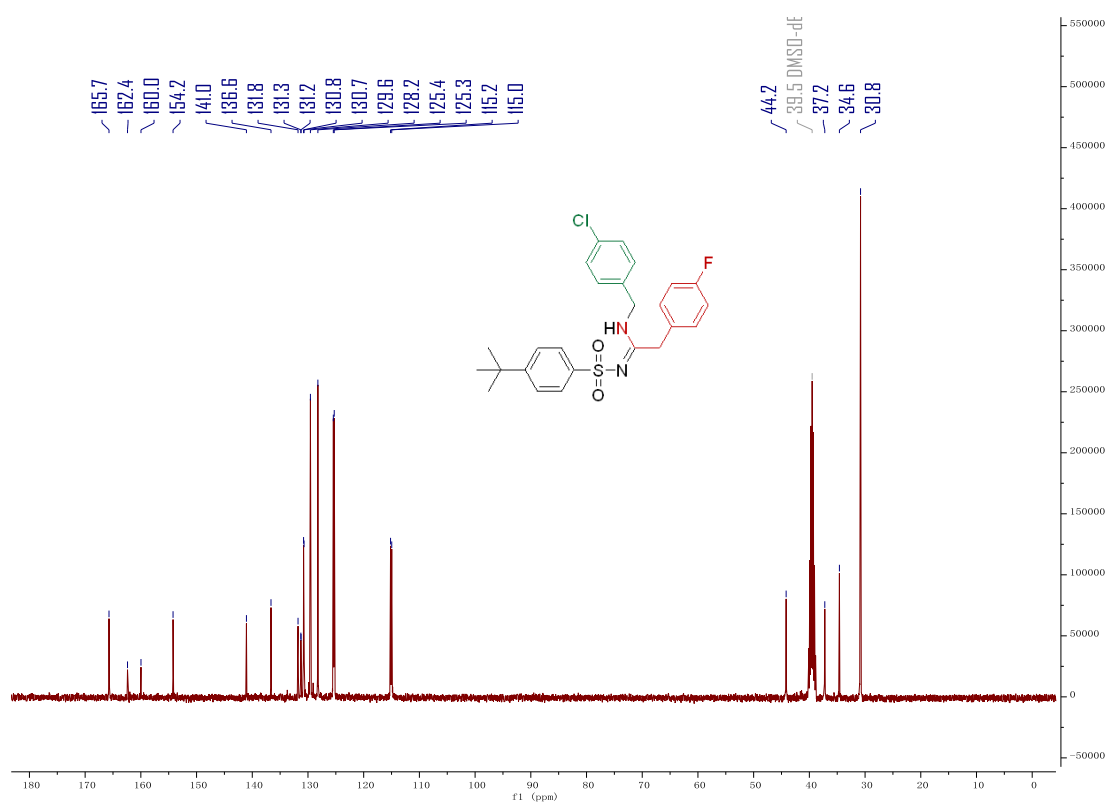

**<sup>19</sup>F NMR (376 MHz, DMSO-*d*<sub>6</sub>) of compound 6k**

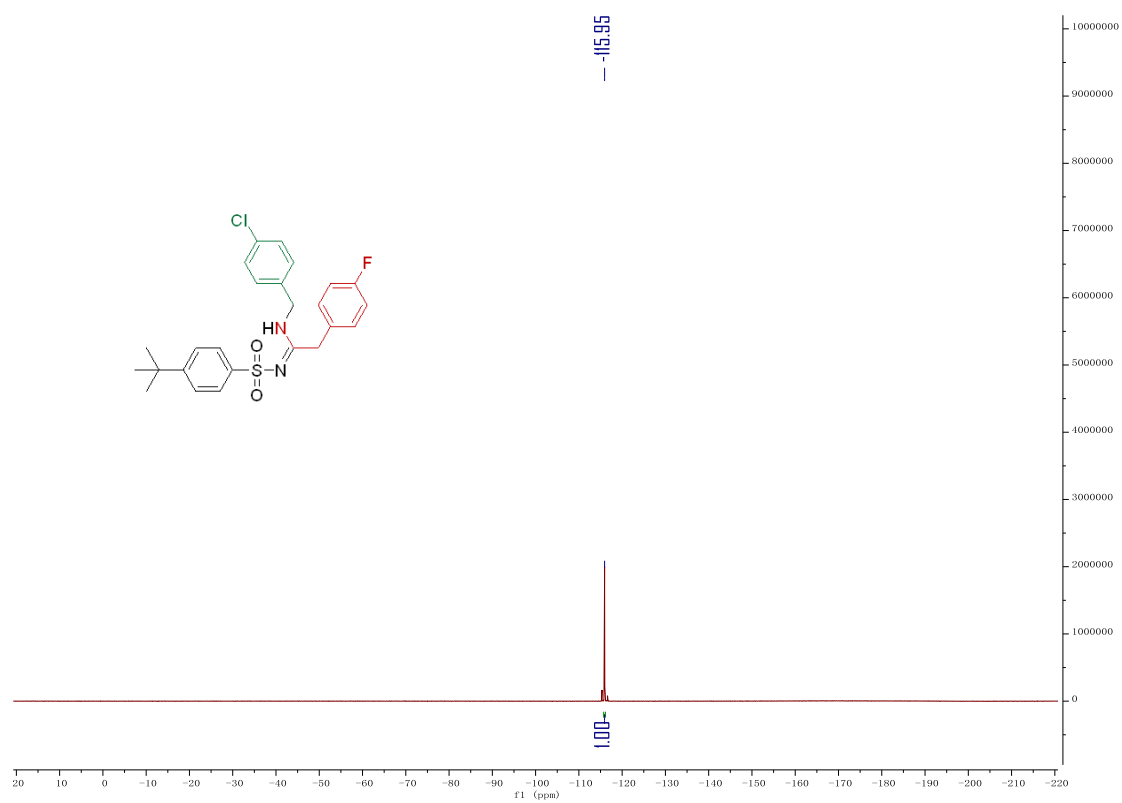

**<sup>1</sup>H NMR (400 MHz, DMSO-*d*<sub>6</sub>) of compound 6I**

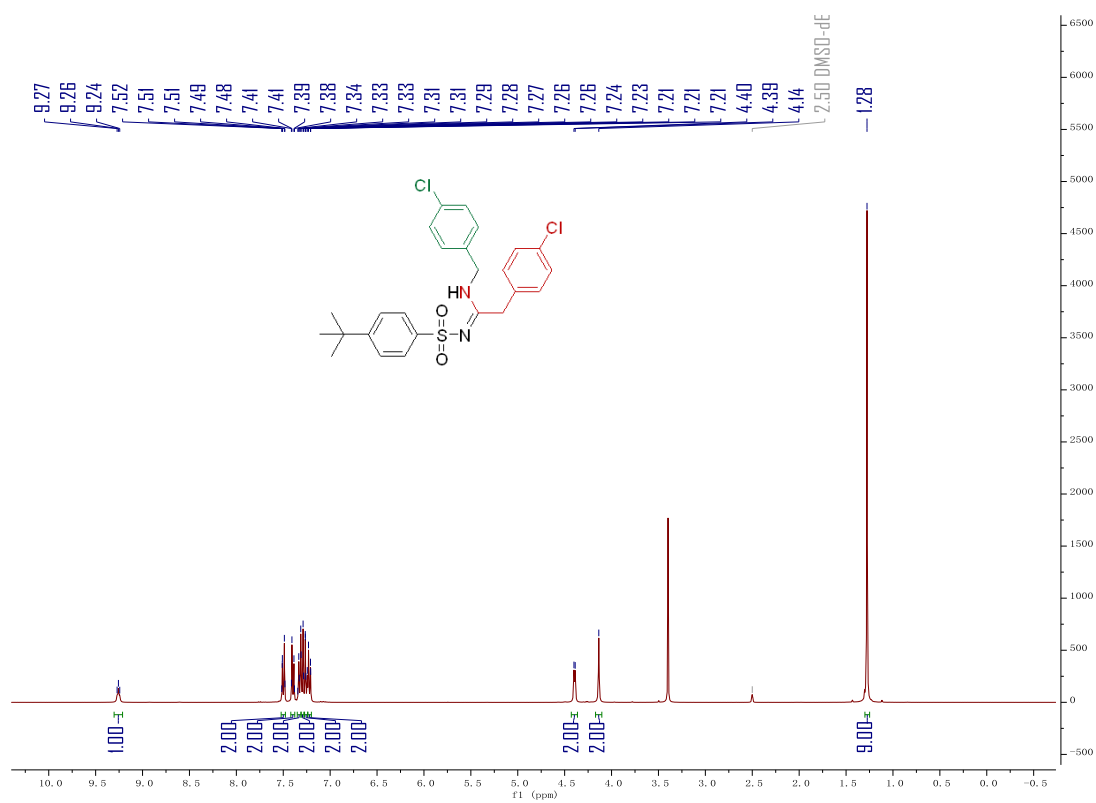

**<sup>13</sup>C NMR (100 MHz, DMSO-*d*<sub>6</sub>) of compound 6I**

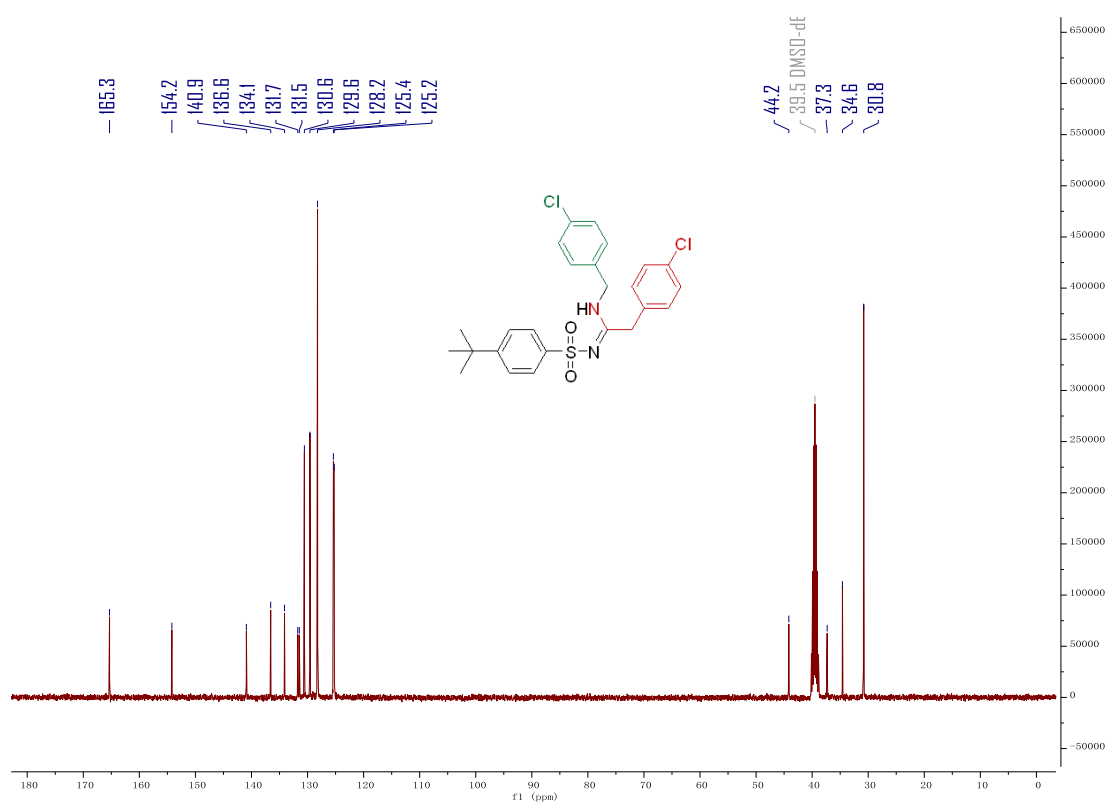

**<sup>1</sup>H NMR (400 MHz, DMSO-*d*<sub>6</sub>) of compound 6m**

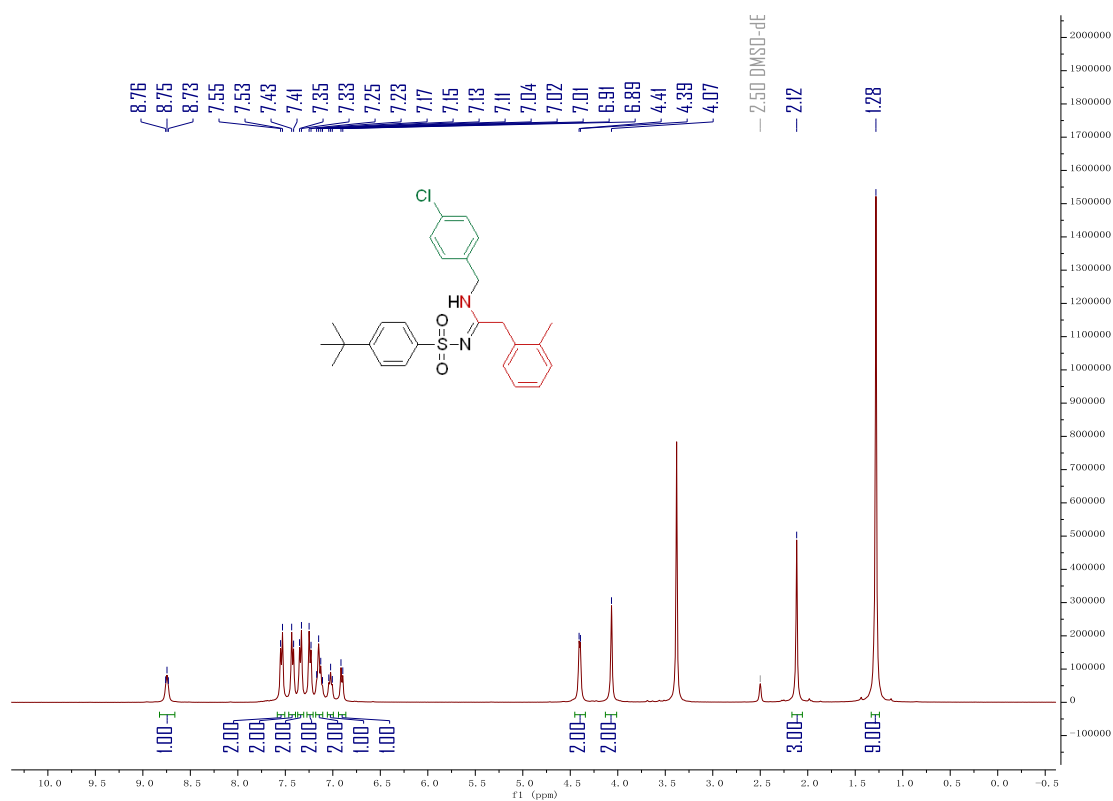

**<sup>13</sup>C NMR (100 MHz, DMSO-*d*<sub>6</sub>) of compound 6m**

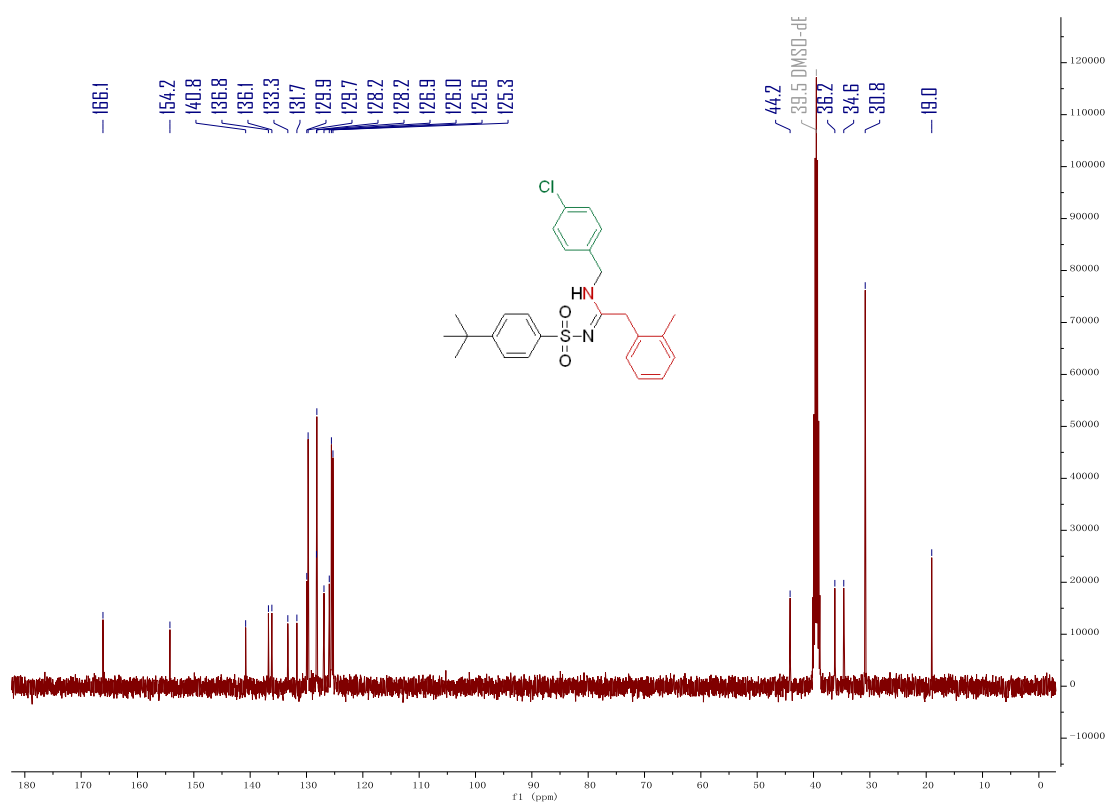

**<sup>1</sup>H NMR (400 MHz, DMSO-*d*<sub>6</sub>) of compound 6n**

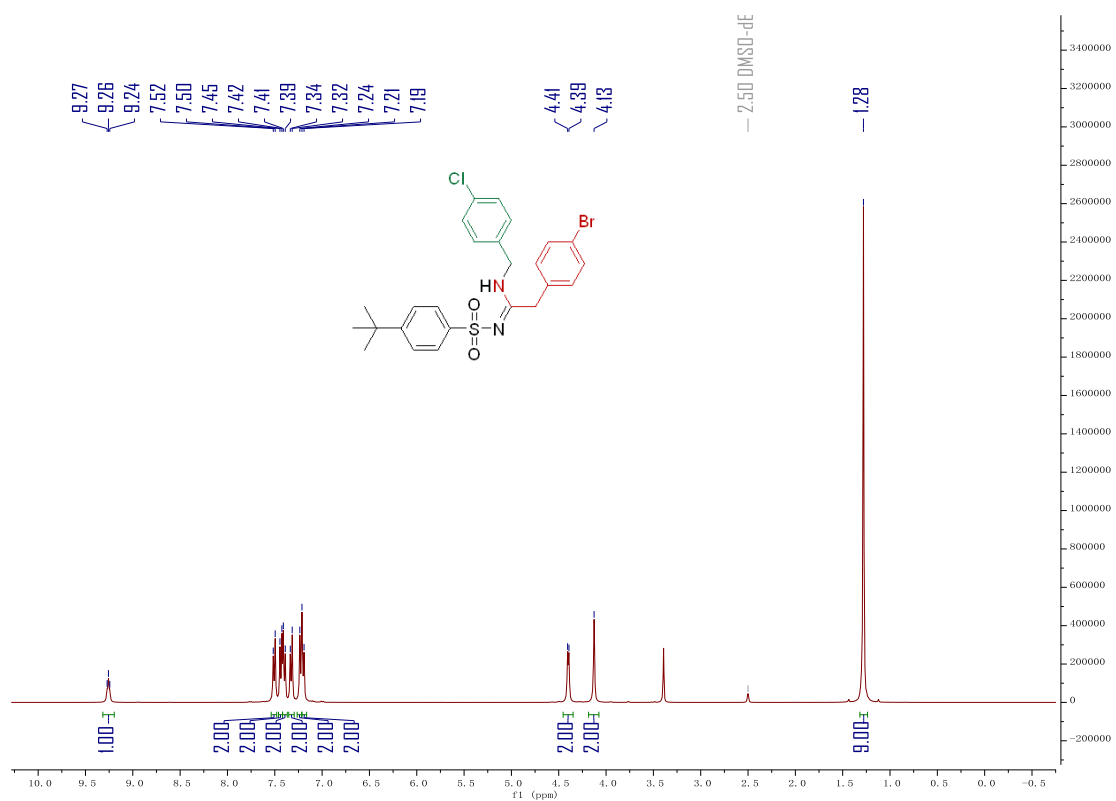

**<sup>13</sup>C NMR (100 MHz, DMSO-*d*<sub>6</sub>) of compound 6n**

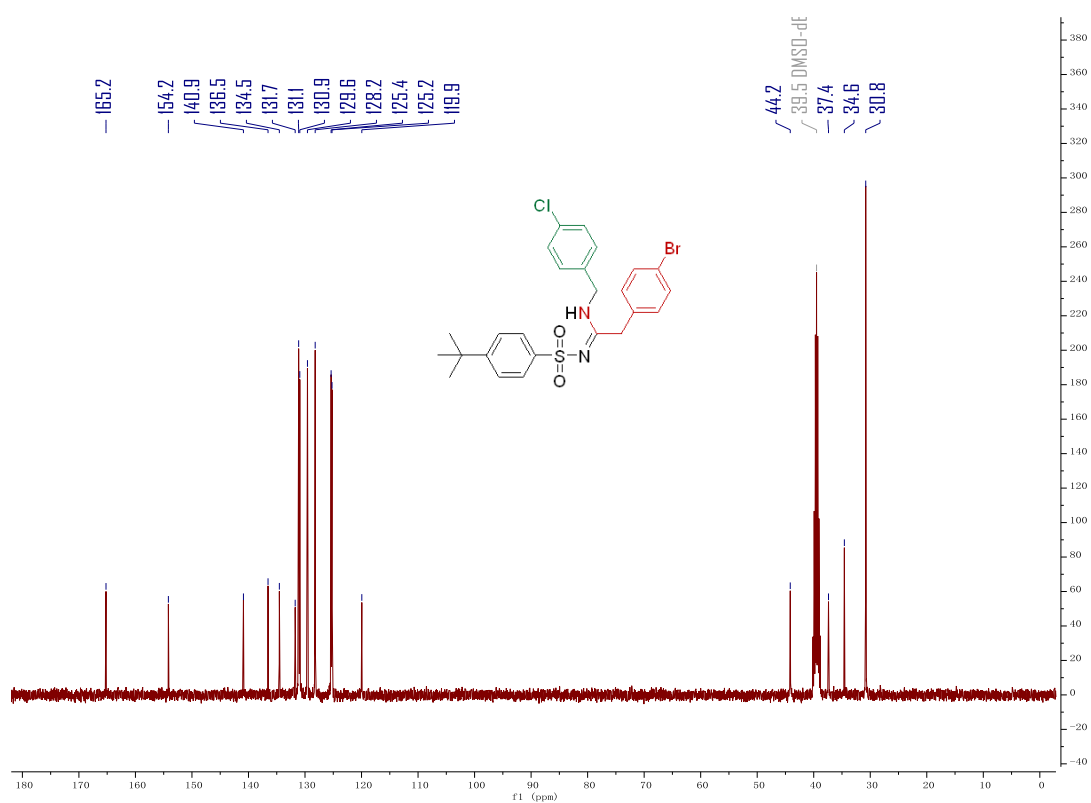

$^1\text{H}$  NMR (400 MHz,  $\text{DMSO-}d_6$ ) of compound **60**

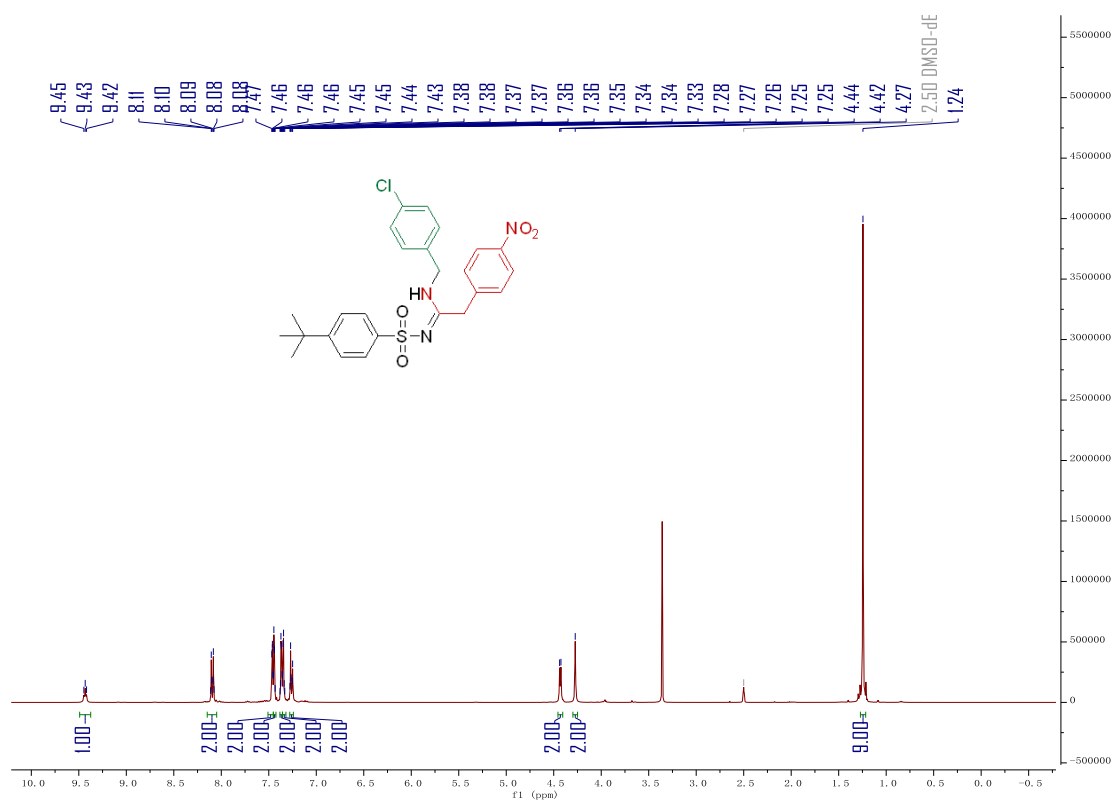

$^{13}\text{C}$  NMR (100 MHz,  $\text{DMSO-}d_6$ ) of compound **60**

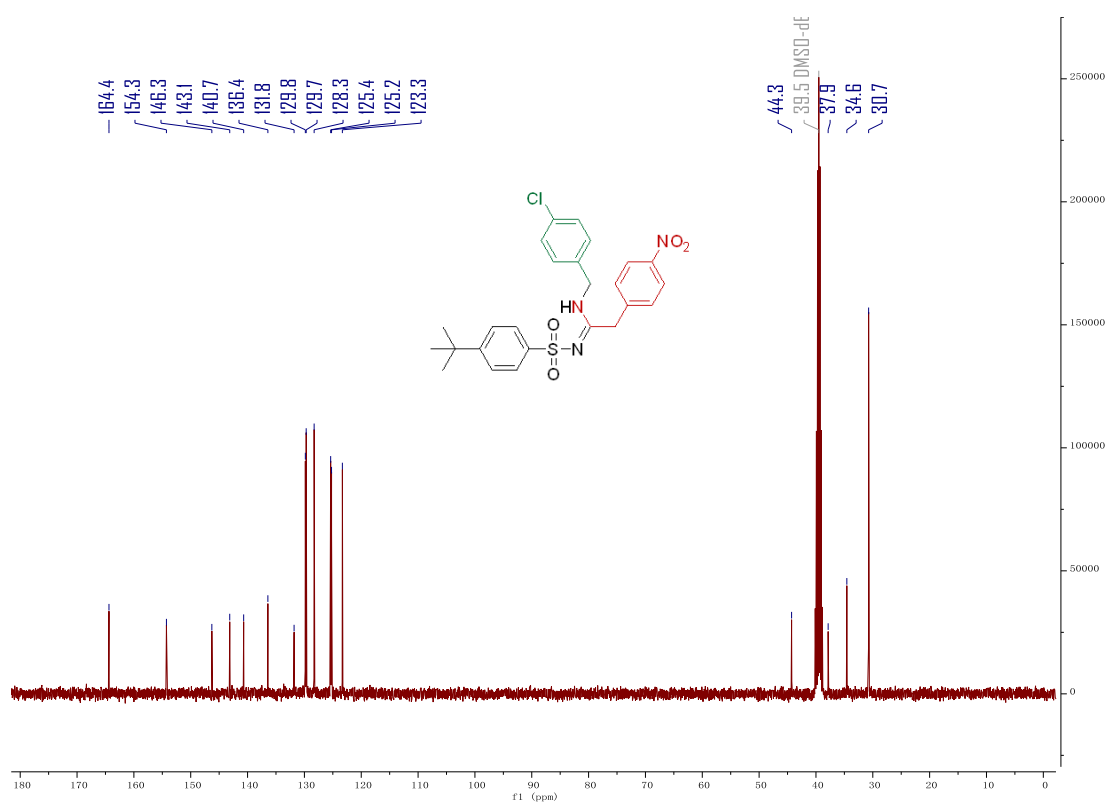

**<sup>1</sup>H NMR (400 MHz, DMSO-*d*<sub>6</sub>) of compound 6p**

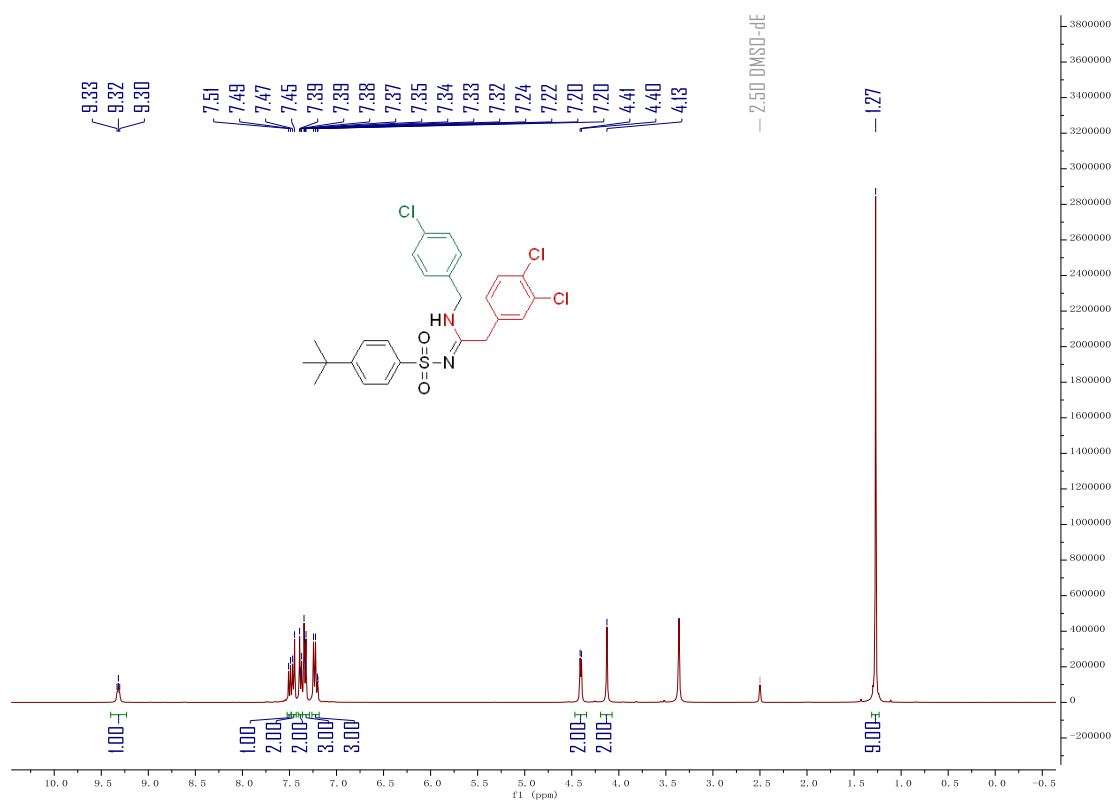

**<sup>13</sup>C NMR (100 MHz, DMSO-*d*<sub>6</sub>) of compound 6p**

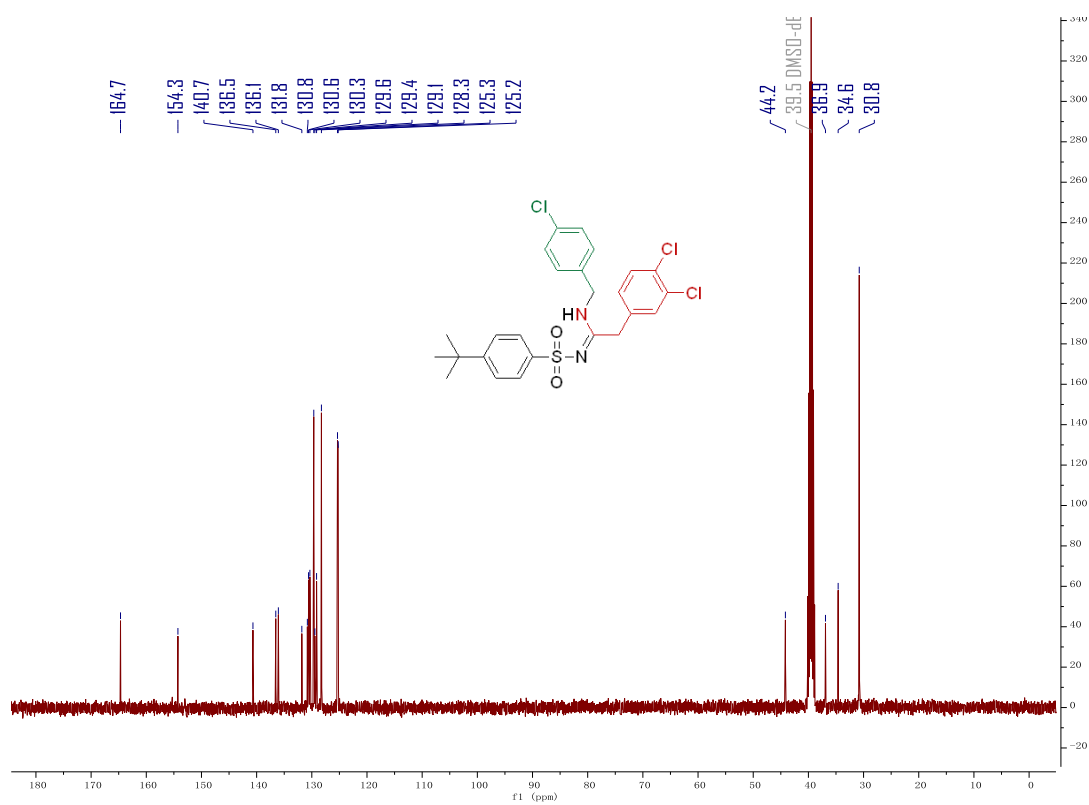

<sup>1</sup>H NMR (400 MHz, DMSO-d<sub>6</sub>) of compound **6q**

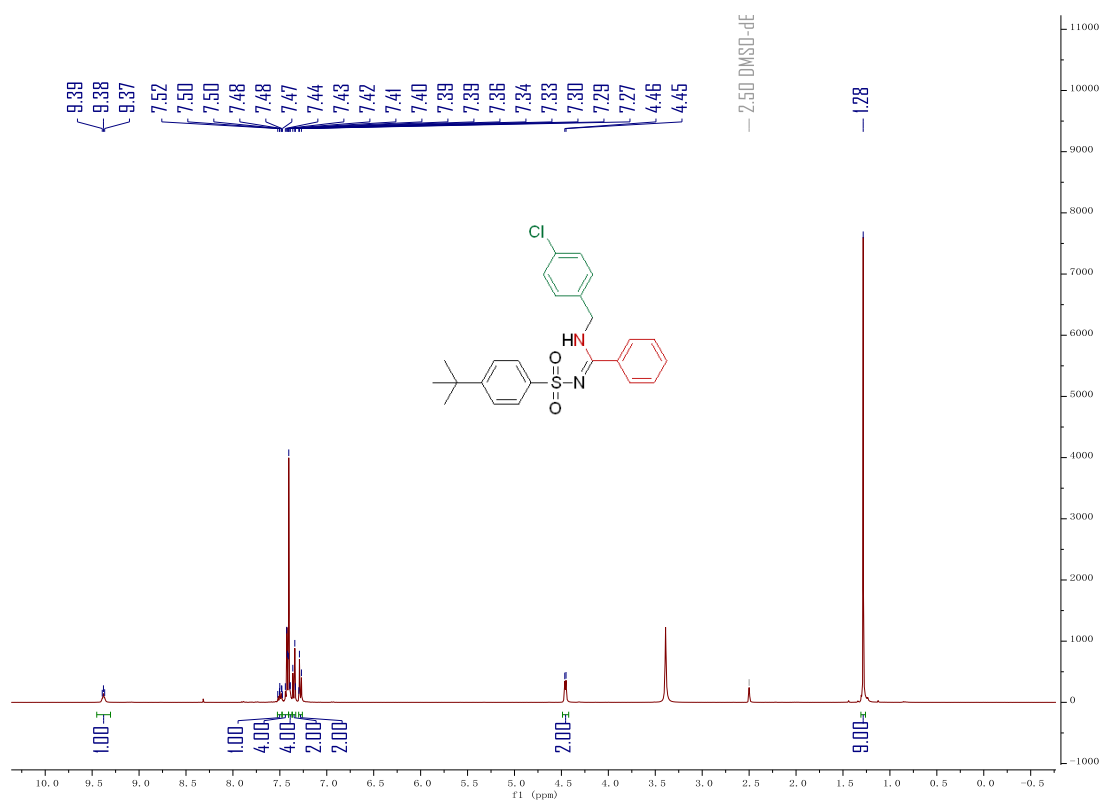

<sup>13</sup>C NMR (100 MHz, DMSO-d<sub>6</sub>) of compound **6q**

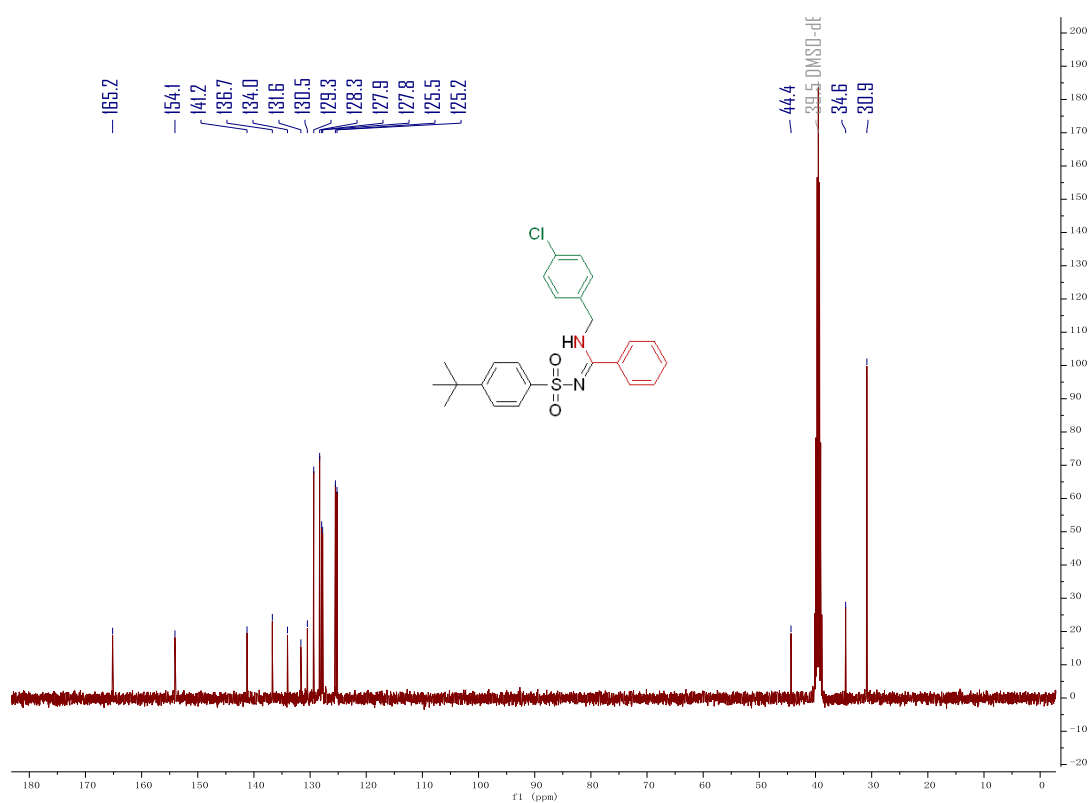



**<sup>1</sup>H NMR (400 MHz, DMSO-*d*<sub>6</sub>) of compound 7a**

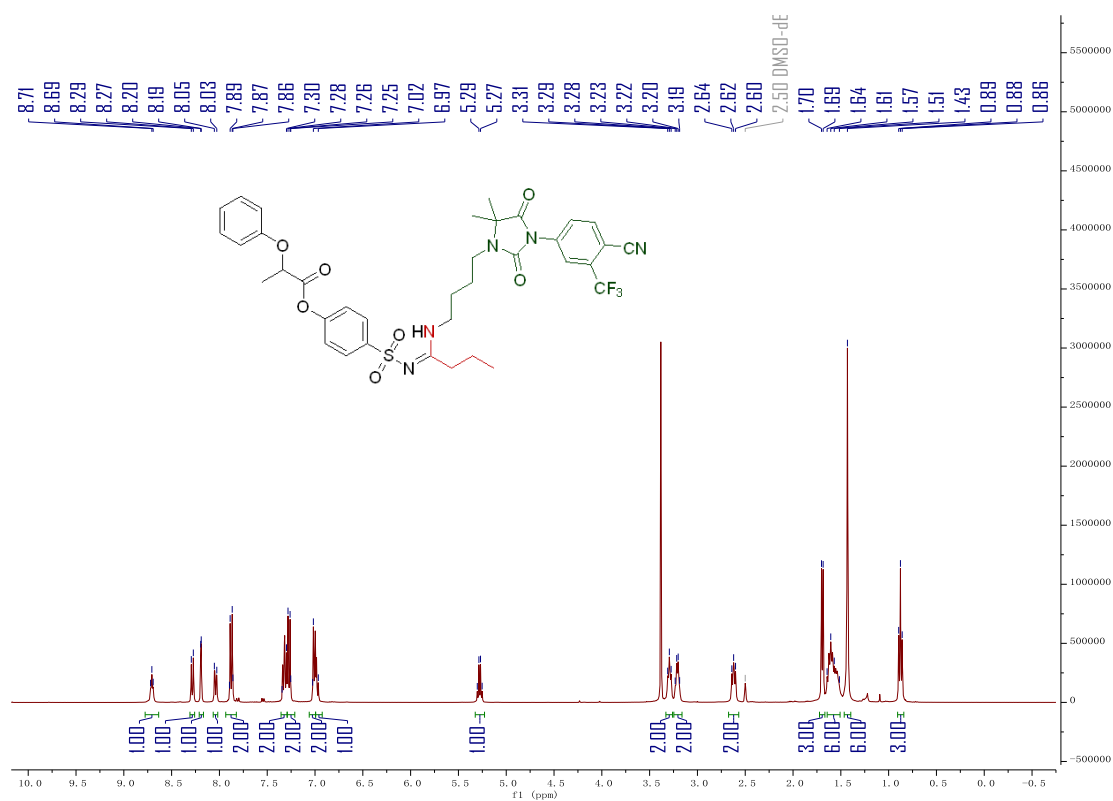

**<sup>13</sup>C NMR (100 MHz, DMSO-*d*<sub>6</sub>) of compound 7a**

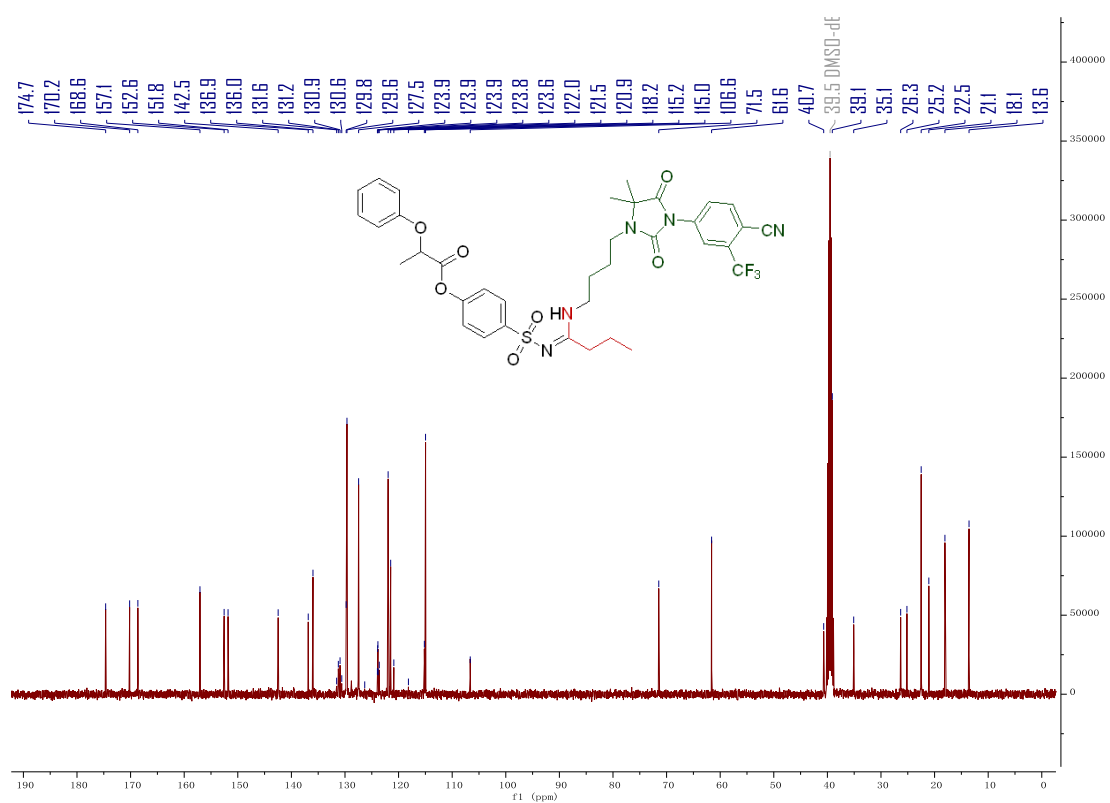

**<sup>19</sup>F NMR (376 MHz, DMSO-*d*<sub>6</sub>) of compound 7a**

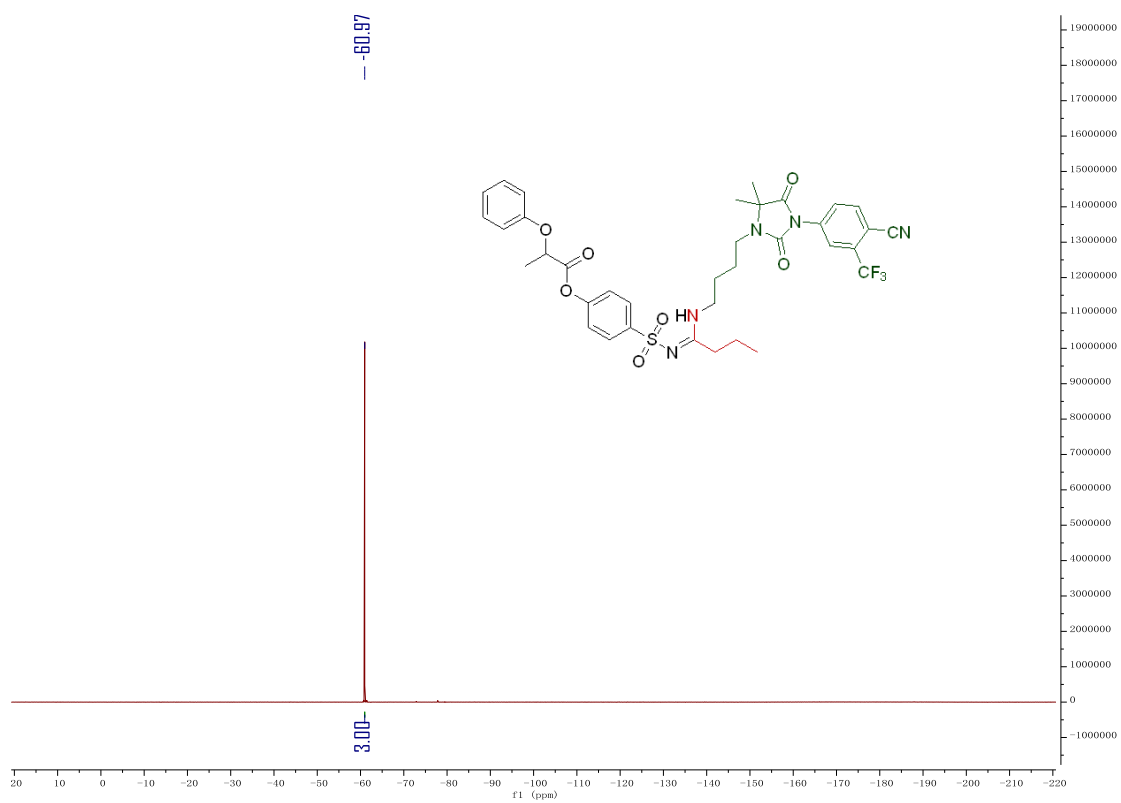

**<sup>1</sup>H NMR (400 MHz, DMSO-*d*<sub>6</sub>) of compound 7b**

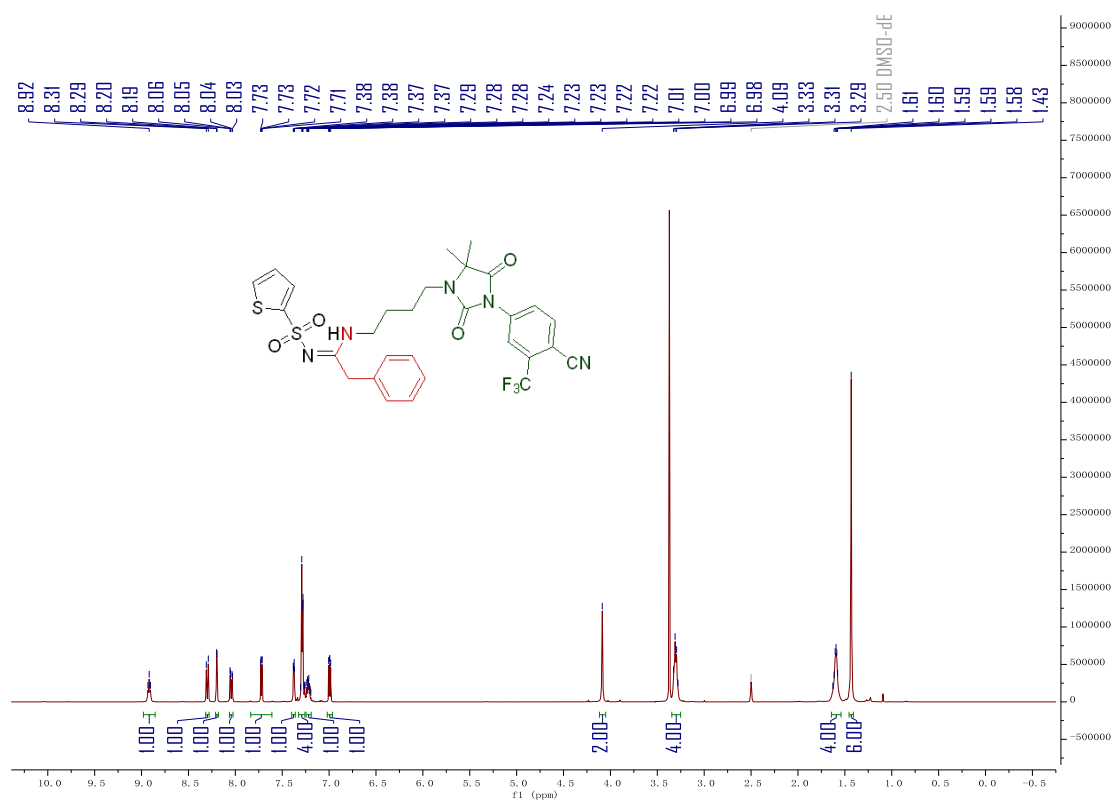

**<sup>13</sup>C NMR (100 MHz, DMSO-*d*<sub>6</sub>) of compound 7b**

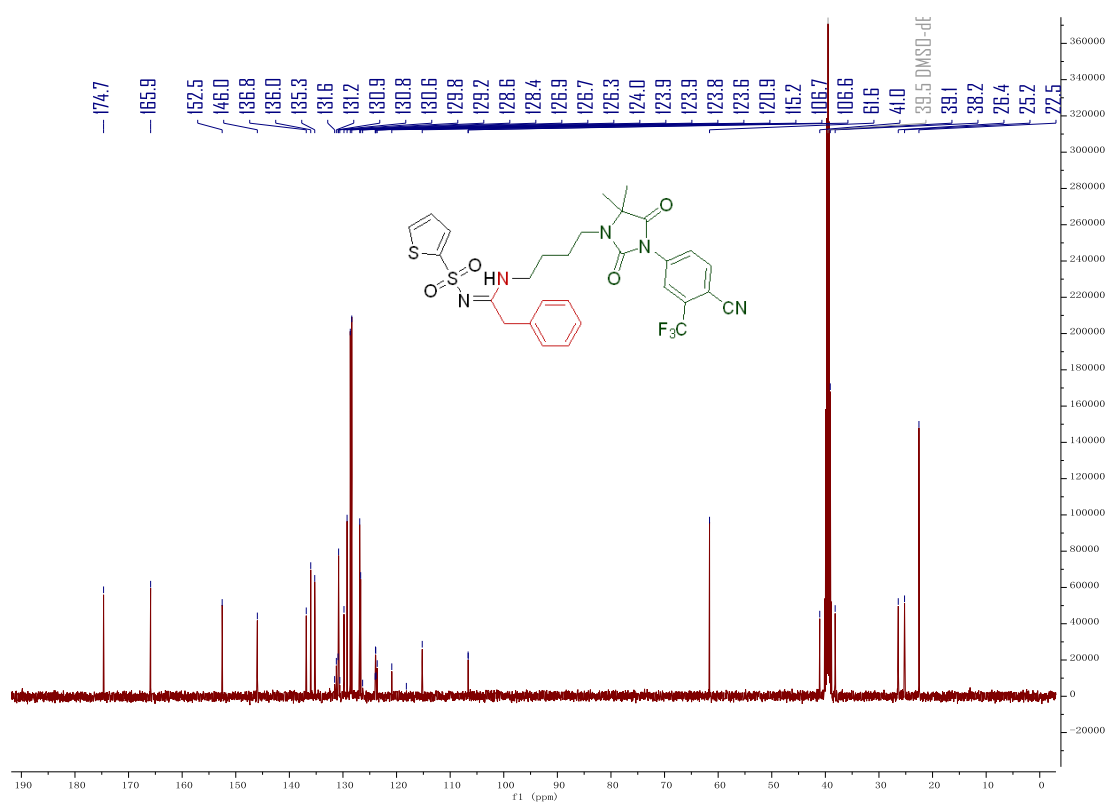

**<sup>19</sup>F NMR (376 MHz, DMSO-*d*<sub>6</sub>) of compound 7b**

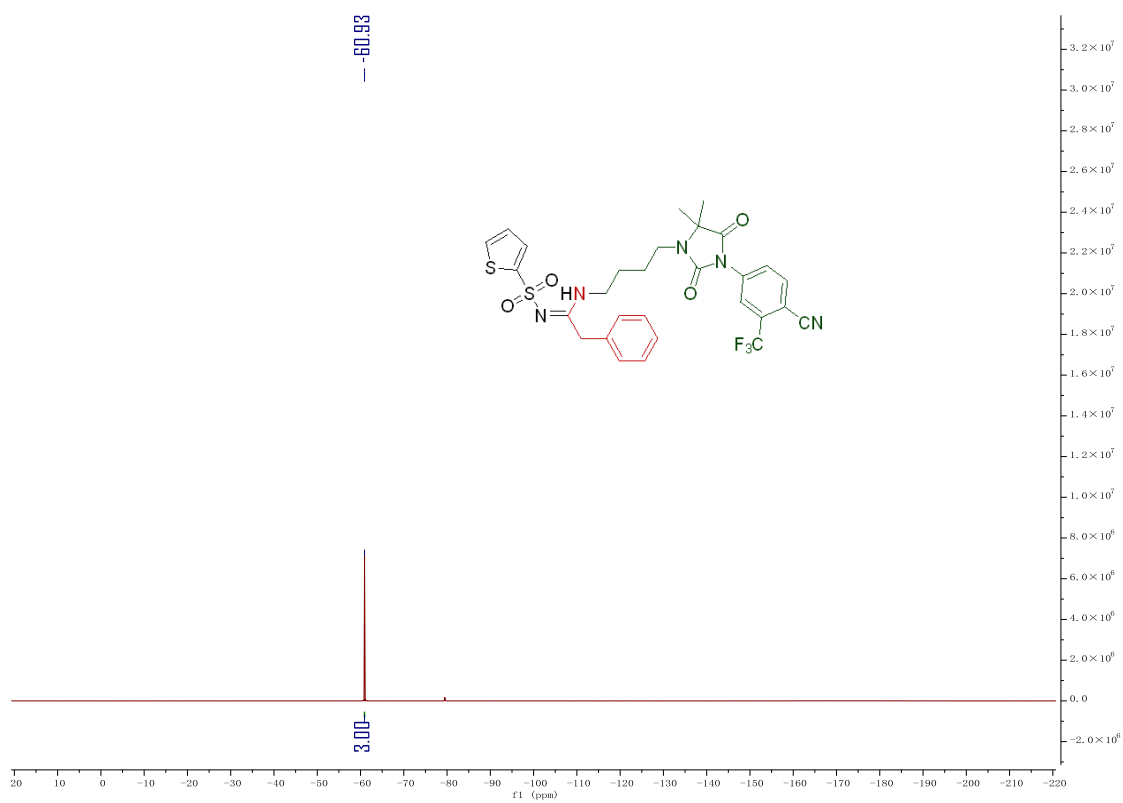

<sup>1</sup>H NMR (400 MHz, DMSO-d<sub>6</sub>) of compound 7c

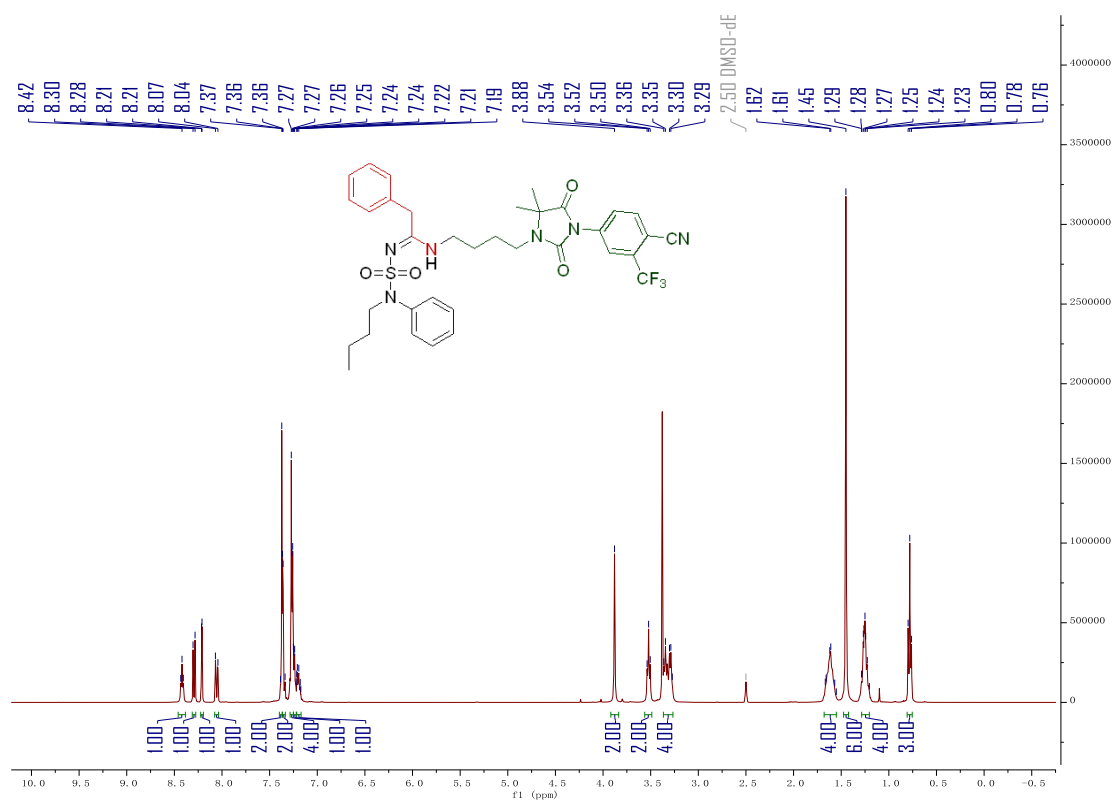

<sup>13</sup>C NMR (100 MHz, DMSO-d<sub>6</sub>) of compound 7c

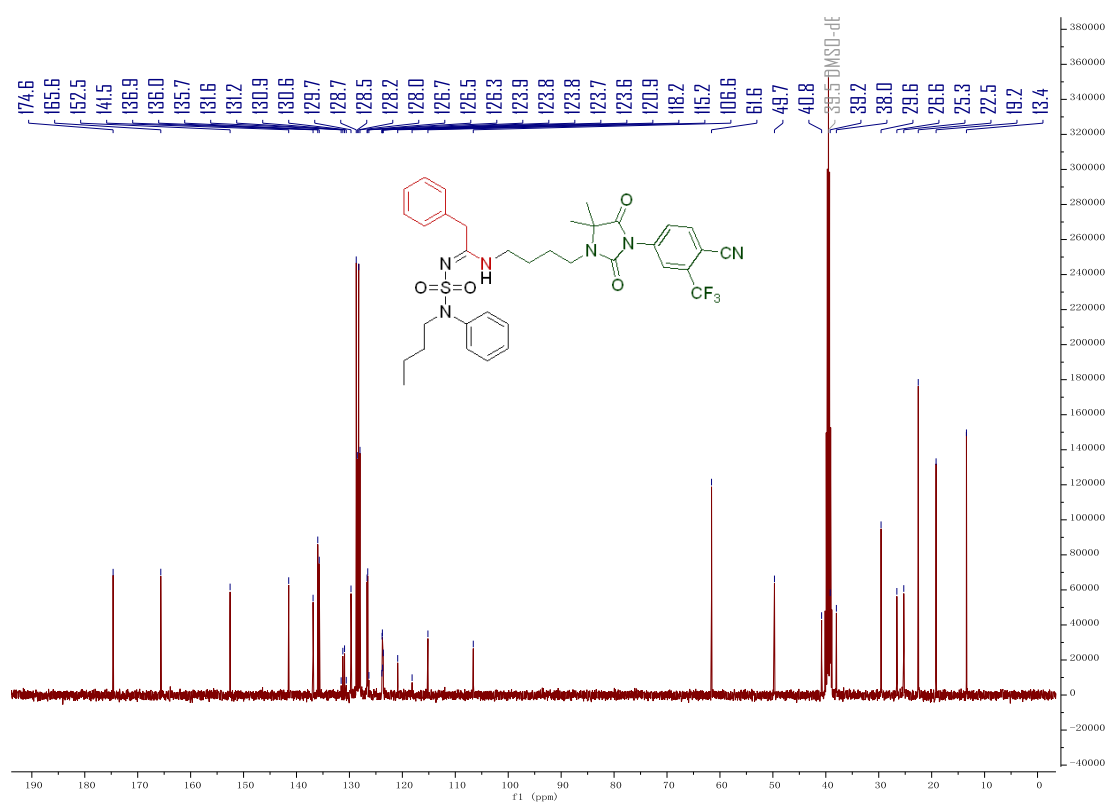

**<sup>19</sup>F NMR (376 MHz, DMSO-*d*<sub>6</sub>) of compound 7c**

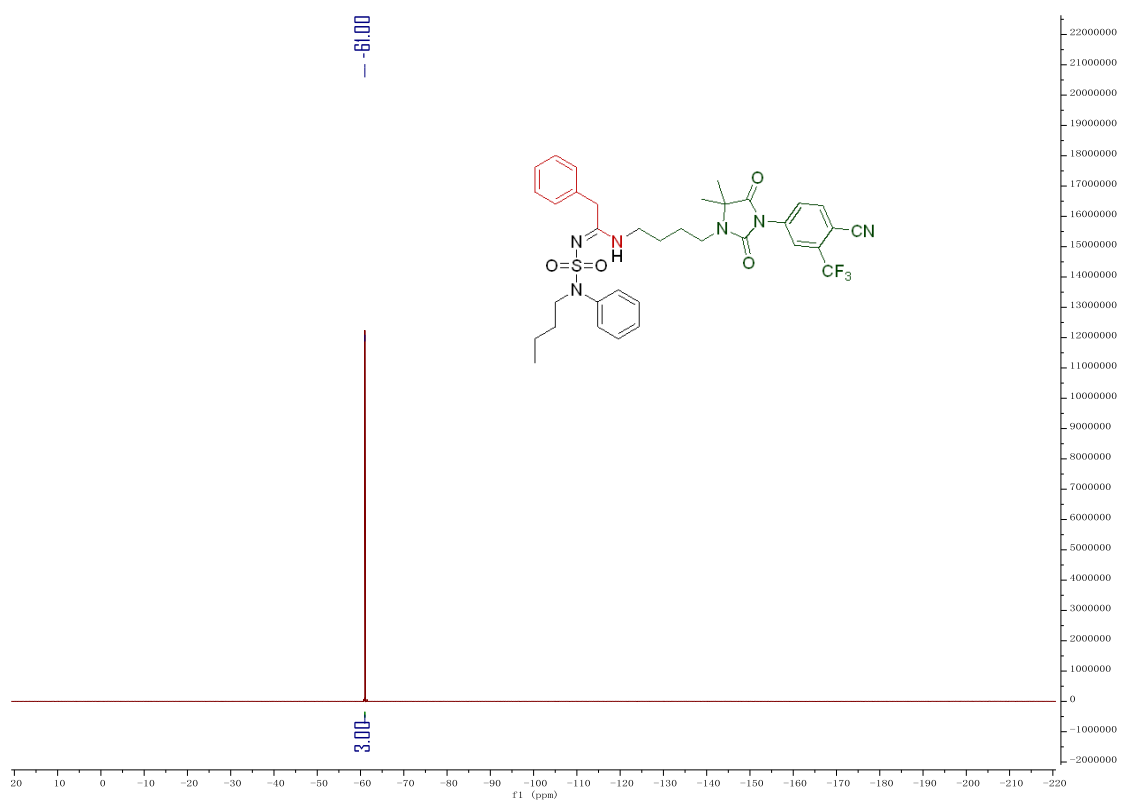

**<sup>1</sup>H NMR (400 MHz, DMSO-*d*<sub>6</sub>) of compound 7d**

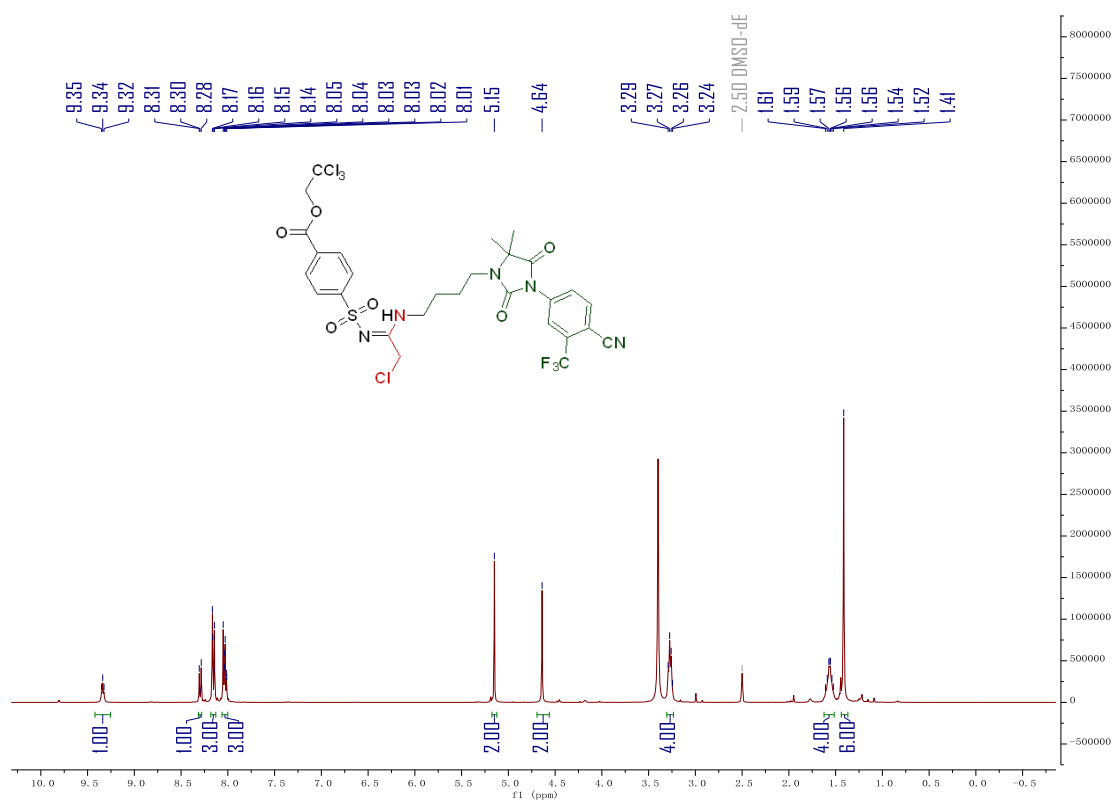

**<sup>13</sup>C NMR (100 MHz, DMSO-*d*<sub>6</sub>) of compound 7d**

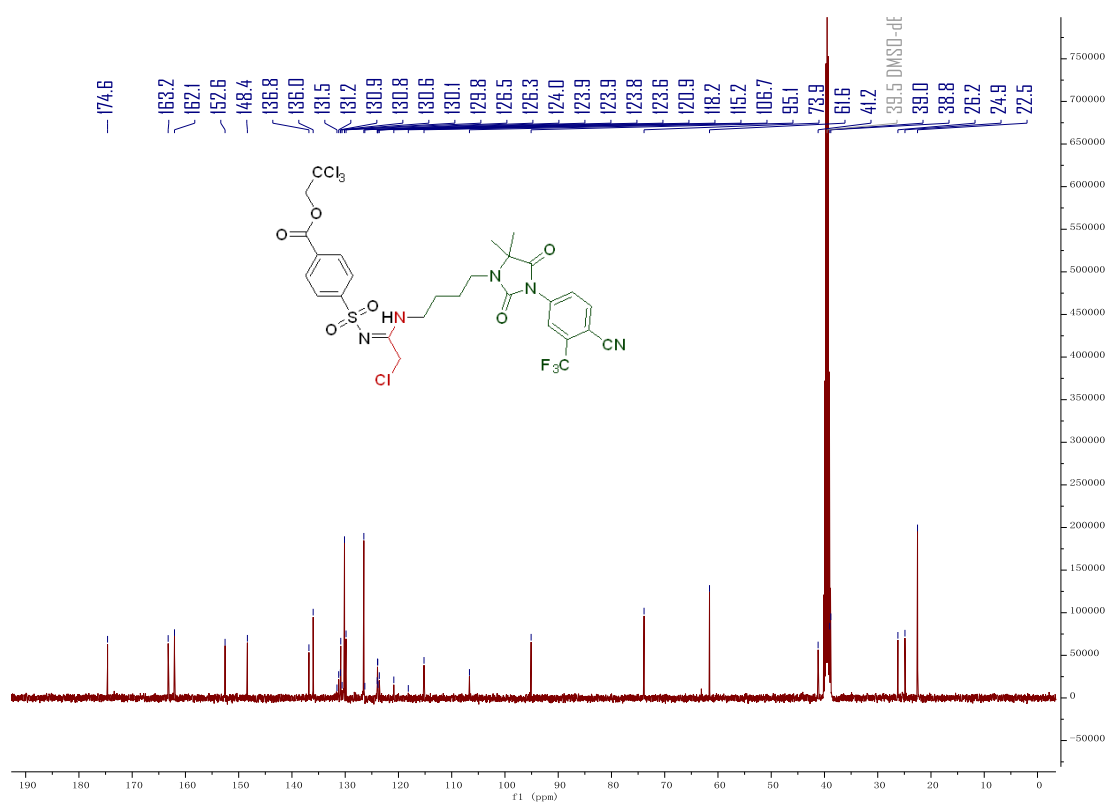

**<sup>19</sup>F NMR (376 MHz, DMSO-*d*<sub>6</sub>) of compound 7d**

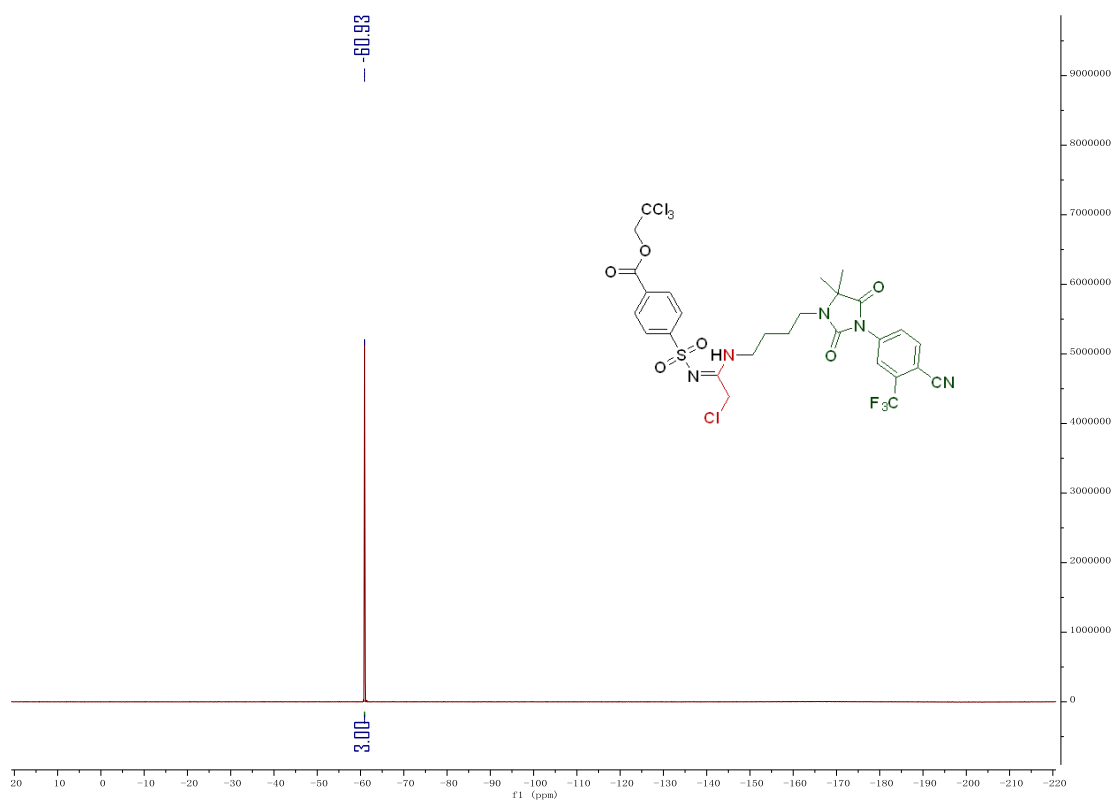



<sup>1</sup>H NMR (400 MHz, DMSO-d<sub>6</sub>) of compound 7e

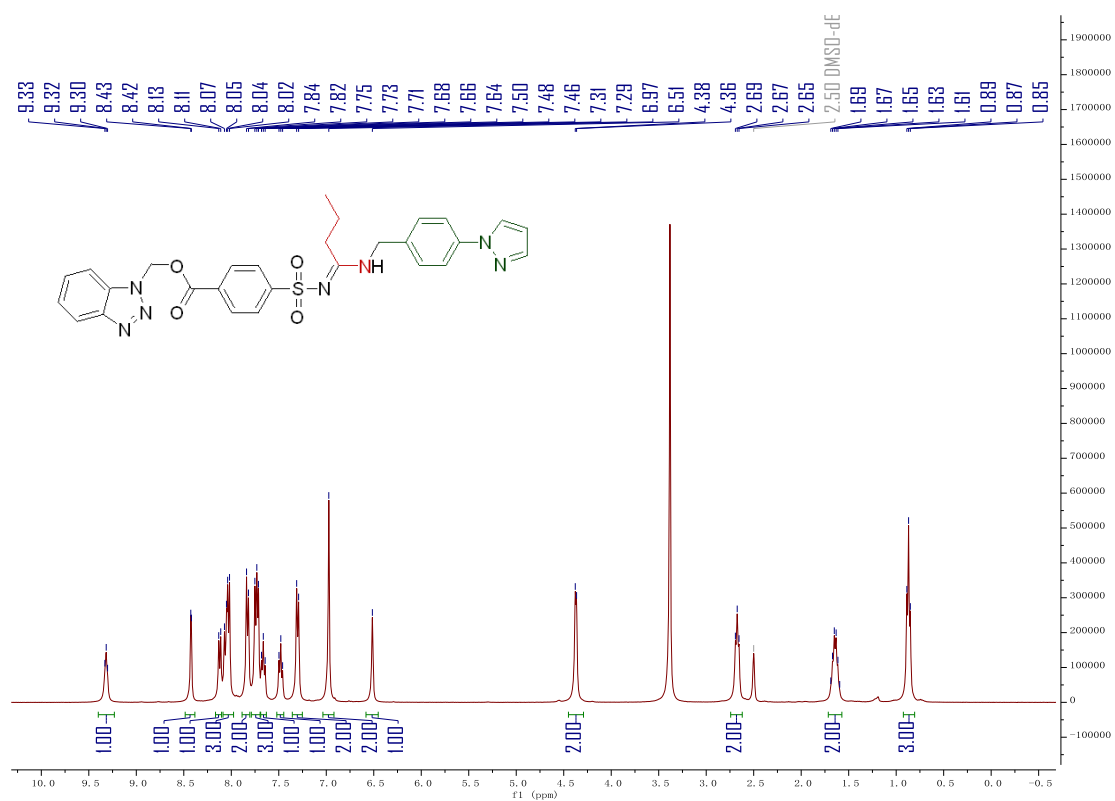

<sup>13</sup>C NMR (100 MHz, DMSO-d<sub>6</sub>) of compound 7e

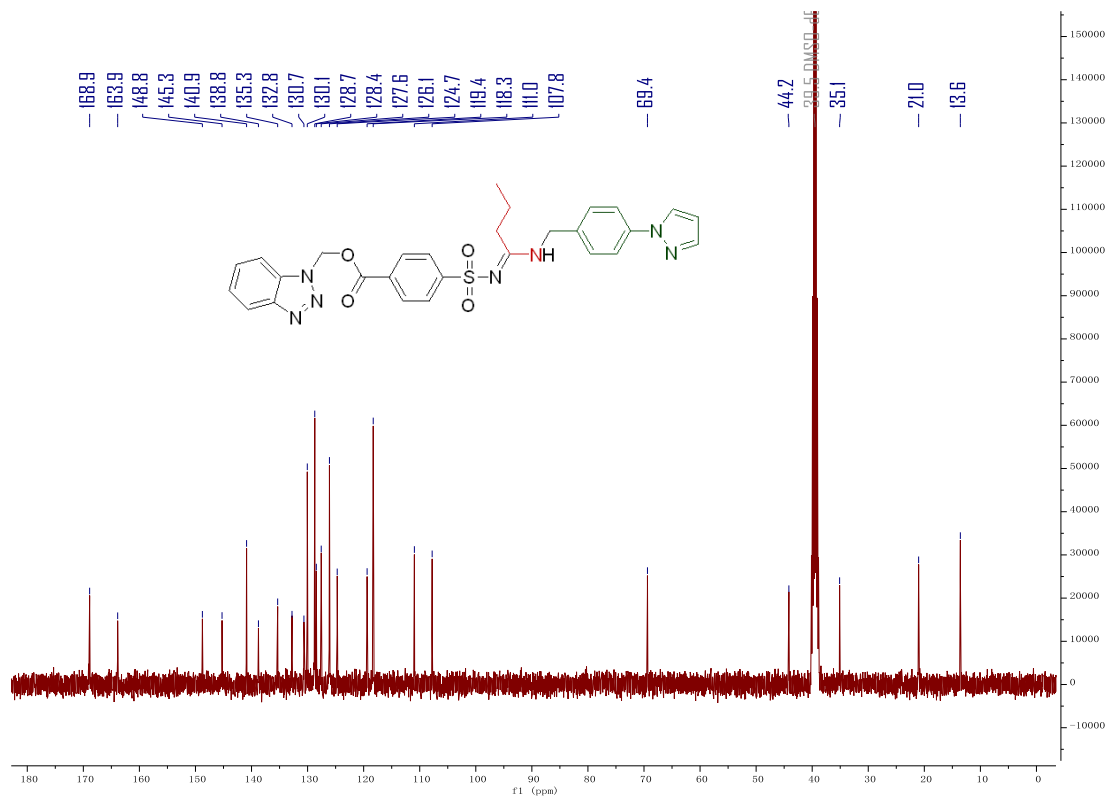

**<sup>1</sup>H NMR (400 MHz, DMSO-*d*<sub>6</sub>) of compound 7f**

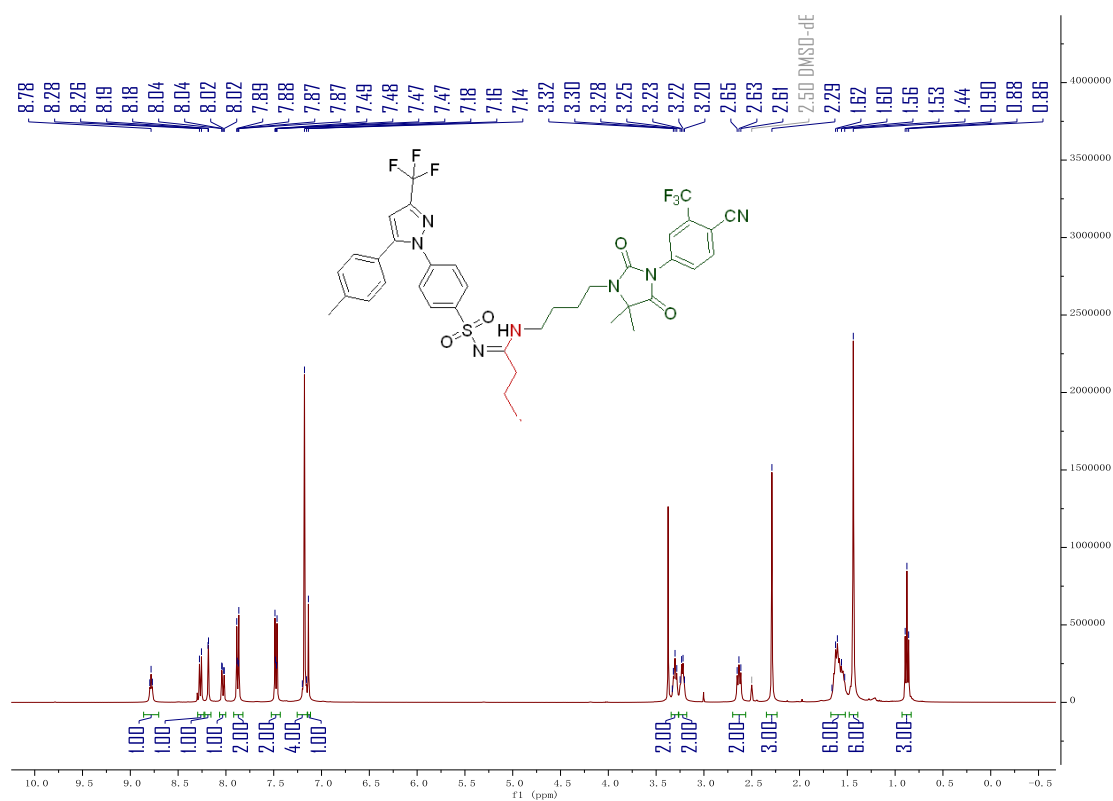

**<sup>13</sup>C NMR (100 MHz, DMSO-*d*<sub>6</sub>) of compound 7f**

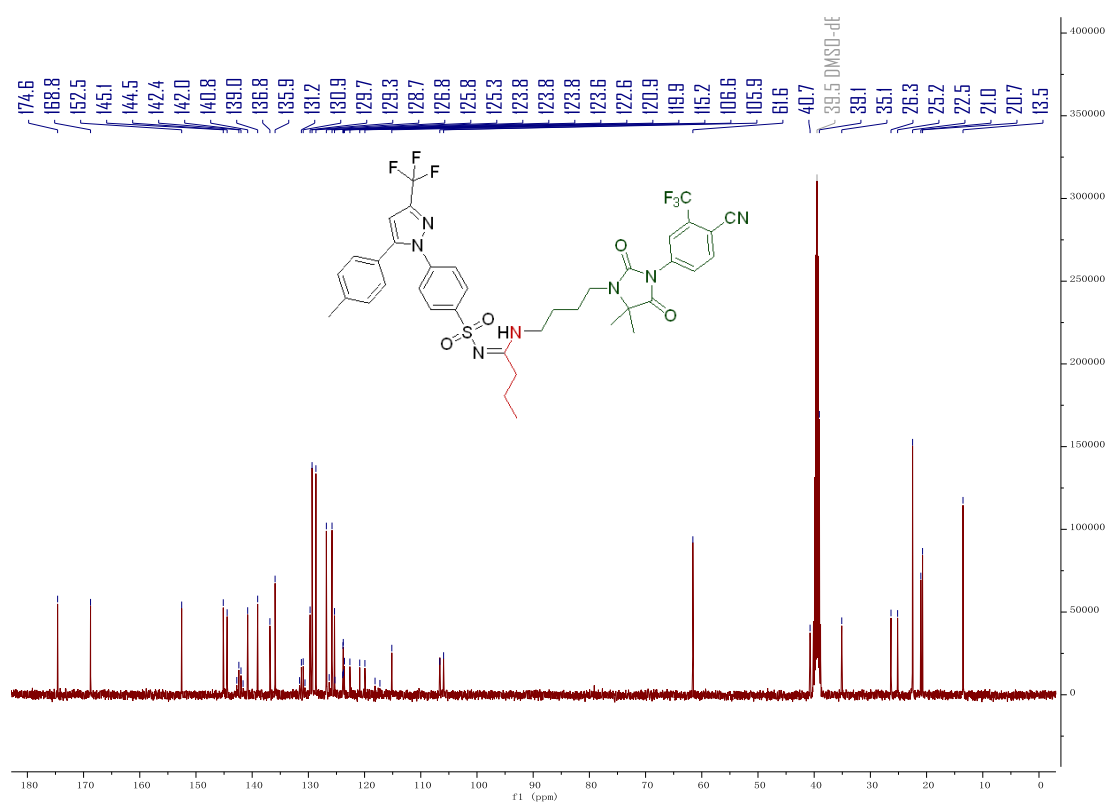

<sup>19</sup>F NMR (376 MHz, DMSO-d<sub>6</sub>) of compound 7f

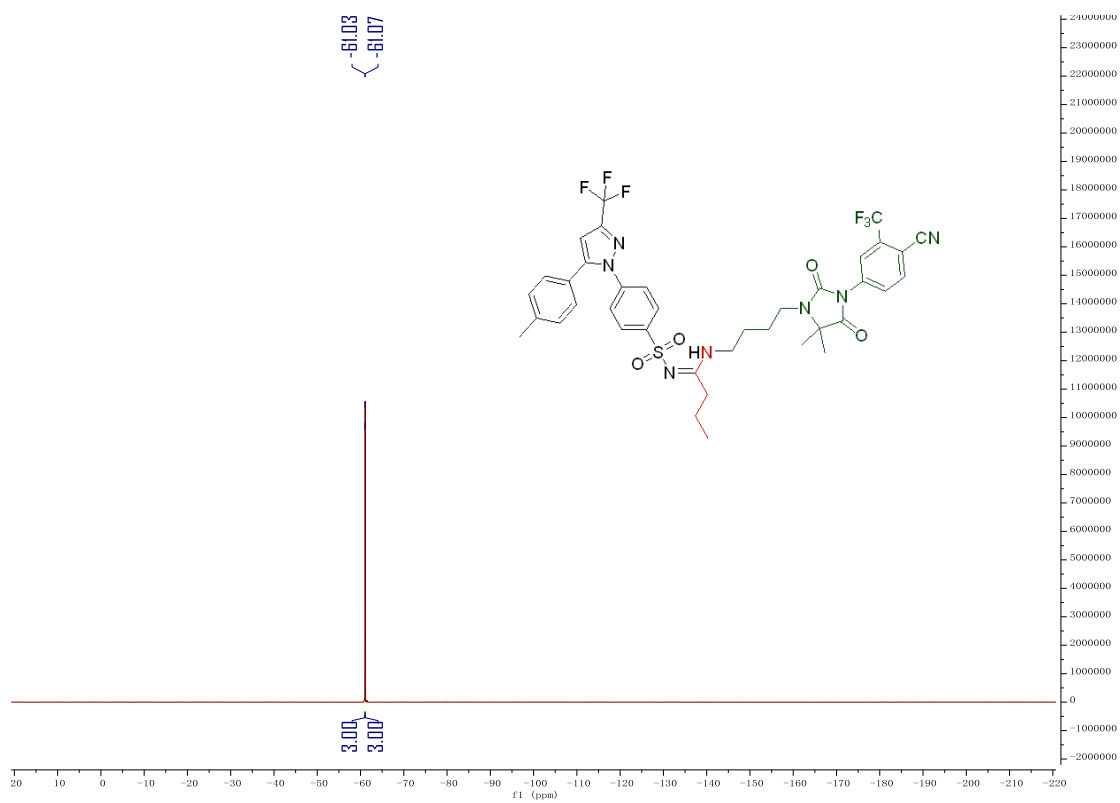

**<sup>1</sup>H NMR (400 MHz, DMSO-*d*<sub>6</sub>) of compound 7g**

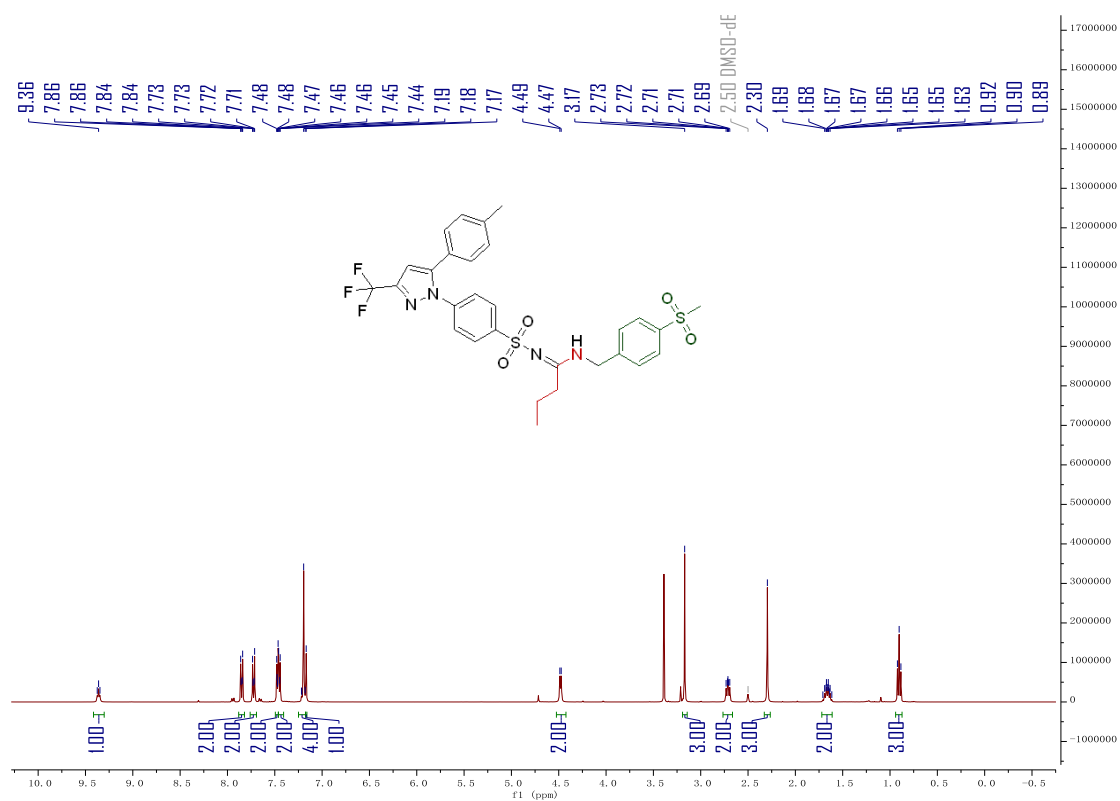

**<sup>13</sup>C NMR (100 MHz, DMSO-*d*<sub>6</sub>) of compound 7g**

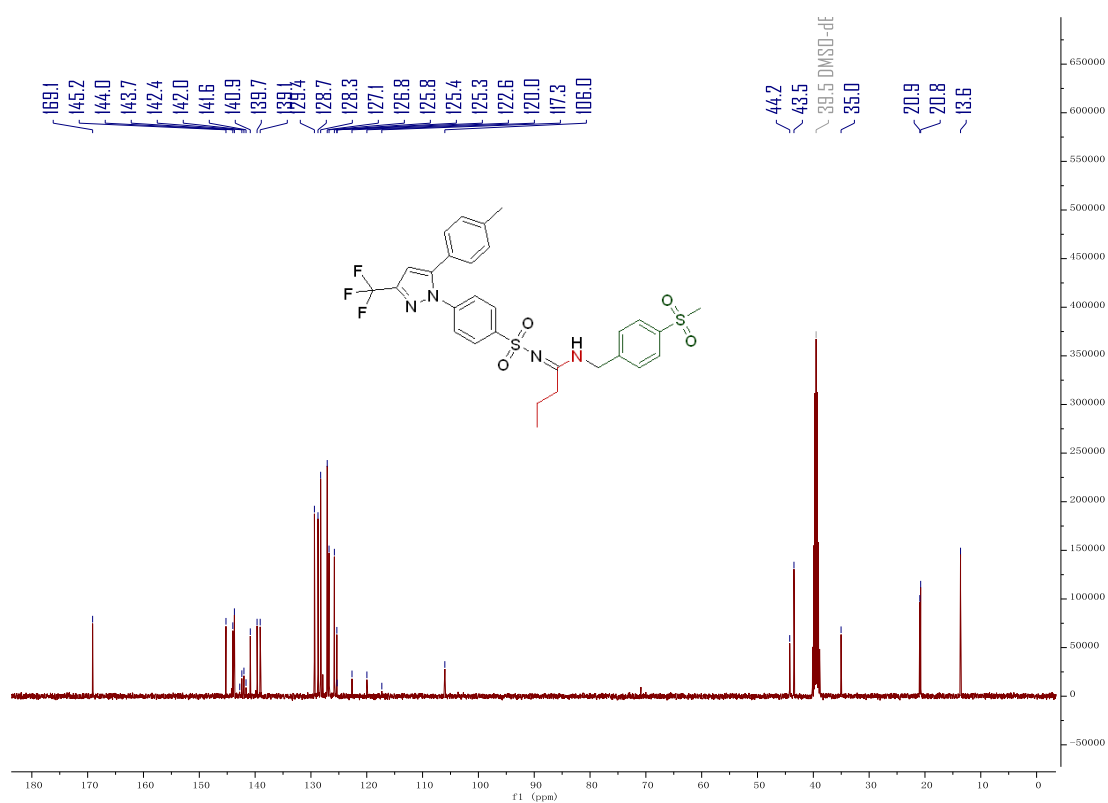



**<sup>1</sup>H NMR (400 MHz, DMSO-*d*<sub>6</sub>) of compound 7h**

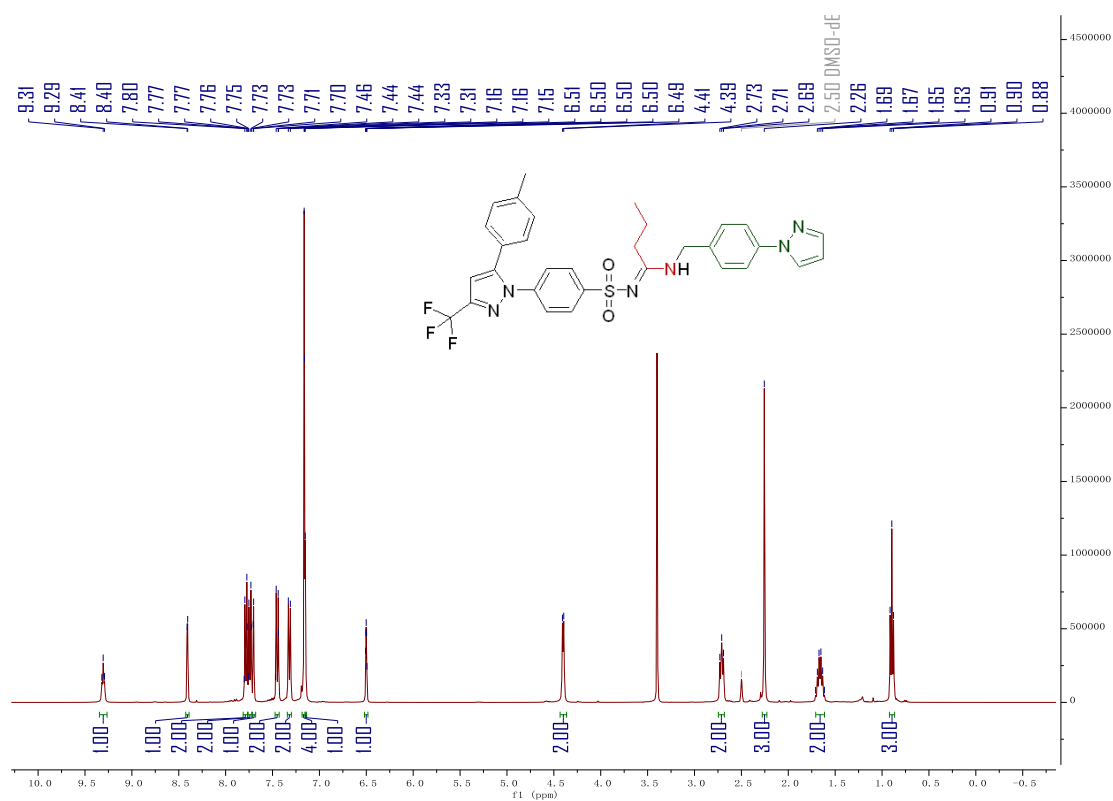

**<sup>13</sup>C NMR (100 MHz, DMSO-*d*<sub>6</sub>) of compound 7h**

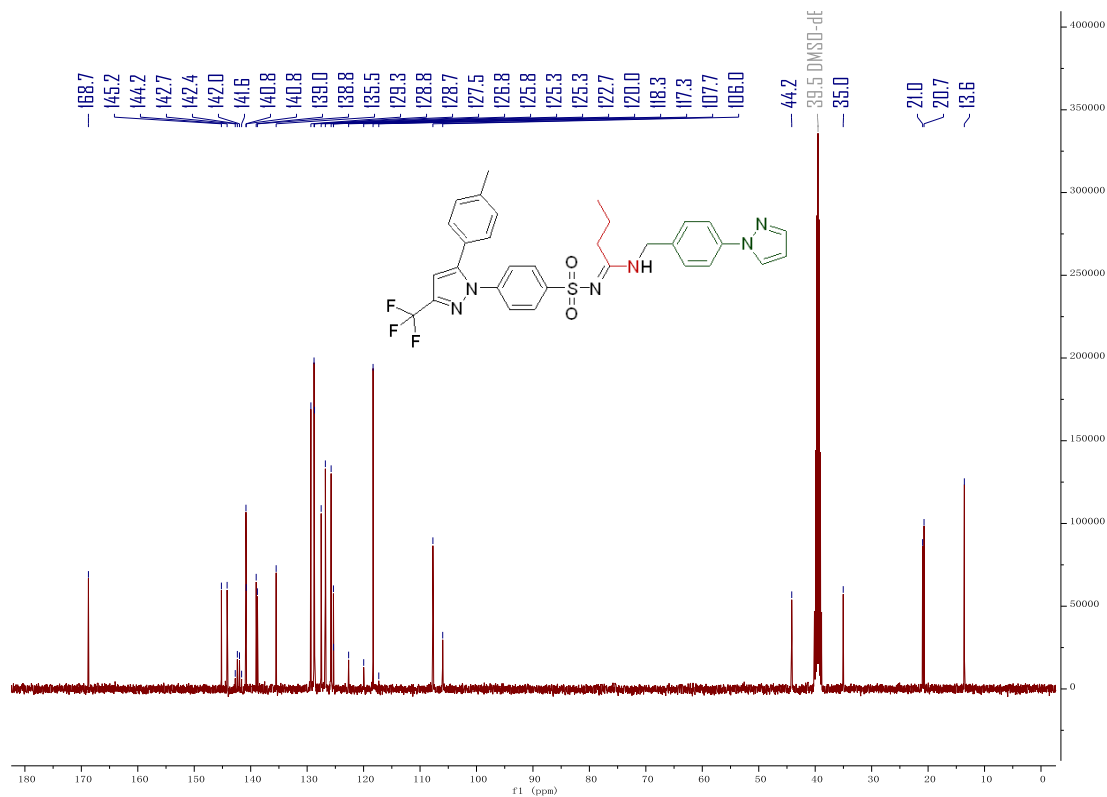

**<sup>19</sup>F NMR (376 MHz, DMSO-*d*<sub>6</sub>) of compound 7h**

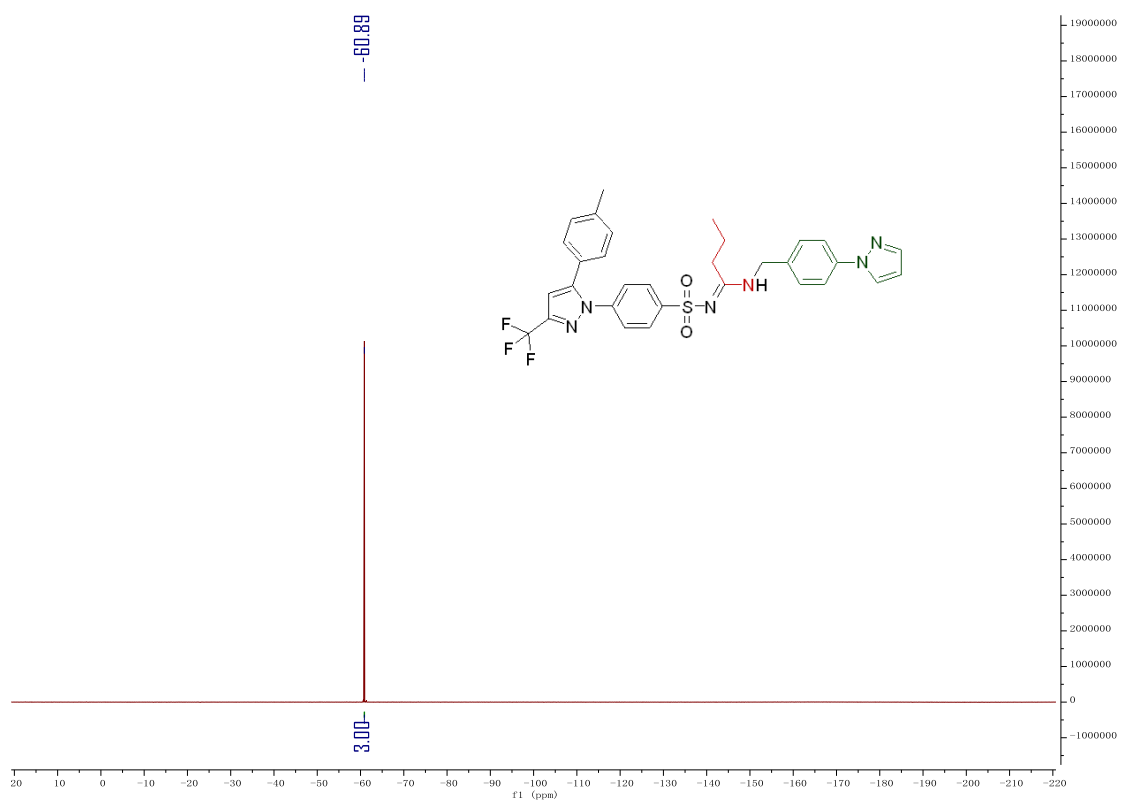

**<sup>1</sup>H NMR (400 MHz, DMSO-*d*<sub>6</sub>) of compound 7i**

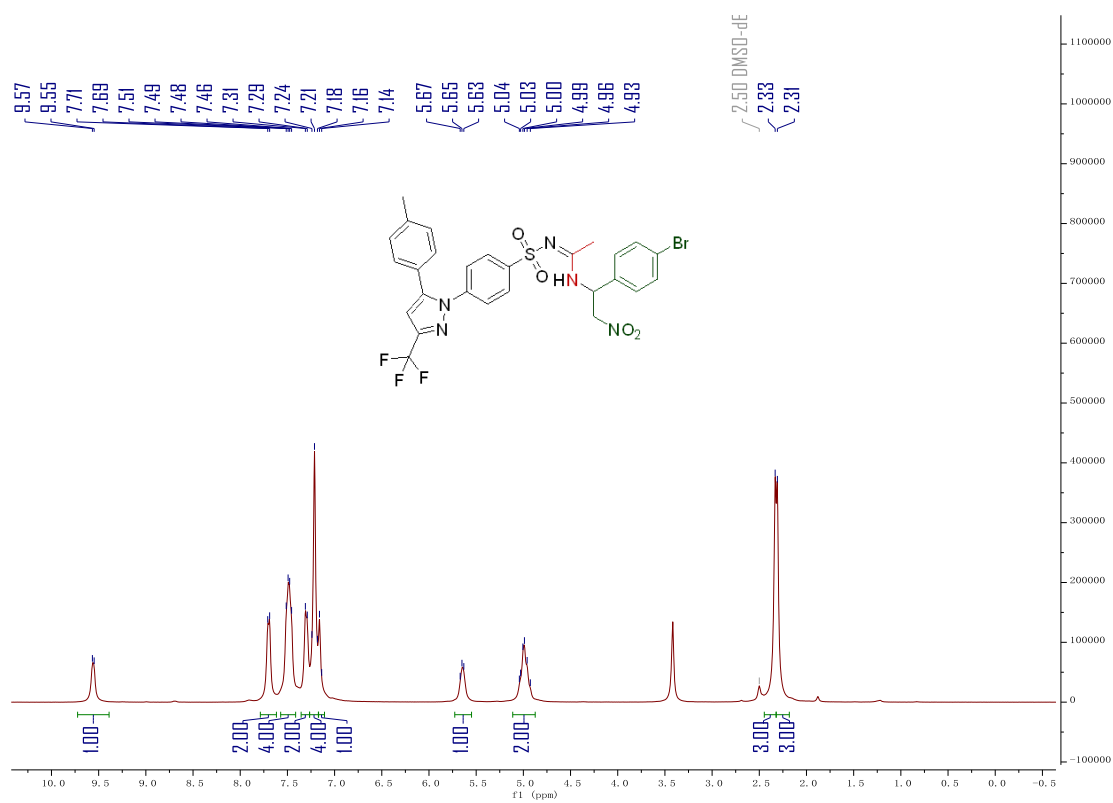

**<sup>13</sup>C NMR (100 MHz, DMSO-*d*<sub>6</sub>) of compound 7i**

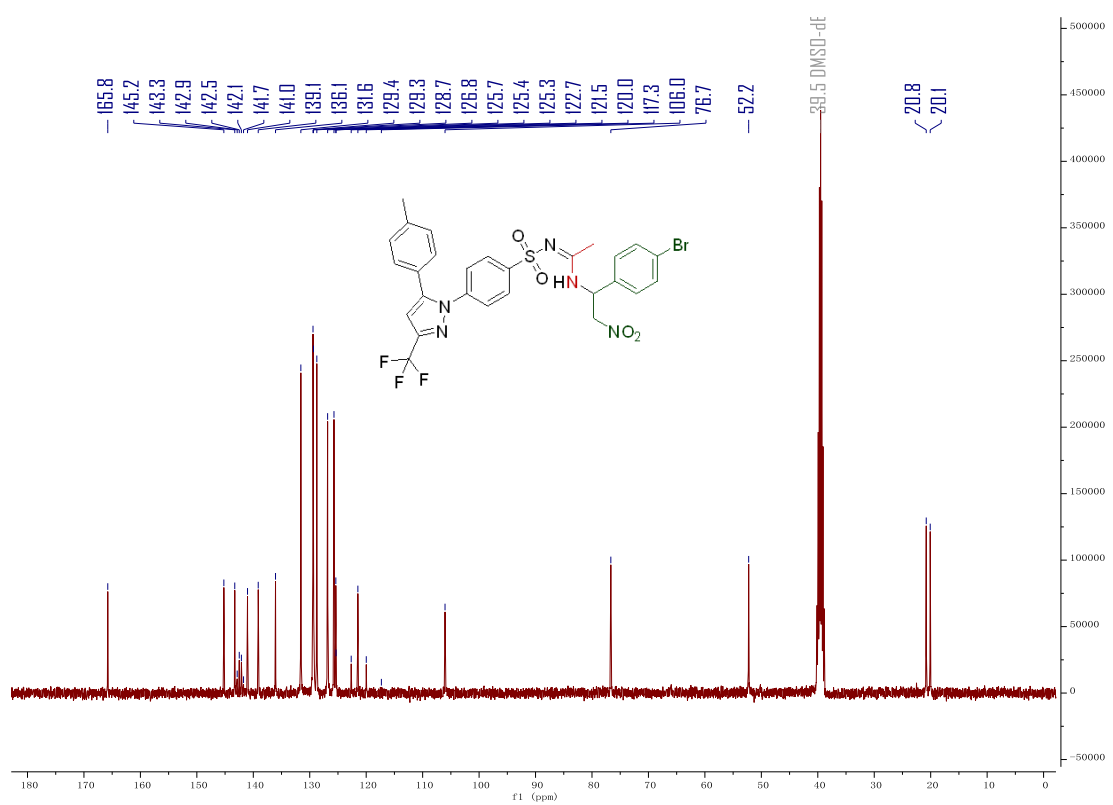





<sup>1</sup>H NMR (400 MHz, DMSO-*d*<sub>6</sub>) of compound 7j

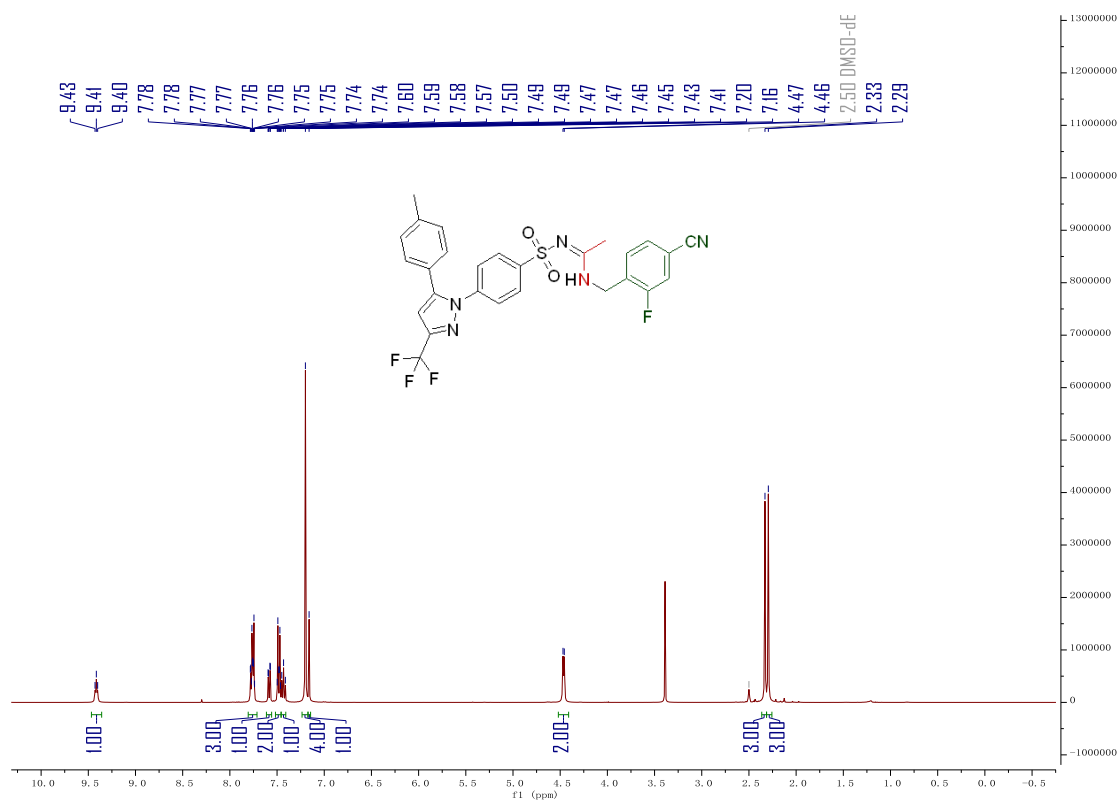

<sup>13</sup>C NMR (100 MHz, DMSO-*d*<sub>6</sub>) of compound 7j

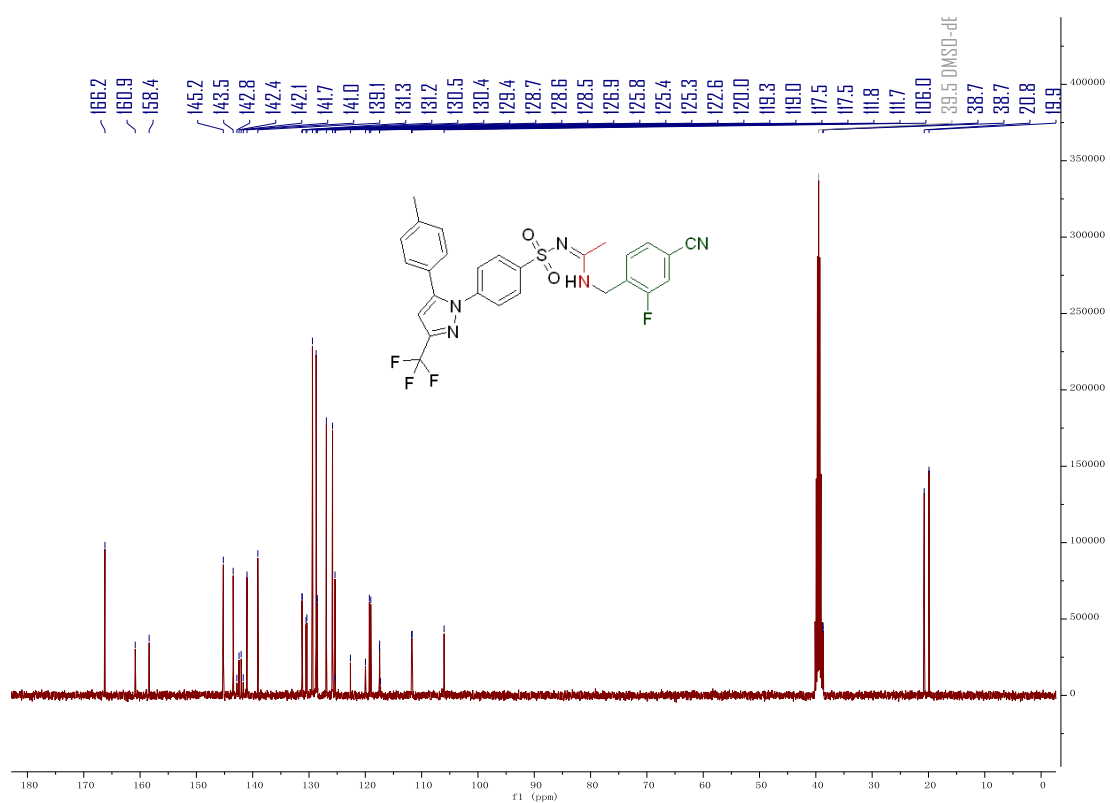

<sup>19</sup>F NMR (376 MHz, DMSO-*d*<sub>6</sub>) of compound 7j

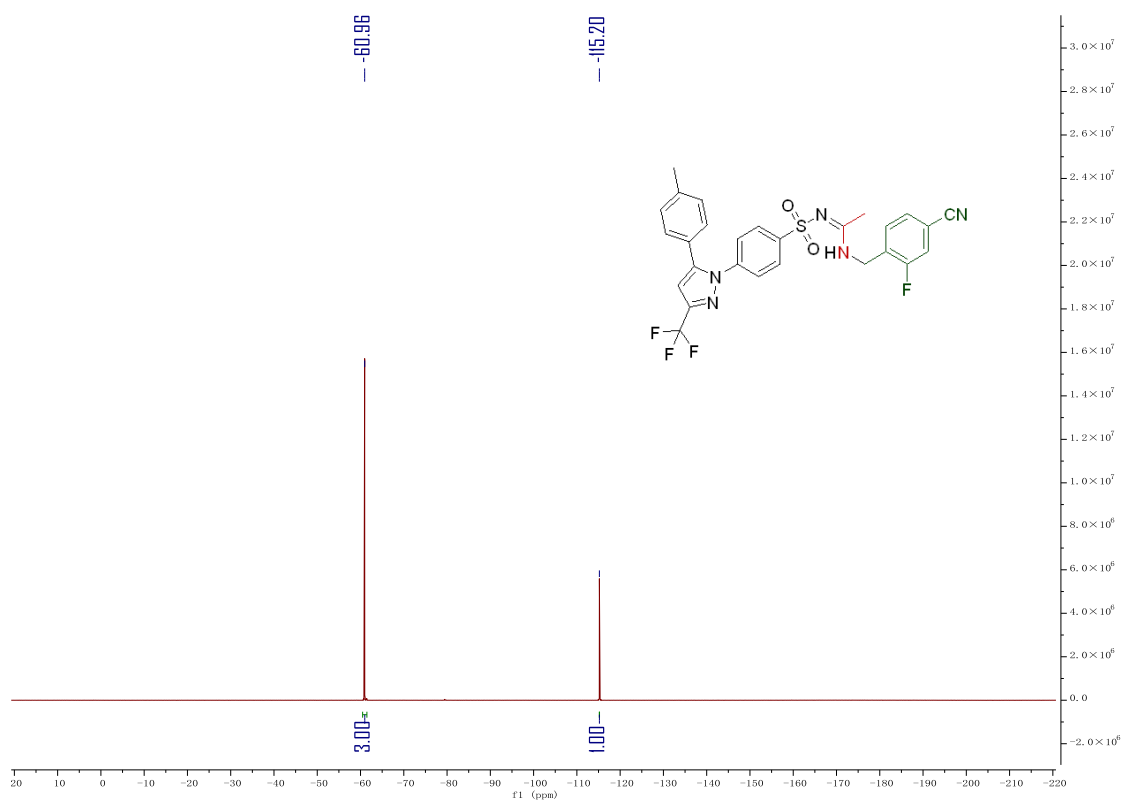

Supplement: d4nj02051k1.pdf [file d4nj02051k1.pdf]
